# Supplementary material for: 2-Pyridine Carboxaldehyde for Semi-Automated Soft Spot Identification in Cyclic Peptides
Source: MDPI journal article supplement (doi:10.3390/ijms23084269), 2022-04-12
Supplement: s1 [file s1]

# 2-Pyridine Carboxaldehyde for Semi-Automated Soft Spot Identification in Cyclic Peptides

Haiying Zhang, Silvi Chacko, and Joe R. Cannon

Department of Metabolism and Pharmacokinetics, Bristol-Myers Squibb Company, Princeton, NJ

\*Correspondence: joe.cannon@bms.com

## Supplementary Information

**Supplementary Figure S1.** Histogram depicting empirically defined N-terminal amino acid dependence on derivatization efficiency for the 2PCA moiety.

**Supplementary Table S1.** All SEQUEST identified peptides from HeLa lysate tryptic digest in the absence of 2PCA (1<sup>st</sup> replicate).

**Supplementary Table S2.** All SEQUEST identified peptides from HeLa lysate tryptic digest in the absence of 2PCA (2<sup>nd</sup> replicate).

**Supplementary Table S3.** All SEQUEST identified peptides from HeLa lysate tryptic digest in the presence of 2PCA (1<sup>st</sup> replicate).

**Supplementary Table S4.** All SEQUEST identified peptides from HeLa lysate tryptic digest in the presence of 2PCA (2<sup>nd</sup> replicate).

**Supplementary Table S5.** All 2PCA modified SEQUEST identified peptides from HeLa lysate tryptic digest in the presence of 2PCA (1<sup>st</sup> replicate).

**Supplementary Table S6.** All 2PCA modified SEQUEST identified peptides from HeLa lysate tryptic digest in the presence of 2PCA (2<sup>nd</sup> replicate).

**Supplementary Table S7.** Calculated derivatization efficiency of 2PCA on a per N-terminal amino acid basis.

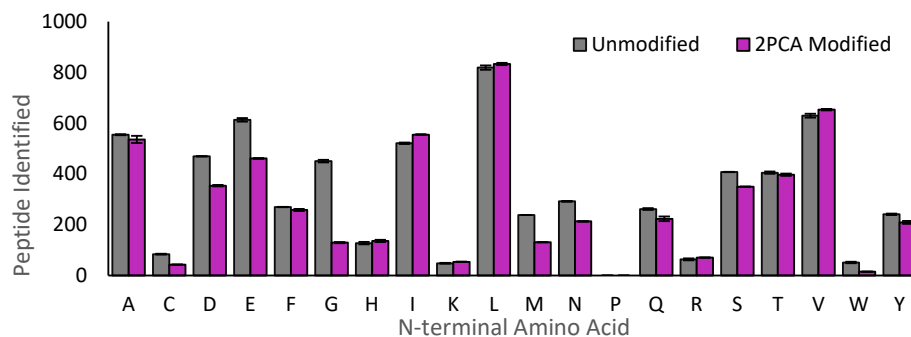

**Supplementary Figure S1.** Histogram depicting empirically defined N-terminal amino acid dependence on derivatization efficiency for the 2PCA moiety.
