# Supplementary material for: 2-Pyridine Carboxaldehyde for Semi-Automated Soft Spot Identification in Cyclic Peptides
Source: Int J Mol Sci. 2022 Apr 12;23(8):4269. doi: 10.3390/ijms23084269 (PMC9028278; doi:10.3390/ijms23084269)
Supplement: Supplementary file 1 [file ijms-23-04269-s001.zip › 17_Feb_2022_2PCA_Supplementary_Info.xlsx]

## Sheet: Supp Table S1 - Control A
Checked	Confidence	Sequence	Modifications	# Protein Groups	# Proteins	# PSMs	Master Protein Accessions	# Missed Cleavages	Theo. MH+ [Da]	Confidence (by Search Engine): Sequest HT	XCorr (by Search Engine): Sequest HT	First Amino Acid
TRUE	High	VISHAISEHVEDAGVHSGDATLMLPTQTISQGAIEK		1	1	2	P31327	0	3741.88	High	9.4	V
FALSE	High	FQSSAVMALQEASEAYLVGLFEDTNLCAIHAK	1xCarbamidomethyl [C27]	1	1	24	Q71DI3	0	3513.7	High	8.52	F
FALSE	High	GGLGGGYGGASGMGGITAVTVNQSLLSPLVLEVDPNIQAVR		1	1	14	P05787	0	3925.05	High	8.11	G
FALSE	High	VPGPVQQALQSAEMSLDEIEQVILVGGATR		1	1	1	Q9Y4L1	0	3135.64	High	8.08	V
FALSE	High	TPAVEGLTEAEEEELRAELTK		1	1	2	O43399	1	2315.16	High	8	T
FALSE	High	AQAALQAVNSVQSGNLALAASAAAVDAGMAMAGQSPVLR		1	1	11	P26599	0	3680.88	High	7.97	A
FALSE	High	SQDDEIGDGTTGVVVLAGALLEEAEQLLDR		1	1	1	P48643	0	3113.55	High	7.93	S
FALSE	High	ELEQVCNPIISGLYQGAGGPGPGGFGAQGPK	1xCarbamidomethyl [C6]	1	1	14	P0DMV9	0	3055.49	High	7.91	E
FALSE	High	VAVSADPNVPNVVVTGLTLVCSSAPGPLELDLTGDLESFK	1xCarbamidomethyl [C21]	1	1	7	P52565	0	4081.1	High	7.87	V
FALSE	High	HTGPGILSMANAGPNTNGSQFFICTAK	1xCarbamidomethyl [C24]	1	1	3	P62937	0	2791.33	High	7.86	H
FALSE	High	VIHDNFGIVEGLMTTVHAITATQK		1	1	32	P04406	0	2595.36	High	7.82	V
FALSE	High	ALANVNIGSLICNVGAGGPAPAAGAAPAGGPAPSTAAAPAEEK	1xCarbamidomethyl [C12]	1	1	15	P05386	0	3808.93	High	7.8	A
FALSE	High	HIADLAGNSEVILPVPAFNVINGGSHAGNK		1	1	10	P06733	0	3011.57	High	7.74	H
FALSE	High	MAEIGEHVAPSEAANSLEQAQAAAER		1	1	1	P27708	0	2680.26	High	7.71	M
FALSE	High	MDTEGFGELLQQAEQLAAETEGISELPHVER	1xAcetyl [N-Term]	1	1	2	Q8N1F7	0	3469.64	High	7.69	M
FALSE	High	FQSAAIGALQEASEAYLVGLFEDTNLCAIHAK	1xCarbamidomethyl [C27]	1	1	17	P84243	0	3437.7	High	7.61	F
FALSE	High	RNDFQLIGIQDGYLSLLQDSGEVR		1	1	14	P63241	1	2736.4	High	7.6	R
FALSE	High	FQSSAVMALQEACEAYLVGLFEDTNLCAIHAK	2xCarbamidomethyl [C13; C27]	1	1	12	P68431	0	3586.7	High	7.58	F
FALSE	High	VIQGLYSGVTTVELDTLAAETAATLTTK		1	1	5	P23921	0	2866.53	High	7.57	V
FALSE	High	AFLADPSAFVAAAPVAAATTAAPAAAAAPAK		1	1	18	P05388	0	2752.47	High	7.54	A
FALSE	High	FLNEHPGGEEVLLEQAGVDASESFEDVGHSSDAR		1	1	1	O43169	0	3627.65	High	7.54	F
FALSE	High	AEGSDVANAVLDGADCIMLSGETAK	1xCarbamidomethyl [C16]	1	1	30	P14618	0	2494.14	High	7.52	A
FALSE	High	WSGPLSLQEVDEQPQHPLHVTYAGAAVDELGK		1	1	11	P30086	0	3471.72	High	7.45	W
FALSE	High	CPEALFQPSFLGMESCGIHETTFNSIMK	2xCarbamidomethyl [C1; C16]	1	2	60	P60709	0	3231.46	High	7.42	C
FALSE	High	FGGEHVPNSPFQVTALAGDQPSVQPPLR		1	1	3	P21333	0	2945.49	High	7.42	F
FALSE	High	ADHQPLTEASYVNLPTIALCNTDSPLR	1xCarbamidomethyl [C20]	1	1	9	P08865	0	2996.48	High	7.41	A
FALSE	High	GINPDEAVAYGAAVQAGVLSGDQDTGDLVLLDVCPLTLGIETVGGVMTK	1xCarbamidomethyl [C34]	1	1	11	P11021	0	4899.46	High	7.39	G
FALSE	High	TNHIGHTGYLNTVTVSPDGSLCASGGK	1xCarbamidomethyl [C22]	1	1	3	P63244	0	2743.31	High	7.38	T
FALSE	High	NPNAMLVNLEEPLASTYQDILYQAK		1	1	5	P46940	0	2835.42	High	7.37	N
FALSE	High	EAMQQADDWLGVPQVITPEEIIHPDVDEHSVMTYLSQFPK		1	1	8	O75369	0	4593.2	High	7.28	E
FALSE	High	TEGNIDDSLIGGNASAEGPEGEGTESTVITGVDIVMNHHLQETSFTK		1	1	1	P13693	0	4857.26	High	7.27	T
FALSE	High	HSSVYPTQEELEAVQNMVSHTER		1	1	3	Q12906	0	2671.24	High	7.23	H
FALSE	High	GSSGASVAAAAAAAVAVVESMVTATEVAPPPPPVEVPIR		1	1	1	Q14839	0	3626.91	High	7.21	G
FALSE	High	TGPAATTLPDGAAAESLVESSEVAVIGFFK		1	1	6	P07237	0	2935.49	High	7.2	T
FALSE	High	CDVTQSQPLGAVPLPPADCVLSTLCLDAACPDLPTYCR	5xCarbamidomethyl [C1; C19; C25; C30; C37]	1	1	6	P40261	0	4230.96	High	7.19	C
FALSE	High	TALLDAAGVASLLTTAEVVVTEIPK		1	1	16	P10809	0	2482.4	High	7.14	T
FALSE	High	RPLIDQVVQTALSETQDPEEVSVTVK		1	1	11	Q00610	0	2881.52	High	7.14	R
FALSE	High	MFQSTAGSGGVQEDALMAVSTLVEVLGGEFLK		1	1	1	Q14974	0	3271.62	High	7.13	M
FALSE	High	TTGIVMDSGDGVTHTVPIYEGYALPHAILR		1	2	44	P60709	0	3183.61	High	7.13	T
FALSE	High	ASASGSGAQVGGPISSGSSASSVTVTR		1	1	1	P02545	0	2365.16	High	7.09	A
FALSE	High	LVEGTINPGETCLIIEDVVTSGSSVLETVEVLQK	1xCarbamidomethyl [C12]	1	1	2	P11172	0	3628.89	High	7.05	L
FALSE	High	ILTVEDHYYEGGIGEAVSSAVVGEPGITVTHLAVNR		1	1	5	P29401	0	3752.91	High	7.03	I
FALSE	High	IQQLVQDIASLTLLEISDLNELLK		1	1	1	P52815	0	2709.53	High	6.99	I
FALSE	High	LASPSGSTSSGLEVVAPEGTSAPGGGPGTLDDSATICR	1xCarbamidomethyl [C37]	1	1	1	Q13263	0	3558.69	High	6.98	L
FALSE	High	IHVSDQELQSANASVDDSRLEELK		1	1	2	P22314	1	2683.32	High	6.96	I
FALSE	High	QAFTDVATGSLGQGLGAACGMAYTGK	1xCarbamidomethyl [C19]	1	1	7	P29401	0	2532.19	High	6.95	Q
FALSE	High	EAMQQADDWLGIPQVITPEEIVDPNVDEHSVMTYLSQFPK		1	1	6	P21333	0	4570.18	High	6.92	E
FALSE	High	SENVQDLLLLDVAPLSLGLETAGGVMTALIK		1	1	4	P0DMV9	0	3180.74	High	6.89	S
FALSE	High	DGEDQTQDTELVETRPAGDGTFQK		1	3	2	P10321	0	2637.19	High	6.89	D
FALSE	High	AIVDCGFEHPSEVQHECIPQAILGMDVLCQAK	3xCarbamidomethyl [C5; C17; C29]	2	2	15	O00148; Q13838	0	3651.71	High	6.87	A
FALSE	High	NMITGTSQADCAVLIVAAGVGEFEAGISK	1xCarbamidomethyl [C11]	1	3	43	P68104	0	2909.44	High	6.87	N
FALSE	High	QFAPIHAEAPEFMEMSVEQEILVTGIK		1	1	5	P06576	0	3044.51	High	6.87	Q
FALSE	High	LPGEGAALADACEAMVAVMAALGVAVDGGK	1xCarbamidomethyl [C12]	1	1	1	O15067	0	2814.38	High	6.86	L
FALSE	High	DQAVENILVSPVVVASSLGLVSLGGK		1	1	10	P50454	0	2551.43	High	6.85	D
FALSE	High	DGVADVSIEDSVISLSGDHCIIGR	1xCarbamidomethyl [C20]	1	1	8	P00441	0	2514.21	High	6.85	D
FALSE	High	VGATAAVYSAAILEYLTAEVLELAGNASK		1	2	2	Q71UI9	0	2895.53	High	6.85	V
FALSE	High	ALVDHENVISCPHLGASTK	1xCarbamidomethyl [C11]	1	1	3	O43175	0	2048.02	High	6.84	A
FALSE	High	NPQQHLNAQPQVTMQQPAVHVQGQEPLTASMLASAPPQEQK		1	1	1	P11940	0	4457.21	High	6.84	N
FALSE	High	FWEVISDEHGIDPTGTYHGDSDLQLDR		1	1	12	P07437	0	3102.41	High	6.82	F
FALSE	High	QVYEEEYGSSLEDDVVGDTSGYYQR		1	1	2	P08758	0	2888.24	High	6.82	Q
FALSE	High	AFADALEVIPMALSENSGMNPIQTMTEVR		1	1	7	P48643	0	3135.52	High	6.8	A
FALSE	High	LGLGIDEDDPTADDTSAAVTEEMPPLEGDDDTSR		1	1	5	P07900	0	3547.54	High	6.79	L
FALSE	High	EGICALGGTSELSSEGTQHSYSEEEK	1xCarbamidomethyl [C4]	1	1	2	P13797	0	2785.21	High	6.78	E
FALSE	High	IFVGNVDGADTTPEELAALFAPYGTVMSCAVMK	1xCarbamidomethyl [C29]	1	1	4	Q96PK6	0	3474.66	High	6.76	I
FALSE	High	APKPDGPGGGPGGSHMGGNYGDDR		1	1	4	P35637	0	2252.97	High	6.75	A
FALSE	High	EQQEAIEHIDEVQNEIDRLNEQASEEILK		1	1	9	Q01105	1	3449.67	High	6.74	E
FALSE	High	GYSFGHPSSVAGEVVFNTGLGGYPEAITDPAYK		1	1	5	P31327	0	3387.62	High	6.72	G
FALSE	High	EGSGIGAIDSNLDWSHNFTNMLGYTDHQFTELTR		1	1	1	O75390	0	3826.74	High	6.7	E
FALSE	High	VDEFPLCGHMVSDEYEQLSSEALEAAR	1xCarbamidomethyl [C7]	1	1	13	P27635	0	3082.38	High	6.68	V
FALSE	High	MPDGPVALEESYSAVMGIVSEVEQYVK		1	1	1	Q14204	0	2927.41	High	6.67	M
FALSE	High	YTLPPGVDPTQVSSSLSPEGTLTVEAPMPK		1	1	8	P04792	0	3098.56	High	6.66	Y
FALSE	High	SKDDQVTVIGAGVTLHEALAAAELLK		1	1	6	P29401	1	2649.45	High	6.66	S
FALSE	High	ERPTPSLNNNCTTSEDSLVLYNR	1xCarbamidomethyl [C11]	1	1	1	P07814	0	2680.26	High	6.66	E
FALSE	High	GGPGSAVSPYPTFNPSSDVAALHK		1	1	2	P04083	0	2356.16	High	6.64	G
FALSE	High	IIPTLEEGLQLPSPTATSQLPLESDAVECLNYQHYK	1xCarbamidomethyl [C29]	1	1	22	P61978	0	4055.03	High	6.63	I
FALSE	High	TFSHELSDFGLESTAGEIPVVAIR		1	1	17	P30101	0	2575.3	High	6.63	T
FALSE	High	SGETEDTFIADLVVGLCTGQIK	1xCarbamidomethyl [C17]	1	3	28	P06733	0	2353.16	High	6.63	S
FALSE	High	AYHEQLSVAEITNACFEPANQMVK	1xCarbamidomethyl [C15]	2	5	5	Q71U36; P68366	0	2750.29	High	6.62	A
FALSE	High	RPQYSNPPVQGEVMEGADNQGAGEQGRPVR		1	1	2	P67809	0	3223.53	High	6.62	R
FALSE	High	GNFGGSFAGSFGGAGGHAPGVAR		1	1	1	P52272	0	2034.95	High	6.61	G
FALSE	High	EETVLATVQALQTASHLSQQADLR		1	1	1	P04844	0	2609.35	High	6.6	E
FALSE	High	YDCGEEILITVLSAMTEEAAVAIK	1xCarbamidomethyl [C3]	1	2	3	P63241	0	2626.3	High	6.6	Y
FALSE	High	MDLIDLEDETIDAEVMNSLAVTMDDFR		1	1	1	P55072	0	3101.4	High	6.58	M
FALSE	High	LAYVAAGDLAPINAFIGGLAAQEVMK		1	1	11	P22314	0	2603.39	High	6.58	L
FALSE	High	CISEVQANNVVLGQYVGNPDGEGEATK	1xCarbamidomethyl [C1]	1	1	1	P11413	0	2848.34	High	6.58	C
FALSE	High	NMGGPYGGGNYGPGGSGGSGGYGGR		1	1	5	P22626	0	2189.91	High	6.56	N
FALSE	High	AQGPAASAEEPKPVEAPAANSDQTVTVK		1	1	2	P80723	0	2763.38	High	6.55	A
FALSE	High	EADIDGDGQVNYEEFVQMMTAK		1	1	16	P0DP25	0	2490.08	High	6.53	E
FALSE	High	DGTVTAGNASGVADGAGAVIIASEDAVK		1	1	2	P42765	0	2516.25	High	6.53	D
FALSE	High	EQDQRPLHPVANPHAEISTK		1	1	1	Q9NX58	0	2267.15	High	6.53	E
FALSE	High	FEALAAHDALVELSGAMNTTACSLMK	1xCarbamidomethyl [C22]	1	1	4	P07954	0	2751.32	High	6.52	F
FALSE	High	LNCQVIGASVDSHFCHLAWVNTPK	2xCarbamidomethyl [C3; C15]	1	1	7	Q06830	0	2753.33	High	6.5	L
FALSE	High	INNVIDNLIVAPGTFEVQIEEVR		1	1	5	Q12905	0	2582.38	High	6.49	I
FALSE	High	ERLEQQVPVNQVFGQDEMIDVIGVTK		1	1	2	P39023	1	2971.52	High	6.48	E
FALSE	High	TGDFQLHTNVNDGTEFGGSIYQK		1	1	1	P45880	0	2528.17	High	6.48	T
FALSE	High	HAVSDPSILDSLDLNEDEREVLINNINR		1	1	1	P05198	1	3190.6	High	6.48	H
FALSE	High	DDEAAAVALSSLIHALDDLDMVAIVR		1	1	1	P13010	0	2723.39	High	6.48	D
FALSE	High	GGMGSGGLATGIAGGLAGMGGIQNEK		1	1	5	P05783	0	2261.1	High	6.47	G
FALSE	High	TLNETELTELQSQISDTSVVLSMDNSR		1	1	10	P08729	0	3010.45	High	6.46	T
FALSE	High	LNFSHGTHEYHAETIK		1	1	6	P14618	0	1883.9	High	6.46	L
FALSE	High	SLAGSSGPGASSGTSGDHGELVVR		1	1	3	P29692	0	2185.05	High	6.45	S
FALSE	High	TSRPENAIIYNNNEDFQVGQAK		1	1	4	P29401	0	2508.21	High	6.43	T
FALSE	High	EGNDLYHEMIESGVINLK		1	1	5	P06576	0	2061	High	6.43	E
FALSE	High	LLEDGEDFNLGDALDSSNSMQTIQK		1	1	14	P05783	0	2740.26	High	6.42	L
FALSE	High	EAATLEVERPLPMEVEK		1	1	4	P51858	0	1941	High	6.42	E
FALSE	High	LADDVDLEQVANETHGHVGADLAALCSEAALQAIR	1xCarbamidomethyl [C26]	1	1	3	P55072	0	3672.79	High	6.41	L
FALSE	High	LAELEEFINGPNNAHIQQVGDR		1	1	2	Q00610	0	2464.22	High	6.41	L
FALSE	High	INALTAASEAACLIVSVDETIK	1xCarbamidomethyl [C12]	1	1	9	Q99832	0	2289.2	High	6.39	I
FALSE	High	THTQDAVPLTLGQEFSGYVQQVK		1	1	1	P07954	0	2546.29	High	6.39	T
FALSE	High	EIAEAYLGYPVTNAVITVPAYFNDSQR		1	1	12	P0DMV9	0	3001.49	High	6.38	E
FALSE	High	ADRDESSPYAAMLAAQDVAQR		1	1	4	P62263	1	2265.06	High	6.38	A
FALSE	High	EVAAFAQFGSDLDAATQQLLSR		1	1	16	P25705	0	2338.17	High	6.38	E
FALSE	High	AHIANPSGASTECFVTDNADGTYQVEYTPFEK	1xCarbamidomethyl [C13]	1	1	1	O75369	0	3519.56	High	6.38	A
FALSE	High	IGEEQSAEDAEDGPPELLFIHGGHTAK		1	1	2	Q16576	0	2847.34	High	6.37	I
FALSE	High	EAESCDCLQGFQLTHSLGGGTGSGMGTLLISK	2xCarbamidomethyl [C5; C7]	2	5	60	P07437; P68371	0	3311.53	High	6.36	E
FALSE	High	ADDPSSYMEVVQAANTSGNWEELVK		1	1	5	Q00610	0	2740.24	High	6.33	A
FALSE	High	LGEVSVESENYVQAVEEFQSCLNLQEQYLEAHDR	1xCarbamidomethyl [C21]	1	1	6	P49321	0	4012.85	High	6.33	L
FALSE	High	LGSAADFLLDISETDLSSLTASIK		1	1	13	O75369	0	2467.28	High	6.32	L
FALSE	High	ASEPGLAQLLVDQIYENAMIAAGLVDDPR		1	1	1	Q12931	0	3069.56	High	6.31	A
FALSE	High	QATVGDINTERPGMLDFTGK		1	1	1	P07108	0	2150.05	High	6.31	Q
FALSE	High	VGTDMLEEQITAFEDYVQSMDVAAFNK		1	1	10	P24534	0	3051.4	High	6.31	V
FALSE	High	GILGYTEHQVVSSDFNSDTHSSTFDAGAGIALNDHFVK		1	1	10	P04406	0	4036.89	High	6.31	G
FALSE	High	IEPELDGSAQVTSHDASTNGLINFIK		1	1	2	P06744	0	2756.37	High	6.31	I
FALSE	High	MEDSMDMDMSPLRPQNYLFGCELK	1xAcetyl [N-Term]; 1xCarbamidomethyl [C21]	1	1	17	P06748	0	2949.26	High	6.31	M
FALSE	High	ALVLDCHYPEDEVGQEDEAESDIFSIR	1xCarbamidomethyl [C6]	1	1	14	Q07021	0	3136.41	High	6.3	A
FALSE	High	LASVPAGGAVAVSAAPGSAAPAAGSAPAAAEEK		1	1	7	P05387	0	2774.43	High	6.29	L
FALSE	High	HGEVCPAGWKPGSDTIKPDVQK	1xCarbamidomethyl [C5]	1	1	5	Q06830	0	2406.19	High	6.27	H
FALSE	High	LVQDVANNTNEEAGDGTTTATVLAR		1	1	5	P10809	0	2560.25	High	6.24	L
FALSE	High	LQVEPAVDTSGVQCYGPGIEGQGVFR	1xCarbamidomethyl [C14]	1	1	3	P21333	0	2763.34	High	6.24	L
FALSE	High	FTLDCTHPVEDGIMDAANFEQFLQER	1xCarbamidomethyl [C5]	1	1	12	P35268	0	3083.39	High	6.23	F
FALSE	High	ACANPAAGSVILLENLR	1xCarbamidomethyl [C2]	1	1	15	P00558	0	1768.94	High	6.23	A
FALSE	High	VGAGAPVYMAAVLEYLTAEILELAGNAAR	1xOxidation [M9]	1	2	1	Q16777	0	2949.54	High	6.22	V
FALSE	High	FQSSHHPTDITSLDQYVER		1	1	2	P14625	0	2260.06	High	6.22	F
FALSE	High	VAPEEHPVLLTEAPLNPK		1	2	23	P60709	0	1954.06	High	6.22	V
FALSE	High	YLSQEEAQAVDQELFNEYQFSVDQLMELAGLSCATAIAK	1xCarbamidomethyl [C33]	1	1	2	Q8NCW5	0	4410.08	High	6.21	Y
FALSE	High	YFAGNLASGGAAGATSLCFVYPLDFAR	1xCarbamidomethyl [C18]	1	2	8	P12236	0	2796.35	High	6.21	Y
FALSE	High	FQEHLQLQNLGINPANIGFSTLTMESDK		1	1	1	Q00610	0	3145.56	High	6.2	F
FALSE	High	GEMMDLQHGSLFLQTPK		1	1	5	P07195	0	1931.94	High	6.2	G
FALSE	High	MNEEYDVIVLGTGLTECILSGIMSVNGK	1xAcetyl [N-Term]; 1xCarbamidomethyl [C17]	1	1	2	P50395	0	3084.49	High	6.19	M
FALSE	High	FWEVISDEHGIDPTGTYHGDSDLQLER		1	2	13	P68371	0	3116.42	High	6.17	F
FALSE	High	FLESGGQDGAGDDDDLEDLEEAEEPDMEEDDDQK		1	1	2	P07237	0	3757.45	High	6.17	F
FALSE	High	IGEHTPSALAIMENANVLAR		1	1	24	P04075	0	2107.1	High	6.17	I
FALSE	High	IPSAVGYQPTLATDMGTMQER		1	1	5	P06576	0	2266.08	High	6.17	I
FALSE	High	DLTDGHFENILADNSVNDQTK		1	1	3	P36952	0	2346.08	High	6.17	D
FALSE	High	GLIDGVVEADLVEALQEFGPISYVVVMPK		1	1	1	P14866	0	3087.63	High	6.15	G
FALSE	High	IAAQDLLLAVATDFQNESAAALAAAATR		1	1	9	Q96P70	0	2786.47	High	6.15	I
FALSE	High	VSGQGLHEGHTFEPAEFIIDTR		1	1	3	P21333	0	2440.19	High	6.14	V
FALSE	High	AAEAAAAPAESAAPAAGEEPSK		1	1	4	P80723	0	1966.94	High	6.13	A
FALSE	High	TTIPEEEEEEEEAAGVVVEEELFHQQGTPR		1	1	3	P20700	0	3411.57	High	6.13	T
FALSE	High	NGQHVASSPIPVVISQSEIGDASR		1	1	1	P21333	0	2448.25	High	6.12	N
FALSE	High	LTLYDIAHTPGVAADLSHIETK		1	1	4	P40926	0	2365.24	High	6.12	L
FALSE	High	DLLPSDMAVALLEAQAGTGHIIDPATSAR		1	1	5	Q15149	0	2933.5	High	6.11	D
FALSE	High	SPEEGAETPVYLALLPPDAEGPHGQFVSEK		1	1	1	P16152	0	3164.54	High	6.11	S
FALSE	High	SENVQDLLLLDVTPLSLGIETAGGVMTVLIK		1	1	1	P11142	0	3238.79	High	6.11	S
FALSE	High	AQGPAASAEEPKPVEAPAANSDQTVTVKE		1	1	2	P80723	1	2892.42	High	6.1	A
FALSE	High	DPPVILYDEATSSLDSITEETILGAMK		1	1	4	O75027	0	2908.44	High	6.1	D
FALSE	High	YCVQLSQIQGLIGSVEEQLAQLR	1xCarbamidomethyl [C2]	1	1	10	Q04695	0	2632.38	High	6.1	Y
FALSE	High	QNFTEPTAIQAQGWPVALSGLDMVGVAQTGSGK		1	1	4	P17844	0	3358.67	High	6.09	Q
FALSE	High	IEVQDTSGGTTALRPSASTQALSSSVSSSK		1	1	1	Q16531	0	2952.48	High	6.09	I
FALSE	High	QVLGQMVIDEELLGDGHSYSPR		1	1	2	P28070	0	2443.19	High	6.09	Q
FALSE	High	LGLGIDEDEVAAEEPNAAVPDEIPPLEGDEDASR		1	1	11	P08238	0	3532.64	High	6.08	L
FALSE	High	ALQSGQCAGAALDVFTEEPPRDR	1xCarbamidomethyl [C7]	1	1	5	O43175	1	2488.19	High	6.08	A
FALSE	High	FPEELTQTFMSCNLITGMFQR	1xCarbamidomethyl [C12]	1	1	10	P26641	0	2550.18	High	6.08	F
FALSE	High	QPYAVSELAGHQTSAESWGTGR		1	1	2	P36578	0	2332.1	High	6.07	Q
FALSE	High	NPGVGNGDDEAAELMQQVNVLK		1	1	1	Q15691	0	2298.1	High	6.07	N
FALSE	High	EENVGLHQTLDQTLNELNCI	1xCarbamidomethyl [C19]	1	1	4	P67936	0	2340.11	High	6.07	E
FALSE	High	RGFAFVTFDDHDSVDK		1	2	1	P09651	1	1855.86	High	6.07	R
FALSE	High	FQPGETLTEILETPATSEQEAEHQR		1	1	3	P46940	0	2841.35	High	6.06	F
FALSE	High	EGPYDVVVLPGGNLGAQNLSESAAVK		1	1	7	Q99497	0	2584.33	High	6.06	E
FALSE	High	EEETEAAIGAPPTATEGPETKPVLMALAEGPGAEGPR		1	1	2	Q13263	0	3673.79	High	6.05	E
FALSE	High	LCYVALDFEQEMATAASSSSLEK	1xCarbamidomethyl [C2]	1	3	159	P60709	0	2550.17	High	6.05	L
FALSE	High	VGEAGLLSVDCSEAGPGALGLEAVSDSGTK	1xCarbamidomethyl [C11]	1	1	1	O75369	0	2846.37	High	6.05	V
FALSE	High	ELASQPDVDGFLVGGASLKPEFVDIINAK		1	1	22	P60174	0	3029.58	High	6.05	E
FALSE	High	EQQEAIEHIDEVQNEIDR		1	2	5	Q01105	0	2195.02	High	6.05	E
FALSE	High	DDEFTHLYTLIVRPDNTYEVK		1	1	5	P27797	0	2568.26	High	6.04	D
FALSE	High	VETGVLKPGMVVTFAPVNVTTEVK		1	2	24	P68104	0	2515.38	High	6.04	V
FALSE	High	RAEDGSVIDYELIDQDAR		1	1	4	P07355	1	2064.98	High	6.03	R
FALSE	High	QNQVGVVPWSPPQSNWNPWTSSNIDEGPLAFATPEQISMDLK		1	1	3	Q08211	0	4665.24	High	6.03	Q
FALSE	High	FGQAATMEGIGAIGGTPPAFNR		1	1	1	Q15233	0	2163.07	High	6.03	F
FALSE	High	IGYNPDTVAFVPISGWNGDNMLEPSANMPWFK		1	2	17	P68104	0	3567.67	High	6.02	I
FALSE	High	YWSQQIEESTTVVTTQSAEVGAAETTLTELR		1	1	3	P05783	0	3428.67	High	6.01	Y
FALSE	High	IPVTDEEQTNVPYIYAIGDILEDK		1	1	7	Q16881	0	2735.37	High	6.01	I
FALSE	High	ETVVEVPQVTWEDIGGLEDVKR		1	1	2	P55072	1	2498.28	High	6	E
FALSE	High	LVGQGASAVLLDLPNSGGEAQAK		1	1	4	Q99714	0	2195.17	High	5.99	L
FALSE	High	INQVFHGSCITEGNELTK	1xCarbamidomethyl [C9]	1	1	2	P78527	0	2046.99	High	5.99	I
FALSE	High	QFLQAAEAIDDIPFGITSNSDVFSK		1	1	14	P07237	0	2713.34	High	5.99	Q
FALSE	High	VPAFEGDDGFCVFESNAIAYYVSNEELR	1xCarbamidomethyl [C11]	1	1	4	P26641	0	3198.44	High	5.99	V
FALSE	High	LGDPAEYAHLVQAIIENPFLNGEVIR		1	1	8	Q99714	0	2878.51	High	5.98	L
FALSE	High	AQDPSEVLTMLTNETGFEISSSDATVK		1	1	6	Q12905	0	2870.36	High	5.97	A
FALSE	High	AFAGDIANQLATDAVQILGGNGFNTEYPVEK		1	1	2	P11310	0	3223.59	High	5.97	A
FALSE	High	SPDVGLYGVIPECGETYHSDLAEAK	1xCarbamidomethyl [C13]	1	1	2	P46940	0	2707.26	High	5.97	S
FALSE	High	AAEAAAAPAESAAPAAGEEPSKEEGEPK		1	1	3	P80723	1	2636.23	High	5.96	A
FALSE	High	DELILEGNDIELVSNSAALIQQATTVK		1	1	11	P32969	0	2884.51	High	5.96	D
FALSE	High	AFADAMEVIPSTLAENAGLNPISTVTELR		1	1	6	P50991	0	3030.55	High	5.96	A
FALSE	High	VNLSQDLEHQLQNIIQELNLEILPPPEDPSVPVALNIGK		1	1	3	Q08211	0	4327.32	High	5.95	V
FALSE	High	VVGFHVLGPNAGEVTQGFAAALK		1	1	1	Q16881	0	2282.23	High	5.92	V
FALSE	High	NADTLPDQEELIQSATETIGSFLDSTSPLLAIAACTALGEIGR	1xCarbamidomethyl [C35]	1	1	1	Q5VYK3	0	4489.23	High	5.92	N
FALSE	High	TGQATVASGIPAGWMGLDCGPESSKK	1xCarbamidomethyl [C19]	1	1	2	P00558	1	2605.24	High	5.92	T
FALSE	High	QTTVSNSQQAYQEAFEISK		1	1	4	P31946	0	2159.03	High	5.92	Q
FALSE	High	HLEGLSEEAIMELNLPTGIPIVYELDK		1	1	9	P18669	0	3023.56	High	5.92	H
FALSE	High	AYHEQLTVAEITNACFEPANQMVK	1xCarbamidomethyl [C15]	1	1	2	Q9BQE3	0	2764.31	High	5.92	A
FALSE	High	VTIAQGGVLPNIQAVLLPK		2	10	60	Q16777; Q7L7L0	0	1931.17	High	5.91	V
FALSE	High	TAMSTPHVAEPAENEQDEQDENGAEASADLR		1	1	2	P26038	0	3312.42	High	5.91	T
FALSE	High	LLDFGSLSNLQVTQPTVGMNFK		1	1	13	P08708	0	2409.25	High	5.91	L
FALSE	High	YHVPVVVVPEGSASDTHEQAILR		1	1	1	P04844	0	2503.29	High	5.91	Y
FALSE	High	VEQIAAIAQELNELDYYDSHNVNTR		1	1	2	O43707	0	2905.4	High	5.91	V
FALSE	High	NEEDAAELVALAQAVNAR		1	1	5	P22314	0	1883.95	High	5.91	N
FALSE	High	TDDEVVQREEEAIQLDGLNASQIR		1	1	2	P14625	1	2728.34	High	5.91	T
FALSE	High	FDPTQFQDCIIQGLTETGTDLEAVAK	1xCarbamidomethyl [C9]	1	1	7	Q7L1Q6	0	2897.39	High	5.91	F
FALSE	High	EGILNDDIYCPPETAVLLASYAVQSK	1xCarbamidomethyl [C10]	1	1	14	P26038	0	2866.42	High	5.9	E
FALSE	High	AGQPHSSSDAAQAPAEQPHSSSDAAQAPCPR	1xCarbamidomethyl [C29]	1	1	1	P29372	0	3113.37	High	5.89	A
FALSE	High	TAAFLLPILSQIYSDGPGEALR		1	1	7	O00571	0	2332.25	High	5.89	T
FALSE	High	DNGPDGMEPEGVIESNWNEIVDSFDDMNLSESLLR		1	1	3	P60842	0	3923.72	High	5.89	D
FALSE	High	DLIADSNPMVVANAVAALSEISESHPNSNLLDLNPQNINK		1	1	3	P63010	0	4228.12	High	5.88	D
FALSE	High	TQTSDPAMLPTMIGLLAEAGVR		1	1	15	O43175	0	2272.17	High	5.88	T
FALSE	High	GQILTMANPIIGNGGAPDTTALDELGLSK		1	1	2	P31327	0	2867.48	High	5.88	G
FALSE	High	KPMVLGHEASGTVEK		1	1	1	Q00796	0	1582.83	High	5.88	K
FALSE	High	AGKPVICATQMLESMIK	1xCarbamidomethyl [C7]	1	1	16	P14618	0	1876.97	High	5.87	A
FALSE	High	SAGVQCFGPTAEAAQLESSK	1xCarbamidomethyl [C6]	1	1	2	P22102	0	2037.95	High	5.87	S
FALSE	High	LALADAGDTVEDANFVEAMADAGILR		1	1	5	Q9P2J5	0	2648.29	High	5.87	L
FALSE	High	ISSIQSIVPALEIANAHR		1	1	25	P10809	0	1919.07	High	5.87	I
FALSE	High	VLAGQTLDINMAGEPKPDRPK		1	1	1	Q9UKM9	0	2250.19	High	5.86	V
FALSE	High	LPAELQELPGLSHQYWSAPSDK		1	1	2	P27695	0	2466.23	High	5.86	L
FALSE	High	DLYANTVLSGGTTMYPGIADR		1	2	28	P60709	0	2215.07	High	5.85	D
FALSE	High	SAGQGEVLVYVEDPAGHQEEAK		1	1	2	P21333	0	2313.1	High	5.85	S
FALSE	High	SHYADVDPENQNFLLESNLGK		1	1	2	Q96QD8	0	2390.13	High	5.85	S
FALSE	High	EFFPLDESGNVVPSDTNILDTWAAMEELVDEGLVK		1	1	2	P15121	0	3879.85	High	5.85	E
FALSE	High	VGAGAPVYMAAVLEYLTAEILELAGNAAR		1	2	2	Q16777	0	2933.54	High	5.85	V
FALSE	High	GVEITGFPEAQALGLEVFHAGTALK		1	1	6	P22102	0	2555.35	High	5.85	G
FALSE	High	TATESFASDPILYRPVAVALDTK		1	1	24	P14618	0	2465.29	High	5.85	T
FALSE	High	WGDAGAEYVVESTGVFTTMEK		1	1	41	P04406	0	2277.04	High	5.84	W
FALSE	High	QLNSESLSQWTNPSTMANAK		1	1	4	P36952	0	2207.04	High	5.84	Q
FALSE	High	VLSEDEEDVDFDIIHNANDTFTVK		1	1	3	O75369	0	2765.28	High	5.83	V
FALSE	High	AVTNEPEEEELATLSEEEIAMAVTAWEK		1	1	5	P56192	0	3119.46	High	5.83	A
FALSE	High	NLEALALDLMEPEQAVDLTLPK		1	1	13	P12956	0	2423.27	High	5.83	N
FALSE	High	EFDYVINDLTAVPISTSPEEDSTWEFLR		1	1	2	P52788	0	3273.55	High	5.83	E
FALSE	High	VLELPYQGEELSMVILLPDDIEDESTGLK		1	1	2	P30740	0	3245.64	High	5.83	V
FALSE	High	VPADTEVVCAPPTAYIDFAR	1xCarbamidomethyl [C9]	1	1	7	P60174	0	2192.07	High	5.83	V
FALSE	High	DQFPEVYVPTVFENYVADIEVDGK		1	1	8	P61586	0	2773.32	High	5.82	D
FALSE	High	VGSAADIPINISETDLSLLTATVVPPSGR		1	1	5	P21333	0	2893.55	High	5.82	V
FALSE	High	MDLAAAAEPGAGSQHLEVR	1xAcetyl [N-Term]	1	1	2	Q14566	0	1964.95	High	5.81	M
FALSE	High	LGGGMPGLGQGPPTDAPAVDTAEQVYISSLALLK		1	1	5	O00487	0	3323.72	High	5.81	L
FALSE	High	IGEGLDQALPCLTELILTNNSLVELGDLDPLASLK	1xCarbamidomethyl [C11]	1	1	2	P09661	0	3734.98	High	5.81	I
FALSE	High	GTEWVDPEDPTVIAENELLGAAAAIEAAAK		1	1	5	Q9Y490	0	3051.52	High	5.81	G
FALSE	High	IDPTVTMMQVEEKPDVTYSDVGGCK	1xCarbamidomethyl [C24]	1	1	2	P35998	0	2799.29	High	5.81	I
FALSE	High	VSHVSTGGGASLELLEGK		1	2	5	P00558	0	1740.91	High	5.8	V
FALSE	High	HEAFESDLAAHQDR		2	4	1	P12814; O43707	0	1625.73	High	5.8	H
FALSE	High	LEGLTDEFEELEFLSTINVGLTSIANLPK		1	1	4	P39687	0	3192.66	High	5.79	L
FALSE	High	VAVSADPNVPNVVVTGLTLVCSSAPGPLELDLTGDLESFKK	1xCarbamidomethyl [C21]	1	1	1	P52565	1	4209.2	High	5.79	V
FALSE	High	NPSTVEAFDLAQSNSEHSR		1	1	1	O15067	0	2088.96	High	5.78	N
FALSE	High	FDENDVITCFANFESDEVELSYAK	1xCarbamidomethyl [C9]	1	1	12	Q00839	0	2842.24	High	5.78	F
FALSE	High	IEWLESHQDADIEDFK		1	1	5	P11021	0	1974.91	High	5.78	I
FALSE	High	ESPLSLYNEELVSMNVQGDYEPTDATGFININSLR		1	1	10	P00966	0	3915.86	High	5.78	E
FALSE	High	TLTAVHDAILEDLVFPSEIVGK		1	1	19	P62081	0	2367.28	High	5.77	T
FALSE	High	QAHLCVLASNCDEPMYVK	2xCarbamidomethyl [C5; C11]	1	1	2	P25398	0	2134.97	High	5.77	Q
FALSE	High	LQAALDDEEAGGRPAMEPGNGSLDLGGDSAGR		1	1	2	Q00839	0	3126.44	High	5.77	L
FALSE	High	MSVQPTVSLGGFEITPPVVLR		1	1	36	P06748	0	2227.22	High	5.75	M
FALSE	High	ISGETIFVTAPHEATAGIIGVNR		1	1	2	Q00610	0	2353.25	High	5.75	I
FALSE	High	IGDLQAFQGHGAGNLAGLK		1	1	3	P08195	0	1866.98	High	5.74	I
FALSE	High	GLVEPVDVVDNADGTQTVNYVPSR		1	1	4	P21333	0	2544.26	High	5.74	G
FALSE	High	FQSSAVMALQEASEAYLVGLFEDTNLCAIHAK	1xCarbamidomethyl [C27]; 1xOxidation [M7]	1	1	7	Q71DI3	0	3529.7	High	5.74	F
FALSE	High	NNQFQALLQYADPVSAQHAK		1	1	4	P26599	0	2243.12	High	5.73	N
FALSE	High	APKPEDIDEEDDDVPDLVENFDEASK		1	1	1	Q96K17	0	2931.29	High	5.73	A
FALSE	High	ASGPGLNTTGVPASLPVEFTIDAK		1	1	4	P21333	0	2342.22	High	5.73	A
FALSE	High	LAGANPAVITCDELLLGHEK	1xCarbamidomethyl [C11]	1	1	2	P78527	0	2121.1	High	5.73	L
FALSE	High	RGFEVVYMTEPIDEYCVQQLK	1xCarbamidomethyl [C16]	1	1	2	P08238	1	2604.25	High	5.71	R
FALSE	High	AVSDASAGDYGSAIETLVTAISLIK		1	1	6	Q16630	0	2452.28	High	5.71	A
FALSE	High	TCNVLVALEQQSPDIAQGVHLDR	1xCarbamidomethyl [C2]	1	1	2	P31153	0	2563.29	High	5.69	T
FALSE	High	DGTTHQTSLELFMYLNEVAGK		1	1	4	P00966	0	2354.13	High	5.69	D
FALSE	High	VGAGAPVYLAAVLEYLTAEILELAGNAAR		1	10	2	Q7L7L0	0	2915.59	High	5.69	V
FALSE	High	EMEENFAVEAANYQDTIGR		1	1	6	P08670	0	2186.97	High	5.68	E
FALSE	High	FDGALNVDLTEFQTNLVPYPR		3	7	29	Q71U36; Q9BQE3; P68366	0	2409.21	High	5.68	F
FALSE	High	DLSAAGIGLLAAATQSLSMPASLGR		1	1	6	P43243	0	2371.26	High	5.68	D
FALSE	High	LTTPTYGDLNHLVSATMSGVTTCLR	1xCarbamidomethyl [C23]	2	5	22	P07437; P68371	0	2708.34	High	5.67	L
FALSE	High	LNSNTQVVLLSATMPSDVLEVTK		1	1	10	P60842	0	2459.31	High	5.67	L
FALSE	High	KPVVDCVVSVPCFYTDAER	2xCarbamidomethyl [C6; C12]	1	1	1	P34932	0	2241.07	High	5.67	K
FALSE	High	AGTQIENIDEDFRDGLK		1	1	2	O43707	1	1920.93	High	5.67	A
FALSE	High	VPSTEAEALASSLMGLFEK		1	1	13	P50395	0	1980	High	5.67	V
FALSE	High	LPIDVTEGEVISLGLPFGK		1	1	16	P26599	0	1984.1	High	5.67	L
FALSE	High	DQEVNFQEYVTFLGALALIYNEALK		1	1	2	P06703	0	2888.47	High	5.67	D
FALSE	High	AAEQILEDMITIDVENVMEDICSK	1xCarbamidomethyl [C22]	1	1	1	Q12769	0	2766.29	High	5.67	A
FALSE	High	RPWITGDESIVGLMK		1	1	1	Q16719	0	1701.9	High	5.66	R
FALSE	High	VSPETVDSVIMGNVLQSSSDAIYLAR		1	1	7	P42765	0	2751.39	High	5.65	V
FALSE	High	IAAAGLDVTSPEPLPTNHPLLTLK		1	1	1	Q9UBQ7	0	2468.38	High	5.65	I
FALSE	High	FNDEHIPESPYLVPVIAPSDDAR		1	1	3	O75369	0	2581.26	High	5.65	F
FALSE	High	LQISHEAAACITGLR	1xCarbamidomethyl [C10]	1	1	1	Q08211	0	1639.86	High	5.65	L
FALSE	High	SGPFGQIFRPDNFVFGQSGAGNNWAK		2	5	4	P07437; P68371	0	2798.34	High	5.65	S
FALSE	High	YASICQQNGIVPIVEPEILPDGDHDLK	1xCarbamidomethyl [C5]	2	2	15	P04075; P09972	0	3020.5	High	5.64	Y
FALSE	High	VVETDPSPYCIVAPDTVIHCEGEPIK	2xCarbamidomethyl [C10; C20]	1	1	2	P55072	0	2925.4	High	5.64	V
FALSE	High	FNEEHIPDSPFVVPVASPSGDAR		1	1	3	P21333	0	2467.19	High	5.64	F
FALSE	High	EAHQLFLEPEVLDPESVELK		1	1	4	P39748	0	2322.19	High	5.64	E
FALSE	High	KGVNLPGAAVDLPAVSEK		1	1	3	P14618	1	1764.99	High	5.64	K
FALSE	High	TGVHHYSGNNIELGTACGK	1xCarbamidomethyl [C17]	1	1	5	P62888	0	2014.94	High	5.63	T
FALSE	High	NDPPMEAAGFTAQVIILNHPGQISAGYAPVLDCHTAHIACK	2xCarbamidomethyl [C33; C40]	1	1	2	P68104	0	4385.13	High	5.63	N
FALSE	High	EISFDTMQQELQIGADDVEAFVIDAVR		1	1	1	Q7L2H7	0	3039.46	High	5.62	E
FALSE	High	YPALTKPENQDIDWTLLEGETR		1	1	1	P13797	0	2589.28	High	5.62	Y
FALSE	High	ICDQISDAVLDAHLQQDPDAK	1xCarbamidomethyl [C2]	1	1	2	P31153	0	2352.11	High	5.62	I
FALSE	High	LEGDSTDLSDQIAELQAQIAELK		1	1	6	P35579	0	2487.25	High	5.62	L
FALSE	High	KAEEIANEMIEAAK		1	1	2	P49588	1	1546.78	High	5.62	K
FALSE	High	AGSNMLLIGVHGPTTPCEEVSMK	1xCarbamidomethyl [C17]	1	1	2	O75369	0	2428.17	High	5.62	A
FALSE	High	NVLLDPQLVPGGGASEMAVAHALTEK		1	1	2	P49368	0	2617.37	High	5.61	N
FALSE	High	LDTNSDGQLDFSEFLNLIGGLAMACHDSFLK	1xCarbamidomethyl [C25]	1	1	7	P31949	0	3428.61	High	5.6	L
FALSE	High	ASGATILSTLANLEGEETFEAAMLGQAEEVVQER		1	1	9	P17987	0	3564.74	High	5.6	A
FALSE	High	VGEVCHITCKPEYAYGSAGSPPK	2xCarbamidomethyl [C5; C9]	1	1	1	Q02790	0	2507.17	High	5.6	V
FALSE	High	VFTTQELVQAFTHAPATLEADR		1	1	1	O95433	0	2445.24	High	5.6	V
FALSE	High	NAIDDGCVVPGAGAVEVAMAEALIK	1xCarbamidomethyl [C7]	1	1	10	P40227	0	2470.23	High	5.6	N
FALSE	High	HISQISVAEDDDESLLGHLMIVGK		1	1	1	P49773	0	2606.31	High	5.59	H
FALSE	High	ELQSQISDTSVVLSMDNSR		1	1	6	P05787	0	2109.01	High	5.59	E
FALSE	High	THIQDNHDGTYTVAYVPDVTGR		1	1	3	P21333	0	2459.16	High	5.59	T
FALSE	High	ALESPERPFLAILGGAK		1	1	28	P00558	0	1769	High	5.59	A
FALSE	High	QAVLGAGLPISTPCTTINK	1xCarbamidomethyl [C14]	1	1	1	P24752	0	1941.05	High	5.58	Q
FALSE	High	SINPDEAVAYGAAVQAAILSGDK		1	1	29	P11142	0	2260.15	High	5.58	S
FALSE	High	EQLPPMSEDFLLDALSEDFSGPQNASSLK		1	1	4	P20810	0	3165.49	High	5.57	E
FALSE	High	SGTIFDNFLITNDEAYAEEFGNETWGVTK		1	1	10	P27797	0	3268.5	High	5.57	S
FALSE	High	VEYTPYEEGLHSVDVTYDGSPVPSSPFQVPVTEGCDPSR	1xCarbamidomethyl [C35]	1	1	2	P21333	0	4296.96	High	5.57	V
FALSE	High	RFDEILEASDGIMVAR		1	1	4	P14618	1	1821.92	High	5.57	R
FALSE	High	EFVEEFIWPAIQSSALYEDR		1	1	13	P00966	0	2429.17	High	5.57	E
FALSE	High	TNISDEESEQATEMLVHNAQNLMQSVK		1	1	2	P18206	0	3046.41	High	5.56	T
FALSE	High	SGDAPLTVNELGTAYVSATTGAVATALGLNALTK		1	1	3	Q9H9B4	0	3247.71	High	5.56	S
FALSE	High	VENQENVSNLVIEDTELK		1	1	2	Q01518	0	2073.03	High	5.56	V
FALSE	High	EIVHIQAGQCGNQIGAK	1xCarbamidomethyl [C10]	2	6	8	P07437; P68371	0	1822.92	High	5.56	E
FALSE	High	GFGDGYNGYGGGPGGGNFGGSPGYGGGR		1	1	2	P22626	0	2495.04	High	5.56	G
FALSE	High	FSFSGNTLVSSSADPEGHFETPIWIER		1	1	4	Q14697	0	3010.42	High	5.56	F
FALSE	High	LASGETVAAFCLTEPSSGSDAASIR	1xCarbamidomethyl [C11]	1	1	2	P49748	0	2497.19	High	5.55	L
FALSE	High	QTMQVDEHARPQTTLEQLQK		1	1	1	P42765	0	2381.19	High	5.55	Q
FALSE	High	SGDAAIVDMVPGKPMCVESFSDYPPLGR	1xCarbamidomethyl [C16]	1	2	14	P68104	0	2995.4	High	5.55	S
FALSE	High	SDIDEVALQGIEFWSNVCDEEMDLAIEASEAAEQGRPPEHTSK	1xCarbamidomethyl [C18]	1	1	3	Q14974	0	4803.17	High	5.55	S
FALSE	High	IFCCHGGLSPDLQSMEQIR	2xCarbamidomethyl [C3; C4]	2	3	1	P62136; P62140	0	2248.03	High	5.55	I
FALSE	High	NMDPLNDNIATLLHQSSDK		1	1	2	P35579	0	2126.02	High	5.55	N
FALSE	High	QEDVSVQLEALDIMADMLSR		1	1	2	Q86VP6	0	2263.09	High	5.55	Q
FALSE	High	SYDVPPPPMEPDHPFYSNISK		1	2	6	P18669	0	2417.11	High	5.55	S
FALSE	High	AKPSPAPPSTTTAPDASGPQK		1	1	1	P40855	0	2006.02	High	5.54	A
FALSE	High	EALDHMVEYVAQNTPVTWLVGPFAPGITEK		1	1	6	O60664	0	3312.66	High	5.54	E
FALSE	High	GLQAQIASSGLTVEVDAPK		1	1	3	P05783	0	1884.01	High	5.54	G
FALSE	High	ERVEAVNMAEGIIHDTETK		1	1	2	P38646	1	2142.05	High	5.54	E
FALSE	High	EELGLIEQAYDNPHEALSR		1	1	1	Q6P2Q9	0	2184.06	High	5.54	E
FALSE	High	TVPPAVTGITFLSGGQSEEEASINLNAINK		1	1	22	P04075	0	3057.57	High	5.54	T
FALSE	High	HNEETGDNVGPLIIK		1	1	2	Q9NZ45	0	1635.83	High	5.54	H
FALSE	High	GHYTEGAELVDSVLDVVR		2	5	25	P07437; P68371	0	1958.98	High	5.54	G
FALSE	High	ALEAFDLDPAQWGVNVQPYSGSPANLAVYTALLQPHDR		1	1	2	P34897	0	4124.05	High	5.54	A
FALSE	High	VHSPSGAVEECHVSELEPDK	1xCarbamidomethyl [C11]	1	1	3	O75369	0	2206.01	High	5.53	V
FALSE	High	YTPSGQAGAAASESLFVSNHAY		1	1	4	P04075	0	2228.03	High	5.53	Y
FALSE	High	QRQEEPPPGPQRPDQSAAAAGPGDPK		1	1	1	Q9BQ61	1	2681.3	High	5.53	Q
FALSE	High	AVTLHDQGTAQWADLSSQFYLR		1	1	1	P22314	0	2507.23	High	5.53	A
FALSE	High	LMEPIYLVEIQCPEQVVGGIYGVLNR	1xCarbamidomethyl [C12]	1	1	6	P13639	0	2989.55	High	5.52	L
FALSE	High	ITAQSIEELCAVNLYGPDAQVDR	1xCarbamidomethyl [C10]	1	1	1	P78527	0	2562.25	High	5.52	I
FALSE	High	SNTGGQAFPQCVFDHWQILPGDPFDNSSRPSQVVAETR	1xCarbamidomethyl [C11]	1	1	20	P13639	0	4244.98	High	5.52	S
FALSE	High	LGGSPTSLGTWGSWIGPDHDK		1	1	1	P14314	0	2168.04	High	5.52	L
FALSE	High	HTGCCGDNDPIDVCEIGSK	3xCarbamidomethyl [C4; C5; C14]	1	1	3	Q15181	0	2133.86	High	5.52	H
FALSE	High	RPTPQDSPIFLPVDDTSFR		1	1	2	P49327	0	2188.1	High	5.52	R
FALSE	High	KYEDICPSTHNMDVPNIK	1xCarbamidomethyl [C6]	1	3	3	P63241	1	2161.01	High	5.52	K
FALSE	High	QILLGIQELLNEPNIQDPAQAEAYTIYCQNR	1xCarbamidomethyl [C28]	1	1	3	P63279	0	3615.81	High	5.51	Q
FALSE	High	NLNEDTTFLPFTLQELGGLPEDFLNSLEK		1	1	1	P52888	0	3294.64	High	5.51	N
FALSE	High	ELPTEPPYTAYVGNLPFNTVQGDIDAIFK		1	1	4	Q15056	0	3209.6	High	5.51	E
FALSE	High	ALLELQLEPEELYQTFQR		1	1	18	P13639	0	2220.15	High	5.51	A
FALSE	High	HLEINPDHSIIETLR		1	1	7	P07900	0	1786.94	High	5.51	H
FALSE	High	GFQQILAGEYDHLPEQAFYMVGPIEEAVAK		1	1	13	P06576	0	3350.64	High	5.5	G
FALSE	High	IITITGTQDQIQNAQYLLQNSVK		1	1	14	P61978	0	2589.39	High	5.5	I
FALSE	High	SSEHINEGETAMLVCK	1xCarbamidomethyl [C15]	1	1	3	P35613	0	1804.82	High	5.49	S
FALSE	High	LPESENLQEFWDNLIGGVDMVTDDDRR		1	1	3	P49327	1	3163.46	High	5.49	L
FALSE	High	LEQQVPVNQVFGQDEMIDVIGVTK		1	1	11	P39023	0	2686.38	High	5.49	L
FALSE	High	LPGGELNPGEDEVEGLK		1	1	2	O43809	0	1752.87	High	5.49	L
FALSE	High	VEGDTCSLNEFTITGSTYAPIGEVHK	1xCarbamidomethyl [C6]	1	1	1	P16615	0	2825.33	High	5.49	V
FALSE	High	ALMLQGVDLLADAVAVTMGPK		1	1	18	P10809	0	2113.14	High	5.48	A
FALSE	High	TPALIVYGDQDPMGQTSFEHLK		1	1	1	Q96IU4	0	2447.19	High	5.48	T
FALSE	High	AENNSEVGASGYGVPGPTWDR		1	1	1	Q08211	0	2162.97	High	5.48	A
FALSE	High	APLATGEDDDDEVPDLVENFDEASK		1	1	2	P20290	0	2691.18	High	5.48	A
FALSE	High	NADMSEEMQQDSVECATQALEK	1xCarbamidomethyl [C15]	1	1	3	P63167	0	2514.04	High	5.47	N
FALSE	High	LEGDLTGPSVGVEVPDVELECPDAK	1xCarbamidomethyl [C21]	1	1	3	Q09666	0	2625.26	High	5.47	L
FALSE	High	VVVVDDLLATGGTMNAACELLGR	1xCarbamidomethyl [C18]	1	1	3	P07741	0	2374.21	High	5.47	V
FALSE	High	AAVPSGASTGIYEALELR		1	3	49	P06733	0	1804.94	High	5.47	A
FALSE	High	IGGVQQDTILAEGLHFR		1	1	2	Q99623	0	1853.99	High	5.47	I
FALSE	High	EDAPIGPHLQSMPSEQIR		1	1	1	Q14152	0	2004.98	High	5.47	E
FALSE	High	TTHFVEGGDAGNREDQINR		1	1	5	P18124	1	2115.98	High	5.46	T
FALSE	High	MQDLDEDATLTQLATAWVSLATGGEK		1	1	7	O14579	0	2764.33	High	5.46	M
FALSE	High	YGGPPPDSVYSGQQPSVGTEIFVGK		1	1	3	O60506	0	2566.25	High	5.46	Y
FALSE	High	FGTVLTEHVAAAELGAR		1	1	1	O43598	0	1741.92	High	5.46	F
FALSE	High	NQAFIEMNTEEAANTMVNYYTSVTPVLR		1	1	8	P26599	0	3206.51	High	5.45	N
FALSE	High	YGAVDPLLALLAVPDMSSLACGYLR	1xCarbamidomethyl [C21]	1	1	3	P52292	0	2665.37	High	5.45	Y
FALSE	High	QTQTFTTYSDNQPGVLIQVYEGER		1	1	6	P11142	0	2774.33	High	5.45	Q
FALSE	High	IMQSSSEVGYDAMAGDFVNMVEK		1	1	11	P10809	0	2508.11	High	5.44	I
FALSE	High	LGGTIDDCELVEGLVLTQK	1xCarbamidomethyl [C8]	1	1	3	P50991	0	2060.06	High	5.44	L
FALSE	High	TAFDEAIAELDTLNEESYK		1	1	15	P31946	0	2159	High	5.44	T
FALSE	High	VVQVSAGDSHTAALTDDGR		1	1	2	P18754	0	1898.92	High	5.43	V
FALSE	High	ALDLFSDNAPPPELLEIINEDIAK		1	1	13	Q15084	0	2637.37	High	5.43	A
FALSE	High	SVVPGGGAVEAALSIYLENYATSMGSR		1	1	4	P17987	0	2699.33	High	5.43	S
FALSE	High	HSGNITFDEIVNIAR		1	1	3	P30050	0	1685.86	High	5.42	H
FALSE	High	YDGSTIVPGEQGAEYQHFIQQCTDDVR	1xCarbamidomethyl [C22]	1	1	2	Q14019	0	3113.39	High	5.42	Y
FALSE	High	EGRPSGEAFVELESEDEVK		1	1	1	P31943	0	2106.98	High	5.42	E
FALSE	High	SVVLMSHLGRPDGVPMPDK		1	1	5	P00558	0	2035.05	High	5.42	S
FALSE	High	HSMNPFCEIAVEEAVR	1xCarbamidomethyl [C7]	1	1	1	P38117	0	1888.87	High	5.42	H
FALSE	High	LEGVLAEVAQHYQDTLIR		1	1	2	P46940	0	2055.09	High	5.42	L
FALSE	High	CLAFHDISPQAPTHFLVIPK	1xCarbamidomethyl [C1]	1	1	9	P49773	0	2291.2	High	5.42	C
FALSE	High	NDFQLIGIQDGYLSLLQDSGEVR		1	1	13	P63241	0	2580.29	High	5.41	N
FALSE	High	QFIDSNPNQPLVILEMESGASAK		1	1	1	P49588	0	2488.24	High	5.41	Q
FALSE	High	ILQEYVEHQVDDAMMANAAQK		1	1	2	P08243	0	2404.13	High	5.41	I
FALSE	High	KPLPDHVSIVEPK		1	1	4	P23396	0	1458.83	High	5.4	K
FALSE	High	AGAAPYVQAFDSLLAGPVAEYLK		1	1	3	Q01518	0	2351.23	High	5.4	A
FALSE	High	IIENAENEYQTAISENYQTMSDTTFK		1	1	1	P52907	0	3040.37	High	5.4	I
FALSE	High	MDALQLANSAFAVDLFK	1xAcetyl [N-Term]	1	1	11	P36952	0	1895.96	High	5.4	M
FALSE	High	SVNESLNNLFITEEDYQALR		1	1	4	Q00610	0	2355.15	High	5.4	S
FALSE	High	LFAQLAGDDMEVSATELMNILNK		1	1	4	P04632	0	2523.25	High	5.39	L
FALSE	High	ATAPVPTVGEGYGYGHESELSQASAAAR		1	1	1	Q9BWF3	0	2776.32	High	5.39	A
FALSE	High	LGVNNISGIEEVNMFTNQGTVIHFNNPK		1	1	2	P20290	0	3086.54	High	5.39	L
FALSE	High	HLLSLMGIPYLDAPSEAEASCAALVK	1xCarbamidomethyl [C21]	1	1	7	P39748	0	2756.4	High	5.38	H
FALSE	High	VTYHPDGPEGQAYDVDFTPPFR		1	1	1	Q15046	0	2508.15	High	5.38	V
FALSE	High	EELQSGVDAANSAAQQYQR		1	1	2	P46940	0	2064.96	High	5.38	E
FALSE	High	DELHIVEAEAMNYEGSPIK		1	1	15	P06748	0	2145.02	High	5.37	D
FALSE	High	EVEAVIPDHCIFASNTSALPISEIAAVSK	1xCarbamidomethyl [C10]	1	1	2	P40939	0	3068.56	High	5.37	E
FALSE	High	QGGDVLQNEEGETTSHLMGMFYR		1	1	1	P39748	0	2599.16	High	5.37	Q
FALSE	High	GDVAEGDLIEHFSQFGTVEK		1	1	2	Q13151	0	2178.03	High	5.37	G
FALSE	High	EIYCPAPPQIDNGIIQGER	1xCarbamidomethyl [C4]	1	1	6	P08174	0	2170.06	High	5.37	E
FALSE	High	IAIPGLAGAGNSVLLVSNLNPER		1	1	7	P26599	0	2275.28	High	5.36	I
FALSE	High	GPQLFHMDPSGTFVQCDAR	1xCarbamidomethyl [C16]	1	1	2	P28066	0	2162.97	High	5.36	G
FALSE	High	HLEINPDHPIVETLR		1	1	9	P08238	0	1782.95	High	5.36	H
FALSE	High	VFSWLQQEGHLSEEEMAR		1	1	1	P22102	0	2176.01	High	5.35	V
FALSE	High	VTSVVFHPSQDLVFSASPDATIR		1	1	1	Q9UMS4	0	2473.27	High	5.35	V
FALSE	High	ICELLPEAAINDVYLAPLLQCLIEGLSAEPR	2xCarbamidomethyl [C2; C21]	1	1	1	Q14974	0	3480.81	High	5.35	I
FALSE	High	MHDLNTDQENLVGTHDAPIR		1	1	1	O43684	0	2276.07	High	5.35	M
FALSE	High	DPAEGDGAQPEETPR		1	1	1	Q14697	0	1568.68	High	5.35	D
FALSE	High	APQETYADIGGLDNQIQEIK		1	1	1	P62191	0	2203.09	High	5.35	A
FALSE	High	AQFAQPEILIGTIPGAGGTQR		1	1	3	P30084	0	2125.14	High	5.34	A
FALSE	High	WQHDLFDSGFGGGAGVETGGK		1	1	1	Q86V81	0	2121.96	High	5.34	W
FALSE	High	SADESGQALLAAGHYASDEVR		1	1	1	Q13813	0	2147	High	5.34	S
FALSE	High	GYQLSDVDGVTCEDIDECALPTGGHICSYR	3xCarbamidomethyl [C12; C18; C27]	1	1	1	P23142	0	3387.46	High	5.34	G
FALSE	High	VATAQDDITGDGTTSNVLIIGELLK		1	1	3	P40227	0	2544.34	High	5.34	V
FALSE	High	SAAPGSLGYQWLSDGSGVFEIAEASGVR		1	1	3	Q12931	0	2811.36	High	5.34	S
FALSE	High	FVSSSSSGAYGGGYGGVLTASDGLLAGNEK		1	1	1	P08727	0	2808.33	High	5.33	F
FALSE	High	MDVLAEANGTFALNLLK	1xAcetyl [N-Term]	1	1	4	P35237	0	1861.97	High	5.32	M
FALSE	High	SHFEQWGTLTDCVVMR	1xCarbamidomethyl [C12]	1	2	2	P09651	0	1965.89	High	5.32	S
FALSE	High	ETGANLAICQWGFDDEANHLLLQNNLPAVR	1xCarbamidomethyl [C9]	1	1	2	P48643	0	3379.65	High	5.31	E
FALSE	High	VYGSFLVNPESGYNVSLLYDLENLPASK		1	1	4	O15144	0	3088.55	High	5.31	V
FALSE	High	QLTEMLPSILNQLGADSLTSLR		1	1	11	P20290	0	2400.28	High	5.31	Q
FALSE	High	GIVDQSQQAYQEAFEISK		1	1	6	P63104	0	2040.99	High	5.31	G
FALSE	High	LVEALCAEHQINLIK	1xCarbamidomethyl [C6]	1	1	5	P25398	0	1750.95	High	5.31	L
FALSE	High	LGEINVIGEPFLNVNCEHIK	1xCarbamidomethyl [C16]	1	1	1	P33991	0	2295.18	High	5.3	L
FALSE	High	TELEDTLDSTAAQQELR		1	1	2	P35579	0	1919.92	High	5.3	T
FALSE	High	TGQATVASGIPAGWMGLDCGPESSK	1xCarbamidomethyl [C19]	1	1	7	P00558	0	2477.14	High	5.3	T
FALSE	High	GAAAAATGQPGTAPAGTPGAPPLAGMAIVK		1	1	2	Q13263	0	2572.36	High	5.3	G
FALSE	High	YVEPIEDVPCGNIVGLVGVDQFLVK	1xCarbamidomethyl [C10]	1	1	16	P13639	0	2759.43	High	5.3	Y
FALSE	High	GLLSDSMTDVPVDTGVAAR		1	1	1	O43399	0	1903.94	High	5.3	G
FALSE	High	YGDGGSTFQSTTGHCVHMR	1xCarbamidomethyl [C15]	1	1	1	P31943	0	2097.89	High	5.3	Y
FALSE	High	GPAVGIDLGTTYSCVGVFQHGK	1xCarbamidomethyl [C14]	1	1	1	P11142	0	2263.12	High	5.3	G
FALSE	High	HGLLVPNNTTDQELQHIR		1	1	2	P56537	0	2085.08	High	5.29	H
FALSE	High	VEEQEPELTSTPNFVVEVIK		1	1	5	Q07021	0	2287.17	High	5.29	V
FALSE	High	IVSRPEELREDDVGTGAGLLEIK		1	1	3	P49368	1	2496.33	High	5.28	I
FALSE	High	NQQITHANNTVSNFK		1	1	2	Q92598	0	1715.85	High	5.28	N
FALSE	High	CAPGVVGPAEADIDFDIIR	1xCarbamidomethyl [C1]	1	1	4	P21333	0	2014.99	High	5.28	C
FALSE	High	SINPLGGFVHYGEVTNDFVMLK		1	1	6	P39023	0	2437.22	High	5.28	S
FALSE	High	ESTGAQVQVAGDMLPNSTER		2	3	5	Q15366; Q15365	0	2089.98	High	5.28	E
FALSE	High	ITLPVDFVTADKFDENAK		1	1	1	P00558	1	2023.04	High	5.27	I
FALSE	High	AAELIANSLATAGDGLIELR		1	1	2	P35232	0	1998.09	High	5.27	A
FALSE	High	APKPDGPGGGPGGSHMGGNYGDDR	1xOxidation [M16]	1	1	5	P35637	0	2268.97	High	5.27	A
FALSE	High	AAAAAAAAAPAAAATAPTTAATTAATAAQ		1	1	3	P37108	0	2368.21	High	5.27	A
FALSE	High	TQDQDENVALEACEFWLTLAEQPICK	2xCarbamidomethyl [C13; C25]	1	1	5	Q92973	0	3108.43	High	5.26	T
FALSE	High	YALQMEQLNGILLHLESELAQTR		1	1	5	P05783	0	2670.39	High	5.26	Y
FALSE	High	GEETPVIVGSALCALEGRDPELGLK	1xCarbamidomethyl [C13]	1	1	1	P49411	1	2610.34	High	5.26	G
FALSE	High	AQTEGINISEEALNHLGEIGTK		1	1	1	Q9Y265	0	2324.17	High	5.25	A
FALSE	High	MPPYDEQTQAFIDAAQEAR		1	1	5	P14314	0	2180.99	High	5.25	M
FALSE	High	IPVIENLGATLDQFDAIDFSDNEIR		1	1	4	P09661	0	2805.39	High	5.25	I
FALSE	High	APEQEQAAPGPAAGGEAPK		1	1	4	P80723	0	1775.86	High	5.25	A
FALSE	High	VAILVDDMADTCGTICHAADK	2xCarbamidomethyl [C12; C16]	1	2	2	P60891	0	2276.04	High	5.25	V
FALSE	High	VAEEHAPSIVFIDEIDAIGTK		1	1	1	P62191	0	2254.16	High	5.25	V
FALSE	High	IVSLFAEHNDLQYAAPGGLIGVGTK		1	2	1	P41091	0	2570.36	High	5.25	I
FALSE	High	IVHELNTTVPTASFAGK		1	1	1	Q4VC31	0	1784.95	High	5.25	I
FALSE	High	NLSDLIDLVPSLCEDLLSSVDQPLK	1xCarbamidomethyl [C13]	1	1	4	P47756	0	2783.44	High	5.25	N
FALSE	High	ASVHTLSGHTNAVATVR		1	1	2	O43660	0	1720.91	High	5.24	A
FALSE	High	RGFGFVTFDDHDPVDK		1	1	4	P22626	1	1851.87	High	5.24	R
FALSE	High	LVSPGSANETSSILVESVTR		1	1	4	O75369	0	2046.07	High	5.24	L
FALSE	High	AGLGSGLSLSGLVHPELSR		1	1	1	P49748	0	1850.01	High	5.24	A
FALSE	High	VPPAINQFTQALDR		1	1	7	P62424	0	1569.84	High	5.24	V
FALSE	High	KLDEAVAEAHLGK		1	1	3	P23526	1	1380.75	High	5.24	K
FALSE	High	CELSSSVQTDINLPYLTMDSSGPK	1xCarbamidomethyl [C1]	1	1	1	P38646	0	2642.23	High	5.23	C
FALSE	High	LGGLTQAPGNPVLAVQINQDK		1	1	2	P26368	0	2133.17	High	5.23	L
FALSE	High	LYQSAGGMPGGMPGGFPGGGAPPSGGASSGPTIEEVD		1	1	6	P11142	0	3346.5	High	5.23	L
FALSE	High	ECPSDECGAGVFMASHFDR	2xCarbamidomethyl [C2; C7]	1	1	3	P62979	0	2171.86	High	5.23	E
FALSE	High	VYNVTQHAVGIVVNK		1	1	3	P46778	0	1640.91	High	5.23	V
FALSE	High	YLLQYQEPIPCEQLVTALCDIK	2xCarbamidomethyl [C11; C19]	1	1	9	P25789	0	2694.35	High	5.23	Y
FALSE	High	TDAPQPDVKEEEEEKEEEK		1	1	2	P27824	2	2259.01	High	5.23	T
FALSE	High	TAFDEAIAELDTLNEDSYK		1	1	19	P27348	0	2144.99	High	5.23	T
FALSE	High	FGGQLLSFDIGDQPVFEIPLSNVSQCTTGK	1xCarbamidomethyl [C26]	1	1	4	Q08945	0	3254.6	High	5.23	F
FALSE	High	GQELAFPLSPDWQVDYESYTWR		1	1	4	P26641	0	2687.24	High	5.22	G
FALSE	High	GWTGQESLSDSDPEMWELLQR		1	1	1	P34897	0	2464.11	High	5.22	G
FALSE	High	VLDNYLTSPLPEEVDETSAEDEGVSQR		1	1	5	O00299	0	2992.39	High	5.22	V
FALSE	High	IQDALSTVLQYAEDVLSGK		1	1	4	O00303	0	2050.07	High	5.22	I
FALSE	High	SLQENEEEEIGNLELAWDMLDLAK		1	1	5	P49321	0	2789.32	High	5.22	S
FALSE	High	LSLEGDHSTPPSAYGSVK		1	2	9	P07355	0	1844.9	High	5.22	L
FALSE	High	VDIDVPDVNVQGPDWHLK		1	1	1	Q09666	0	2046.03	High	5.22	V
FALSE	High	TVLMNPNIASVQTNEVGLK		1	1	4	P31327	0	2028.08	High	5.22	T
FALSE	High	IIYLNQLLQEDSLNVADLTSLR		1	1	4	Q9UL46	0	2531.37	High	5.21	I
FALSE	High	GGPPFAFVEFEDPRDAEDAVYGR		1	1	2	Q07955	1	2541.17	High	5.21	G
FALSE	High	ALGLGVEQLPVVFEDVVLHQATILPK		1	1	5	P49327	0	2785.59	High	5.21	A
FALSE	High	YAPTEAQLNAVDALIDSMSLAK		1	1	14	P13010	0	2321.17	High	5.21	Y
FALSE	High	FNAHGDANTIVCNSK	1xCarbamidomethyl [C12]	1	1	4	P09382	0	1647.75	High	5.21	F
FALSE	High	GHNGWVTQIATTPQFPDMILSASR		1	1	1	P63244	0	2627.3	High	5.21	G
FALSE	High	IPEINSSDMSAHVTSPSGR		1	1	2	O75369	0	1984.94	High	5.21	I
FALSE	High	RDAEDAMDAMDGAVLDGR		1	1	1	Q01130	1	1907.82	High	5.2	R
FALSE	High	NDQDTWDYTNPNLSGQGDPGSNPNK		1	1	1	P14866	0	2734.16	High	5.2	N
FALSE	High	EQYEQILAFVQGTVAEGAPIIPISAQLK		1	2	8	P41091	0	3013.62	High	5.2	E
FALSE	High	HPHDIIDDINSGAVECPAS	1xCarbamidomethyl [C16]	1	1	5	P30050	0	2046.92	High	5.2	H
FALSE	High	ETIELVHTEPTDVAQLPSR		1	1	1	Q6IBS0	0	2135.1	High	5.2	E
FALSE	High	LFQVSTLDAALSGTLSGVEGFTSQEDQEMLSR		1	1	3	P33992	0	3416.65	High	5.19	L
FALSE	High	TVYGGGCSEMLMAHAVTQLANR	1xCarbamidomethyl [C7]	1	1	1	P78371	0	2366.1	High	5.19	T
FALSE	High	DDQVTVIGAGVTLHEALAAAELLK		1	1	3	P29401	0	2434.32	High	5.19	D
FALSE	High	DLSHIGDAVVISCAK	1xCarbamidomethyl [C13]	1	1	4	P12004	0	1584.81	High	5.19	D
FALSE	High	TQLEELEDELQATEDAK		1	3	2	P35579	0	1961.92	High	5.19	T
FALSE	High	DAGEGLLAVQITDQEGKPK		1	1	2	O75369	0	1969.02	High	5.19	D
FALSE	High	EVEEISLLQPQVEESVLNLGK		1	1	2	O00567	0	2353.25	High	5.19	E
FALSE	High	MMCGAPSATQPATAETQHIADQVR	1xAcetyl [N-Term]; 1xCarbamidomethyl [C3]	1	1	3	P04080	0	2613.19	High	5.19	M
FALSE	High	QGSGSSQPMEVQEGYGFGSGDDPYSSAEPHVSGVK		1	1	1	Q13263	0	3557.54	High	5.19	Q
FALSE	High	EDIDAAIETYNLLSER		1	1	2	P23921	0	1851.9	High	5.18	E
FALSE	High	EEFASTCPDDEEIELAYEQVAK	1xCarbamidomethyl [C7]	1	1	7	O00299	0	2573.12	High	5.18	E
FALSE	High	VLHEAEGHIVTCETNTGEVYR	1xCarbamidomethyl [C12]	1	1	1	P62318	0	2414.14	High	5.18	V
FALSE	High	VQGGALEDSQLVAGVAFK		1	1	1	Q99832	0	1788.95	High	5.18	V
FALSE	High	KHEAFESDLAAHQDR		2	3	4	P12814; O43707	1	1753.83	High	5.18	K
FALSE	High	IDQLEGDHQLIQEALIFDNK		1	1	1	P12814	0	2339.19	High	5.18	I
FALSE	High	QQLSAEELDAQLDAYNAR		1	1	3	Q86V81	0	2034.97	High	5.18	Q
FALSE	High	REEEEFNTGPLSVLTQSVK		1	1	3	P62316	1	2163.09	High	5.18	R
FALSE	High	FVHLLDQSDQDFQEELDLMK		1	1	2	P46940	0	2450.15	High	5.18	F
FALSE	High	MQVDQEEPHVEEQQQQTPAENK		1	1	1	P34932	0	2622.17	High	5.18	M
FALSE	High	GQLTTDQVFPYPSVLNEEQTQFLK		1	1	1	P49748	0	2782.39	High	5.17	G
FALSE	High	VFIMDSCDELIPEYLNFIR	1xCarbamidomethyl [C7]	1	1	12	P08238	0	2374.15	High	5.17	V
FALSE	High	FITHAPPGEFNEVFNDVR		1	1	1	P52907	0	2089.01	High	5.17	F
FALSE	High	CEMASTGEVACFGEGIHTAFLK	2xCarbamidomethyl [C1; C11]	1	1	1	P31327	0	2415.08	High	5.17	C
FALSE	High	AASADSTTEGTPADGFTVLSTK		1	1	3	O75367	0	2127.01	High	5.17	A
FALSE	High	GQCDLELINVCNENSLFK	2xCarbamidomethyl [C3; C11]	1	1	3	Q00610	0	2153	High	5.17	G
FALSE	High	EFGAGPLFNQILPLLMSPTLEDQER		1	1	3	O75533	0	2815.43	High	5.17	E
FALSE	High	EGGLGPLNIPLLADVTR		1	1	18	P32119	0	1734.97	High	5.17	E
FALSE	High	QEDKDDLDVTELTNEDLLDQLVK		2	2	2	P42167; P42166	1	2688.31	High	5.17	Q
FALSE	High	LDNYDAPDIANIAISNELFEEAFAIFR		1	1	1	Q00610	0	3071.5	High	5.16	L
FALSE	High	VEDMAELTCLNEASVLHNLK	1xCarbamidomethyl [C9]	1	2	2	P35579	0	2286.11	High	5.16	V
FALSE	High	FGQGGAGPVGGQGPR		1	1	2	P23246	0	1341.67	High	5.16	F
FALSE	High	NVGCLQEALQLATSFAQLR	1xCarbamidomethyl [C4]	1	1	5	P49588	0	2119.1	High	5.16	N
FALSE	High	TSSAQVEGGVHSLHSYEK		1	1	2	P12268	0	1915.91	High	5.16	T
FALSE	High	FTASAGIQVVGDDLTVTNPK		1	1	15	P06733	0	2033.05	High	5.16	F
FALSE	High	EPDVLILDEPTNNLDIESIDALGEAINEYK		1	1	2	Q8NE71	0	3342.65	High	5.16	E
FALSE	High	VHIPNDDAQFDASHCDSDK	1xCarbamidomethyl [C15]	1	1	2	Q16576	0	2170.91	High	5.15	V
FALSE	High	VDCTAHSDVCSAQGVR	2xCarbamidomethyl [C3; C10]	1	1	2	Q8NBS9	0	1761.76	High	5.15	V
FALSE	High	DGPLNMILDDGGDLTNLIHTK		1	1	10	P23526	0	2252.12	High	5.15	D
FALSE	High	MAAISESNINLCGSHCGVSIGEDGPSQMALEDLAMFR	2xCarbamidomethyl [C12; C16]	1	1	15	P29401	0	3967.78	High	5.15	M
FALSE	High	YAVDDVPFSIPAASEIADLSNIINK		1	1	2	Q9GZL7	0	2662.36	High	5.15	Y
FALSE	High	LGQSDPAPLQHQMDIYQK		1	1	5	P29401	0	2069.01	High	5.15	L
FALSE	High	YHTSQSGDEMTSLSEYVSR		1	1	5	P08238	0	2176.95	High	5.14	Y
FALSE	High	LISLTDENALSGNEELTVK		1	1	2	P14625	0	2046.06	High	5.14	L
FALSE	High	VETELQGVCDTVLGLLDSHLIK	1xCarbamidomethyl [C9]	1	1	10	P31947	0	2439.28	High	5.14	V
FALSE	High	ILGQEGDASYLASEISTWDGVIVTPSEK		1	1	1	Q12905	0	2965.47	High	5.14	I
FALSE	High	VTASGPGLSSYGVPASLPVDFAIDAR		1	1	8	O75369	0	2547.31	High	5.14	V
FALSE	High	TISSSLAVVDLIDAIQPGCINYDLVK	1xCarbamidomethyl [C19]	1	1	3	P13797	0	2804.48	High	5.14	T
FALSE	High	AAAPAPEEEMDECEQALAAEPK	1xCarbamidomethyl [C13]	1	1	6	P26641	0	2357.03	High	5.14	A
FALSE	High	GTQGATAGASSELDASK		1	1	1	O76094	0	1550.73	High	5.14	G
FALSE	High	GLGAGAGAGEESPATSLPR		1	1	1	O15173	0	1697.85	High	5.13	G
FALSE	High	KPGMFFNPEESELDLTYGNR		1	1	1	P11413	0	2344.09	High	5.13	K
FALSE	High	ELLNPVVEFVSHPSTTCR	1xCarbamidomethyl [C17]	1	1	2	P78527	0	2085.04	High	5.13	E
FALSE	High	CIQMWFDPAQGNPNEEVAR	1xCarbamidomethyl [C1]	1	1	4	P15328	0	2262.01	High	5.13	C
FALSE	High	YTPTQQGNMQVLVTYGGDPIPK		1	1	1	O75369	0	2407.2	High	5.13	Y
FALSE	High	ITAFVPNDGCLNFIEENDEVLVAGFGR	1xCarbamidomethyl [C10]	1	1	6	P62266	0	2996.45	High	5.13	I
FALSE	High	GVDLDQLLDMSYEQLMQLYSAR		1	1	10	P62841	0	2588.24	High	5.13	G
FALSE	High	VAHALAEGLGVIACIGEK	1xCarbamidomethyl [C14]	1	1	3	P60174	0	1807.97	High	5.13	V
FALSE	High	ELEAVCQDVLSLLDNYLIK	1xCarbamidomethyl [C6]	1	1	11	P61981	0	2235.16	High	5.13	E
FALSE	High	DLLLTSSYLSDSGSTGEHTK		1	1	3	P08195	0	2111.01	High	5.13	D
FALSE	High	NRPTSISWDGLDSGK		1	1	4	P30086	0	1632.8	High	5.13	N
FALSE	High	VHAELADVLTEAVVDSILAIK		1	1	12	P40227	0	2206.23	High	5.12	V
FALSE	High	QTSGGPVDASSEYQQELER		1	1	2	P18859	0	2080.94	High	5.12	Q
FALSE	High	DPTVHDDVLELEMDELNR		1	1	2	P78527	0	2139.99	High	5.12	D
FALSE	High	GQVGGEINVEMDAAPGVDLSR		1	1	2	Q04695	0	2114.02	High	5.12	G
FALSE	High	ISLGLPVGAVINCADNTGAK	1xCarbamidomethyl [C13]	1	1	7	P62829	0	1970.04	High	5.11	I
FALSE	High	CPNLTHLNLSGNK	1xCarbamidomethyl [C1]	1	1	3	P39687	0	1467.74	High	5.11	C
FALSE	High	LGQHVVGMAPLSVGSLDDEPGGEAETK		1	1	1	P43897	0	2693.31	High	5.11	L
FALSE	High	AAFDDAIAELDTLSEESYK		1	1	24	P62258	0	2087.97	High	5.11	A
FALSE	High	HSQAVEELAEQLEQTK		1	1	1	P35579	0	1839.91	High	5.11	H
FALSE	High	MREDYDSVEQDGDEPGPQR		1	1	1	Q9Y5S9	1	2222.93	High	5.11	M
FALSE	High	DNFWEMGDTGPCGPCSEIHYDR	2xCarbamidomethyl [C12; C15]	1	1	1	P49588	0	2643.03	High	5.11	D
FALSE	High	GHVDILAPTVQELAALEK		1	1	1	Q92499	0	1904.05	High	5.11	G
FALSE	High	EAILNDEIYCPPETAVLLASYAVQAK	1xCarbamidomethyl [C10]	1	1	2	P35241	0	2878.45	High	5.11	E
FALSE	High	SMEAEMIQLQEELAAAER		1	1	3	P35579	0	2048.96	High	5.11	S
FALSE	High	SSGGREDLESSGLQR		1	1	1	Q9UK76	1	1577.75	High	5.1	S
FALSE	High	EGTDSSQGIPQLVSNISACQVIAEAVR	1xCarbamidomethyl [C19]	1	1	2	Q99832	0	2829.4	High	5.1	E
FALSE	High	NQDLAPNSAEQASILSLVTK		1	1	2	Q12905	0	2099.1	High	5.1	N
FALSE	High	MDPFLVLLHSVSSSLSSSELTELK	1xAcetyl [N-Term]	1	1	1	Q13158	0	2661.37	High	5.09	M
FALSE	High	IIGVDPEGSILAEPEELNQTEQTTYEVEGIGYDFIPTVLDR		1	1	2	P0DN79	0	4550.23	High	5.09	I
FALSE	High	EPPPEFEFIADPPSISAFDLDVVK		1	1	4	Q15459	0	2659.32	High	5.09	E
FALSE	High	NTNDANSCQIIIPQNQVNR	1xCarbamidomethyl [C8]	2	2	2	P31150; P50395	0	2199.06	High	5.09	N
FALSE	High	QTIDNSQGAYQEAFDISK		1	1	3	P27348	0	2014.94	High	5.09	Q
FALSE	High	DQVTAQEIFQDNHEDGPTAK		1	1	2	P13010	0	2243.02	High	5.09	D
FALSE	High	QIWTLEQPPDEAGSAAVCLR	1xCarbamidomethyl [C18]	1	1	1	Q16658	0	2241.1	High	5.09	Q
FALSE	High	MIQTPDADLDVTNIIQADEPTTLTTNALDLNSVLGK		1	1	2	Q13155	0	3840.94	High	5.09	M
FALSE	High	SEMESVLAQLDNYGQQELADLFVNYNVK		1	1	6	P41250	0	3217.54	High	5.09	S
FALSE	High	THEAEIVEGENHTYCIR	1xCarbamidomethyl [C15]	1	1	2	P21333	0	2057.93	High	5.09	T
FALSE	High	GFGYAEFEDLDSLLSALSLNEESLGNR		1	1	3	P23588	0	2946.4	High	5.08	G
FALSE	High	SGPPGEEAQVASQFIADVIENSQIIQK		1	1	3	Q96B26	0	2855.44	High	5.08	S
FALSE	High	GFEVVYMTEPIDEYCVQQLK	1xCarbamidomethyl [C15]	1	1	5	P08238	0	2448.15	High	5.08	G
FALSE	High	VGINYQPPTVVPGGDLAK		3	7	13	Q71U36; Q9BQE3; P68366	0	1824.99	High	5.08	V
FALSE	High	NREPVQLETLSIR		1	1	4	P62314	1	1554.86	High	5.08	N
FALSE	High	TTFDEAMADLHTLSEDSYK		1	1	4	P31947	0	2173.96	High	5.08	T
FALSE	High	GQGVYLGMPGCLPVYDALAGEFIR	1xCarbamidomethyl [C11]	1	1	8	P30040	0	2583.27	High	5.08	G
FALSE	High	NWADAQTQIQNIAASFDQEAAAILMAR		1	1	3	Q15436	0	2947.44	High	5.08	N
FALSE	High	HSQDLAFLSMLNDIAAVPATAMPFR		1	1	3	P49327	0	2716.36	High	5.08	H
FALSE	High	YTPVQQGPVGVNVTYGGDPIPK		1	1	3	P21333	0	2286.18	High	5.08	Y
FALSE	High	MNPSAPSYPMASLYVGDLHPDVTEAMLYEK	1xAcetyl [N-Term]	1	1	3	P11940	0	3368.55	High	5.07	M
FALSE	High	EEIVQFFSGLEIVPNGITLPVDPEGK		1	1	4	P52597	0	2827.48	High	5.07	E
FALSE	High	SPLMSEFQSQISSNPELAAIFESIQK		1	1	4	Q86VP6	0	2881.43	High	5.07	S
FALSE	High	NIDDGTSDRPYSHALVAGIDR		1	1	4	P61353	0	2272.1	High	5.07	N
FALSE	High	ICDQWDALGSLTHSR	1xCarbamidomethyl [C2]	1	1	2	O43707	0	1758.82	High	5.07	I
FALSE	High	TVDLQDAEEAVELVQYAYFK		1	1	4	P25205	0	2331.14	High	5.07	T
FALSE	High	VIISAPSADAPMFVMGVNHEK		1	1	27	P04406	0	2213.11	High	5.07	V
FALSE	High	SRDNGPDGMEPEGVIESNWNEIVDSFDDMNLSESLLR		1	1	5	P60842	1	4166.86	High	5.07	S
FALSE	High	NMITGTAPLDGCILVVAANDGPMPQTR	1xCarbamidomethyl [C12]	1	1	1	P49411	0	2812.38	High	5.06	N
FALSE	High	MELSDANLQTLTEYLK	1xAcetyl [N-Term]	1	1	5	P55060	0	1910.94	High	5.06	M
FALSE	High	DLISDSNPMVVANAVAALSEIAESHPSSNLLDLNPQSINK		1	1	2	Q10567	0	4174.1	High	5.06	D
FALSE	High	SINPDEAVAYGAAVQAAILMGDK		1	2	21	P0DMV9	0	2304.15	High	5.06	S
FALSE	High	APVAGTCYQAEWDDYVPK	1xCarbamidomethyl [C7]	1	1	5	P30086	0	2069.93	High	5.06	A
FALSE	High	GNDISSGTVLSDYVGSGPPK		1	1	4	P30086	0	1949.95	High	5.06	G
FALSE	High	NVDLLSDMVQEHDEPILK		1	1	3	P55209	0	2095.04	High	5.06	N
FALSE	High	EILVGDVGQTVDDPYATFVK		1	1	27	P23528	0	2166.1	High	5.05	E
FALSE	High	NSNLVGAAHEELQQSR		1	1	5	P02545	0	1752.86	High	5.05	N
FALSE	High	IREDLPNLESSEETEQINK		1	1	1	Q96QK1	1	2244.1	High	5.05	I
FALSE	High	APVQPQQSPAAAPGGTDEKPSGK		1	1	1	Q13200	0	2218.11	High	5.05	A
FALSE	High	TQTVCNFTDGALVQHQEWDGK	1xCarbamidomethyl [C5]	1	2	1	A8MUU1	0	2434.11	High	5.05	T
FALSE	High	STNGDTFLGGEDFDQALLR		1	1	5	P38646	0	2055.96	High	5.05	S
FALSE	High	IVEFLQSFDEITAMTGDGVNDAPALK		1	1	1	P16615	0	2781.37	High	5.05	I
FALSE	High	IPDPEAVKPDDWDEDAPAK		1	1	4	P27824	0	2107.98	High	5.05	I
FALSE	High	ICALDDNVCMAFAGLTADAR	2xCarbamidomethyl [C2; C9]	1	1	2	O14818	0	2183.99	High	5.04	I
FALSE	High	VINEPTAAALAYGLDK		1	1	5	P38646	0	1645.88	High	5.04	V
FALSE	High	AEQPDGLILGMGGQTALNCGVELFK	1xCarbamidomethyl [C19]	1	1	8	P31327	0	2618.3	High	5.04	A
FALSE	High	DPEAPIFQVADYGIVADLFK		1	1	9	P13804	0	2208.12	High	5.04	D
FALSE	High	SLQDIIAILGMDELSEEDK		1	1	12	P06576	0	2119.05	High	5.04	S
FALSE	High	QMEQISQFLQAAER		1	1	3	P37802	0	1678.82	High	5.04	Q
FALSE	High	ITGEAFVQFASQELAEK		1	1	2	P52597	0	1867.94	High	5.03	I
FALSE	High	TVLLSIQALLSAPNPDDPLANDVAEQWK		1	1	3	P61088	0	3018.58	High	5.02	T
FALSE	High	EIADLGEALATAVIPQWQK		1	1	7	P49588	0	2053.1	High	5.02	E
FALSE	High	QTQIFTTYSDNQPGVLIQVYEGER		1	2	2	P0DMV9	0	2786.36	High	5.02	Q
FALSE	High	SLGYAYVNFQQPADAER		2	2	2	Q13310; P11940	0	1928.91	High	5.02	S
FALSE	High	GEVPCTVTSASPLEEATLSELK	1xCarbamidomethyl [C5]	1	1	5	P48047	0	2318.14	High	5.02	G
FALSE	High	LPVVIGGLLDVDCSEDVIK	1xCarbamidomethyl [C13]	1	1	2	Q00610	0	2041.09	High	5.02	L
FALSE	High	SNLFEDATSALVTGQSYENMVTEIMSMGYER		1	1	4	P54727	0	3473.55	High	5.02	S
FALSE	High	SQDAEVGDGTTSVTLLAAEFLK		1	1	3	Q99832	0	2252.13	High	5.02	S
FALSE	High	TATALLESPLSATVEDALQSFLK		1	1	5	Q96TC7	0	2405.28	High	5.01	T
FALSE	High	LNEDMACSVAGITSDANVLTNELR	1xCarbamidomethyl [C7]	1	1	2	P25789	0	2593.22	High	5.01	L
FALSE	High	LGEIVTTIPTIGFNVETVEYK		2	4	18	P61204; P18085	0	2323.24	High	5.01	L
FALSE	High	LEEDINSSMTNSTAASRPPVTLR		1	1	3	Q15365	0	2489.23	High	5.01	L
FALSE	High	LASTLVHLGEYQAAVDGAR		1	1	2	Q00610	0	1971.03	High	5.01	L
FALSE	High	QGAIVAVTGDGVNDSPALK		1	3	1	P05023	0	1811.95	High	5.01	Q
FALSE	High	QNVAYEYLCHLEEAK	1xCarbamidomethyl [C9]	1	1	1	P46940	0	1866.87	High	5.01	Q
FALSE	High	SPFVVQVGEACNPNACR	2xCarbamidomethyl [C11; C16]	1	1	3	O75369	0	1904.87	High	5.01	S
FALSE	High	LAGTQPLEVLEAVQR		1	1	5	P22314	0	1623.91	High	5	L
FALSE	High	IDQIEDLQDQLEDMMEDANEIQEALSR		1	1	1	Q9NZZ3	0	3191.44	High	5	I
FALSE	High	RGPSEETGGAVFDHPAK		1	1	1	O60563	1	1754.85	High	5	R
FALSE	High	VEAPSLDVHMDSPDINIEGPDVK		1	1	1	Q09666	0	2477.19	High	5	V
FALSE	High	VFIMDNCEELIPEYLNFIR	1xCarbamidomethyl [C7]	1	1	11	P07900	0	2415.17	High	5	V
FALSE	High	KEDGTFYEFGEDIPEAPER		1	1	1	O43776	1	2229	High	5	K
FALSE	High	TLSTIATSTDAASVVHSTDLVVEAIVENLK		1	1	10	Q16836	0	3084.63	High	5	T
FALSE	High	EEIVQFFSGLEIVPNGMTLPVDFQGR		1	1	2	P55795	0	2922.47	High	5	E
FALSE	High	AITVFSPDGHLFQVEYAQEAVK		1	2	2	O14818	0	2449.24	High	4.99	A
FALSE	High	VDIDAPDVDVHGPDWHLK		1	1	3	Q09666	0	2027.98	High	4.99	V
FALSE	High	IEAELQDICNDVLELLDK	1xCarbamidomethyl [C9]	1	1	14	P31946	0	2130.06	High	4.99	I
FALSE	High	EGLYFNPYFPGQAIAMAPPIYTDVLEFDDGTPATMSQIAK		1	1	5	P08574	0	4379.09	High	4.99	E
FALSE	High	ACGDSTLTQITAGLDPVGR	1xCarbamidomethyl [C2]	1	1	1	P62879	0	1931.95	High	4.98	A
FALSE	High	GFTDADNTWEPEENLDCPELIEAFLNSQK	1xCarbamidomethyl [C17]	1	1	6	Q13185	0	3382.51	High	4.98	G
FALSE	High	NNEDISIIPPLFTVSVDHR		1	1	4	P51571	0	2166.12	High	4.98	N
FALSE	High	YMIGVTYGGDDIPLSPYR		1	1	2	O75369	0	2016.97	High	4.98	Y
FALSE	High	IFYPEIEEVQALDDTER		1	1	4	P33316	0	2066.99	High	4.98	I
FALSE	High	LDETGNLMISEGHFASETIR		1	1	1	Q13813	0	2220.06	High	4.98	L
FALSE	High	IQVTPPGFQLVFLPFADDK		1	1	9	P12956	0	2132.14	High	4.97	I
FALSE	High	MQQNIQELEEQLEEEESAR		1	1	3	P35579	0	2333.06	High	4.97	M
FALSE	High	VVYGGGAAEISCALAVSQEADK	1xCarbamidomethyl [C12]	1	1	1	P48643	0	2195.06	High	4.97	V
FALSE	High	GNVQVVIPFLTESYSSSQDPPEK		1	1	2	P22314	0	2521.25	High	4.97	G
FALSE	High	EKPYFPIPEEYTFIQNVPLEDR		1	1	7	Q00839	0	2724.36	High	4.97	E
FALSE	High	MNPSTPSYPTASLYVGDLHPDVTEAMLYEK	1xAcetyl [N-Term]	0	1	3		0	3368.57	High	4.97	M
FALSE	High	HNQLPLVIEFTEQTAPK		1	1	2	P07237	0	1965.04	High	4.96	H
FALSE	High	TAFDDAIAELDTLNEDSYK		1	1	15	P61981	0	2130.97	High	4.96	T
FALSE	High	VLNNMEIGTSLFDEEGAK		1	1	6	P00558	0	1966.94	High	4.96	V
FALSE	High	TVASPGVTVEEAVEQIDIGGVTLLR		1	1	4	P31939	0	2553.38	High	4.95	T
FALSE	High	DNLTLWTSDMQGDGEEQNK		1	1	5	P62258	0	2180.94	High	4.95	D
FALSE	High	LVSSPCCIVTSTYGWTANMER	2xCarbamidomethyl [C6; C7]	1	1	4	P08238	0	2432.1	High	4.95	L
FALSE	High	GDTANEIGQVLHFENVK		1	1	4	P36952	0	1870.93	High	4.95	G
FALSE	High	VETDHIVAAVGLEPNVELAK		1	1	1	O95831	0	2104.13	High	4.95	V
FALSE	High	SELHIENLNMEADPGQYR		1	1	3	P35613	0	2115.98	High	4.95	S
FALSE	High	STGEAFVQFASQEIAEK		2	2	4	P31943; P55795	0	1841.89	High	4.95	S
FALSE	High	HLAGLGLTEAIDK		1	1	1	P50454	0	1337.74	High	4.95	H
FALSE	High	TYADYESVNECMEGVCK	2xCarbamidomethyl [C11; C16]	1	1	2	P84090	0	2054.81	High	4.95	T
FALSE	High	RKPEDVLDDDDAGSAPLK		1	1	1	P35613	1	1940.96	High	4.95	R
FALSE	High	YSNEDTLSVALPYFWEHFDK		1	1	13	P26641	0	2461.13	High	4.95	Y
FALSE	High	GIEEEEILPGFILCDPNNLCHSGR	2xCarbamidomethyl [C14; C20]	1	1	2	P15170	0	2769.3	High	4.95	G
FALSE	High	LGPGGLDPVEVYESLPEELQK		1	1	2	Q16543	0	2269.16	High	4.94	L
FALSE	High	LVARPEPATGYTLEFR		1	1	1	Q16658	0	1819.97	High	4.94	L
FALSE	High	STAISLFYELSENDLNFIK		1	1	14	P13639	0	2204.11	High	4.94	S
FALSE	High	SLVASLAEPDFVVTDFAK		1	1	13	P22314	0	1909	High	4.93	S
FALSE	High	DLPSQLAEIGAAAQQSLGEAIDVYQASVGFVCESPTEQVLPMLR	1xCarbamidomethyl [C32]	1	1	1	Q96JB5	0	4688.32	High	4.93	D
FALSE	High	QYDADLEQILIQWITTQCR	1xCarbamidomethyl [C18]	1	1	2	P37802	0	2394.18	High	4.93	Q
FALSE	High	FGGNPGGFGNQGGFGNSR		1	1	1	Q13148	0	1726.77	High	4.93	F
FALSE	High	ILQMEEEYIQQLCEDIIQLKPDVVITEK	1xCarbamidomethyl [C13]	1	1	5	P49368	0	3417.75	High	4.93	I
FALSE	High	SCSGVEFSTSGSSNTDTGK	1xCarbamidomethyl [C2]	1	1	1	P45880	0	1907.79	High	4.93	S
FALSE	High	LIVDEAINEDNSVVSLSQPK		1	1	4	P55072	0	2170.12	High	4.93	L
FALSE	High	IYDDDFFQNLDGVANALDNVDAR		1	1	13	P22314	0	2600.19	High	4.93	I
FALSE	High	NIELICQENEGENDPVLQR	1xCarbamidomethyl [C6]	1	1	1	Q15691	0	2270.07	High	4.92	N
FALSE	High	VEGTEPTTAFNLFVGNLNFNK		1	1	11	P19338	0	2312.16	High	4.92	V
FALSE	High	ALSVGNIDDALQCYSEAIK	1xCarbamidomethyl [C13]	1	1	7	P31948	0	2067.01	High	4.92	A
FALSE	High	VQDDEVGDGTTSVTVLAAELLR		1	1	2	P78371	0	2288.16	High	4.92	V
FALSE	High	KLEEEQIILEDQNCK	1xCarbamidomethyl [C14]	1	1	1	P35579	1	1888.93	High	4.92	K
FALSE	High	HELQANCYEEVK	1xCarbamidomethyl [C7]	1	1	6	P23528	0	1519.68	High	4.92	H
FALSE	High	FVVDLSDQVAPTDIEEGMR		1	1	2	P35998	0	2121.02	High	4.92	F
FALSE	High	NLSPYVSNELLEEAFSQFGPIER		1	1	5	P23246	0	2639.3	High	4.91	N
FALSE	High	GAGTGGLGLAVEGPSEAK		1	1	3	P21333	0	1570.81	High	4.91	G
FALSE	High	YIDSADLEPITSQEEPVR		1	1	1	P17812	0	2062	High	4.91	Y
FALSE	High	QQQEELEAEHGTGDKPAAPR		1	1	1	Q13895	0	2191.04	High	4.91	Q
FALSE	High	IQIASESSGIPERPCVLTGTPESIEQAK	1xCarbamidomethyl [C15]	1	1	1	Q96I24	0	2997.52	High	4.91	I
FALSE	High	TSIDAYDNFDNISLAQR		1	1	3	Q00610	0	1942.91	High	4.91	T
FALSE	High	AQELGHSQSALASAQR		1	1	1	Q14980	0	1653.83	High	4.91	A
FALSE	High	FVDGLMIHSGDPVNYYVDTAVR		1	1	2	P23396	0	2468.19	High	4.91	F
FALSE	High	FSGWYDADLSPAGHEEAK		1	1	5	P18669	0	1979.88	High	4.9	F
FALSE	High	IMDPNIVGSEHYDVAR		1	1	4	P06576	0	1815.87	High	4.9	I
FALSE	High	WSTDDVQINDISLQDYIAVK		1	1	2	P46782	0	2323.15	High	4.9	W
FALSE	High	DGDVTVTNDGATILSMMDVDHQIAK		1	1	2	P48643	0	2646.24	High	4.9	D
FALSE	High	FDTGNLCMVTGGANLGR	1xCarbamidomethyl [C7]	1	1	4	P62701	0	1782.83	High	4.9	F
FALSE	High	DDVFLSVPCILGQNGISDLVK	1xCarbamidomethyl [C9]	1	1	17	P00338	0	2289.18	High	4.9	D
FALSE	High	TVLGTPEVLLGALPGAGGTQR		1	1	2	P40939	0	2007.12	High	4.9	T
FALSE	High	AEISELPSIVQDLANGNITWADVEAR		1	1	6	P41250	0	2811.42	High	4.9	A
FALSE	High	QAGEVTFADAHRPK		1	1	1	Q13243	0	1526.77	High	4.9	Q
FALSE	High	DLGLSESGEDVNAAILDESGK		1	1	1	P13667	0	2119	High	4.89	D
FALSE	High	IVKPNGEKPDEFESGISQALLELEMNSDLK		1	1	1	P62081	0	3330.68	High	4.89	I
FALSE	High	EEGSEQAPLMSEDELINIIDGVLR		1	1	5	Q8NI22	0	2657.3	High	4.89	E
FALSE	High	HEPLVLFCESCDTLTCR	3xCarbamidomethyl [C8; C11; C16]	1	1	1	Q13263	0	2136.95	High	4.89	H
FALSE	High	ALINADELASDVAGAEALLDR		1	1	5	Q13813	0	2127.09	High	4.88	A
FALSE	High	KMDLIDLEDETIDAEVMNSLAVTMDDFR		1	1	2	P55072	1	3229.49	High	4.88	K
FALSE	High	TSIEDQDELSSLLQVPLVAGTVNR		1	1	6	P56537	0	2584.35	High	4.88	T
FALSE	High	ICPVETLVEEAIQCAEK	2xCarbamidomethyl [C2; C14]	1	1	10	P30084	0	1988.97	High	4.88	I
FALSE	High	FGAVWTGDNTAEWDHLK		1	1	2	Q14697	0	1946.9	High	4.88	F
FALSE	High	DYPVVSIEDPFDQDDWGAWQK		1	1	26	P06733	0	2510.11	High	4.88	D
FALSE	High	IRDEMVATEQER		1	1	2	P16615	1	1476.71	High	4.88	I
FALSE	High	TREEECHFYAGGQVYPGEASR	1xCarbamidomethyl [C6]	1	1	1	Q13162	1	2443.07	High	4.88	T
FALSE	High	GPDGLTAFEATDNQAIK		1	1	2	P58546	0	1747.85	High	4.87	G
FALSE	High	MDPNCSCAAGDSCTCAGSCK	1xAcetyl [N-Term]; 5xCarbamidomethyl [C5; C7; C13; C15; C19]	1	1	1	P02795	0	2250.76	High	4.87	M
FALSE	High	KPEDWDEEMDGEWEPPVIQNPEYK		1	1	4	P27797	0	2960.29	High	4.87	K
FALSE	High	DNHLLGTFDLTGIPPAPR		1	1	16	P11021	0	1934.01	High	4.87	D
FALSE	High	ASDSPIDLFYGDFFGDISEAVIQK		1	1	6	Q9Y2T3	0	2634.26	High	4.87	A
FALSE	High	CELLYEGPPDDEAAMGIK	1xCarbamidomethyl [C1]	1	1	8	P13639	0	2007.9	High	4.87	C
FALSE	High	FPSLLTHNENMVAK		1	1	4	P62906	0	1600.82	High	4.87	F
FALSE	High	FGIVTSSAGTGTTEDTEAK		1	1	1	P82979	0	1871.89	High	4.86	F
FALSE	High	MEYDGILIAGGPGNPALAEPLIQNVR		1	1	9	P31327	0	2708.41	High	4.86	M
FALSE	High	TSVLAAANPIESQWNPK		1	1	1	P33991	0	1825.94	High	4.86	T
FALSE	High	VNIAFNYDMPEDSDTYLHR		1	1	2	Q13838	0	2300.03	High	4.86	V
FALSE	High	EIVVTDYSDQNLQELEK		1	1	2	P40261	0	2022.99	High	4.86	E
FALSE	High	QSTQVMAASMSAFDPLK		1	1	1	Q92734	0	1811.87	High	4.86	Q
FALSE	High	ATPPQIVNGDQYCGDYELFVEAVEQNTLQEFLK	1xCarbamidomethyl [C13]	1	1	6	Q9H299	0	3815.81	High	4.86	A
FALSE	High	ATENDIANFFSPLNPIR		1	1	3	P31942	0	1918.97	High	4.85	A
FALSE	High	IANEVIGEMNLKPEEVFLAQGTLRPDLIESASLVASGK		1	1	6	P49915	0	4039.14	High	4.85	I
FALSE	High	YDERPGPSPLPHR		1	1	1	P08621	0	1520.76	High	4.85	Y
FALSE	High	TGTITTFEHAHNMR		1	1	2	P13639	0	1615.76	High	4.85	T
FALSE	High	LQVELDNVTGLLSQSDSK		1	1	2	P35579	0	1946.01	High	4.85	L
FALSE	High	SNDPQMVAENFVPPLLDAVLIDYQR		1	1	9	O14980	0	2844.42	High	4.85	S
FALSE	High	SSILLDVKPWDDETDMAQLEACVR	1xCarbamidomethyl [C22]	1	1	6	P29692	0	2791.33	High	4.85	S
FALSE	High	KVEAQLQELQVK		1	1	2	P35579	1	1412.81	High	4.85	K
FALSE	High	GAGTGGLGLTVEGPCEAK	1xCarbamidomethyl [C15]	1	2	3	O75369	0	1673.82	High	4.85	G
FALSE	High	HIFSEDTSDFSGMSETK		1	1	4	P36952	0	1917.82	High	4.84	H
FALSE	High	LPAAGVGDMVMATVK		1	1	6	P62829	0	1459.76	High	4.84	L
FALSE	High	TLAQAMLNNAQPDQYEAPDK		1	1	1	Q92973	0	2218.04	High	4.84	T
FALSE	High	EVSDGIIAPGYEEEALTILSK		1	1	3	P31939	0	2234.14	High	4.84	E
FALSE	High	VSLDVNHFAPDELTVK		1	1	1	P04792	0	1783.92	High	4.84	V
FALSE	High	MTLDTLSIYETPSMGLLDK		1	1	1	P55884	0	2128.06	High	4.84	M
FALSE	High	AIEPPPLDAVIEAEHTLR		1	1	1	Q08211	0	1971.05	High	4.84	A
FALSE	High	LGDVGMAELCPGLLHPSSR	1xCarbamidomethyl [C10]	1	1	1	P13489	0	2008.99	High	4.84	L
FALSE	High	WVDPNSPVLLEDPVLCALAK	1xCarbamidomethyl [C16]	1	1	6	P42330	0	2236.17	High	4.84	W
FALSE	High	EESQQMVLDIEDLDNIQTPESVLLSAVSGEDTQDR		1	1	4	Q14152	0	3903.83	High	4.83	E
FALSE	High	VSDTVVEPYNATLSVHQLVENTDETYCIDNEALYDICFR	2xCarbamidomethyl [C27; C37]	2	5	14	P07437; P68371	0	4593.11	High	4.83	V
FALSE	High	DAFEHIVTQFSSVPVSVVSDSYDIYNACEK	1xCarbamidomethyl [C28]	1	1	2	P43490	0	3406.58	High	4.83	D
FALSE	High	EAIVTSEELGQDLEHVEVLQK		1	1	1	Q13813	0	2366.21	High	4.83	E
FALSE	High	AVSGASAGDYSDAIETLLTAIAVIK		1	1	6	Q8N684	0	2436.29	High	4.83	A
FALSE	High	TVTNAVVTVPAYFNDSQR		1	1	10	P11142	0	1982	High	4.83	T
FALSE	High	VNDGVCDCCDGTDEYNSGVICENTCK	5xCarbamidomethyl [C6; C8; C9; C21; C25]	1	1	1	P14314	0	3041.13	High	4.83	V
FALSE	High	SDPLCVLLQDVGGGSWAELGR	1xCarbamidomethyl [C5]	1	1	4	Q99829	0	2229.1	High	4.83	S
FALSE	High	TLVLSNLSYSATEETLQEVFEK		1	1	16	P19338	0	2501.27	High	4.82	T
FALSE	High	EEDAASTLVTGSEYETMLTEIMSMGYER		1	1	2	P54725	0	3143.37	High	4.82	E
FALSE	High	VIAINVDDPDAANYNDINDVK		1	1	4	Q15181	0	2288.1	High	4.82	V
FALSE	High	IINEPTAAAIAYGLDK		2	4	13	P11142; P11021	0	1659.9	High	4.82	I
FALSE	High	LGIDDLVHFDFMDPPAPETLMR		1	1	3	O43143	0	2529.22	High	4.82	L
FALSE	High	MDPLSELQDDLTLDDTSEALNQLK	1xAcetyl [N-Term]	1	1	5	Q07960	0	2746.3	High	4.82	M
FALSE	High	NADGFIDLEEYIGDMYSHDGNTDEPEWVK		1	1	4	O43852	0	3359.43	High	4.82	N
FALSE	High	NLDIERPTYTNLNR		3	7	7	Q71U36; Q9BQE3; P68366	0	1718.88	High	4.82	N
FALSE	High	QLQQAQAAGAEQEVEK		1	1	2	P39748	0	1727.86	High	4.82	Q
FALSE	High	LTESPCALVASQYGWSGNMER	1xCarbamidomethyl [C6]	1	1	3	P14625	0	2356.07	High	4.82	L
FALSE	High	YNEDLELEDAIHTAILTLK		1	1	9	P25787	0	2201.13	High	4.82	Y
FALSE	High	IIANALSSEPACLAEIEEDK	1xCarbamidomethyl [C12]	1	1	3	P78527	0	2173.07	High	4.82	I
FALSE	High	IYELAAGGTAVGTGLNTR		1	1	2	P07954	0	1763.93	High	4.81	I
FALSE	High	SYIEGYVPSQADVAVFEAVSSPPPADLCHALR	1xCarbamidomethyl [C28]	1	1	1	P24534	0	3445.67	High	4.81	S
FALSE	High	GEDEAELALSLLAQLGITPLPLSR		1	1	1	Q66K74	0	2506.38	High	4.81	G
FALSE	High	CGNQAAIMELDDTLK	1xCarbamidomethyl [C1]	1	2	1	P67775	0	1678.78	High	4.81	C
FALSE	High	AEDNADTLALVFEAPNQEK		1	1	6	P12004	0	2074.99	High	4.81	A
FALSE	High	LVNACLAEELPHIHAFEQK	1xCarbamidomethyl [C5]	1	1	1	Q9H3K6	0	2219.13	High	4.81	L
FALSE	High	GAEAANVTGPDGVPVEGSR		1	1	1	P16989	0	1782.86	High	4.81	G
FALSE	High	TGGAYGEDLGADYNLSQVCDGK	1xCarbamidomethyl [C19]	1	1	1	P49327	0	2289.99	High	4.81	T
FALSE	High	DVPNETLQVEEDDRPELPWWK		1	1	2	O95373	0	2595.24	High	4.81	D
FALSE	High	DGELPVEDDIDLSDVELDDLGKDEL		1	1	3	Q15084	1	2758.27	High	4.81	D
FALSE	High	IQEIIEQLDVTTSEYEK		1	1	5	P10809	0	2038.02	High	4.8	I
FALSE	High	VNNVVWDLDRPLEEDCTLELLK	1xCarbamidomethyl [C16]	1	1	10	P26639	0	2670.34	High	4.8	V
FALSE	High	QVMVVPVGPTCDEYAQK	1xCarbamidomethyl [C11]	1	1	3	P26639	0	1920.92	High	4.8	Q
FALSE	High	LDEEAENLVATVVPTHLAAAVPEVAVYLK		1	1	3	Q15257	0	3061.65	High	4.8	L
FALSE	High	LIALSIDSVEDHLAWSK		1	1	2	P30041	0	1897.01	High	4.8	L
FALSE	High	GILEESPSEAEDFISGITQTMVEAVAEVEK		1	1	1	Q14966	0	3208.55	High	4.79	G
FALSE	High	MIAGQVLDINLAAEPK		1	1	6	P07910	0	1682.91	High	4.79	M
FALSE	High	LEEDISSSMTNSTAASRPPVTLR		1	1	2	Q15366	0	2462.22	High	4.79	L
FALSE	High	IGPILDNSTLQSEVKPILEK		1	1	2	P30153	0	2194.23	High	4.79	I
FALSE	High	IHGTEEGQQILK		1	1	1	Q14980	0	1352.72	High	4.79	I
FALSE	High	KQELEEICHDLEAR	1xCarbamidomethyl [C8]	1	1	1	P35579	1	1769.85	High	4.79	K
FALSE	High	NLHYFNSDSFASHPNYPYSDEY		1	1	1	P42330	0	2667.11	High	4.79	N
FALSE	High	EENGVLVLNDANFDNFVADK		1	1	1	P13667	0	2223.06	High	4.78	E
FALSE	High	AAVEEGIVLGGGCALLR	1xCarbamidomethyl [C13]	1	1	5	P10809	0	1684.91	High	4.78	A
FALSE	High	EVDPLVYNMSHEDPGNVSYSEIGGLSEQIR		1	1	1	P62333	0	3334.55	High	4.78	E
FALSE	High	ETKPEPMEEDLPENKK		1	1	3	P31948	1	1913.92	High	4.78	E
FALSE	High	LAQQYYLVYQEPIPTAQLVQR		1	1	1	P25787	0	2521.34	High	4.78	L
FALSE	High	LVQAFQYTDEHGEVCPAGWKPGSDTIKPNVDDSK	1xCarbamidomethyl [C15]	1	1	1	P32119	0	3788.79	High	4.77	L
FALSE	High	FGVEQDVDMVFASFIR		1	1	15	P14618	0	1859.9	High	4.77	F
FALSE	High	NLPQYVSNELLEEAFSVFGQVER		1	1	10	Q15233	0	2668.33	High	4.77	N
FALSE	High	KSDIDEIVLVGGSTR		1	1	3	P11021	1	1588.85	High	4.77	K
FALSE	High	GYEDYLQSPLQPLMDNLESQTYEVFEK		1	1	3	O14744	0	3236.5	High	4.77	G
FALSE	High	AAVATFLQSVQVPEFTPK		1	1	6	P22314	0	1933.04	High	4.77	A
FALSE	High	DEYDDLSDLTAAQQETLSDWESQFTFK		1	1	3	O00264	0	3182.4	High	4.77	D
FALSE	High	QAWFIENEEQEYVQTVK		1	1	3	P04083	0	2141.02	High	4.77	Q
FALSE	High	QFASQANVVGPWIQTK		1	1	2	O43707	0	1773.93	High	4.77	Q
FALSE	High	INPYMSSPCHIEMILTEK	1xCarbamidomethyl [C9]	1	1	2	P18621	0	2163.03	High	4.77	I
FALSE	High	STVLTPMFVETQASQGTLQTR		1	1	1	P78527	0	2295.16	High	4.77	S
FALSE	High	STAGDTHLGGEDFDNR		1	2	5	P11142	0	1691.73	High	4.76	S
FALSE	High	DLPTIPGVTSPSSDEPPMEASQSHLR		1	1	1	Q13541	0	2748.31	High	4.76	D
FALSE	High	VGETAPPNAYTVTDLVEYSIVIQQLSNGK		1	1	1	P39656	0	3106.59	High	4.76	V
FALSE	High	VMEMYQPSAVVLQCGADSLSGDR	1xCarbamidomethyl [C14]	1	1	1	Q92769	0	2513.15	High	4.76	V
FALSE	High	GNLYSFGCPEYGQLGHNSDGK	1xCarbamidomethyl [C8]	1	1	1	Q9P258	0	2300	High	4.76	G
FALSE	High	NPVWYQALTHGLNEEQR		1	1	1	O95373	0	2055	High	4.76	N
FALSE	High	LVSDGQALPEMEIHLQTNAEK		1	1	2	Q12931	0	2323.16	High	4.76	L
FALSE	High	YMNSGPVVAMVWEGLNVVK		1	2	17	P22392	0	2093.06	High	4.76	Y
FALSE	High	IDNDGDGFVTTEELK		1	1	2	Q15293	0	1652.76	High	4.76	I
FALSE	High	VLTEDEMGHPEIGDAIAR		1	1	2	P14324	0	1952.94	High	4.76	V
FALSE	High	FIQENIFGICPHMTEDNK	1xCarbamidomethyl [C10]	1	1	1	P30101	0	2193.01	High	4.76	F
FALSE	High	TFVNITPAEVGVLVGK		1	1	23	P07737	0	1643.94	High	4.75	T
FALSE	High	ENIMDDDEGEVVEYVDDLLELEETS		1	1	1	O75718	0	2900.24	High	4.75	E
FALSE	High	GETVNDCHAEIISR	1xCarbamidomethyl [C7]	1	1	1	P55265	0	1600.74	High	4.75	G
FALSE	High	DLAILQCHGELDPMVPVR	1xCarbamidomethyl [C7]	1	1	1	O95372	0	2063.04	High	4.75	D
FALSE	High	EEDGSLSLDGADSTGVVAK		1	1	1	Q13263	0	1849.87	High	4.74	E
FALSE	High	HLYTLDGGDIINALCFSPNR	1xCarbamidomethyl [C15]	1	1	2	P63244	0	2276.11	High	4.74	H
FALSE	High	QTVVSDTELSIVESSVISLLQEAESK		1	1	3	Q9BZH6	0	2791.45	High	4.74	Q
FALSE	High	DGTVLCELINALYPEGQAPVK	1xCarbamidomethyl [C6]	1	1	14	P37802	0	2287.16	High	4.74	D
FALSE	High	SVIEQGGIQTVDQLIK		1	1	1	Q8WUM4	0	1727.95	High	4.74	S
FALSE	High	IRVDVADQAQDK		1	1	2	P23588	1	1357.71	High	4.74	I
FALSE	High	DWILPSDYDHAEAEAR		1	1	2	O43852	0	1887.85	High	4.74	D
FALSE	High	GGAAVDPDSGLEHSAHVLEK		1	1	2	P09874	0	1988.97	High	4.73	G
FALSE	High	AKPYEGSILEADCDILIPAASEK	1xCarbamidomethyl [C13]	1	1	1	P00367	0	2490.24	High	4.73	A
FALSE	High	EHALLAYTLGVK		1	3	5	P68104	0	1314.74	High	4.73	E
FALSE	High	DPANFQYPAESVLAYK		1	1	2	P15559	0	1812.88	High	4.73	D
FALSE	High	SGSAADTQAVADAVTYQLGFHSIELNEPPLVHTAASLFK		1	1	3	P28072	0	4056.03	High	4.73	S
FALSE	High	VNNSTMLGASGDYADFQYLK		1	1	1	P28070	0	2194.01	High	4.73	V
FALSE	High	HSSLAGCQIINYR	1xCarbamidomethyl [C7]	1	1	3	Q00610	0	1518.75	High	4.73	H
FALSE	High	LVDISYGGENGFNQAIELSTEVLSNVK		1	1	3	P62495	0	2896.46	High	4.73	L
FALSE	High	WNTDNTLGTEIAIEDQICQGLK	1xCarbamidomethyl [C18]	1	1	6	P45880	0	2519.21	High	4.73	W
FALSE	High	EGPIDLGACNQDDWISAVRPVIEK	1xCarbamidomethyl [C9]	1	1	1	Q9Y5K5	0	2682.32	High	4.73	E
FALSE	High	NIIHGSDSVESAEK		1	1	3	P15531	0	1485.72	High	4.73	N
FALSE	High	LQAQQDAVNIVCHSK	1xCarbamidomethyl [C12]	1	1	1	P55036	0	1710.86	High	4.73	L
FALSE	High	MDEEYDVIVLGTGLTECILSGIMSVNGK	1xAcetyl [N-Term]; 1xCarbamidomethyl [C17]	1	1	1	P31150	0	3085.48	High	4.72	M
FALSE	High	AIVDALPPPCESACTVPTDVDK	2xCarbamidomethyl [C10; C14]	1	1	5	Q15181	0	2355.12	High	4.72	A
FALSE	High	VDIDVPDVDVQGPDWHLK		1	1	1	Q09666	0	2047.01	High	4.72	V
FALSE	High	VTVVCEPEDYVVVSTEMQSSESK	1xCarbamidomethyl [C5]	1	1	1	P31939	0	2602.19	High	4.72	V
FALSE	High	TDHPEIGEGKPTPALSEEASSSSIR		1	1	1	Q16891	0	2595.25	High	4.72	T
FALSE	High	HSLNSSSASTTEPDFQK		1	1	1	P42704	0	1835.84	High	4.72	H
FALSE	High	VPTANVSVVDLTCR	1xCarbamidomethyl [C13]	1	1	10	P04406	0	1530.79	High	4.72	V
FALSE	High	LTESVDVLMPNVGEIVGGSMR		1	1	2	O43776	0	2203.11	High	4.71	L
FALSE	High	EYFGGFGEVESIELPMDNK		1	1	6	Q14103	0	2160.98	High	4.71	E
FALSE	High	DAGEGLLAVQITDPEGKPK		1	1	3	P21333	0	1938.02	High	4.71	D
FALSE	High	YLNAGAGGIAGAFIHEK		1	1	2	Q16719	0	1688.88	High	4.71	Y
FALSE	High	SNMGHPEPASGLAALAK		1	1	1	P49327	0	1650.83	High	4.71	S
FALSE	High	ATIELCSTHANDASALR	1xCarbamidomethyl [C6]	1	1	1	P55060	0	1829.88	High	4.71	A
FALSE	High	YGGPPPDSVYSGVQPGIGTEVFVGK		1	1	1	O43390	0	2507.25	High	4.71	Y
FALSE	High	SDLFQDDLYPDTAGPEAALEAEEWFEGK		1	1	3	Q9ULV4	0	3143.4	High	4.71	S
FALSE	High	MTLSNPSELDELMSEEAYEK		1	1	1	P23434	0	2316.03	High	4.71	M
FALSE	High	NPWSMDENLMHISYEAGILENPK		1	1	8	P00966	0	2688.24	High	4.71	N
FALSE	High	VTAQGPGLEPSGNIANK		1	1	3	P21333	0	1652.86	High	4.71	V
FALSE	High	ENTEGEYSGIEHVIVDGVVQSIK		1	1	2	P50213	0	2502.24	High	4.71	E
FALSE	High	QQSIAGSADSKPIDVSR		1	1	1	Q12904	0	1758.9	High	4.71	Q
FALSE	High	VCTLAIIDPGDSDIIR	1xCarbamidomethyl [C2]	1	1	6	P62888	0	1757.91	High	4.71	V
FALSE	High	LPIPESQVITINPELPVEEAAEDYAK		1	1	1	O95336	0	2865.48	High	4.7	L
FALSE	High	QLSQSLLPAIVELAEDAK		1	2	3	P30153	0	1925.06	High	4.7	Q
FALSE	High	SLGQNPTEAELQDMINEVDADGNGTIDFPEFLTMMAR		1	1	5	P0DP25	0	4069.85	High	4.7	S
FALSE	High	LAALNPESNTAGLDIFAK		1	1	4	O00299	0	1844.98	High	4.7	L
FALSE	High	ERHPGSFDVVHVK		1	2	1	P62701	1	1506.78	High	4.7	E
FALSE	High	EIGLLSEEVELYGETK		1	1	1	P11586	0	1808.92	High	4.7	E
FALSE	High	IEDLSQQAQLAAAEK		1	2	4	Q13765	0	1614.83	High	4.7	I
FALSE	High	NPDDITNEEYGEFYK		1	1	3	P07900	0	1833.78	High	4.7	N
FALSE	High	MALDALLQEIALSEPQLCEVLQVAGPDR	1xCarbamidomethyl [C18]	1	1	2	Q7Z2W4	0	3079.58	High	4.7	M
FALSE	High	QETEVELYNEFPEPIK		1	1	2	P51149	0	1964.95	High	4.7	Q
FALSE	High	LLEGDGGPNTGGMGAYCPAPQVSNDLLLK	1xCarbamidomethyl [C17]	1	1	1	P22102	0	2944.42	High	4.7	L
FALSE	High	VFEVSLADLQNDEVAFR		1	1	11	P61247	0	1951.98	High	4.7	V
FALSE	High	VLLVSPELQAAVEEILPSLK		1	1	4	O14975	0	2148.25	High	4.7	V
FALSE	High	AVLSAEQLRDEEVHAGLGELLR		1	1	1	P50454	1	2405.28	High	4.69	A
FALSE	High	LAPEEVPLSAEAQAQQLAQELAWCVEQLELGLK	1xCarbamidomethyl [C24]	1	1	2	Q9H7E9	0	3661.88	High	4.69	L
FALSE	High	SLDLFNCEVTNLNDYR	1xCarbamidomethyl [C7]	2	2	5	P39687; Q92688	0	1972.91	High	4.69	S
FALSE	High	GAVVGIDLGTTNSCVAVMEGK	1xCarbamidomethyl [C14]	1	1	1	P38646	0	2078.03	High	4.69	G
FALSE	High	GVNLPGAAVDLPAVSEK		1	1	9	P14618	0	1636.89	High	4.69	G
FALSE	High	SALQSINEWAAQTTDGK		1	1	2	P50454	0	1819.88	High	4.69	S
FALSE	High	MNPAAEAEFNILLATDSYK	1xAcetyl [N-Term]	1	1	4	P43490	0	2140.03	High	4.69	M
FALSE	High	HGLEVIYMIEPIDEYCVQQLK	1xCarbamidomethyl [C16]	1	1	5	P07900	0	2577.27	High	4.69	H
FALSE	High	AGVVGPELHEQLLSAEK		1	1	2	Q15149	0	1776.95	High	4.69	A
FALSE	High	CMIDQAHQEERPIR	1xCarbamidomethyl [C1]	1	1	1	Q9UBQ5	0	1782.84	High	4.69	C
FALSE	High	VIEINPYLLGTMAGGAADCSFWER	1xCarbamidomethyl [C19]	1	1	2	P28074	0	2670.27	High	4.69	V
FALSE	High	LTAQVASLTSELTTLNATIQQQDQELAGLK		1	1	1	Q14980	0	3185.69	High	4.68	L
FALSE	High	HPDASVNFSEFSK		1	1	2	P09429	0	1464.68	High	4.68	H
FALSE	High	DFSALESQLQDTQELLQEENR		1	1	6	P35579	0	2493.17	High	4.68	D
FALSE	High	IEIESFYEGEDFSETLTR		1	1	2	P11021	0	2164.99	High	4.68	I
FALSE	High	IGGDAGTSLNSNDYGYGGQK		1	1	1	Q96AE4	0	1973.88	High	4.68	I
FALSE	High	MAQLLDLSVDESEAFLSNLVVNK		1	1	2	O00232	0	2535.3	High	4.68	M
FALSE	High	LFNDSSPVVLEESWDALNAITK		1	1	1	Q92616	0	2448.23	High	4.68	L
FALSE	High	VADSSPFALELLISDDCFVLDNGLCGK	2xCarbamidomethyl [C17; C25]	1	1	3	P40121	0	2955.41	High	4.68	V
FALSE	High	EGMAALQSDPWQQELYR		1	1	1	P49748	0	2021.94	High	4.68	E
FALSE	High	TAFDEAIAELDTLSEESYK		1	1	24	P63104	0	2131.99	High	4.68	T
FALSE	High	AVELLGDIVQNCSLEDSQIEK	1xCarbamidomethyl [C12]	1	1	2	P31930	0	2360.16	High	4.68	A
FALSE	High	IPEISIQDMTAQVTSPSGK		1	1	5	P21333	0	2002.02	High	4.68	I
FALSE	High	VTEGLTDVILYHQPDDK		1	1	3	O60506	0	1942.98	High	4.68	V
FALSE	High	QAAPCVLFFDELDSIAK	1xCarbamidomethyl [C5]	1	1	8	P55072	0	1923.95	High	4.68	Q
FALSE	High	DGLEDPLEDTGLVQQQLDQLSTIGR		1	1	2	Q9UIA9	0	2740.36	High	4.68	D
FALSE	High	VFEMIESQDPTMIGVAVDTVGILGSNVEGK		1	1	2	Q16401	0	3135.56	High	4.68	V
FALSE	High	YVASYLLAALGGNSSPSAK		1	1	1	P05387	0	1868.98	High	4.68	Y
FALSE	High	GDVSNLDPNFSFEGTK		1	1	2	Q01650	0	1726.79	High	4.67	G
FALSE	High	SMAASGNLGHTPFVDEL		1	1	2	P22695	0	1745.82	High	4.67	S
FALSE	High	MEVGPTMVGDEQSDPELMQHLGASK		1	1	2	P30047	0	2686.22	High	4.67	M
FALSE	High	VMVDSLVEQEIQTSVATLDETEELPR		1	1	1	P57740	0	2931.45	High	4.67	V
FALSE	High	TAAAVAAQSGILDR		1	1	1	Q9Y6N5	0	1343.73	High	4.67	T
FALSE	High	KEPEAFDWSPVVTYVCDLEGNR	1xCarbamidomethyl [C16]	1	1	1	P40261	1	2611.21	High	4.67	K
FALSE	High	LPLQLDDAVRPEAEGEEEGR		1	1	1	P14868	0	2223.09	High	4.67	L
FALSE	High	VAAAESMPLLLECAR	1xCarbamidomethyl [C13]	1	1	1	O00410	0	1630.83	High	4.67	V
FALSE	High	VILGSEAAQQHPEEVR		1	1	1	Q9NY33	0	1762.91	High	4.67	V
FALSE	High	DFVSEQLTSLLVNGVQLPALGENK		1	1	3	P54136	0	2571.37	High	4.67	D
FALSE	High	ETDLLLDDSLVSIFGNR		1	1	12	P30044	0	1906.98	High	4.67	E
FALSE	High	VLYSNMLGEENTYLWR		1	1	2	Q00325	0	1987.96	High	4.67	V
FALSE	High	DLYANTVLSGGTTMYPGIADR	1xOxidation [M14]	1	2	5	P60709	0	2231.06	High	4.67	D
FALSE	High	SPQELLCGASLISDR	1xCarbamidomethyl [C7]	1	1	5	P00734	0	1645.82	High	4.66	S
FALSE	High	NAQAIEDMVGYAQETQHEK		1	1	1	Q99460	0	2161.98	High	4.66	N
FALSE	High	AGAIAPCEVTVPAQNTGLGPEK	1xCarbamidomethyl [C7]	1	2	4	P05388	0	2180.1	High	4.66	A
FALSE	High	ILTSVDQYLELIGNSLPGTTAK		1	1	3	Q96TA1	0	2333.26	High	4.66	I
FALSE	High	ATAGDTHLGGEDFDNR		1	4	4	P0DMV9	0	1675.73	High	4.66	A
FALSE	High	FVDHVFDEQVIDSLTVK		1	1	1	P04843	0	1991.01	High	4.66	F
FALSE	High	QDLMNIAGTTLSSK		1	1	2	P78371	0	1478.75	High	4.66	Q
FALSE	High	AAVDAGFVPNDMQVGQTGK		1	1	2	P13804	0	1904.92	High	4.66	A
FALSE	High	AGAISASGPELQGAGHSK		1	1	1	Q09666	0	1637.82	High	4.66	A
FALSE	High	HGYIGEFEIIDDHR		1	1	1	P62244	0	1700.8	High	4.65	H
FALSE	High	QITSYGETCPGLEQYAIK	1xCarbamidomethyl [C9]	1	1	2	P50990	0	2057.98	High	4.65	Q
FALSE	High	SADGSAPAGEGEGVTLQR		1	1	2	Q01650	0	1701.8	High	4.65	S
FALSE	High	EALLSSAVDHGSDEVK		1	1	1	P78371	0	1656.81	High	4.65	E
FALSE	High	LVLEQVVTSIASVADTAEEK		1	1	5	O00410	0	2102.12	High	4.65	L
FALSE	High	NDALEMVEETTWQGLK		1	1	1	P49748	0	1863.88	High	4.65	N
FALSE	High	HGVDVEVQGPHEAR		1	1	1	Q9HCE1	0	1529.75	High	4.64	H
FALSE	High	NMAEQIIQEIYSQIQSK		1	1	14	P29401	0	2023.02	High	4.64	N
FALSE	High	TPVEEVPAAIAPFQGR		1	1	1	Q15393	0	1681.89	High	4.64	T
FALSE	High	NIDNPALADIYTEHAHQVVVAK		1	1	1	O75083	0	2418.24	High	4.64	N
FALSE	High	GADFLVTEVENGGSLGSK		1	1	9	P14618	0	1779.88	High	4.64	G
FALSE	High	ASGNYATVISHNPETK		1	1	5	P62917	0	1688.82	High	4.64	A
FALSE	High	SPNEANLIDFTNEAVEQVEEEESGEAQLSFLTGGPAAAASSLER		1	1	1	O15027	0	4607.15	High	4.63	S
FALSE	High	NTSEQDQPMGGWEMIR		1	1	1	P20700	0	1878.81	High	4.63	N
FALSE	High	THYSNIEANESEEVR		1	1	1	P04632	0	1777.8	High	4.63	T
FALSE	High	SEEAHAEDSVMDHHFR		1	1	2	Q8NC51	0	1896.79	High	4.63	S
FALSE	High	IQPSGGTNINEALLR		1	1	5	P19823	0	1582.85	High	4.63	I
FALSE	High	EGILSDEIYCPPETAVLLGSYAVQAK	1xCarbamidomethyl [C10]	1	1	6	P15311	0	2823.41	High	4.62	E
FALSE	High	LGSAGGLGSTLGGSSYSSCYSFGSGGGYGSSFGGVDGLLAGGEK	1xCarbamidomethyl [C19]	1	1	2	Q04695	0	4024.81	High	4.62	L
FALSE	High	DENQSINHQMAQEDAQR		1	1	1	P20073	0	2013.87	High	4.62	D
FALSE	High	FTQAGSEVSALLGR		1	1	3	P06576	0	1435.75	High	4.62	F
FALSE	High	DTNYTLNTDSLDWALYDHLMDFLADR		1	1	2	Q07021	0	3118.41	High	4.62	D
FALSE	High	LDGNELDLSLSDLNEVPVK		1	1	2	Q96AG4	0	2070.06	High	4.62	L
FALSE	High	ILTATVDNANILLQIDNAR		1	1	5	Q04695	0	2068.14	High	4.62	I
FALSE	High	GNAGQSNYGFANSAMER		1	1	1	P49327	0	1773.76	High	4.62	G
FALSE	High	ATVAAFAASEGHSHPR		1	2	1	O14910	0	1608.79	High	4.62	A
FALSE	High	NLLHVTDTGVGMTR		1	1	4	P14625	0	1513.78	High	4.62	N
FALSE	High	LAPITSDPTEATAVGAVEASFK		1	1	53	P14618	0	2175.12	High	4.62	L
FALSE	High	CPEALFQPSFLGMESCGIHETTFNSIMK	2xCarbamidomethyl [C1; C16]; 1xOxidation [M]	1	2	17	P60709	0	3247.46	High	4.62	C
FALSE	High	SQYHDLQAPDNQQTK		1	1	1	Q9H788	0	1772.82	High	4.61	S
FALSE	High	MATEVAADALGEEWK		1	1	4	P62753	0	1620.76	High	4.61	M
FALSE	High	MGPGAASGGERPNLK		1	1	3	Q9H0U4	0	1441.72	High	4.61	M
FALSE	High	SGGASHSELIHNLR		1	1	1	P22061	0	1477.75	High	4.61	S
FALSE	High	GVVPLAGTDGETTTQGLDGLSER		1	1	5	P09972	0	2273.13	High	4.61	G
FALSE	High	KPPLLNNADSVQAK		1	1	3	P09874	0	1494.83	High	4.61	K
FALSE	High	IVAERPGTNSTGPAPMAPPR		1	1	1	Q13263	0	2019.04	High	4.61	I
FALSE	High	VYQSLCPTSWVTDWDEQR	1xCarbamidomethyl [C6]	1	1	2	P14854	0	2270.02	High	4.61	V
FALSE	High	QAASSLQQASLK		1	1	2	P38646	0	1231.66	High	4.61	Q
FALSE	High	TVVVNCNPETVSTDFDECDK	2xCarbamidomethyl [C6; C18]	1	1	4	P31327	0	2329	High	4.6	T
FALSE	High	LGAGYPMGPFELLDYVGLDTTK		1	1	8	Q16836	0	2357.17	High	4.6	L
FALSE	High	FACNGTVIEHPEYGEVIQLQGDQR	1xCarbamidomethyl [C3]	1	2	1	P41567	0	2760.3	High	4.6	F
FALSE	High	LESEMEDAYHEHQANLLR		1	1	1	P23246	0	2185	High	4.6	L
FALSE	High	ATENDIYNFFSPLNPVR		2	2	18	P31943; P52597	0	1996.98	High	4.6	A
FALSE	High	YESSALPSGQLTSLSEYASR		1	1	2	Q12931	0	2146.03	High	4.6	Y
FALSE	High	APLDIPIPDPPPKDDEMETDK		1	1	1	Q9UL46	1	2333.12	High	4.6	A
FALSE	High	AADEEAFEDNSEEYIR		1	1	1	P55060	0	1887.79	High	4.6	A
FALSE	High	SAAPSTLDSSSTAPAQLGK		1	1	1	Q9Y5M8	0	1788.9	High	4.6	S
FALSE	High	SLVEASSSGVSVLSLCEK	1xCarbamidomethyl [C16]	1	1	1	Q9UQ80	0	1851.94	High	4.6	S
FALSE	High	AGCECLNESDEHGFDNCLR	3xCarbamidomethyl [C3; C5; C17]	1	1	1	O43396	0	2282.89	High	4.6	A
FALSE	High	IWEQIQPDLHTNDECVATYK	1xCarbamidomethyl [C15]	1	1	1	Q12904	0	2460.15	High	4.6	I
FALSE	High	SLETENSALQLQVTER		1	1	1	P20700	0	1817.92	High	4.6	S
FALSE	High	QILVGDIGDTVEDPYTSFVK		1	1	1	Q9Y281	0	2196.11	High	4.6	Q
FALSE	High	SNQQLENDLNLMDIK		1	1	2	P46940	0	1774.86	High	4.6	S
FALSE	High	APSVATVGSICDLNLK	1xCarbamidomethyl [C11]	1	1	3	O75369	0	1644.86	High	4.59	A
FALSE	High	VANPSGNLTETYVQDR		1	1	2	P21333	0	1763.86	High	4.59	V
FALSE	High	MTEWETAAPAVAETPDIK	1xAcetyl [N-Term]	1	1	5	P46782	0	2001.95	High	4.59	M
FALSE	High	VPSENVLGEVGSGFK		1	1	2	P49748	0	1518.78	High	4.59	V
FALSE	High	VDIETPNLEGTLTGPR		1	1	1	Q09666	0	1711.89	High	4.59	V
FALSE	High	TDITYPAGFMDVISIDK		1	1	13	P62701	0	1885.93	High	4.59	T
FALSE	High	TGIEQGSDAGYLCESQK	1xCarbamidomethyl [C13]	1	1	1	P40939	0	1842.82	High	4.59	T
FALSE	High	DAIITCNPEEFIVEALQLPNFQQSVQEYR	1xCarbamidomethyl [C6]	1	1	2	Q9BQ52	0	3451.68	High	4.59	D
FALSE	High	LFIGGLSFETTEESLR		1	1	8	P22626	0	1798.92	High	4.59	L
FALSE	High	IEGYEDQVLITEHGDLGNSR		1	1	2	P52907	0	2245.07	High	4.59	I
FALSE	High	LDEIYVAGLVAHSDLDER		1	1	1	O60506	0	2015.01	High	4.59	L
FALSE	High	ETFGVNNAVYGIDAMNPSSR		1	1	1	O75822	0	2141.99	High	4.58	E
FALSE	High	EALELTDTGLLSGSEER		1	1	1	Q14204	0	1819.89	High	4.58	E
FALSE	High	SQEQLAAELAEYTAK		1	1	2	P15311	0	1651.82	High	4.58	S
FALSE	High	VLECLASGIVMPDGSGIYDPCEK	2xCarbamidomethyl [C4; C21]	1	1	2	Q12906	0	2510.16	High	4.58	V
FALSE	High	QVEPLDPPAGSAPGEHVFVK		1	1	1	P54577	0	2074.06	High	4.58	Q
FALSE	High	DASIVGFFDDSFSEAHSEFLK		1	1	9	P30101	0	2348.07	High	4.58	D
FALSE	High	DAGYGGLSLSIEGPSK		1	1	1	P21333	0	1550.77	High	4.58	D
FALSE	High	LVTSPCCIVTSTYGWTANMER	2xCarbamidomethyl [C6; C7]	1	1	2	P07900	0	2446.12	High	4.58	L
FALSE	High	NATNVEQAFMTMAAEIK		1	2	2	Q9H0U4	0	1868.89	High	4.58	N
FALSE	High	AGGIETIANEYSDR		1	1	2	P34932	0	1495.7	High	4.58	A
FALSE	High	GTEDITSPHGIPLDLLDR		1	1	3	Q9Y265	0	1949	High	4.58	G
FALSE	High	EQLIDMNAEGDETGVMDSLLEALQSGAAFR		1	1	2	O60610	0	3210.49	High	4.58	E
FALSE	High	LATQSNEITIPVTFESR		1	1	4	P04792	0	1905.99	High	4.58	L
FALSE	High	HGESAWNLENR		1	1	4	P18669	0	1312.6	High	4.58	H
FALSE	High	IGNTGGMLDNILASK		1	1	1	P53396	0	1503.78	High	4.58	I
FALSE	High	VTEGLVDVILYHQPDDK		1	1	2	O43390	0	1941	High	4.58	V
FALSE	High	SQNIVTDSSSLSAEAIR		1	1	1	Q01082	0	1777.89	High	4.57	S
FALSE	High	SNASTLESHETEEPAAK		1	1	1	Q9UJA5	0	1800.82	High	4.57	S
FALSE	High	NDVLDSLGISPDLLPEDFVR		1	1	2	Q9UBE0	0	2214.13	High	4.57	N
FALSE	High	LAENFCVCHLATGDMLR	2xCarbamidomethyl [C6; C8]	1	1	1	P54819	0	2006.92	High	4.57	L
FALSE	High	SSILLDVKPWDDETDMAK		1	1	4	P24534	0	2063	High	4.57	S
FALSE	High	ILDSVGIEADDDRLNK		1	1	5	P05387	1	1772.9	High	4.57	I
FALSE	High	AIVAIENPADVSVISSR		1	1	7	P08865	0	1740.95	High	4.57	A
FALSE	High	LGIYDADGDGDFDVDDAK		1	1	2	Q12797	0	1900.81	High	4.57	L
FALSE	High	IDNSQVESGSLEDDWDFLPPKK		1	1	5	P27797	1	2519.19	High	4.57	I
FALSE	High	MTELETAMGMIIDVFSR	1xAcetyl [N-Term]	1	1	1	P25815	0	1985.94	High	4.57	M
FALSE	High	VDVSAPDVEAHGPEWNLK		1	1	1	Q09666	0	1962.96	High	4.57	V
FALSE	High	AEDGSVIDYELIDQDAR		1	1	6	P07355	0	1908.88	High	4.56	A
FALSE	High	TLTAAAVSGAQPILSK		1	1	1	O60664	0	1527.87	High	4.56	T
FALSE	High	QLIYNYPEQLFGAAGVMAIEHADFAGVER		1	1	1	P78371	0	3209.57	High	4.56	Q
FALSE	High	GSLESPATDVFGSTEEGEK		1	1	1	O00232	0	1939.88	High	4.56	G
FALSE	High	RLAPEYEAAATR		1	1	2	P30101	1	1347.7	High	4.56	R
FALSE	High	ATESGAQSAPLPMEGVDISPK		1	1	2	Q02790	0	2085.02	High	4.56	A
FALSE	High	TGTAEMSSILEER		1	1	3	P25705	0	1423.67	High	4.56	T
FALSE	High	HYGPGWVSMANAGK		1	1	2	P23284	0	1474.69	High	4.56	H
FALSE	High	KPVVNIITPSHVEER		1	1	1	Q16719	0	1717.96	High	4.56	K
FALSE	High	ELESQISELQEDLESER		1	1	2	P35579	0	2033.95	High	4.56	E
FALSE	High	ADLLLSTQPGREEGSPLELER		1	1	2	P08195	1	2310.19	High	4.56	A
FALSE	High	HPVTGQFLYQDSNWASK		1	1	1	P02786	0	1977.95	High	4.55	H
FALSE	High	MQNDAGEFVDLYVPR	1xAcetyl [N-Term]	1	1	6	P63220	0	1795.83	High	4.55	M
FALSE	High	TDTLQIEDFLEETLGPPDFPSLAPR		1	1	2	O95833	0	2801.39	High	4.55	T
FALSE	High	TLSSSTQASIEIDSLYEGIDFYTSITR		1	1	6	P11142	0	2997.46	High	4.55	T
FALSE	High	HPDSHQLFIGNLPHEVDK		1	1	1	Q13283	0	2083.04	High	4.55	H
FALSE	High	DSEMGQQSLLFQIDYPEIAEGIMPR		1	1	1	Q15428	0	2867.36	High	4.55	D
FALSE	High	AITIANQTNCPLYITK	1xCarbamidomethyl [C10]	1	1	1	Q16555	0	1820.96	High	4.55	A
FALSE	High	AGAGSATLSMAYAGAR		1	1	1	P40926	0	1454.71	High	4.55	A
FALSE	High	KREDCSPADKPYIDEAR	1xCarbamidomethyl [C5]	1	1	1	Q96DG6	2	2049.97	High	4.55	K
FALSE	High	LGGSLADSYLDEGFLLDK		1	1	2	P78371	0	1912.95	High	4.55	L
FALSE	High	NVIFEISPTEEVGDFEVK		1	1	2	P46940	0	2052.02	High	4.55	N
FALSE	High	DEENNPLETEYGLSVYK		1	1	2	P25205	0	1999.91	High	4.55	D
FALSE	High	VAVNDAHLLQYNHR		1	1	3	P17931	0	1649.85	High	4.55	V
FALSE	High	DAEDAMDAMDGAVLDGR		1	1	2	Q01130	0	1751.72	High	4.55	D
FALSE	High	SLHDALCVLAQTVK	1xCarbamidomethyl [C7]	1	1	1	P78371	0	1554.83	High	4.55	S
FALSE	High	GVDEVTIVNILTNR		1	1	12	P07355	0	1542.85	High	4.55	G
FALSE	High	LEEMINELAVAMTAVK		1	1	1	Q15363	0	1761.91	High	4.55	L
FALSE	High	VLQHYQESDKGEELGPGNVQK		1	1	1	Q9Y6C9	1	2355.16	High	4.55	V
FALSE	High	VTTMDAELEFAIQPNTTGK		3	3	4	P35241; P26038; P15311	0	2066.01	High	4.55	V
FALSE	High	SENGLEFTSSGSANTETTK		1	1	2	P21796	0	1959.88	High	4.54	S
FALSE	High	ASFITPVPGGVGPMTVAMLMQSTVESAK		1	1	1	P11586	0	2806.42	High	4.54	A
FALSE	High	IVENSDAVTEILNNAELLK		1	1	1	Q16401	0	2085.11	High	4.54	I
FALSE	High	VGDAIPAVEVFEGEPGNK		1	1	5	P30044	0	1827.91	High	4.54	V
FALSE	High	DQFPEVYVPTVFENYIADIEVDGK		1	1	3	P08134	0	2787.34	High	4.54	D
FALSE	High	NALVSHLDGTTPVCEDIGR	1xCarbamidomethyl [C14]	1	1	1	P31930	0	2054	High	4.54	N
FALSE	High	FYPEDVSEELIQDITQR		1	1	17	P26038	0	2082	High	4.54	F
FALSE	High	EEIQSSISGVTAAYNR		1	1	1	P46940	0	1724.84	High	4.54	E
FALSE	High	AHSSMVGVNLPQK		1	1	4	P00558	0	1367.71	High	4.54	A
FALSE	High	FVINYDYPNSSEDYIHR		1	1	1	P17844	0	2131.97	High	4.54	F
FALSE	High	ILAIGLINEALDEGDAQK		1	1	4	P46940	0	1883.01	High	4.54	I
FALSE	High	TPLSEAEFEEIMNR		1	1	1	Q16630	0	1665.78	High	4.54	T
FALSE	High	EAIETIVAAMSNLVPPVELANPENQFR		1	2	6	Q5JWF2	0	2952.51	High	4.54	E
FALSE	High	YFILPDSLPLDTLLVDVEPK		1	1	13	P62314	0	2287.25	High	4.54	Y
FALSE	High	VLTAEELNAAQTSVAYGCIK	1xCarbamidomethyl [C18]	1	1	1	P54136	0	2138.08	High	4.54	V
FALSE	High	HVGDLGNVTADK		1	1	3	P00441	0	1225.62	High	4.54	H
FALSE	High	GDIPDLSQAPSSLLDALEQHLASLEGK		1	1	2	Q13492	0	2804.43	High	4.54	G
FALSE	High	QAVTNPNNTFYATK		1	1	3	P38646	0	1568.77	High	4.54	Q
FALSE	High	LGDAVEQGVINNTVLGYFIGR		1	1	1	P41250	0	2235.18	High	4.54	L
FALSE	High	KVEEAEPEEFVVEK		1	1	3	Q13185	1	1661.83	High	4.53	K
FALSE	High	EEENVGIDITEPLYMQR		1	1	1	P33991	0	2035.96	High	4.53	E
FALSE	High	AVCMLSNTTAVAEAWAR	1xCarbamidomethyl [C3]	1	1	3	Q9BQE3	0	1850.89	High	4.53	A
FALSE	High	LFVGNLPPDITEEEMR		1	1	11	Q15233	0	1859.92	High	4.53	L
FALSE	High	VNQIGSVTESLQACK	1xCarbamidomethyl [C14]	1	2	14	P06733	0	1633.82	High	4.53	V
FALSE	High	TYFPHFDLSHGSAQVK		1	1	5	P69905	0	1833.89	High	4.53	T
FALSE	High	TAVDSGIPLLTNFQVTK		1	1	4	P31327	0	1803.99	High	4.53	T
FALSE	High	INEELESQYQQSMDSK		1	1	1	O00193	0	1928.85	High	4.53	I
FALSE	High	KFDPMGQQTCSAHPAR	1xCarbamidomethyl [C10]	1	1	2	Q9NPE3	1	1830.84	High	4.53	K
FALSE	High	VFQSSANYAENFIQSIISTVEPAQR		1	1	5	P36871	0	2799.39	High	4.53	V
FALSE	High	AMGIMNSFVNDIFER	1xOxidation [M]	2	14	23	Q16778; Q5QNW6	0	1759.81	High	4.53	A
FALSE	High	ADEDPIMGFHQMFLLK		1	1	2	P61970	0	1891.91	High	4.53	A
FALSE	High	DADDNCVTVCNMENVDAMGVHTGDSVVVAPAQTLSNAEFQMLR	2xCarbamidomethyl [C6; C10]	1	1	3	P31327	0	4681.07	High	4.53	D
FALSE	High	GAGTNEDALIEILTTR		1	1	2	P12429	0	1673.87	High	4.52	G
FALSE	High	MGPLGLDHMASSIER		1	1	2	P52272	0	1613.78	High	4.52	M
FALSE	High	DPVQEAWAEDVDLR		1	1	9	P14618	0	1642.77	High	4.52	D
FALSE	High	AVCMLSNTTAIAEAWAR	1xCarbamidomethyl [C3]	2	6	7	Q71U36; P68366	0	1864.9	High	4.52	A
FALSE	High	GENSWFSTQVDTVATK		1	1	2	P08195	0	1769.83	High	4.52	G
FALSE	High	FLTAVNLEHPEMLEK		1	1	1	Q9Y2Q3	0	1770.91	High	4.52	F
FALSE	High	LPRPPPPEMPESLK		1	1	4	Q00325	0	1587.86	High	4.52	L
FALSE	High	EQTGATASVIYVPPPFAAAAINEAIEAEIPLVVCITEGIPQQDMVR	1xCarbamidomethyl [C34]	1	1	1	P53597	0	4879.49	High	4.52	E
FALSE	High	EEGPYEVEVTYDGVPVPGSPFPLEAVAPTKPSK		1	1	1	P21333	0	3485.74	High	4.51	E
FALSE	High	LLQDSVDFSLADAINTEFK		1	1	9	P08670	0	2126.07	High	4.51	L
FALSE	High	HWILPQDYDHAQAEAR		1	1	2	Q15293	0	1949.93	High	4.51	H
FALSE	High	SSYDVFQLEFNDGAYNIK		1	1	1	Q16658	0	2109.98	High	4.51	S
FALSE	High	EAVFPFQPGSVAEVCITFDQANLTVK	1xCarbamidomethyl [C15]	1	1	1	P09382	0	2867.43	High	4.51	E
FALSE	High	ISIEMNGTLEDQLSHLK		1	1	1	O43707	0	1927.98	High	4.51	I
FALSE	High	GNLGAGNGNLQGPR		1	1	1	P43243	0	1324.67	High	4.51	G
FALSE	High	LCSLLDSEDYNTCEGAFGALQK	2xCarbamidomethyl [C2; C13]	1	1	1	Q92973	0	2491.11	High	4.51	L
FALSE	High	YPIEHGIITNWDDMEK		1	4	18	P68133	0	1960.91	High	4.51	Y
FALSE	High	LDVGNFSWGSECCTR	2xCarbamidomethyl [C12; C13]	1	1	3	P62241	0	1787.75	High	4.51	L
FALSE	High	ILATPPQEDAPSVDIANIR		1	1	7	P29401	0	2020.07	High	4.51	I
FALSE	High	VGQAVDVVGQAGKPK		1	1	1	Q13200	0	1452.82	High	4.51	V
FALSE	High	MVNPTVFFDIAVDGEPLGR		1	1	7	P62937	0	2077.04	High	4.51	M
FALSE	High	DDVAQTDLLQIDPNFGSK		1	1	5	P08195	0	1975.96	High	4.51	D
FALSE	High	HHAAYVNNLNVTEEK		1	1	2	P04179	0	1738.85	High	4.51	H
FALSE	High	GLGTDEDSLIEIICSR	1xCarbamidomethyl [C14]	1	2	16	P07355	0	1777.86	High	4.51	G
FALSE	High	LQQELDDLLVDLDHQR		1	1	2	P35579	0	1949.99	High	4.5	L
FALSE	High	EPLFGISTGNLITGLAAGAK		1	1	2	P31327	0	1930.06	High	4.5	E
FALSE	High	HSQFIGYPITLYLEK		1	3	34	P08238	0	1808.96	High	4.5	H
FALSE	High	GSITSVQAIYVPADDLTDPAPATTFAHLDATTVLSR		1	1	4	P06576	0	3714.89	High	4.5	G
FALSE	High	DMIILPEMVGSMVGVYNGK		1	1	13	P62841	0	2053.02	High	4.5	D
FALSE	High	MEDSASASLSSAAATGTSTSTPAAPTAR	1xAcetyl [N-Term]	1	1	1	O76021	0	2639.21	High	4.5	M
FALSE	High	DPELWGSVLLESNPYR		1	1	1	Q00610	0	1874.93	High	4.5	D
FALSE	High	GTVVYGEPITASLGTDGSHYWSK		1	1	1	Q16555	0	2425.17	High	4.5	G
FALSE	High	VIPATDLSEQISTAGTEASGTGNMK		1	1	1	P06737	0	2478.2	High	4.5	V
FALSE	High	MDATANDVPSPYEVR		1	1	4	P30101	0	1664.76	High	4.49	M
FALSE	High	DLGLPTEAYISVEEVHDDGTPTSK		1	1	1	P51665	0	2573.23	High	4.49	D
FALSE	High	MDIDAPDVEVQGPDWHLK		1	1	1	Q09666	0	2064.97	High	4.49	M
FALSE	High	IWCFGPDGTGPNILTDITK	1xCarbamidomethyl [C3]	1	1	21	P13639	0	2105.04	High	4.49	I
FALSE	High	EEIVQFFSGLEIVPNGITLPVDFQGR		1	1	2	P31943	0	2904.51	High	4.49	E
FALSE	High	LMSANASDLPLSIECFMNDVDVSGTMNR	1xCarbamidomethyl [C15]	1	1	3	P34932	0	3087.39	High	4.49	L
FALSE	High	DQEGQDVLLFIDNIFR		1	1	7	P06576	0	1921.97	High	4.49	D
FALSE	High	AIAELGIYPAVDPLDSTSR		1	1	7	P06576	0	1988.03	High	4.49	A
FALSE	High	GCNIENACYPLGICAER	3xCarbamidomethyl [C2; C8; C14]	1	1	1	P32320	0	1996.87	High	4.49	G
FALSE	High	YAICSALAASALPALVMSK	1xCarbamidomethyl [C4]	1	1	3	P36578	0	1937.02	High	4.49	Y
FALSE	High	IYLTADNLVLNLQDESFTR		1	1	1	Q99623	0	2225.14	High	4.49	I
FALSE	High	DLISHDEMFSDIYK		1	1	4	P13693	0	1712.78	High	4.49	D
FALSE	High	MDELFPLIFPAEPAQASGPYVEIIEQPK	1xAcetyl [N-Term]	1	1	1	Q04206	0	3171.6	High	4.49	M
FALSE	High	DGSIDLVINLPNNNTK		1	1	2	P31327	0	1726.9	High	4.48	D
FALSE	High	QLLCGAAIGTHEDDK	1xCarbamidomethyl [C4]	1	1	1	P12268	0	1627.77	High	4.48	Q
FALSE	High	QVQTSGGLWTECIAQLSPEQQAAIQELLNSA	1xCarbamidomethyl [C12]	1	1	3	O00410	0	3370.66	High	4.48	Q
FALSE	High	VYAAATEDMDCLTFGSPVLMR	1xCarbamidomethyl [C11]	1	1	2	P39748	0	2347.08	High	4.48	V
FALSE	High	AHGGYSVFAGVGER		1	1	2	P06576	0	1406.68	High	4.48	A
FALSE	High	LPYDVTPEQALAHEEVK		1	1	1	P46940	0	1938.98	High	4.48	L
FALSE	High	IAQDLEMYGVNYFSIK		1	1	1	P26038	0	1890.93	High	4.48	I
FALSE	High	GEETPVIVGSALCALEGR	1xCarbamidomethyl [C13]	1	1	1	P49411	0	1857.94	High	4.47	G
FALSE	High	DGSCGVAYVVQEPGDYEVSVK	1xCarbamidomethyl [C4]	1	1	3	P21333	0	2258.03	High	4.47	D
FALSE	High	VMTIAPGLFGTPLLTSLPEK		1	1	9	Q99714	0	2085.17	High	4.47	V
FALSE	High	LLVSNLDFGVSDADIQELFAEFGTLK		1	1	4	Q86V81	0	2841.46	High	4.47	L
FALSE	High	VLALSVETDYTFPLAEK		1	1	11	P05388	0	1896	High	4.47	V
FALSE	High	QITDNIFLTTAEVIAQQVSDK		1	1	1	P48163	0	2334.22	High	4.47	Q
FALSE	High	GQVLNSDELQELYEGLR		1	1	2	O00764	0	1962.98	High	4.47	G
FALSE	High	GLGTDEDTLIEILASR		1	1	7	P04083	0	1702.89	High	4.47	G
FALSE	High	SGCIVNNLAEFTVDPK	1xCarbamidomethyl [C3]	1	1	2	O75369	0	1763.86	High	4.47	S
FALSE	High	FGVPVIADGGIQNVGHIAK		1	1	1	P12268	0	1892.04	High	4.47	F
FALSE	High	DELNADHPFIYIIR		1	1	3	P36952	0	1715.88	High	4.46	D
FALSE	High	VTHAVVTVPAYFNDAQR		1	1	5	P11021	0	1887.97	High	4.46	V
FALSE	High	GAGIGGLGITVEGPSESK		1	1	2	O75369	0	1628.85	High	4.46	G
FALSE	High	SIEIPRPVDGVEVPGCGK	1xCarbamidomethyl [C16]	1	1	2	P26368	0	1908.98	High	4.46	S
FALSE	High	AEPPQCTSLAWSADGQTLFAGYTDNLVR	1xCarbamidomethyl [C6]	1	1	7	P63244	0	3068.44	High	4.46	A
FALSE	High	WFNGQPIHAELSPVTDFR		1	1	1	Q01081	0	2114.05	High	4.46	W
FALSE	High	EITGIGPSTTTETETIAK		1	1	1	O75436	0	1848.94	High	4.46	E
FALSE	High	LTQAQIFDYGEIPNFPR		1	1	3	P00491	0	2009.01	High	4.46	L
FALSE	High	VDNDENEHQLSLR		1	1	6	P06748	0	1568.73	High	4.46	V
FALSE	High	MMDYLQGSGETPQTDVR		1	1	3	Q14697	0	1927.85	High	4.46	M
FALSE	High	MVNPTVFFDIAVDGEPLGR	1xAcetyl [N-Term]	1	1	11	P62937	0	2119.05	High	4.46	M
FALSE	High	VPFCPMVGSEVYSTEIK	1xCarbamidomethyl [C4]	1	1	2	Q9Y265	0	1942.93	High	4.46	V
FALSE	High	ALMLQGVDLLADAVAVTMGPK	1xOxidation [M3]	1	1	5	P10809	0	2129.13	High	4.45	A
FALSE	High	YYGGAEVVDEIELLCQR	1xCarbamidomethyl [C15]	1	1	1	P34897	0	2013.96	High	4.45	Y
FALSE	High	QVELALWDTAGQEDYDR		3	3	1	P08134; P62745; P61586	0	2008.92	High	4.45	Q
FALSE	High	AQGPQQQPGSEGPSYAK		1	1	1	Q3ZCQ8	0	1729.81	High	4.45	A
FALSE	High	MTDQEAIQDLWQWR		1	1	30	P06748	0	1819.84	High	4.45	M
FALSE	High	HTGPNSPDTANDGFVR		2	2	4	P31943; P55795	0	1684.77	High	4.45	H
FALSE	High	WQLSVATEQPELEGPR		1	1	2	Q9NR30	0	1839.92	High	4.45	W
FALSE	High	QYYTLLNQAPDMLHR		1	1	1	Q13283	0	1862.92	High	4.44	Q
FALSE	High	TEPATGFIDGDLIESFLDISRPK		1	1	1	Q16531	0	2521.28	High	4.44	T
FALSE	High	ENFIPTIVNFSAEEISDAIR		1	1	2	Q14204	0	2265.14	High	4.44	E
FALSE	High	LDTHPAMVTVLEMGAAR		1	1	1	Q12931	0	1811.91	High	4.44	L
FALSE	High	LMDLDVEQLGIPEQEYSCVVK	1xCarbamidomethyl [C18]	1	1	3	P12004	0	2465.19	High	4.44	L
FALSE	High	KQPPVSPGTALVGSQK		1	1	1	P17096	1	1593.9	High	4.44	K
FALSE	High	KDDEENYLDLFSHK		1	1	1	Q07666	1	1752.81	High	4.44	K
FALSE	High	VVVAENFDEIVNNENK		1	1	5	P30101	0	1832.9	High	4.44	V
FALSE	High	NPDDITQEEYGEFYK		1	1	5	P08238	0	1847.8	High	4.44	N
FALSE	High	CTGGEVGATSALAPK	1xCarbamidomethyl [C1]	1	1	3	P30050	0	1418.69	High	4.44	C
FALSE	High	TIGTGLVTNTLAMTEEEK		1	1	1	P49411	0	1907.96	High	4.44	T
FALSE	High	DSNTILLPSNPGDVTSMVAQAMGVYGALTK		1	1	1	Q9UJZ1	0	3050.52	High	4.44	D
FALSE	High	GVAALTSDPAVQAIVLDTASDVLDK		1	1	2	Q9Y490	0	2469.31	High	4.44	G
FALSE	High	TPENYPNAGLTMNYCR	1xCarbamidomethyl [C15]	1	1	2	P00747	0	1900.83	High	4.44	T
FALSE	High	DATNVGDEGGFAPNILENK		1	1	8	P06733	0	1960.92	High	4.43	D
FALSE	High	QLSSSVTGLTNIEEENCQR	1xCarbamidomethyl [C17]	1	1	2	P46940	0	2165.01	High	4.43	Q
FALSE	High	YPIEHGIVTNWDDMEK		1	2	1	P60709	0	1946.9	High	4.43	Y
FALSE	High	QTNPSAMEVEEDDPVPEIR		1	1	3	P55072	0	2155.98	High	4.43	Q
FALSE	High	VADNLAIQLAAVTEDK		1	1	2	Q12906	0	1670.9	High	4.43	V
FALSE	High	FDVFEDFISPTTAAQTLLFTACSK	1xCarbamidomethyl [C22]	1	1	3	O95373	0	2709.31	High	4.43	F
FALSE	High	SQVFSTAADGQTQVEIK		1	1	2	P38646	0	1808.9	High	4.43	S
FALSE	High	SLTPAVPVESKPDKPSGK		1	1	1	P20810	0	1837.01	High	4.43	S
FALSE	High	EATTLANGVLASLNLPAAIEDVSGDTVPQSILTK		1	1	4	Q8WUM4	0	3408.81	High	4.43	E
FALSE	High	TTGLVGLAVCNTPHER	1xCarbamidomethyl [C10]	1	1	1	Q16718	0	1724.87	High	4.43	T
FALSE	High	AMGIMNSFVNDIFER		2	14	43	Q16778; Q5QNW6	0	1743.82	High	4.42	A
FALSE	High	TLAQLNPESSLFIIASK		1	1	6	P06744	0	1832.02	High	4.42	T
FALSE	High	LAQANGWGVMVSHR		1	1	5	P06733	0	1525.77	High	4.42	L
FALSE	High	VPDGKPENEFAFNAEFK		1	1	4	Q15181	0	1938.92	High	4.42	V
FALSE	High	MQQQLDEYQELLDIK		1	1	5	P02545	0	1893.93	High	4.42	M
FALSE	High	TQGFLALFSGDTGEIK		1	1	2	Q9Y230	0	1683.86	High	4.42	T
FALSE	High	TDMDNQIVVSDYAQMDR		1	1	2	P50991	0	2000.87	High	4.42	T
FALSE	High	SVLEDMEDSVLAVMPPDIAAEAQALR		1	1	4	Q7Z6Z7	0	2770.36	High	4.42	S
FALSE	High	VDNSSLTGESEPQTR		1	4	1	P05023	0	1619.75	High	4.42	V
FALSE	High	VAHSFNCTPIEGMLSHQLK	1xCarbamidomethyl [C7]	1	1	2	Q9UQ80	0	2169.06	High	4.42	V
FALSE	High	TQLASWSDPTEETGPVAGILDTETLEK		1	1	1	Q15149	0	2888.4	High	4.42	T
FALSE	High	VNTFSALANIDLALEQGDALALFR		1	1	2	P46940	0	2562.36	High	4.42	V
FALSE	High	ANLQIDQINTDLNLER		1	1	2	P35579	0	1869.97	High	4.41	A
FALSE	High	LIEAEDNMNCQMSNITVTYR	1xCarbamidomethyl [C10]	1	1	1	P62318	0	2402.08	High	4.41	L
FALSE	High	AGYSTDESSSSSLHATR		1	1	1	P51116	0	1755.78	High	4.41	A
FALSE	High	NAPAIIFIDELDAIAPK		1	1	14	P55072	0	1810.99	High	4.41	N
FALSE	High	HLAEHSPYYEAMK		1	1	1	Q12931	0	1575.73	High	4.41	H
FALSE	High	LQALANEQAAAAHELEK		1	1	1	Q86UP2	0	1806.93	High	4.41	L
FALSE	High	GMYGIENEVFLSLPCILNAR	1xCarbamidomethyl [C15]	1	1	7	P07195	0	2296.15	High	4.41	G
FALSE	High	VIGLSSDLQQVGGASAR		1	1	1	O00303	0	1657.89	High	4.41	V
FALSE	High	NEVLMVNIGSLSTGGR		1	2	2	P41091	0	1646.85	High	4.41	N
FALSE	High	RFDDAVVQSDMK		1	1	5	P11142	1	1410.67	High	4.41	R
FALSE	High	GDADQASNILASFGLSAR		1	1	3	P43243	0	1792.88	High	4.41	G
FALSE	High	VVAPTISSPVCQEQLVEAGR	1xCarbamidomethyl [C11]	1	1	2	Q9Y490	0	2140.11	High	4.41	V
FALSE	High	QMAEIAVNAVLTVADMER		1	1	1	P48643	0	1960.98	High	4.41	Q
FALSE	High	RPLRPQVVTDDDGQAPEAK		1	1	2	Q9HDC9	0	2092.08	High	4.41	R
FALSE	High	GISHVIVDEIHER		1	1	1	Q08211	0	1503.79	High	4.41	G
FALSE	High	LEQFVSILMASIPLPDK		1	1	5	P00491	0	1901.05	High	4.4	L
FALSE	High	VTNGAFTGEISPGMIK		1	1	4	P60174	0	1621.83	High	4.4	V
FALSE	High	VFSDEVQQQAQLSTIR		1	1	1	Q9Y262	0	1848.95	High	4.4	V
FALSE	High	IPDQLVILDMK		1	1	3	P49755	0	1284.72	High	4.4	I
FALSE	High	YGINTTDIFQTVDLWEGK		1	1	18	P37802	0	2100.03	High	4.4	Y
FALSE	High	DLTLDQAYSYAVENAK		1	1	2	P23381	0	1800.87	High	4.4	D
FALSE	High	FLSQPFQVAEVFTGHMGK		1	1	11	P06576	0	2023.01	High	4.4	F
FALSE	High	HCNMVLENVK	1xCarbamidomethyl [C2]	1	1	3	P62316	0	1243.59	High	4.4	H
FALSE	High	AVFVDLEPTVIDEVR		2	3	34	Q71U36; Q9BQE3	0	1701.91	High	4.4	A
FALSE	High	KVESLQEEIAFLK		1	1	4	P08670	1	1533.85	High	4.4	K
FALSE	High	AIGSASEGAQSSLQEVYHK		1	1	2	P28066	0	1961.96	High	4.39	A
FALSE	High	LPGELEPVQATQNK		1	1	2	O75821	0	1523.81	High	4.39	L
FALSE	High	IITLEEGDIILTGTPK		1	1	1	Q6P587	0	1712.97	High	4.39	I
FALSE	High	TVAGQDAVIVLLGTR		1	1	1	P30043	0	1512.87	High	4.39	T
FALSE	High	LALVTGGEIASTFDHPELVK		1	1	3	P78371	0	2097.12	High	4.39	L
FALSE	High	EEFTAFLHPEEFEHMK		1	1	2	Q15293	0	2020.91	High	4.39	E
FALSE	High	ESSETPDQFMTADETR		1	1	1	P16070	0	1843.77	High	4.39	E
FALSE	High	QELSHALYQHDAACR	1xCarbamidomethyl [C14]	1	1	3	Q9UMS4	0	1798.83	High	4.39	Q
FALSE	High	RKPDTIEVQQMK		3	3	2	P35241; P26038; P15311	1	1472.79	High	4.39	R
FALSE	High	ENIVEAIIHSPELIR		1	1	2	O95373	0	1732.96	High	4.39	E
FALSE	High	GSYGDLGGPIITTQVTIPK		1	1	6	P61978	0	1917.03	High	4.39	G
FALSE	High	AMEGTIDGSLINPTVIVDPFQILVAANK		1	1	2	Q9Y3C4	0	2926.56	High	4.39	A
FALSE	High	ASGQAFELILSPR		1	1	2	P16949	0	1388.75	High	4.39	A
FALSE	High	IFVGNVSAACTSQELR	1xCarbamidomethyl [C10]	1	1	1	Q96PK6	0	1751.87	High	4.39	I
FALSE	High	SCVEEPEPEPEAAEGDGDKK	1xCarbamidomethyl [C2]	1	1	1	P51858	1	2172.92	High	4.39	S
FALSE	High	MDIDVPDVEVQGPDWHLK		1	1	1	Q09666	0	2093	High	4.38	M
FALSE	High	YWPQEAGEYAVHVLCNSEDIR	1xCarbamidomethyl [C15]	1	1	3	P21333	0	2536.16	High	4.38	Y
FALSE	High	VAGMDVELTVEER		1	1	2	P62258	0	1447.71	High	4.38	V
FALSE	High	DGSCSAEYIPFAPGDYDVNITYGGAHIPGSPFR	1xCarbamidomethyl [C4]	1	1	3	O75369	0	3530.6	High	4.38	D
FALSE	High	EANFTVSSMHGDMPQK		1	1	1	P38919	0	1778.78	High	4.38	E
FALSE	High	METEQPEETFPNTETNGEFGK	1xAcetyl [N-Term]	1	1	3	P61978	0	2457.04	High	4.38	M
FALSE	High	EGPYSISVLYGDEEVPR		1	1	3	P21333	0	1909.92	High	4.38	E
FALSE	High	ATQQQHDFTLTQTADGR		1	1	3	P78527	0	1917.9	High	4.38	A
FALSE	High	TNVNGGAIALGHPLGGSGSR		1	1	1	P42765	0	1834.95	High	4.38	T
FALSE	High	HVFGESDELIGQK		1	1	6	P60174	0	1458.72	High	4.38	H
FALSE	High	VLAVNQENEQLMEDYEK		1	1	1	P12814	0	2051.96	High	4.38	V
FALSE	High	QQSEEDLLLQDFSR		1	1	2	Q9UNL2	0	1707.82	High	4.37	Q
FALSE	High	DVLGMAQDEMAQAFEDWNK		1	1	9	P52209	0	2197.95	High	4.37	D
FALSE	High	QLEAIDQLHLEYAK		1	1	1	O43707	0	1670.87	High	4.37	Q
FALSE	High	YSGAYGASVSDEELK		1	1	1	Q9NX63	0	1575.72	High	4.37	Y
FALSE	High	EIFLSQPILLELEAPLK		2	3	10	P62136; P62140	0	1953.13	High	4.37	E
FALSE	High	EATNPPVIQEEKPK		1	1	3	P30101	0	1579.83	High	4.37	E
FALSE	High	FEIGEGENLDLPYGLER		1	1	3	Q02790	0	1950.94	High	4.37	F
FALSE	High	QLVEQVEQIQK		1	1	1	Q9BVK6	0	1341.74	High	4.37	Q
FALSE	High	ETPEEVAADVLAEVITAAVR		1	1	1	O43823	0	2083.09	High	4.37	E
FALSE	High	VQANLGAPDINIEGLDAK		1	1	1	Q09666	0	1837.97	High	4.37	V
FALSE	High	TLMVDPSQEVQENYNFLLQLQEELLK		1	1	5	Q9Y5B9	0	3121.58	High	4.37	T
FALSE	High	LENYPIPEPGPNEVLLR		1	1	2	Q00796	0	1950.03	High	4.37	L
FALSE	High	EALAQTVLAEVPTQLVSYFR		1	1	6	Q99829	0	2235.2	High	4.37	E
FALSE	High	TGDDYIAIGADEEELGSQIEEAIYQEIR		1	1	3	P23193	0	3127.46	High	4.36	T
FALSE	High	DTNGENIAESLVAEGLATR		1	1	2	Q7KZF4	0	1959.96	High	4.36	D
FALSE	High	NQLTSNPENTVFDAK		1	1	4	P11021	0	1677.81	High	4.36	N
FALSE	High	FTPGTFTNQIQAAFR		1	1	3	P08865	0	1698.86	High	4.36	F
FALSE	High	VLTGVAGEDAECHAAK	1xCarbamidomethyl [C12]	1	1	2	O95373	0	1627.77	High	4.36	V
FALSE	High	RGPCIIYNEDNGIIK	1xCarbamidomethyl [C4]	1	1	3	P36578	1	1761.9	High	4.36	R
FALSE	High	LLETTDRPDGHQNNLR		1	1	2	Q14974	0	1878.94	High	4.36	L
FALSE	High	LTTLPSDFCGLTHLVK	1xCarbamidomethyl [C9]	1	1	1	Q96AG4	0	1801.95	High	4.36	L
FALSE	High	VLFASQEIPASPFR		1	1	2	O75369	0	1561.84	High	4.36	V
FALSE	High	TILSNQTVDIPENVDITLK		1	1	5	P32969	0	2113.14	High	4.36	T
FALSE	High	DLADELALVDVIEDK		1	1	26	P00338	0	1657.85	High	4.36	D
FALSE	High	EQMDNAVYTFETLLHQELGK		1	1	2	Q96TA1	0	2366.13	High	4.36	E
FALSE	High	ITENIGCVMTGMTADSR	1xCarbamidomethyl [C7]	1	1	2	P60900	0	1855.83	High	4.36	I
FALSE	High	TIESILEPVAQQISHLVIMHEEGEVDGK		1	1	2	P18206	0	3101.58	High	4.36	T
FALSE	High	DVDIIDHHDNTYTVK		1	1	2	P21333	0	1784.84	High	4.36	D
FALSE	High	SKPGAAMVEMADGYAVDR		1	1	2	P14866	0	1867.87	High	4.36	S
FALSE	High	NSTGSQDGPVSNPSSSNSSQDSLHK		1	1	1	Q13136	0	2517.11	High	4.35	N
FALSE	High	DQMQQQLNDYEQLLDVK		1	1	3	P20700	0	2108	High	4.35	D
FALSE	High	FSHEEIAMATVTALR		1	1	4	P04075	0	1675.85	High	4.35	F
FALSE	High	TITLEVEPSDTIENVK		1	4	12	P62979	0	1787.93	High	4.35	T
FALSE	High	GDPQVYEELFSYSCPK	1xCarbamidomethyl [C14]	1	1	1	Q9Y262	0	1918.85	High	4.35	G
FALSE	High	LLLQGEADQSLLTFIDK		1	1	1	P78527	0	1904.04	High	4.35	L
FALSE	High	ASMQQQQQLASAR		1	1	1	Q9Y3Y2	0	1446.71	High	4.35	A
FALSE	High	IVAFADAAVEPIDFPIAPVYAASMVLK		1	1	4	P24752	0	2818.51	High	4.35	I
FALSE	High	QEGIATSDNFMQAFLNVLDQCPK	1xCarbamidomethyl [C21]	1	1	1	P78344	0	2626.23	High	4.35	Q
FALSE	High	TFITSDFMTGIPATPGNEIPVEVVLK		1	1	6	P49915	0	2776.45	High	4.35	T
FALSE	High	AAGVNVEPFWPGLFAK		1	1	10	P05386	0	1702.9	High	4.35	A
FALSE	High	VLAQNSGFDLQETLVK		1	1	2	P40227	0	1761.94	High	4.35	V
FALSE	High	VDNIQAGELTEGIWR		1	1	2	Q08945	0	1700.86	High	4.35	V
FALSE	High	LQEAGILSAEELQR		1	1	2	Q15149	0	1556.83	High	4.35	L
FALSE	High	TIGGGDDSFNTFFSETGAGK		2	5	14	Q71U36; Q9BQE3	0	2007.89	High	4.35	T
FALSE	High	QSGEAFVELGSEDDVK		1	1	2	P52597	0	1709.79	High	4.35	Q
FALSE	High	VGEVTYVELLMDAEGK		1	1	2	P52272	0	1752.87	High	4.34	V
FALSE	High	ETTDTDTADQVIASFK		1	1	2	O43707	0	1741.81	High	4.34	E
FALSE	High	RSAEEEAADLPTKPTK		1	1	1	Q8WW12	1	1742.89	High	4.34	R
FALSE	High	LGDVYVNDAFGTAHR		1	2	5	P00558	0	1634.79	High	4.34	L
FALSE	High	VNDTIQIDLETGK		1	1	3	P62701	0	1445.75	High	4.34	V
FALSE	High	TDYNASVSVPDSSGPER		1	1	3	P61978	0	1780.8	High	4.34	T
FALSE	High	SPFTVGVAAPLDLSK		1	1	3	O75369	0	1501.83	High	4.34	S
FALSE	High	SGAQASSTPLSPTR		1	1	2	P02545	0	1359.69	High	4.34	S
FALSE	High	DHINLPGFSGQNPLR		1	1	1	P00491	0	1664.85	High	4.34	D
FALSE	High	LDGLVETPTGYIESLPR		1	1	4	P55209	0	1859.97	High	4.34	L
FALSE	High	LNLEHIATSSAVSK		1	1	1	Q96QK1	0	1469.8	High	4.34	L
FALSE	High	QAQIEVVPSASALIIK		1	1	6	P30050	0	1666.97	High	4.34	Q
FALSE	High	NVTELNEPLSNEER		1	1	2	P61981	0	1643.79	High	4.34	N
FALSE	High	SPYTVTVGQACNPSACR	2xCarbamidomethyl [C11; C16]	1	1	2	P21333	0	1867.84	High	4.33	S
FALSE	High	GPFVEAEVPDVDLECPDAK	1xCarbamidomethyl [C15]	1	1	1	Q09666	0	2086.96	High	4.33	G
FALSE	High	SPASDTYIVFGEAK		1	2	3	Q13765	0	1484.73	High	4.33	S
FALSE	High	LLQTDDEEEAGLLELLK		1	1	3	P55060	0	1929.01	High	4.33	L
FALSE	High	GYIWNYGAIPQTWEDPGHNDK		1	1	1	Q15181	0	2461.12	High	4.33	G
FALSE	High	VGTGEPCCDWVGDEGAGHFVK	2xCarbamidomethyl [C7; C8]	1	1	2	P52209	0	2276.97	High	4.33	V
FALSE	High	VLAAQETHEGVTEDGIEDAFEVLGEIQEIVK		1	1	3	P35606	0	3368.67	High	4.33	V
FALSE	High	VLETPQEIHTVSSEAVSLLEEVITPR		1	1	3	Q9H0A0	0	2876.53	High	4.33	V
FALSE	High	VSASPLLYTLIEK		1	1	3	P02786	0	1433.83	High	4.33	V
FALSE	High	NLVSEAIAAGIFNDLGSGSNIDLCVISK	1xCarbamidomethyl [C24]	1	1	2	Q99436	0	2877.47	High	4.33	N
FALSE	High	MLPTIIADNAGYDSADLVAQLR		1	1	9	P78371	0	2347.2	High	4.33	M
FALSE	High	VFVGGLSPDTSEEQIK		1	1	3	O14979	0	1705.86	High	4.33	V
FALSE	High	TSSAETPTIPLGSAVEAIK		1	1	2	Q16891	0	1872	High	4.33	T
FALSE	High	TIRPMDMETIEASVMK		1	1	1	P11177	0	1851.9	High	4.33	T
FALSE	High	RPAEDMEEEQAFK		1	1	4	P61978	0	1579.71	High	4.32	R
FALSE	High	AASDIAMTELPPTHPIR		1	1	3	P62258	0	1819.94	High	4.32	A
FALSE	High	YGIICMEDLIHEIYTVGK	1xCarbamidomethyl [C5]	1	1	9	P18124	0	2154.06	High	4.32	Y
FALSE	High	GDVPSVGLEGPDVDLQGPEAK		1	1	1	Q09666	0	2079.02	High	4.32	G
FALSE	High	AQAEAQQPTFDALRDELR		1	1	1	Q15149	1	2059.02	High	4.32	A
FALSE	High	QGGGGGGGSVPGIER		1	1	2	P52272	0	1284.63	High	4.32	Q
FALSE	High	TDAPQPDVKEEEEEK		1	1	1	P27824	1	1743.79	High	4.32	T
FALSE	High	DAQVVQVVLDGLSNILK		1	1	7	O00629	0	1811.03	High	4.32	D
FALSE	High	VEYHFLSPYVSPK		1	1	2	P02786	0	1565.8	High	4.32	V
FALSE	High	ESLNASIVDAINQAADCWGIR	1xCarbamidomethyl [C17]	1	1	2	Q9UJZ1	0	2303.11	High	4.32	E
FALSE	High	LEAELGNMQGLVEDFK		1	1	21	P05787	0	1792.88	High	4.32	L
FALSE	High	IMLFTNEDNPHGNDSAK		1	1	2	P12956	0	1902.87	High	4.32	I
FALSE	High	EDVGTVVGIDLGTTYSCVGVFK	1xCarbamidomethyl [C17]	1	1	1	P11021	0	2316.14	High	4.32	E
FALSE	High	LVAGEMGQNEPDQGGQR		1	1	3	Q99714	0	1785.82	High	4.32	L
FALSE	High	AEAGAGSATEFQFR		1	2	3	P46783	0	1441.67	High	4.32	A
FALSE	High	WPLPPIVDYSQTDFSQLLNCPEFVPR	1xCarbamidomethyl [C20]	1	1	2	Q6PKG0	0	3118.53	High	4.31	W
FALSE	High	NCLTNFHGMDLTR	1xCarbamidomethyl [C2]	1	1	4	P61247	0	1578.72	High	4.31	N
FALSE	High	LGADAVGMSTVPEVIVAR		1	1	1	P00491	0	1784.96	High	4.31	L
FALSE	High	MALELLTQEFGIPIER		1	1	6	P49588	0	1859.99	High	4.31	M
FALSE	High	AFLDALQNQAEASSK		1	1	2	Q12931	0	1592.79	High	4.31	A
FALSE	High	LEGLIQPDDLINQLTFIMDANQTYLVSER		1	1	2	Q96CS3	0	3349.7	High	4.31	L
FALSE	High	QSLGELIGTLNAAK		1	1	3	P60174	0	1414.79	High	4.31	Q
FALSE	High	DKPHVNVGTIGHVDHGK		1	1	2	P49411	0	1809.94	High	4.31	D
FALSE	High	QVLVAPGNAGTACSEK	1xCarbamidomethyl [C13]	1	1	2	P22102	0	1601.8	High	4.31	Q
FALSE	High	GEVITTYCPANNEPIAR	1xCarbamidomethyl [C8]	1	1	1	P49419	0	1904.92	High	4.31	G
FALSE	High	LDNVPHTPSSYIETLPK		1	1	1	Q99733	0	1910.99	High	4.31	L
FALSE	High	MRPGVACSVSQAQK	1xCarbamidomethyl [C7]	1	1	2	P32969	0	1518.75	High	4.31	M
FALSE	High	YINENLIVNTDELGR		1	1	2	P17987	0	1762.9	High	4.31	Y
FALSE	High	GTGVVTSVPSDSPDDIAALR		1	1	1	Q9P2J5	0	1956.99	High	4.31	G
FALSE	High	SDSFENPVLQQHFR		1	1	3	P12956	0	1703.81	High	4.31	S
FALSE	High	SEDFGVNEDLADSDAR		1	1	3	P04083	0	1739.74	High	4.31	S
FALSE	High	RDIQENDEEAVQVK		1	1	1	O00231	1	1672.81	High	4.31	R
FALSE	High	LLAVAATAPPDAPNREEVFDER		1	1	2	P18206	1	2381.21	High	4.31	L
FALSE	High	YDAFGEDSSSAMGVENR		1	1	1	Q9Y2X3	0	1834.75	High	4.3	Y
FALSE	High	TYDATTHFETTCDDIK	1xCarbamidomethyl [C12]	1	1	2	P50395	0	1917.82	High	4.3	T
FALSE	High	VIHLSNLPHSGYSDSAVLK		1	1	1	P43243	0	2037.08	High	4.3	V
FALSE	High	TGENVEDAFLEAAK		1	1	2	P61106	0	1493.71	High	4.3	T
FALSE	High	LLPQLTYLDGYDRDDK		1	1	3	P39687	1	1924.97	High	4.3	L
FALSE	High	LSFQHDPETSVLVLR		1	1	3	Q14697	0	1740.93	High	4.3	L
FALSE	High	LVVDLTDIDPDVAYSSVPYEK		1	1	2	P09960	0	2338.17	High	4.3	L
FALSE	High	NLFEDQNTLTSICEK	1xCarbamidomethyl [C13]	1	1	2	P55060	0	1811.85	High	4.3	N
FALSE	High	TPCNAGTFSQPEK	1xCarbamidomethyl [C3]	1	1	1	O43684	0	1436.65	High	4.3	T
FALSE	High	MEAVLTEELDEEEQLLR	1xAcetyl [N-Term]	1	1	2	Q8N6M0	0	2089	High	4.3	M
FALSE	High	GVVPLAGTNGETTTQGLDGLSER		1	1	5	P04075	0	2272.14	High	4.3	G
FALSE	High	ASLNGADIYSGCCTLK	2xCarbamidomethyl [C12; C13]	1	1	2	P14866	0	1729.79	High	4.29	A
FALSE	High	NQEQLAAELAEFTAK		1	1	1	P35241	0	1662.83	High	4.29	N
FALSE	High	GAVAEDGDELRTEPEAK		1	1	1	P27695	1	1786.85	High	4.29	G
FALSE	High	LSVLDLVVALAPCADEAAISK	1xCarbamidomethyl [C13]	1	1	3	Q5JTH9	0	2155.17	High	4.29	L
FALSE	High	HTLSYVDVGTGK		1	1	1	P31040	0	1276.65	High	4.29	H
FALSE	High	VDQSILTGESVSVIK		1	2	1	P16615	0	1574.86	High	4.29	V
FALSE	High	IDINMSGFNETDDLK		1	1	2	P13797	0	1711.78	High	4.29	I
FALSE	High	VQNGAEQDLVQTLSCLSMIITPAFAELK	1xCarbamidomethyl [C15]	1	1	1	Q9P289	0	3076.57	High	4.29	V
FALSE	High	ELDLSNNCLGDAGILQLVESVR	1xCarbamidomethyl [C8]	1	1	3	P13489	0	2415.22	High	4.28	E
FALSE	High	IINEPTAAAIAYGLDR		1	2	5	P0DMV9	0	1687.9	High	4.28	I
FALSE	High	MEGDAVEAIVEESETFIK	1xAcetyl [N-Term]	1	1	1	P49711	0	2038.95	High	4.28	M
FALSE	High	EKPSYDTETDPSEGLMNVLK		1	1	1	Q9HB71	0	2253.06	High	4.28	E
FALSE	High	LAAVDATVNQVLASR		1	1	5	Q15084	0	1527.85	High	4.28	L
FALSE	High	NQDATVYVGGLDEK		1	1	1	Q15427	0	1508.72	High	4.28	N
FALSE	High	VWGNVGTVEWADPIEDPDPEVMAK		1	1	2	O60506	0	2654.24	High	4.28	V
FALSE	High	IQDVGLVPMGGVMSGAVPAAAAQEAVEEDIPIAK		1	1	4	P52815	0	3333.71	High	4.28	I
FALSE	High	DDPSAMDFVTSAANLR		1	1	1	Q9UBT2	0	1709.78	High	4.28	D
FALSE	High	TIGGGDDSFTTFFCETGAGK	1xCarbamidomethyl [C14]	1	1	2	P68366	0	2067.9	High	4.28	T
FALSE	High	IANLQTDLSDGLR		1	1	2	P21333	0	1415.75	High	4.28	I
FALSE	High	DGSDYEGWCWPGSAGYPDFTNPTMR	1xCarbamidomethyl [C9]	1	1	3	Q14697	0	2866.15	High	4.28	D
FALSE	High	TEFLSFMNTELAAFTK		1	1	23	P31949	0	1849.9	High	4.28	T
FALSE	High	TDVCVFAAQEDLETMQAFAQVFNK	1xCarbamidomethyl [C4]	1	1	3	Q7L1Q6	0	2762.28	High	4.28	T
FALSE	High	SVGGLVAQQQCVGPLQTPLADVAVVALSHEELIGAATALGEQPVK	1xCarbamidomethyl [C11]	1	1	1	O15067	0	4521.4	High	4.28	S
FALSE	High	SAYDSTMETMNYAQIR		1	1	1	P53396	0	1880.82	High	4.27	S
FALSE	High	YITSLNEDSTVHGFLVQLPLDSENSINTEEVINAIAPEK		1	1	4	P11586	0	4300.15	High	4.27	Y
FALSE	High	DSYLILETLPTEYDSR		1	1	1	P17980	0	1914.93	High	4.27	D
FALSE	High	HTDNVIQWLNAMDEIGLPK		1	1	5	P46940	0	2194.1	High	4.27	H
FALSE	High	NAVTQFVSSMSASADVLALAK		1	2	2	P47985	0	2110.08	High	4.27	N
FALSE	High	IHFPLATYAPVISAEK		3	6	51	Q71U36; Q9BQE3; P68366	0	1756.96	High	4.27	I
FALSE	High	MEYLIGIQGPDYVLVASDR	1xAcetyl [N-Term]	1	1	5	P49721	0	2181.09	High	4.27	M
FALSE	High	AITIAGVPQSVTECVK	1xCarbamidomethyl [C14]	1	1	3	Q15365	0	1672.89	High	4.27	A
FALSE	High	VGNLGLATSFFNER		1	1	2	O00571	0	1524.78	High	4.27	V
FALSE	High	GPVFAPPYEPLPENVK		1	1	2	P11387	0	1753.92	High	4.27	G
FALSE	High	NPFGNAGLLLGEAGK		1	1	2	P49748	0	1457.77	High	4.27	N
FALSE	High	NQVALNPQNTVFDAK		1	1	3	P0DMV9	0	1658.85	High	4.27	N
FALSE	High	KSDVEAIFSK		1	4	3	P07910	1	1123.6	High	4.26	K
FALSE	High	ELDALDANDELTPLGR		1	1	3	Q08211	0	1741.86	High	4.26	E
FALSE	High	GMQELGVHPDQETYTDYVIPCFDSVNSAR	1xCarbamidomethyl [C21]	1	1	1	P42704	0	3328.49	High	4.26	G
FALSE	High	LSLDGQNIYNACCTLR	2xCarbamidomethyl [C12; C13]	1	1	3	P26599	0	1897.89	High	4.26	L
FALSE	High	ELAQQVQQVAAEYCR	1xCarbamidomethyl [C14]	1	1	2	P17844	0	1792.86	High	4.26	E
FALSE	High	GFQEVVTPNIFNSR		1	1	2	P26639	0	1607.82	High	4.26	G
FALSE	High	LYGSAGPPPTGEEDTAEK		1	1	3	P11021	0	1818.84	High	4.26	L
FALSE	High	DETVSDCSPHIANIGR	1xCarbamidomethyl [C7]	1	1	1	P47756	0	1770.81	High	4.26	D
FALSE	High	LEPQIASASEYAHR		1	1	2	O60664	0	1571.78	High	4.26	L
FALSE	High	SDALETLGFLNHYQMK		1	1	2	P14866	0	1866.91	High	4.26	S
FALSE	High	LITVNTPDLVLFVGEALVGNEAVDQLVK		1	1	2	P08240	0	2966.64	High	4.26	L
FALSE	High	SPQPPVEEEDEHFDDTVVCLDTYNCDLHFK	2xCarbamidomethyl [C19; C25]	1	1	1	Q00839	0	3635.56	High	4.26	S
FALSE	High	IGIIGGTGLDDPEILEGR		1	1	2	Q13126	0	1824.97	High	4.26	I
FALSE	High	AGVNTVTTLVENKK		1	1	2	P62424	1	1473.83	High	4.26	A
FALSE	High	VFEPNEEALGVVLHK		1	1	1	O43615	0	1680.9	High	4.25	V
FALSE	High	LAMQEFMILPVGAANFR		1	1	26	P06733	0	1907.99	High	4.25	L
FALSE	High	DMAIATGGAVFGEEGLTLNLEDVQPHDLGK		1	1	2	P10809	0	3097.51	High	4.25	D
FALSE	High	TLLEGSGLESIISIIHSSLAEPR		1	1	2	P49327	0	2422.32	High	4.25	T
FALSE	High	AVTEQGAELSNEER		1	1	3	P27348	0	1532.72	High	4.25	A
FALSE	High	ALNALCDGLIDELNQALK	1xCarbamidomethyl [C6]	1	1	2	P30084	0	1971.02	High	4.25	A
FALSE	High	VGAEDADGIDMAYR		1	1	2	P49588	0	1482.65	High	4.25	V
FALSE	High	IDNLIDPGSPFLELSQFAGYQLYDNEEVPGGGIITGIGR		1	1	1	Q9HCC0	0	4165.08	High	4.25	I
FALSE	High	HLPTLDHPIIPADYVAIK		1	1	6	P31327	0	2013.12	High	4.25	H
FALSE	High	EATTDFTVDSRPLTQVGGDHIK		1	1	2	O75369	0	2387.18	High	4.25	E
FALSE	High	ETVYCLNDDDETEVLK	1xCarbamidomethyl [C5]	1	1	2	P13010	0	1942.86	High	4.25	E
FALSE	High	ILLQGTPVAQMTEDAVDAER		1	1	7	P01024	0	2157.09	High	4.25	I
FALSE	High	SPFSVAVSPSLDLSK		1	1	3	P21333	0	1533.82	High	4.25	S
FALSE	High	KMEDSVGCLETAEEVK	1xCarbamidomethyl [C8]	1	1	1	P35579	1	1824.84	High	4.25	K
FALSE	High	QTQVSVLPEGGETPLFK		1	1	3	P06396	0	1829.96	High	4.25	Q
FALSE	High	NLSFDSEEEELGELLQQFGELK		1	1	4	Q9NW13	0	2554.22	High	4.24	N
FALSE	High	HWPFQVINDGDKPK		1	1	2	P0DMV9	0	1680.85	High	4.24	H
FALSE	High	LSGSNPYTTVTPQIINSK		1	1	2	O43707	0	1920.01	High	4.24	L
FALSE	High	LVINGNPITIFQER		1	1	25	P04406	0	1613.9	High	4.24	L
FALSE	High	MAVTFIGNSTAIQELFK		1	1	11	P07437	0	1869.98	High	4.24	M
FALSE	High	IVSSSDVGHDEYSTQSLVK		1	1	1	Q01082	0	2050.99	High	4.24	I
FALSE	High	CFIEEIPDETMVIGNYR	1xCarbamidomethyl [C1]	1	2	2	Q9BVK6	0	2085.96	High	4.24	C
FALSE	High	HALIIYDDLSK		1	1	3	P25705	0	1287.69	High	4.24	H
FALSE	High	MMLGTEGGEGFVVK	1xAcetyl [N-Term]	1	1	3	P31943	0	1496.71	High	4.24	M
FALSE	High	EALKDEYDDLSDLTAAQQETLSDWESQFTFK		1	1	1	O00264	1	3623.65	High	4.24	E
FALSE	High	VELNALMTDETISNVPILILGNK		1	1	5	Q9NR31	0	2497.36	High	4.24	V
FALSE	High	VIISAPSADAPMFVMGVNHEK	1xOxidation [M]	1	1	8	P04406	0	2229.1	High	4.24	V
FALSE	High	LMTDTINEPILLCR	1xCarbamidomethyl [C13]	1	1	2	O43776	0	1688.87	High	4.24	L
FALSE	High	HLNEIDLFHCIDPNDSK	1xCarbamidomethyl [C10]	1	1	4	Q15185	0	2066.96	High	4.24	H
FALSE	High	MSASDPNSSIFLTDTAK		1	1	2	P23381	0	1784.84	High	4.23	M
FALSE	High	LLIHQSLAGGIIGVK		1	1	1	P61978	0	1518.94	High	4.23	L
FALSE	High	AANDAGYFNDEMAPIEVK		1	1	2	P42765	0	1954.89	High	4.23	A
FALSE	High	VCNFLASQVPFPSR	1xCarbamidomethyl [C2]	1	1	2	Q99714	0	1621.82	High	4.23	V
FALSE	High	IQHILCTGNLCTK	2xCarbamidomethyl [C6; C11]	1	1	1	Q9UBQ0	0	1557.79	High	4.23	I
FALSE	High	CGAALAGHQLIR	1xCarbamidomethyl [C1]	1	1	1	P78527	0	1266.67	High	4.23	C
FALSE	High	DSLDPSFTHAMQLLTAEIEK		1	1	9	Q07666	0	2246.1	High	4.22	D
FALSE	High	SQTIYEIIDNSQGFYVCPVEPQNR	1xCarbamidomethyl [C17]	1	1	2	Q9Y617	0	2857.35	High	4.22	S
FALSE	High	QLLQANPILEAFGNAK		1	3	1	P35579	0	1726.95	High	4.22	Q
FALSE	High	YSNSALGHVNCTIK	1xCarbamidomethyl [C11]	1	1	2	Q9NQC3	0	1563.76	High	4.22	Y
FALSE	High	LALSQNQQSSGAAGPTGK		1	1	1	O95232	0	1714.87	High	4.22	L
FALSE	High	TDIQIALPSGCYGR	1xCarbamidomethyl [C11]	1	1	2	P33316	0	1550.76	High	4.22	T
FALSE	High	LEQELFSGGNTGINFEK		1	2	1	O00571	0	1882.92	High	4.22	L
FALSE	High	HGGTIPIVPTAEFQDR		1	1	1	P00367	0	1737.89	High	4.22	H
FALSE	High	QDLPNAMAISEMTDK		1	1	2	P18085	0	1663.77	High	4.22	Q
FALSE	High	SSPSGPSNPSNPSVEEK		1	1	1	Q8WY22	0	1699.78	High	4.22	S
FALSE	High	KPLLESGTLGTK		1	1	2	P22314	0	1243.73	High	4.22	K
FALSE	High	GQYISPFHDIPIYADK		1	1	2	Q15181	0	1863.93	High	4.22	G
FALSE	High	DVSELTGFPEMLGGR		1	1	2	P31939	0	1607.77	High	4.22	D
FALSE	High	MEVVEAAAAQLETLK	1xAcetyl [N-Term]	1	1	3	Q96HR8	0	1644.85	High	4.22	M
FALSE	High	VSGAQEMVSSAK		1	1	2	O60664	0	1193.58	High	4.22	V
FALSE	High	LEEEDEDEEDGESGCTFLVGLIQK	1xCarbamidomethyl [C15]	1	1	1	P17655	0	2741.2	High	4.22	L
FALSE	High	TPGRPTSSQSYEQNIK		1	1	1	O60573	0	1792.88	High	4.22	T
FALSE	High	VNIVFNYDMPEDSDTYLHR		1	1	1	O00148	0	2328.06	High	4.21	V
FALSE	High	IVAPISDSPKPPPQR		1	1	1	O95336	0	1601.9	High	4.21	I
FALSE	High	AEYEGDGIPTVFVAVAGR		1	1	3	P22234	0	1850.93	High	4.21	A
FALSE	High	QGIETPEDQNDLRK		1	1	1	Q15637	1	1642.8	High	4.21	Q
FALSE	High	GHAGSVDSIAVDGSGTK		1	1	1	Q9GZL7	0	1557.75	High	4.21	G
FALSE	High	ITPAHDQNDYEVGQR		1	1	1	P26640	0	1742.81	High	4.21	I
FALSE	High	LPACVVDCGTGYTK	2xCarbamidomethyl [C4; C8]	1	1	1	P61158	0	1540.71	High	4.21	L
FALSE	High	EQNIVFNAETYSNLIK		1	1	2	P42704	0	1882.95	High	4.21	E
FALSE	High	YAPTEVGLHEMHIK		1	1	3	O75369	0	1624.82	High	4.21	Y
FALSE	High	NPILWNVADVVIK		1	1	1	P04844	0	1480.85	High	4.21	N
FALSE	High	SGDWVCPNPSCGNMNFAR	2xCarbamidomethyl [C6; C11]	1	1	2	Q92804	0	2068.84	High	4.21	S
FALSE	High	DFTVSAMHGDMDQK		1	1	5	P60842	0	1581.67	High	4.21	D
FALSE	High	ENAPAIIFIDEIDAIATK		1	1	7	P43686	0	1944.03	High	4.21	E
FALSE	High	ICGDIHGQYYDLLR	1xCarbamidomethyl [C2]	1	2	1	P62136	0	1722.83	High	4.21	I
FALSE	High	IQYQLVDISQDNALRDEMR		1	1	1	Q9H299	1	2307.14	High	4.2	I
FALSE	High	SAALPIFSSFVSNWDEATK		1	1	7	O76021	0	2070.02	High	4.2	S
FALSE	High	FQMPDQGMTSADDFFQGTK		1	1	1	Q16555	0	2150.92	High	4.2	F
FALSE	High	CCSGAIIVLTK	2xCarbamidomethyl [C1; C2]	1	1	4	P14618	0	1221.63	High	4.2	C
FALSE	High	TASEMVLADDNFSTIVAAVEEGR		1	2	1	P16615	0	2425.16	High	4.2	T
FALSE	High	ELDPTNMTYITNQAAVYFEK		1	1	4	P31948	0	2348.11	High	4.2	E
FALSE	High	ALDIAENEMPGLMR		1	1	2	P23526	0	1559.76	High	4.2	A
FALSE	High	IEGCIIGFDEYMNLVLDDAEEIHSK	1xCarbamidomethyl [C4]	1	1	4	P62304	0	2910.35	High	4.2	I
FALSE	High	CEYLMELMTPAACPEPPPEAPTEDDHDEL	2xCarbamidomethyl [C1; C13]	1	1	4	P14314	0	3357.39	High	4.2	C
FALSE	High	GYEVIYLTEPVDEYCIQALPEFDGK	1xCarbamidomethyl [C15]	1	1	4	P14625	0	2948.39	High	4.2	G
FALSE	High	LTQIQESQVTSHNK		1	1	1	Q92541	0	1612.83	High	4.2	L
FALSE	High	EDAAQFAAGMASALEALEGGGPPPPPALPTWSVPNGPSPEEVEQQK		1	1	2	P50552	0	4625.21	High	4.2	E
FALSE	High	AGDMENAENILTVMR		1	1	1	P42704	0	1663.78	High	4.2	A
FALSE	High	WNTDNTLGTEITVEDQLAR		1	1	1	P21796	0	2176.05	High	4.2	W
FALSE	High	GFVEPDHYVVVGAQR		1	1	3	P02786	0	1672.84	High	4.2	G
FALSE	High	DTVTISGPQAPVFEFVEQLR		1	1	3	P49327	0	2233.15	High	4.2	D
FALSE	High	EDVFVHQTAIK		2	3	4	P16989; P67809	0	1286.67	High	4.2	E
FALSE	High	ELAAEMAAAFLNENLPESIFGAPK		1	1	2	Q15393	0	2533.26	High	4.2	E
FALSE	High	TLYVEEVVPNVIEPSFGLGR		1	1	1	P41250	0	2218.18	High	4.19	T
FALSE	High	IQPGSQQADFLDALIVSMDVIQHETIGK		1	1	3	P13010	0	3053.56	High	4.19	I
FALSE	High	QFVTPADVVSGNPK		2	2	2	Q14651; P13797	0	1458.76	High	4.19	Q
FALSE	High	QGFGELLQAVPLADSFR		1	1	4	P27695	0	1847.97	High	4.19	Q
FALSE	High	DVLIQGLIDENPGLQLIIR		1	1	4	P78527	0	2119.21	High	4.19	D
FALSE	High	SSEMNVLIPTEGGDFNEFPVPEQFK		1	1	1	Q01518	0	2811.32	High	4.19	S
FALSE	High	QADTVYFLPITPQFVTEVIK		1	1	10	P31327	0	2309.24	High	4.19	Q
FALSE	High	TGEAIVDAALSALR		1	1	5	Q15084	0	1386.76	High	4.19	T
FALSE	High	ACALSIEESCRPGDK	2xCarbamidomethyl [C2; C10]	1	1	1	P31040	0	1692.77	High	4.19	A
FALSE	High	EEGETADTVGCCSLR	2xCarbamidomethyl [C11; C12]	1	1	1	P11387	0	1683.69	High	4.19	E
FALSE	High	EVIAVSCGPAQCQETIR	2xCarbamidomethyl [C7; C12]	1	1	2	P38117	0	1917.92	High	4.19	E
FALSE	High	VMLGETNPADSKPGTIR		2	3	5	P15531; P22392	0	1785.92	High	4.18	V
FALSE	High	MISAAQLLDELMGR	1xAcetyl [N-Term]	1	1	1	O95232	0	1589.8	High	4.18	M
FALSE	High	TIAECLADELINAAK	1xCarbamidomethyl [C5]	1	1	22	P46782	0	1631.83	High	4.18	T
FALSE	High	LYGSAGPPPTGEEDTAEKDEL		1	1	7	P11021	1	2175.99	High	4.18	L
FALSE	High	NYGILADATEQVGQHK		1	1	1	Q9BZZ5	0	1743.87	High	4.18	N
FALSE	High	NAAHALPTTLGALER		1	1	1	Q8NBJ5	0	1534.83	High	4.18	N
FALSE	High	GLVYETSVLDPDEGIR		1	1	3	O75390	0	1762.89	High	4.18	G
FALSE	High	TPELNLDQFHDK		1	1	5	P27824	0	1456.71	High	4.18	T
FALSE	High	GAVSAEQVIAGFNR		1	1	1	Q9UHV9	0	1418.74	High	4.18	G
FALSE	High	TVLSANADHMAQIEGLMDDVDFK		1	1	1	Q9Y4L1	0	2520.17	High	4.18	T
FALSE	High	RGDACEGDSGGPFVMK	1xCarbamidomethyl [C5]	1	1	2	P00734	1	1682.73	High	4.18	R
FALSE	High	DYLHLPPEIVPATLR		1	1	16	P46783	0	1733.96	High	4.18	D
FALSE	High	EVGNYAAVESEEFLAFPAYLLGINQDR		1	1	3	Q12965	0	3015.47	High	4.18	E
FALSE	High	HELLQPFNVLYEK		1	1	3	Q9UQ80	0	1629.86	High	4.18	H
FALSE	High	EDTESLEIFQNEVAR		1	1	1	Q9BS26	0	1779.84	High	4.18	E
FALSE	High	HVGNQQYNVTYVVK		1	1	3	O75369	0	1648.84	High	4.17	H
FALSE	High	EDDPGEAASMSMFSDFLQSFLK		1	1	1	P57740	0	2452.07	High	4.17	E
FALSE	High	ISGGSVVEMQGDEMTR		1	1	1	O75874	0	1695.77	High	4.17	I
FALSE	High	HETLTSLNLEK		1	1	1	Q96A26	0	1284.68	High	4.17	H
FALSE	High	LFIGGLNVQTSESGLR		1	1	1	Q13151	0	1690.91	High	4.17	L
FALSE	High	NSLESYAFNMK		1	1	3	P11142	0	1303.6	High	4.17	N
FALSE	High	GIEILTDMSRPVELSDR		1	1	2	P50991	0	1930.99	High	4.17	G
FALSE	High	IMEGPAFNFLDAPAVR		1	1	2	P11177	0	1747.88	High	4.17	I
FALSE	High	LIEGLSHEVIVSAACGR	1xCarbamidomethyl [C15]	1	1	1	Q9P258	0	1810.95	High	4.17	L
FALSE	High	SVTEQGAELSNEER		1	1	4	P63104	0	1548.71	High	4.17	S
FALSE	High	DTSEDIEELVEPVAAHGPK		1	1	1	Q99460	0	2035.98	High	4.17	D
FALSE	High	VGAHAGEYGAEALER		1	1	5	P69905	0	1529.73	High	4.17	V
FALSE	High	ALEHFTDLYDIK		1	1	3	Q00610	0	1464.74	High	4.17	A
FALSE	High	TANEGGSLLYEQLGYK		1	1	2	Q96QD8	0	1742.86	High	4.17	T
FALSE	High	SSGSPYGGGYGSGGGSGGYGSR		1	1	1	P51991	0	1910.79	High	4.17	S
FALSE	High	IIDLEEAEDEIEDIQQEITVLSQCDSPYVTK	1xCarbamidomethyl [C24]	1	1	2	Q9Y6E0	0	3622.72	High	4.16	I
FALSE	High	TLSSSTQASLEIDSLFEGIDFYTSITR		1	1	5	P0DMV9	0	2981.46	High	4.16	T
FALSE	High	DLEAEHVEVEDTTLNR		1	1	1	Q9H3K6	0	1869.88	High	4.16	D
FALSE	High	VDSDDQWGEYSCVFLPEPMGTANIQLHGPPR	1xCarbamidomethyl [C12]	1	1	2	P35613	0	3515.6	High	4.16	V
FALSE	High	SVMDATQIAGLNCLR	1xCarbamidomethyl [C13]	1	1	1	P34932	0	1648.81	High	4.16	S
FALSE	High	STFFNVLTNSQASAENFPFCTIDPNESR	1xCarbamidomethyl [C20]	1	1	2	Q9NTK5	0	3193.45	High	4.16	S
FALSE	High	AMFESQSEDELTPFDMSIQCIQSVYISK	1xCarbamidomethyl [C20]	1	1	1	P12956	0	3283.48	High	4.16	A
FALSE	High	SLGNVIDPLDVIYGISLQGLHNQLLNSNLDPSEVEK		1	1	2	P26640	0	3904.03	High	4.16	S
FALSE	High	GEMMDLQHGSLFLR		1	1	6	P00338	0	1633.78	High	4.16	G
FALSE	High	MDGTYACSYTPVK	1xCarbamidomethyl [C7]	1	1	1	O75369	0	1492.64	High	4.16	M
FALSE	High	VDTMIVQAISLLDDLDK		1	1	9	Q9Y2X3	0	1888.99	High	4.16	V
FALSE	High	QGLNGVPILSEEELSLLDEFYK		1	1	1	Q14444	0	2493.28	High	4.16	Q
FALSE	High	DPYTGQSVSLFQALK		1	1	1	Q15149	0	1653.85	High	4.16	D
FALSE	High	MSATFIGNSTAIQELFK		1	3	13	P68371	0	1857.94	High	4.15	M
FALSE	High	QPMNAASGAAMSLAGAEK		1	1	1	P08195	0	1704.8	High	4.15	Q
FALSE	High	GNFTLPEVAECFDEITYVELQK	1xCarbamidomethyl [C11]	1	1	14	Q00839	0	2602.24	High	4.15	G
FALSE	High	VLGTSVESIMATEDR		1	1	5	P31327	0	1607.79	High	4.15	V
FALSE	High	SQETECTYFSTPLLLGK	1xCarbamidomethyl [C6]	1	1	3	P40926	0	1973.95	High	4.15	S
FALSE	High	TQEQLALEMAELTAR		1	1	3	P26038	0	1703.86	High	4.15	T
FALSE	High	AVEVQGPSLESGDHGK		1	1	1	Q09666	0	1609.78	High	4.15	A
FALSE	High	EEILANGGSLSHHHGVGK		1	1	1	O00116	0	1841.93	High	4.15	E
FALSE	High	QSLGHPPPEPGPDR		1	1	1	P13861	0	1483.73	High	4.15	Q
FALSE	High	TRLEQEIATYR		1	6	5	Q04695	1	1379.73	High	4.15	T
FALSE	High	MSGGWELELNGTEAK		1	1	2	Q07021	0	1621.75	High	4.15	M
FALSE	High	FSVCVLGDQQHCDEAK	2xCarbamidomethyl [C4; C12]	1	1	4	P62906	0	1892.83	High	4.15	F
FALSE	High	HQGVMVGMGQK		2	7	1	P60709; P68133	0	1171.57	High	4.15	H
FALSE	High	YNEQHVPGSPFTAR		1	1	3	P21333	0	1602.77	High	4.15	Y
FALSE	High	VVSIGVPVSELLDDPSGPAGSLTSVEFCGGTHLR	1xCarbamidomethyl [C28]	1	1	2	P49588	0	3452.74	High	4.15	V
FALSE	High	DAGEGGLSLAIEGPSK		1	1	2	P21333	0	1500.75	High	4.15	D
FALSE	High	TSAADLVTETDHLVEDLIISELR		1	1	4	O14732	0	2540.31	High	4.14	T
FALSE	High	IYEGQVEVTGDEYNVESIDGQPGAFTCYLDAGLAR	1xCarbamidomethyl [C27]	1	1	1	P46777	0	3836.76	High	4.14	I
FALSE	High	NVIIWGNHSSTQYPDVNHAK		1	1	1	P40925	0	2280.12	High	4.14	N
FALSE	High	ILSISADIETIGEILK		1	1	13	P61978	0	1714.98	High	4.14	I
FALSE	High	EAYMGNVLQGGEGQAPTR		1	1	1	P24752	0	1877.88	High	4.14	E
FALSE	High	NFILDQTNVSAAAQR		1	1	5	Q00839	0	1647.84	High	4.14	N
FALSE	High	DAYSGGAVNLYHVR		1	1	3	P28074	0	1521.74	High	4.14	D
FALSE	High	EGQEIASVSDDHTCR	1xCarbamidomethyl [C14]	1	1	1	Q8NFH4	0	1703.73	High	4.14	E
FALSE	High	VFLLGEEVAQYDGAYK		1	1	1	P11177	0	1801.9	High	4.14	V
FALSE	High	NLGSINTELQDVQR		1	1	1	O75396	0	1586.81	High	4.14	N
FALSE	High	AATAPLLEAVDNLSAFASNPEFSSIPAQISPEGR		1	1	2	Q9Y490	0	3470.74	High	4.14	A
FALSE	High	NPPGFAFVEFEDPRDAEDAVR		1	1	2	Q16629	1	2378.1	High	4.14	N
FALSE	High	RISGLIYEETR		1	1	8	P62805	1	1336.72	High	4.14	R
FALSE	High	TGAIVDVPVGEELLGR		1	1	4	P25705	0	1624.89	High	4.13	T
FALSE	High	GDVEEDETIPDSEQDIRPR		1	1	1	Q92973	0	2200	High	4.13	G
FALSE	High	EGEEAGPGDPLLEAVPK		1	1	2	Q16543	0	1707.84	High	4.13	E
FALSE	High	DTHDQLSEPSEVR		1	1	1	Q15149	0	1512.69	High	4.13	D
FALSE	High	FPVEMTHNHNFR		1	1	1	P05546	0	1528.71	High	4.13	F
FALSE	High	AGGAAVVITEPEHTK		1	1	3	Q9P258	0	1479.78	High	4.13	A
FALSE	High	STNLLAAETASLEEQLQGWGEVMLMADK		1	1	4	Q15041	0	3035.47	High	4.13	S
FALSE	High	MAATFIGNSTAIQELFK	1xOxidation [M1]	0	1	13		0	1857.94	High	4.13	M
FALSE	High	VEDAADSATKPENLSSK		1	1	1	P46013	0	1761.85	High	4.13	V
FALSE	High	SLDLFNCEITNLEDYR	1xCarbamidomethyl [C7]	1	1	2	Q9BTT0	0	2001.92	High	4.13	S
FALSE	High	KYEEIDNAPEER		1	1	2	P49411	1	1492.69	High	4.13	K
FALSE	High	QAFDDAIAELDTLNEDSYK		1	1	1	Q04917	0	2157.98	High	4.13	Q
FALSE	High	LAAAVSNFGYDLYR		1	1	2	P36955	0	1559.79	High	4.13	L
FALSE	High	ARPFPDGLAEDIDK		1	1	9	P13639	0	1543.78	High	4.13	A
FALSE	High	NPYYGGESASITPLEDLYK		1	1	3	P50395	0	2117.01	High	4.13	N
FALSE	High	TPFGAYGGLLK		1	1	1	P42765	0	1123.61	High	4.13	T
FALSE	High	LSDFNDITNMLLLK		1	1	1	P78527	0	1636.86	High	4.13	L
FALSE	High	TLWTVLDAIDQMWLPVVR		1	2	1	P18669	0	2156.16	High	4.13	T
FALSE	High	FLESVEGNQNYPLLLLTLLEK		1	1	3	P55060	0	2433.33	High	4.13	F
FALSE	High	EALAQCVLAEIPQQVVGYFNTYK	1xCarbamidomethyl [C6]	1	1	1	O75131	0	2641.33	High	4.13	E
FALSE	High	QYTSPEEIDAQLQAEK		1	1	2	Q13442	0	1849.88	High	4.12	Q
FALSE	High	GDLLIDIGSGPTIYQLLSACESFK	1xCarbamidomethyl [C20]	1	1	2	P40261	0	2597.32	High	4.12	G
FALSE	High	VEQIAAIAQELNELDYYDSPSVNAR		1	1	1	P12814	0	2808.37	High	4.12	V
FALSE	High	FQSVPAQPGQTSPLLQYFGILLDQGQLNK		1	1	2	Q00610	0	3187.68	High	4.12	F
FALSE	High	LHIIEVGTPPTGNQPFPK		1	1	1	Q00610	0	1945.05	High	4.12	L
FALSE	High	SDPGLLTNTMDVFVK		1	1	2	P78527	0	1636.83	High	4.12	S
FALSE	High	LPDNVTFEEGALIEPLSVGIHACR	1xCarbamidomethyl [C23]	1	1	1	Q00796	0	2637.33	High	4.12	L
FALSE	High	TASNVEEAFINTAK		1	1	1	P61019	0	1494.74	High	4.12	T
FALSE	High	DVQDSLTVSNEAQTAK		1	1	1	P52907	0	1705.82	High	4.12	D
FALSE	High	NPEQVDLYQFMAK		1	1	1	P56192	0	1582.76	High	4.12	N
FALSE	High	GILFVGSGVSGGEEGAR		1	1	2	P52209	0	1591.81	High	4.12	G
FALSE	High	VESVFETLVEDSAEEESTLTK		1	1	2	Q9Y4L1	0	2342.11	High	4.12	V
FALSE	High	ENVNATENCISAVGK	1xCarbamidomethyl [C9]	1	1	1	O00410	0	1605.75	High	4.12	E
FALSE	High	VGEATETALTCLVEK	1xCarbamidomethyl [C11]	1	2	1	P16615	0	1620.81	High	4.12	V
FALSE	High	ISSDLDGHPVPK		1	1	6	P29401	0	1264.65	High	4.12	I
FALSE	High	EALPAPSDDATALMTDPK		1	1	2	P07203	0	1842.88	High	4.12	E
FALSE	High	YTVQDESHSEWVSCVR	1xCarbamidomethyl [C14]	1	1	3	P63244	0	1981.87	High	4.12	Y
FALSE	High	LATQLTGPVMPVR		1	1	2	P26373	0	1382.78	High	4.12	L
FALSE	High	QCENDIIPNVLEAMISGELDILK	1xCarbamidomethyl [C2]	1	1	1	O43615	0	2614.31	High	4.11	Q
FALSE	High	SEDPDQQYLILNTAR		1	1	1	Q96QK1	0	1762.86	High	4.11	S
FALSE	High	GLGTDEESILTLLTSR		1	1	4	P08758	0	1704.9	High	4.11	G
FALSE	High	FNVGEDCPVFDGLFEFCQLSTGGSVAGAVK	2xCarbamidomethyl [C7; C17]	1	1	2	Q92769	0	3207.48	High	4.11	F
FALSE	High	GFIGPGIDVPAPDMSTGER		1	1	2	P00367	0	1915.92	High	4.11	G
FALSE	High	QLFHPEQLITGK		3	8	14	Q71U36; Q9BQE3; P68366	0	1410.77	High	4.11	Q
FALSE	High	EAAGEGPALYEDPPDQK		1	1	2	P27695	0	1786.81	High	4.11	E
FALSE	High	GVDNTFADELVELSTALEHQEYITFLEDLK		1	1	3	Q07021	0	3439.68	High	4.11	G
FALSE	High	NEGNIFPNPEATFVK		1	1	2	Q9Y5B9	0	1676.83	High	4.11	N
FALSE	High	DAFQNAYLELGGLGER		1	1	1	P05023	0	1752.86	High	4.11	D
FALSE	High	IISNASCTTNCLAPLAK	2xCarbamidomethyl [C7; C11]	1	1	7	P04406	0	1833.92	High	4.11	I
FALSE	High	APNTPDILEIEFK		1	1	4	P00966	0	1486.78	High	4.11	A
FALSE	High	CESAPGCGVWQRPVIDNPNYK	2xCarbamidomethyl [C1; C7]	1	1	2	P27824	0	2447.12	High	4.11	C
FALSE	High	LSALGNVTTCNDYVALVHPDLDRETEEILADVLK	1xCarbamidomethyl [C10]	1	1	4	P56537	1	3783.91	High	4.11	L
FALSE	High	VYATILNAGTNTDGFK		1	1	1	P49327	0	1684.85	High	4.11	V
FALSE	High	LGTLSALDILIK		1	1	1	Q86VP6	0	1256.78	High	4.1	L
FALSE	High	DVWGIEGPIDAAFTR		1	1	4	P04004	0	1646.82	High	4.1	D
FALSE	High	GTDSQAMEEEKPEGHV		1	1	1	Q13451	0	1743.75	High	4.1	G
FALSE	High	TVLELMNPEAQLPQVYPFAADLYQK		1	1	2	P46940	0	2878.47	High	4.1	T
FALSE	High	YEEYDNAIITMMNHPTDAWK		1	1	2	Q00610	0	2442.07	High	4.1	Y
FALSE	High	HRPELIDYGK		1	1	1	P12814	0	1227.65	High	4.1	H
FALSE	High	ASLNPSDTPPSVVNEDFLHDLK		1	1	2	O00116	0	2395.18	High	4.1	A
FALSE	High	NSNPALNDNLEK		1	1	2	O00299	0	1328.64	High	4.1	N
FALSE	High	SSQSSSQQFSGIGR		1	1	1	Q92841	0	1455.68	High	4.1	S
FALSE	High	EILGTAQSVGCNVDGR	1xCarbamidomethyl [C11]	1	1	5	P30050	0	1675.81	High	4.1	E
FALSE	High	TEGLSVLSQAMAVIK		1	1	1	P05198	0	1546.85	High	4.1	T
FALSE	High	ISNRPAFMPSEGK		1	2	4	O43707	0	1433.72	High	4.1	I
FALSE	High	ILNNSGLPITSAIDLEDAAK		1	1	1	Q96I99	0	2055.1	High	4.1	I
FALSE	High	EPALNEANLSNLK		1	1	2	Q06323	0	1412.74	High	4.1	E
FALSE	High	GDVVNQDDLYQALASGK		1	1	1	Q9UBQ7	0	1792.87	High	4.09	G
FALSE	High	AHQVVEDGYEFFAK		2	3	1	P62136; P62140	0	1639.78	High	4.09	A
FALSE	High	VPASQPRPESKPESQIPPQRPQR		1	1	2	Q13283	0	2609.39	High	4.09	V
FALSE	High	MLDAEDIVNTARPDEK		1	1	2	O43707	0	1816.87	High	4.09	M
FALSE	High	GYTSWAIGLSVADLAESIMK		1	1	3	P00338	0	2112.07	High	4.09	G
FALSE	High	AILVDLEPGTMDSVR		1	4	8	P07437	0	1615.84	High	4.09	A
FALSE	High	DFLDGVYAFEYYPSTPGR		1	1	1	O75369	0	2096.96	High	4.09	D
FALSE	High	NAGNCLSPAVIVGLLK	1xCarbamidomethyl [C5]	1	1	9	O43175	0	1625.9	High	4.09	N
FALSE	High	YDQATDTILTVTENIFSSMGDAGEMVR		1	1	4	Q9Y490	0	2964.36	High	4.09	Y
FALSE	High	GFSEGLWEIENNPTVK		1	1	4	P51858	0	1819.89	High	4.09	G
FALSE	High	ICDQWDNLGALTQK	1xCarbamidomethyl [C2]	1	1	2	P12814	0	1661.8	High	4.09	I
FALSE	High	LDNLVAILDINR		1	1	3	P29401	0	1368.78	High	4.09	L
FALSE	High	GDTLLQALDLLPLLIQTVEK		1	1	1	Q92616	0	2193.27	High	4.08	G
FALSE	High	TPVEPEVAIHR		1	1	5	P60866	0	1247.67	High	4.08	T
FALSE	High	ESTQLSPADLTEGKPTDPSK		1	1	1	Q08J23	0	2101.03	High	4.08	E
FALSE	High	VMTIPYQPMPASSPVICAGGQDR	1xCarbamidomethyl [C17]	1	1	1	Q15365	0	2475.18	High	4.08	V
FALSE	High	YESLELCRPVLQQGR	1xCarbamidomethyl [C7]	1	1	1	Q00610	0	1847.94	High	4.08	Y
FALSE	High	CVLLSNLSSTSHVPEVDPGSAELQK	1xCarbamidomethyl [C1]	1	1	1	P49327	0	2667.33	High	4.08	C
FALSE	High	IEGDMIVCAAYAHELPK	1xCarbamidomethyl [C8]	1	1	2	P46777	0	1916.92	High	4.08	I
FALSE	High	HILGFDTGDAVLNEAAQILR		1	1	2	Q9Y224	0	2153.13	High	4.08	H
FALSE	High	EELIAELQDCEGLIVR	1xCarbamidomethyl [C10]	1	1	2	O43175	0	1886.95	High	4.08	E
FALSE	High	DYDALFPVAEDISLLQQASSVLDETR		1	1	1	Q9H1I8	0	2895.43	High	4.08	D
FALSE	High	EFHLNESGDPSSK		1	2	5	Q01105	0	1446.65	High	4.08	E
FALSE	High	AFYPEEISSMVLTK		1	2	6	P0DMV9	0	1614.81	High	4.08	A
FALSE	High	TTPDPSANISLDGVDVPLGTGISSGVNDTSLLYNEYIVYDIAQVNLK		1	1	3	P09874	0	4938.48	High	4.08	T
FALSE	High	AMDSDWFAENYMGR		1	1	1	P55084	0	1692.68	High	4.08	A
FALSE	High	IPYLPITNFNQNWQDGK		1	1	3	O75369	0	2048.02	High	4.08	I
FALSE	High	IEELDQENEAALENGIK		1	1	1	P43243	0	1914.93	High	4.08	I
FALSE	High	NVFDEAILAALEPPEPK		1	1	8	P60953	0	1852.97	High	4.08	N
FALSE	High	DVPWGVDSLITLAFQDQR		1	1	7	Q16658	0	2060.04	High	4.08	D
FALSE	High	LAELNSYVPVTAYTGPLVEDFLSGFQVVVLTNTPLEDQLR		1	1	1	P22314	0	4408.3	High	4.08	L
FALSE	High	WVTTASLLDYDTVAGADK		1	1	1	Q15393	0	1925.95	High	4.08	W
FALSE	High	LELSDNIISGGLEVLAEK		1	1	2	Q9BTT0	0	1900.03	High	4.08	L
FALSE	High	VDINAPDVDVQGPDWHLK		1	1	1	Q09666	0	2018	High	4.07	V
FALSE	High	GLAITFVSDENDAK		2	2	2	O00148; Q13838	0	1479.73	High	4.07	G
FALSE	High	ILDIDNVDLAMGK		1	1	1	O43615	0	1416.74	High	4.07	I
FALSE	High	VTDETSGCSLTCAQFHPDGLIFGTGTMDSQIK	2xCarbamidomethyl [C8; C12]	1	1	2	Q9UMS4	0	3473.57	High	4.07	V
FALSE	High	GVVDSEDLPLNISR		3	3	14	P07900; P08238; Q12931	0	1513.79	High	4.07	G
FALSE	High	KEELVAEQALK		1	2	4	Q7L1Q6	1	1257.7	High	4.07	K
FALSE	High	LEQPDPGAVAAAAILR		1	1	1	Q3LXA3	0	1591.88	High	4.07	L
FALSE	High	DDPVTNLNNAFEVAEK		1	1	3	O43707	0	1775.84	High	4.07	D
FALSE	High	EQGYDVIAYLANIGQK		1	1	2	P00966	0	1781.91	High	4.07	E
FALSE	High	FDTLCDLYDTLTITQAVIFCNTK	2xCarbamidomethyl [C5; C20]	1	1	4	P38919	0	2752.32	High	4.07	F
FALSE	High	ALVLELCCNDESGEDVEVPYVR	2xCarbamidomethyl [C7; C8]	1	1	1	P22314	0	2566.18	High	4.07	A
FALSE	High	TFEEAAAQLLESSVQNLFK		1	1	5	Q9UKN8	0	2125.08	High	4.07	T
FALSE	High	LPIGDVATQYFADR		1	1	2	Q99832	0	1565.8	High	4.07	L
FALSE	High	ASLEAAIADAEQR		1	1	7	P05787	0	1344.68	High	4.07	A
FALSE	High	WGLGGTCVNVGCIPK	2xCarbamidomethyl [C7; C12]	2	2	1	Q16881; Q9NNW7	0	1617.79	High	4.07	W
FALSE	High	YNVYPTYDFACPIVDSIEGVTHALR	1xCarbamidomethyl [C11]	1	1	4	P07814	0	2900.39	High	4.07	Y
FALSE	High	DGDSVMVLPTIPEEEAK		1	1	5	P30041	0	1829.88	High	4.07	D
FALSE	High	ATIAGGGVIPHIHK		1	2	3	Q71UI9	0	1370.79	High	4.06	A
FALSE	High	THQPSDEVGTSIEHPR		1	1	1	Q99575	0	1789.85	High	4.06	T
FALSE	High	ISIPVDISDSDMMLNIINSSITTK		1	1	8	P49368	0	2607.33	High	4.06	I
FALSE	High	TATPQQAQEVHEKLR		1	1	1	P60174	1	1735.91	High	4.06	T
FALSE	High	RTEMENEFVLIK		1	1	4	P05787	1	1508.78	High	4.06	R
FALSE	High	IKDPDASKPEDWDER		1	1	5	P27797	1	1800.84	High	4.06	I
FALSE	High	APLNVQFNSPLPGDAVK		1	1	3	O75369	0	1766.94	High	4.06	A
FALSE	High	CGETGHVAINCSK	2xCarbamidomethyl [C1; C11]	1	1	2	P62633	0	1432.63	High	4.06	C
FALSE	High	SEHPGLSIGDTAK		1	1	3	P26583	0	1311.65	High	4.06	S
FALSE	High	VEAVNMAEGIIHDTETK		1	1	2	P38646	0	1856.91	High	4.06	V
FALSE	High	TAVVVGTITDDVR		1	1	3	Q07020	0	1345.73	High	4.06	T
FALSE	High	ELEALIQNLDNVVEDSMLVDPK		1	1	3	Q00341	0	2484.25	High	4.06	E
FALSE	High	EASMVITESPAALQLR		1	1	1	P27105	0	1715.9	High	4.05	E
FALSE	High	NQVAMNPTNTVFDAK		1	1	4	P11142	0	1649.8	High	4.05	N
FALSE	High	VGTDLLEEEITK		1	1	2	P29692	0	1346.7	High	4.05	V
FALSE	High	HRPELIEYDK		1	1	2	O43707	0	1299.67	High	4.05	H
FALSE	High	NVDMLSELVQEYDEPILK		1	1	1	Q99733	0	2135.06	High	4.05	N
FALSE	High	GAEVHLVPWNHDFTK		1	1	1	P31327	0	1749.87	High	4.05	G
FALSE	High	ISMQDVDLSLGSPK		1	1	1	Q09666	0	1489.76	High	4.05	I
FALSE	High	DVPFGFQTVTSDVNK		1	1	4	P36952	0	1653.81	High	4.05	D
FALSE	High	SSGPTSLFAVTVAPPGAR		1	1	6	Q00839	0	1714.91	High	4.05	S
FALSE	High	TPMENIGLQDSLLSR		1	1	1	P25205	0	1673.85	High	4.05	T
FALSE	High	LASALAPSIYEHEDIK		1	1	1	P33991	0	1756.91	High	4.05	L
FALSE	High	VLQLTSWDEDAWASK		1	1	2	P18206	0	1748.85	High	4.05	V
FALSE	High	ATSFLLALEPELEAR		1	1	2	P04843	0	1659.9	High	4.05	A
FALSE	High	AQQEQELAADAFK		1	1	3	P14314	0	1448.7	High	4.04	A
FALSE	High	VSLDPELEEALTSASDTELCDLAAILGMHNLITNTK	1xCarbamidomethyl [C20]	1	1	2	Q9NYL9	0	3884.91	High	4.04	V
FALSE	High	FGDPECQVILPLLK	1xCarbamidomethyl [C6]	1	1	3	P22102	0	1628.87	High	4.04	F
FALSE	High	GLGLVYELGNEQDQQELVSTLVETLMTGK		1	1	2	Q5VYK3	0	3164.6	High	4.04	G
FALSE	High	DQSAVVVQGLPEGVAFK		1	1	1	P78347	0	1743.93	High	4.04	D
FALSE	High	IYADTFGDINYQEFAK		1	1	1	Q15029	0	1894.89	High	4.04	I
FALSE	High	GNPTVEVDLFTSK		1	1	7	P06733	0	1406.72	High	4.04	G
FALSE	High	NQLDQEVEFLSTSIAQLK		1	1	4	Q99471	0	2063.07	High	4.04	N
FALSE	High	EMNPALGIDCLHK	1xCarbamidomethyl [C10]	1	1	3	P48643	0	1497.72	High	4.04	E
FALSE	High	GPLLVQDVVFTDEMAHFDR		1	1	1	P04040	0	2189.07	High	4.04	G
FALSE	High	FHMVDGNVSGEFTDLVPEK		1	1	1	O95433	0	2121	High	4.04	F
FALSE	High	FDPETNSDDACTYHPGVPVFHDALK	1xCarbamidomethyl [C11]	1	1	1	Q9UHD1	0	2832.26	High	4.04	F
FALSE	High	LAAQSCALSLVR	1xCarbamidomethyl [C6]	1	1	2	Q08211	0	1288.7	High	4.04	L
FALSE	High	LHKPPADSGVDLR		1	1	2	O15427	0	1404.76	High	4.04	L
FALSE	High	NINDAWVCTNDMFR	1xCarbamidomethyl [C8]	1	1	1	P61970	0	1755.76	High	4.04	N
FALSE	High	YYTEFPTVLDITAEDPSK		1	1	2	O14929	0	2089	High	4.04	Y
FALSE	High	VDNMIIQSISLLDQLDK		1	1	4	O00567	0	1945.03	High	4.04	V
FALSE	High	VDFPQDQLTALTGR		1	1	4	P40926	0	1560.8	High	4.04	V
FALSE	High	ILLANFLAQTEALMR		1	1	6	P06744	0	1703.95	High	4.04	I
FALSE	High	RNQSFCPTVNLDK	1xCarbamidomethyl [C6]	1	1	1	P46776	1	1578.77	High	4.03	R
FALSE	High	MAEDEAETIGNLIEECGGLEK	1xCarbamidomethyl [C16]	1	1	1	O00629	0	2308.03	High	4.03	M
FALSE	High	VEQLGAEGNVEESQK		1	1	1	Q9Y383	0	1616.78	High	4.03	V
FALSE	High	IDVCPENAEVTLTDFR	1xCarbamidomethyl [C4]	1	2	1	P35443	0	1878.89	High	4.03	I
FALSE	High	TVSLLDENNVSSYLSK		1	1	2	P78527	0	1768.9	High	4.03	T
FALSE	High	LGEVVNTHGPVEPDK		1	1	1	P30419	0	1590.81	High	4.03	L
FALSE	High	APSVANVGSHCDLSLK	1xCarbamidomethyl [C11]	1	1	1	P21333	0	1654.82	High	4.03	A
FALSE	High	YKPAVNQIECHPYLTQEK	1xCarbamidomethyl [C10]	1	1	1	P15121	0	2218.1	High	4.03	Y
FALSE	High	TVESEAASYLDQISR		1	1	2	P61289	0	1668.81	High	4.03	T
FALSE	High	LFLNETQTQEITEDIPVK		1	1	1	P41252	0	2118.1	High	4.03	L
FALSE	High	LLMSEDYFTQAMEVK		1	1	1	P42704	0	1804.85	High	4.03	L
FALSE	High	REAPVDVLTQIGR		1	1	1	Q9BVC6	1	1453.81	High	4.03	R
FALSE	High	MQEHSDQVPVGNIPR		1	1	1	P33993	0	1706.83	High	4.03	M
FALSE	High	LAQGHTTVDELAR		1	1	3	Q15149	0	1410.73	High	4.03	L
FALSE	High	GLLGLPEEETELDNLTEFNTAHNK		1	1	1	Q12972	0	2684.3	High	4.03	G
FALSE	High	DNNPVVVLENELMYGVPFEFPPEAQSK		1	1	4	P11177	0	3062.48	High	4.03	D
FALSE	High	SIQEIQELDKDDESLRK		1	1	1	P52565	2	2046.03	High	4.03	S
FALSE	High	EEIFGPVMSILSFDTEAEVLER		1	1	2	P49189	0	2511.23	High	4.03	E
FALSE	High	AQTAHIVLEDGTK		1	1	4	P31327	0	1382.73	High	4.03	A
FALSE	High	AFMTADLPNELIELLEK		1	2	9	Q00610	0	1947.01	High	4.02	A
FALSE	High	EHDPVGQMVNNPK		1	1	3	P55060	0	1464.69	High	4.02	E
FALSE	High	TFNTSTGGLLLPSDTK		1	1	3	P12956	0	1651.85	High	4.02	T
FALSE	High	QNLFQEAEEFLYR		1	1	3	Q9UL46	0	1686.81	High	4.02	Q
FALSE	High	ITDSAGHILYSK		1	1	2	P49755	0	1304.68	High	4.02	I
FALSE	High	LTPGCEAEAETEAICFFVQQFTDMEHNR	2xCarbamidomethyl [C5; C15]	1	1	3	P49327	0	3330.45	High	4.02	L
FALSE	High	SVPTSTVFYPSDGVATEK		1	1	7	P29401	0	1884.92	High	4.02	S
FALSE	High	SPFEVQVGPEAGMQK		1	1	2	O75369	0	1603.78	High	4.02	S
FALSE	High	NTVLCNVVEQFLQADLAR	1xCarbamidomethyl [C5]	1	1	2	Q14258	0	2090.07	High	4.02	N
FALSE	High	HNPTVTGHQEQTYLQK		1	1	2	Q71RC2	0	1880.92	High	4.02	H
FALSE	High	SPDTNYLFMGDYVDR		1	2	1	P67775	0	1792.78	High	4.02	S
FALSE	High	DPSASPGDAGEQAIR		1	1	2	P18206	0	1470.68	High	4.02	D
FALSE	High	IESDVQEPTEPEDDLDIMLGNK		1	1	1	P20042	0	2487.14	High	4.02	I
FALSE	High	HYEVEILDAK		1	1	2	Q9NZ01	0	1216.62	High	4.02	H
FALSE	High	VPQVSTPTLVEVSR		1	1	5	P02768	0	1511.84	High	4.02	V
FALSE	High	QELIQAEIQNGVK		1	1	1	Q12904	0	1469.8	High	4.02	Q
FALSE	High	YLEVVLNTLQQASQAQVDK		1	1	2	Q14974	0	2147.13	High	4.02	Y
FALSE	High	DDGVSIPGEYTSFLAPISSSK		1	1	2	O14744	0	2170.06	High	4.02	D
FALSE	High	FYPEDVAEELIQDITQK		1	1	11	P15311	0	2038	High	4.01	F
FALSE	High	VVSEDFLQDVSASTK		1	1	1	P09874	0	1624.81	High	4.01	V
FALSE	High	IFHTVTTTDDPVIR		1	1	1	O15371	0	1614.85	High	4.01	I
FALSE	High	AGTGVDNVDLEAATR		1	1	3	O43175	0	1488.73	High	4.01	A
FALSE	High	DDANNDPQWSEEQLIAAK		1	1	2	P22234	0	2043.93	High	4.01	D
FALSE	High	TTPYQIACGISQGLADNTVIAK	1xCarbamidomethyl [C8]	1	1	4	P26639	0	2321.18	High	4.01	T
FALSE	High	ETADTDTADQVMASFK		1	1	2	P12814	0	1729.76	High	4.01	E
FALSE	High	LVNHFVEEFK		1	1	4	P0DMV9	0	1261.66	High	4.01	L
FALSE	High	MFTAGIDLMDMASDILQPK		1	1	6	Q13011	0	2097.01	High	4.01	M
FALSE	High	MTLVASEDYGDTLAAIQGLLK		1	1	1	Q13813	0	2209.14	High	4.01	M
FALSE	High	GVGIISEGNETVEDIAAR		1	3	1	P05023	0	1829.92	High	4.01	G
FALSE	High	QPAIMPGQSYGLEDGSCSYK	1xCarbamidomethyl [C17]	1	1	1	P14866	0	2187.97	High	4.01	Q
FALSE	High	GFVPSPTSQPGGHESLVDR		1	1	1	P26640	0	1966.96	High	4.01	G
FALSE	High	ELFVQSEIFPLETPAFAIK		1	1	4	P49915	0	2179.17	High	4.01	E
FALSE	High	YLPPATQVVLISATLPHEILEMTNK		1	1	6	P38919	0	2778.51	High	4.01	Y
FALSE	High	VDATEESDLAQQYGVR		1	1	2	P07237	0	1780.83	High	4.01	V
FALSE	High	FLDGNELTLADCNLLPK	1xCarbamidomethyl [C12]	1	1	9	O00299	0	1932.97	High	4.01	F
FALSE	High	SLADELALVDVLEDK		1	1	12	P07195	0	1629.86	High	4.01	S
FALSE	High	TSLALDESLFR		1	1	1	Q86U42	0	1251.66	High	4	T
FALSE	High	VNQAIWLLCTGAR	1xCarbamidomethyl [C9]	1	1	1	P46782	0	1501.79	High	4	V
FALSE	High	DEFPEVYVPTVFENYVADIEVDGK		1	1	4	P62745	0	2774.31	High	4	D
FALSE	High	LAVEALSSLDGDLAGR		1	1	2	P12277	0	1586.84	High	4	L
FALSE	High	TFTTQETITNAETAK		1	1	3	P06744	0	1655.81	High	4	T
FALSE	High	YVQLPADEVDTQLLQDAAR		1	1	1	Q9Y333	0	2145.08	High	4	Y
FALSE	High	DVACGANHTLVLDSQK	1xCarbamidomethyl [C4]	1	1	2	Q9P258	0	1727.84	High	4	D
FALSE	High	ALIAAQYSGAQVR		1	1	2	P26641	0	1347.74	High	4	A
FALSE	High	LNLEAINYMAADGDFK		1	1	2	P09382	0	1784.85	High	4	L
FALSE	High	DFLLPFLEEPMDTEADLQFRPR		1	1	2	O43242	0	2679.31	High	4	D
FALSE	High	TFTDCFNCLPIAAIVDEK	2xCarbamidomethyl [C5; C8]	2	3	6	P62136; P62140	0	2113.99	High	4	T
FALSE	High	EAINVEQAFQTIAR		1	1	2	P51149	0	1589.83	High	4	E
FALSE	High	SDIGEVILVGGMTR		1	1	3	P38646	0	1446.76	High	4	S
FALSE	High	VDEAVAVLQAHQAK		1	2	2	P11940	0	1478.8	High	4	V
FALSE	High	YGGDEIPFSPYR		1	1	2	P21333	0	1400.65	High	4	Y
FALSE	High	EVQGNESDLFMSYFPR		1	1	2	P40121	0	1918.86	High	4	E
FALSE	High	ITPSYVAFTPEGER		1	1	5	P11021	0	1566.78	High	4	I
FALSE	High	YHGHSMSDPGVSYR		1	2	1	P08559	0	1592.69	High	4	Y
FALSE	High	LGTDESCFNMILATR	1xCarbamidomethyl [C7]	1	1	1	P20073	0	1727.81	High	4	L
FALSE	High	ATAGAYIASQTVK		1	1	2	P28074	0	1280.68	High	3.99	A
FALSE	High	HPGSFDVVHVK		1	2	3	P62701	0	1221.64	High	3.99	H
FALSE	High	EFADSLGIPFLETSAK		1	3	7	Q9H0U4	0	1724.87	High	3.99	E
FALSE	High	VGGTSDVEVNEK		1	1	1	P10809	0	1233.6	High	3.99	V
FALSE	High	AINQGGLTSVAVR		1	1	2	P60900	0	1285.72	High	3.99	A
FALSE	High	VLAGETLSVNDPPDVLDR		1	1	3	Q12906	0	1909.99	High	3.99	V
FALSE	High	DCGATWVVLGHSER	1xCarbamidomethyl [C2]	1	1	4	P60174	0	1586.74	High	3.99	D
FALSE	High	MFVLDEADEMLSR		2	2	8	P60842; Q14240	0	1555.71	High	3.99	M
FALSE	High	DLNHVCVISETGK	1xCarbamidomethyl [C6]	1	1	1	P00492	0	1471.72	High	3.99	D
FALSE	High	DIEQVPQQPTYVQALFDFDPQEDGELGFR		1	1	1	P62993	0	3381.59	High	3.99	D
FALSE	High	GSTAPVGGGAFPTIVER		1	1	2	Q15084	0	1615.84	High	3.99	G
FALSE	High	ELQELVQYPVEHPDK		1	1	1	P55072	0	1823.92	High	3.99	E
FALSE	High	YDGQVAVFGSDLQEK		1	1	3	P22314	0	1655.79	High	3.99	Y
FALSE	High	GEELGGGQDPVQLLSGFPR		1	1	2	Q04323	0	1955.98	High	3.99	G
FALSE	High	DHASIQMNVAEVDK		1	1	3	P63220	0	1556.74	High	3.99	D
FALSE	High	LGDDIDLIVR		1	1	2	O15371	0	1128.63	High	3.99	L
FALSE	High	VMQQQQQTTQQQLPQK		1	1	1	Q15459	0	1941.98	High	3.99	V
FALSE	High	VQVQDNEGCPVEALVK	1xCarbamidomethyl [C9]	1	1	3	P21333	0	1784.88	High	3.99	V
FALSE	High	DSPYMAFIHPATGGYNPDLVR		1	1	1	O75369	0	2321.1	High	3.99	D
FALSE	High	LQDVFNTVGADIIQLPQIVVVGTQSSGK		1	1	1	O00429	0	2926.59	High	3.99	L
FALSE	High	RAGELTEDEVER		1	1	2	P62269	1	1403.68	High	3.99	R
FALSE	High	NTGVILANDANAER		1	1	1	P46087	0	1457.73	High	3.98	N
FALSE	High	LLTECPPMMDTEYTK	1xCarbamidomethyl [C5]	1	1	2	P55060	0	1828.82	High	3.98	L
FALSE	High	NAVITVPAYFNDSQR		1	1	3	P38646	0	1694.85	High	3.98	N
FALSE	High	EFAGEDTSDLFLEER		1	1	1	O14980	0	1757.79	High	3.98	E
FALSE	High	LSPPYSSPQEFAQDVGR		1	1	3	Q13263	0	1877.9	High	3.98	L
FALSE	High	IGYNPDTVAFVPISGWNGDNMLEPSANMPWFK	1xOxidation [M]	1	2	3	P68104	0	3583.67	High	3.98	I
FALSE	High	VVVLMGSTSDLGHCEK	1xCarbamidomethyl [C14]	1	1	2	P22234	0	1731.84	High	3.98	V
FALSE	High	ASTEGVAIQGQQGTR		1	1	1	Q92621	0	1502.76	High	3.98	A
FALSE	High	MEGPLSVFGDR	1xAcetyl [N-Term]	1	1	3	P17987	0	1249.59	High	3.98	M
FALSE	High	VSSIDLEIDSLSSLLDDMTK		1	1	5	Q15942	0	2181.08	High	3.97	V
FALSE	High	FGYVDFESAEDLEK		1	1	4	P19338	0	1648.74	High	3.97	F
FALSE	High	TTGFGMIYDSLDYAK		1	1	3	P62847	0	1681.78	High	3.97	T
FALSE	High	LEGLTDEINFLR		1	1	22	P05787	0	1419.75	High	3.97	L
FALSE	High	FNECGHVLYADIK	1xCarbamidomethyl [C4]	1	1	3	P52272	0	1565.74	High	3.97	F
FALSE	High	GQFSTDELVAEVEK		1	2	2	Q00610	0	1551.75	High	3.97	G
FALSE	High	CPQVEEAIVQSGQK	1xCarbamidomethyl [C1]	1	1	1	Q9BVP2	0	1572.77	High	3.97	C
FALSE	High	VSDATGQMNLTK		1	1	2	P40121	0	1264.62	High	3.97	V
FALSE	High	TPAQYDASELK		1	2	4	P07355	0	1222.6	High	3.97	T
FALSE	High	SGLGELILPENEPGSSIMPGK		1	1	3	P07954	0	2125.08	High	3.97	S
FALSE	High	LTDCVVMRDPASK	1xCarbamidomethyl [C4]	1	1	3	P22626	1	1491.73	High	3.97	L
FALSE	High	LILPVGPAGGNQMLEQYDK		1	1	1	P22061	0	2043.06	High	3.97	L
FALSE	High	SRAEAESMYQIK		1	1	4	P05787	1	1412.68	High	3.97	S
FALSE	High	IGNLQTDLSDGLR		1	1	1	O75369	0	1401.73	High	3.97	I
FALSE	High	LGVCFDVPTASVTEIQEK	1xCarbamidomethyl [C4]	1	1	1	Q9NR30	0	1992.99	High	3.97	L
FALSE	High	DAAIYLVTSLASK		1	1	2	P55060	0	1351.75	High	3.96	D
FALSE	High	GMSLNLEPDNVGVVVFGNDK		1	1	4	P25705	0	2104.04	High	3.96	G
FALSE	High	EITAIESSVPCQLLESVLQELK	1xCarbamidomethyl [C11]	1	1	6	O75694	0	2486.31	High	3.96	E
FALSE	High	VCHAHPTLSEAFR	1xCarbamidomethyl [C2]	1	1	1	P09622	0	1524.74	High	3.96	V
FALSE	High	SLPSVETLGCTSVICSDK	2xCarbamidomethyl [C10; C15]	1	3	1	P16615	0	1952.93	High	3.96	S
FALSE	High	CQLEINFNTLQTK	1xCarbamidomethyl [C1]	2	4	2	P12814; O43707	0	1608.81	High	3.96	C
FALSE	High	GGGEELAQLAGVPFLGSVPLDPALMR		1	1	1	Q9Y5Y2	0	2594.36	High	3.96	G
FALSE	High	DDPLTNLNTAFDVAEK		1	1	1	P12814	0	1762.85	High	3.96	D
FALSE	High	CLMDQATDPNILGR	1xCarbamidomethyl [C1]	1	1	2	P78527	0	1603.76	High	3.96	C
FALSE	High	CPNPTCENMNFSWR	2xCarbamidomethyl [C1; C6]	1	1	2	P35637	0	1812.73	High	3.96	C
FALSE	High	LCPGGQLPFLLYGTEVHTDTNK	1xCarbamidomethyl [C2]	1	1	2	O00299	0	2460.22	High	3.96	L
FALSE	High	GVLFGVPGAFTPGCSK	1xCarbamidomethyl [C14]	1	1	3	P30044	0	1593.81	High	3.96	G
FALSE	High	VDQEIINIMQDR		1	1	1	O96000	0	1473.74	High	3.96	V
FALSE	High	KHPDASVNFSEFSK		1	1	2	P09429	1	1592.77	High	3.96	K
FALSE	High	VVDNPIYLSDMGAALTGAESHELQDVLEETNIPK		1	1	2	P36776	0	3668.8	High	3.96	V
FALSE	High	VVNEINIEDLCLTK	1xCarbamidomethyl [C11]	1	1	1	Q8N5K1	0	1659.86	High	3.96	V
FALSE	High	SQLLGSAHEVQR		1	1	1	Q13813	0	1324.7	High	3.96	S
FALSE	High	LNEGVVEFASYGDLK		1	1	1	Q13243	0	1640.82	High	3.96	L
FALSE	High	SNMDNMFESYINNLR		1	1	27	P05787	0	1847.81	High	3.96	S
FALSE	High	TQAYQDQKPGTSGLR		1	1	1	P36871	0	1649.82	High	3.96	T
FALSE	High	IDNSQVESGSLEDDWDFLPPK		1	1	8	P27797	0	2391.1	High	3.96	I
FALSE	High	TQNPMVTGTSVLGVK		1	1	2	P28070	0	1531.81	High	3.95	T
FALSE	High	DFNHINVELSLLGK		1	1	1	P32969	0	1598.85	High	3.95	D
FALSE	High	VWLDPNETNEIANANSR		1	1	5	P84098	0	1942.93	High	3.95	V
FALSE	High	LDLDLTADSQPPVFK		1	1	2	Q13263	0	1658.86	High	3.95	L
FALSE	High	GNINICLMGDPGVAK	1xCarbamidomethyl [C6]	1	1	1	P33993	0	1558.77	High	3.95	G
FALSE	High	SESELIDELSEDFDR		1	1	1	P20810	0	1783.79	High	3.95	S
FALSE	High	DNPGVVTCLDEAR	1xCarbamidomethyl [C8]	1	1	2	P22314	0	1445.67	High	3.95	D
FALSE	High	QYYIGDIHPSDLKPESGSK		1	1	3	O43169	0	2134.05	High	3.95	Q
FALSE	High	VAALTGLPFVTAPNK		1	1	2	P07954	0	1498.86	High	3.95	V
FALSE	High	LPETNLFETEETRK		1	1	2	Q15046	1	1706.86	High	3.95	L
FALSE	High	SQIHDIVLVGGSTR		1	1	6	P11142	0	1481.81	High	3.95	S
FALSE	High	MASTFIGNSTAIQELFK		0	1	4		0	1857.94	High	3.95	M
FALSE	High	ALAPTWEQLALGLEHSETVK		1	1	2	Q8NBS9	0	2193.16	High	3.95	A
FALSE	High	LEGNTVGVEAAR		1	1	1	P46060	0	1215.63	High	3.94	L
FALSE	High	SQIFSTASDNQPTVTIK		1	1	6	P11021	0	1836.93	High	3.94	S
FALSE	High	LTHYHEGLPTTR		1	1	1	Q02809	0	1424.73	High	3.94	L
FALSE	High	EPWLLPSQHNDIIR		1	1	2	Q14697	0	1717.9	High	3.94	E
FALSE	High	LPDIFEAQIAGLR		1	1	6	P08729	0	1442.8	High	3.94	L
FALSE	High	GLTTTGNSSLNSTSNTK		1	1	1	Q96KR1	0	1682.82	High	3.94	G
FALSE	High	NQYDNDVTVWSPQGR		1	1	2	P25786	0	1778.81	High	3.94	N
FALSE	High	CDYENVPTTVFTPLEYGACGLSEEK	2xCarbamidomethyl [C1; C19]	1	1	1	Q16881	0	2879.28	High	3.94	C
FALSE	High	VPAINVNDSVTK		1	1	3	P23526	0	1256.68	High	3.94	V
FALSE	High	VCLEITEDGGDSIEVPGAR	1xCarbamidomethyl [C2]	1	1	1	P36952	0	2016.95	High	3.94	V
FALSE	High	YADLTEDQLPSCESLK	1xCarbamidomethyl [C12]	1	1	5	P18669	0	1868.86	High	3.94	Y
FALSE	High	QTGEGVGPQEYTLLK		1	1	1	Q9P2J5	0	1619.83	High	3.94	Q
FALSE	High	FLGVAEQLHNEGFK		1	1	4	P31327	0	1588.81	High	3.94	F
FALSE	High	ARFEELNADLFR		1	2	1	P11142	1	1480.75	High	3.94	A
FALSE	High	TSAALSTVGSAISR		1	1	1	O43399	0	1320.71	High	3.94	T
FALSE	High	LPEDPLLSGLLDSPALK		1	1	1	P49327	0	1777.99	High	3.94	L
FALSE	High	HEQILVLDPPTDLK		1	1	2	Q9P0L0	0	1617.88	High	3.94	H
FALSE	High	VDQIQEIVTGNPTVIK		1	1	3	P46940	0	1753.97	High	3.94	V
FALSE	High	HYYEVSCHDQGLCR	2xCarbamidomethyl [C7; C13]	1	1	1	Q92499	0	1823.76	High	3.94	H
FALSE	High	DFIDSLGLLHEQNMAK		1	1	1	Q7L2H7	0	1830.91	High	3.93	D
FALSE	High	LVPLLDTGDIIIDGGNSEYR		1	1	3	P52209	0	2160.12	High	3.93	L
FALSE	High	VGEPVALSEEER		1	1	1	Q13435	0	1314.65	High	3.93	V
FALSE	High	HLADHGQLSGIQR		1	1	1	O60783	0	1431.75	High	3.93	H
FALSE	High	YIAENGTDPINNQPLSEEQLIDIK		1	1	2	Q9UMS4	0	2714.35	High	3.93	Y
FALSE	High	GTDVNVFNTILTTR		1	1	5	P04083	0	1550.82	High	3.93	G
FALSE	High	VQIAVANAQELLQR		1	1	1	Q9Y5L4	0	1552.88	High	3.93	V
FALSE	High	DYGVLLEGSGLALR		1	1	3	P30048	0	1462.79	High	3.93	D
FALSE	High	HVVPNEVVVQR		1	1	4	P06396	0	1275.72	High	3.93	H
FALSE	High	GEVTEMFSYEESNPK		1	1	1	Q8TCT9	0	1746.75	High	3.93	G
FALSE	High	DGELPVEDDIDLSDVELDDLGK		1	1	1	Q15084	0	2401.11	High	3.93	D
FALSE	High	LAGFLDLTEQEFR		1	1	1	Q9Y262	0	1538.78	High	3.93	L
FALSE	High	DENLALYVENQFR		1	1	3	P02786	0	1610.78	High	3.93	D
FALSE	High	LPHSVLLEIQK		1	1	1	Q9Y617	0	1276.76	High	3.93	L
FALSE	High	QEYDESGPSIVHR		1	7	7	P60709	0	1516.7	High	3.93	Q
FALSE	High	TAFQEALDAAGDK		1	1	5	P10599	0	1336.64	High	3.93	T
FALSE	High	ESADPLGAWLQDAR		1	1	1	Q15149	0	1528.74	High	3.93	E
FALSE	High	SLEEIYLFSLPIK		1	1	4	P15880	0	1551.87	High	3.93	S
FALSE	High	GLYDGPVCEVSVTPK	1xCarbamidomethyl [C8]	1	1	1	Q16555	0	1620.79	High	3.93	G
FALSE	High	EEETSIDVAGKPNEVTK		1	1	3	P53985	0	1845.91	High	3.93	E
FALSE	High	NDLSPTTVMSEGAR		1	1	1	P30043	0	1477.7	High	3.93	N
FALSE	High	IAPSFAVESIEDALK		1	1	5	P31327	0	1589.84	High	3.93	I
FALSE	High	QMQLENVSVALEFLDR		2	2	1	P21333; O75369	0	1891.96	High	3.93	Q
FALSE	High	GPTEAVGYFLYNLIDSMSDSEVQAK		1	1	4	P42704	0	2734.29	High	3.92	G
FALSE	High	TCDISFSDPDDLLNFK	1xCarbamidomethyl [C2]	1	1	2	P61081	0	1886.85	High	3.92	T
FALSE	High	DNYVPEVSALDQEIIEVDPDTK		1	1	5	P08708	0	2489.19	High	3.92	D
FALSE	High	VDVEVPDVSLEGPEGK		1	1	2	Q09666	0	1668.83	High	3.92	V
FALSE	High	GFQFVSSSLPDICYR	1xCarbamidomethyl [C13]	1	1	1	P62633	0	1775.84	High	3.92	G
FALSE	High	HPSSPECLVSAQK	1xCarbamidomethyl [C7]	1	1	1	Q14980	0	1439.69	High	3.92	H
FALSE	High	EVATNSELVQSGK		1	2	3	Q04695	0	1361.69	High	3.92	E
FALSE	High	IIGATDSSGELMFLMK		1	2	2	Q13185	0	1712.86	High	3.92	I
FALSE	High	TDNAGDQHGGGGGGGGGAGAAGGGGGGENYDDPHK		1	1	1	P14866	0	2981.2	High	3.92	T
FALSE	High	GALQNIIPASTGAAK		1	1	11	P04406	0	1411.79	High	3.92	G
FALSE	High	MDSAGQDINLNSPNK	1xAcetyl [N-Term]	1	1	1	O43399	0	1645.75	High	3.92	M
FALSE	High	LIQNNHYAMEDVATR		1	1	1	Q13813	0	1774.85	High	3.92	L
FALSE	High	ASSTSPVEISEWLDQK		1	1	2	P13804	0	1776.87	High	3.92	A
FALSE	High	VSYGIGDEEHDQEGR		1	1	2	P27695	0	1690.73	High	3.92	V
FALSE	High	EGLAVAEEALVDHVAELTATPR		1	1	1	B0I1T2	0	2291.19	High	3.92	E
FALSE	High	SILQMSLDHHIVTPLTSLVIENEAGDER	1xOxidation [M5]	1	1	8	P19823	0	3133.58	High	3.91	S
FALSE	High	SQNVMAAASIANIVK		1	1	3	P17987	0	1516.82	High	3.91	S
FALSE	High	RLIPDGCGVK	1xCarbamidomethyl [C7]	1	1	1	P27635	1	1114.6	High	3.91	R
FALSE	High	GVMLAVDAVIAELK		1	1	9	P10809	0	1428.81	High	3.91	G
FALSE	High	DPNNLLNDWSQK		1	1	1	O00232	0	1443.69	High	3.91	D
FALSE	High	MDDREDLVYQAK	1xAcetyl [N-Term]	1	1	3	P62258	1	1524.7	High	3.91	M
FALSE	High	AEISCTDNQDGTCSVSYLPVLPGDYSILVK	2xCarbamidomethyl [C5; C13]	1	1	3	P21333	0	3301.56	High	3.91	A
FALSE	High	GPELLTMWFGESEANVR	1xOxidation [M7]	1	1	1	P55072	0	1951.92	High	3.91	G
FALSE	High	MVGDVTGAQAYASTAK		1	3	2	Q01629	0	1569.76	High	3.91	M
FALSE	High	TTDGVYEGVAIGGDR		1	1	1	P53396	0	1509.72	High	3.91	T
FALSE	High	VQSDGQIVLVDDWIK		1	1	2	Q08211	0	1714.9	High	3.91	V
FALSE	High	FSALQQAVPTESTDNRR		1	1	1	Q04637	1	1919.96	High	3.91	F
FALSE	High	EINDCIGGTVLNISK	1xCarbamidomethyl [C5]	1	1	2	O76021	0	1632.83	High	3.91	E
FALSE	High	SELSGNFEQVIVGMMTPTVLYDVQELR		1	1	1	P09525	0	3055.51	High	3.91	S
FALSE	High	VIVVGNPANTNCLTASK	1xCarbamidomethyl [C12]	1	1	3	P40925	0	1757.92	High	3.91	V
FALSE	High	LGGEVSCLVAGTK	1xCarbamidomethyl [C7]	1	1	2	P13804	0	1290.67	High	3.91	L
FALSE	High	EQTADGVAVIPVLQR		1	1	2	Q9UKK9	0	1595.88	High	3.91	E
FALSE	High	VGMVETNSQDRPVDDVK		1	1	1	Q9Y3C6	0	1888.91	High	3.91	V
FALSE	High	LASEILMQNWDAAMEDLTR		1	1	2	P60228	0	2207.05	High	3.9	L
FALSE	High	VTAIHIDPATHR		1	1	1	P49327	0	1330.72	High	3.9	V
FALSE	High	APNTPDILEIEFKK		1	1	1	P00966	1	1614.87	High	3.9	A
FALSE	High	TVDFTQDSNYLLTGGQDK		1	1	1	Q9Y3F4	0	2001.94	High	3.9	T
FALSE	High	DGEEAGAYDGPR		1	1	2	P30101	0	1236.51	High	3.9	D
FALSE	High	IEDGNDFGVAIQEK		1	1	2	Q9UL46	0	1534.74	High	3.9	I
FALSE	High	LEVEANNAFDQYR		1	1	2	P47756	0	1568.73	High	3.9	L
FALSE	High	DMDLVEVNEAFAPQYLAVER		1	1	1	P42765	0	2309.11	High	3.9	D
FALSE	High	LEDLLQDAQDEK		1	1	1	Q15149	0	1416.69	High	3.9	L
FALSE	High	SNGLGPVMSGNTAYPVISCPPLTPDWGVQDVWSSLR	1xCarbamidomethyl [C19]	1	1	3	P22234	0	3857.86	High	3.9	S
FALSE	High	YYTSASGDEMVSLK		1	1	3	P07900	0	1550.7	High	3.9	Y
FALSE	High	EVESMGAHLNAYSTR		1	1	1	P31930	0	1664.77	High	3.9	E
FALSE	High	ETNLDSLPLVDTHSK		1	1	6	P08670	0	1668.84	High	3.9	E
FALSE	High	FDEILEASDGIMVAR		1	1	4	P14618	0	1665.82	High	3.9	F
FALSE	High	FDQLFDDESDPFEVLK		1	1	9	Q8NC51	0	1943.89	High	3.9	F
FALSE	High	VLNSYWVGEDSTYK		1	1	3	P61313	0	1660.79	High	3.89	V
FALSE	High	HSQFIGYPITLFVEK		1	2	14	P07900	0	1778.95	High	3.89	H
FALSE	High	QYMEGFNDELEAFK		1	1	1	Q16543	0	1720.75	High	3.89	Q
[truncated: 4,551 more rows]

## Sheet: Supp Table S2 - Control B
Checked	Confidence	Sequence	Modifications	# Protein Groups	# Proteins	# PSMs	Master Protein Accessions	# Missed Cleavages	Theo. MH+ [Da]	Confidence (by Search Engine): Sequest HT	XCorr (by Search Engine): Sequest HT	First Amino Acid
FALSE	High	VISHAISEHVEDAGVHSGDATLMLPTQTISQGAIEK		1	1	1	P31327	0	3741.88	High	9.04	V
FALSE	High	FLNEHPGGEEVLLEQAGVDASESFEDVGHSSDAR		1	1	2	O43169	0	3627.65	High	8.14	F
FALSE	High	GINPDEAVAYGAAVQAGVLSGDQDTGDLVLLDVCPLTLGIETVGGVMTK	1xCarbamidomethyl [C34]	1	1	10	P11021	0	4899.46	High	8.03	G
FALSE	High	ALANVNIGSLICNVGAGGPAPAAGAAPAGGPAPSTAAAPAEEK	1xCarbamidomethyl [C12]	1	1	18	P05386	0	3808.93	High	7.95	A
FALSE	High	FQSSAVMALQEASEAYLVGLFEDTNLCAIHAK	1xCarbamidomethyl [C27]	1	1	24	Q71DI3	0	3513.7	High	7.9	F
FALSE	High	TNHIGHTGYLNTVTVSPDGSLCASGGK	1xCarbamidomethyl [C22]	1	1	3	P63244	0	2743.31	High	7.9	T
FALSE	High	LPGEGAALADACEAMVAVMAALGVAVDGGK	1xCarbamidomethyl [C12]	1	1	1	O15067	0	2814.38	High	7.89	L
FALSE	High	FQSAAIGALQEASEAYLVGLFEDTNLCAIHAK	1xCarbamidomethyl [C27]	1	1	18	P84243	0	3437.7	High	7.86	F
FALSE	High	SQDDEIGDGTTGVVVLAGALLEEAEQLLDR		1	1	1	P48643	0	3113.55	High	7.85	S
FALSE	High	VIHDNFGIVEGLMTTVHAITATQK		1	1	27	P04406	0	2595.36	High	7.83	V
FALSE	High	GGLGGGYGGASGMGGITAVTVNQSLLSPLVLEVDPNIQAVR		1	1	12	P05787	0	3925.05	High	7.8	G
FALSE	High	VAVSADPNVPNVVVTGLTLVCSSAPGPLELDLTGDLESFK	1xCarbamidomethyl [C21]	1	1	7	P52565	0	4081.1	High	7.77	V
FALSE	High	TPAVEGLTEAEEEELRAELTK		1	1	1	O43399	1	2315.16	High	7.71	T
FALSE	High	RNDFQLIGIQDGYLSLLQDSGEVR		1	1	14	P63241	1	2736.4	High	7.67	R
FALSE	High	GQHVTGSPFQFTVGPLGEGGAHK		1	1	1	O75369	0	2308.15	High	7.65	G
FALSE	High	AFLADPSAFVAAAPVAAATTAAPAAAAAPAK		1	1	18	P05388	0	2752.47	High	7.61	A
FALSE	High	ADHQPLTEASYVNLPTIALCNTDSPLR	1xCarbamidomethyl [C20]	1	1	10	P08865	0	2996.48	High	7.57	A
FALSE	High	ELEQVCNPIISGLYQGAGGPGPGGFGAQGPK	1xCarbamidomethyl [C6]	1	1	15	P0DMV9	0	3055.49	High	7.57	E
FALSE	High	MAEIGEHVAPSEAANSLEQAQAAAER		1	1	1	P27708	0	2680.26	High	7.54	M
FALSE	High	HIADLAGNSEVILPVPAFNVINGGSHAGNK		1	1	10	P06733	0	3011.57	High	7.52	H
FALSE	High	TGPAATTLPDGAAAESLVESSEVAVIGFFK		1	1	5	P07237	0	2935.49	High	7.45	T
FALSE	High	FQSSAVMALQEACEAYLVGLFEDTNLCAIHAK	2xCarbamidomethyl [C13; C27]	1	1	13	P68431	0	3586.7	High	7.44	F
FALSE	High	CDVTQSQPLGAVPLPPADCVLSTLCLDAACPDLPTYCR	5xCarbamidomethyl [C1; C19; C25; C30; C37]	1	1	5	P40261	0	4230.96	High	7.44	C
FALSE	High	AQAALQAVNSVQSGNLALAASAAAVDAGMAMAGQSPVLR		1	1	11	P26599	0	3680.88	High	7.42	A
FALSE	High	YTLPPGVDPTQVSSSLSPEGTLTVEAPMPK		1	1	9	P04792	0	3098.56	High	7.33	Y
FALSE	High	HTGPGILSMANAGPNTNGSQFFICTAK	1xCarbamidomethyl [C24]; 1xOxidation [M9]	1	1	1	P62937	0	2807.32	High	7.21	H
FALSE	High	HSSVYPTQEELEAVQNMVSHTER		1	1	3	Q12906	0	2671.24	High	7.19	H
FALSE	High	RPQYSNPPVQGEVMEGADNQGAGEQGRPVR		1	1	2	P67809	0	3223.53	High	7.17	R
FALSE	High	HTGPGILSMANAGPNTNGSQFFICTAK	1xCarbamidomethyl [C24]	1	1	3	P62937	0	2791.33	High	7.17	H
FALSE	High	ILTVEDHYYEGGIGEAVSSAVVGEPGITVTHLAVNR		1	1	4	P29401	0	3752.91	High	7.16	I
FALSE	High	AEGSDVANAVLDGADCIMLSGETAK	1xCarbamidomethyl [C16]	1	1	31	P14618	0	2494.14	High	7.15	A
FALSE	High	CPEALFQPSFLGMESCGIHETTFNSIMK	2xCarbamidomethyl [C1; C16]	1	2	53	P60709	0	3231.46	High	7.15	C
FALSE	High	TEGNIDDSLIGGNASAEGPEGEGTESTVITGVDIVMNHHLQETSFTK		1	1	1	P13693	0	4857.26	High	7.14	T
FALSE	High	NPNAMLVNLEEPLASTYQDILYQAK		1	1	5	P46940	0	2835.42	High	7.12	N
FALSE	High	TTGIVMDSGDGVTHTVPIYEGYALPHAILR		1	2	45	P60709	0	3183.61	High	7.1	T
FALSE	High	NPQQHLNAQPQVTMQQPAVHVQGQEPLTASMLASAPPQEQK		1	1	1	P11940	0	4457.21	High	7.08	N
FALSE	High	GNFGGSFAGSFGGAGGHAPGVAR		1	1	1	P52272	0	2034.95	High	7.08	G
FALSE	High	DGVADVSIEDSVISLSGDHCIIGR	1xCarbamidomethyl [C20]	1	1	7	P00441	0	2514.21	High	7.07	D
FALSE	High	TALLDAAGVASLLTTAEVVVTEIPK		1	1	16	P10809	0	2482.4	High	7.06	T
FALSE	High	NMITGTSQADCAVLIVAAGVGEFEAGISK	1xCarbamidomethyl [C11]	1	3	51	P68104	0	2909.44	High	7.04	N
FALSE	High	QRQEEPPPGPQRPDQSAAAAGPGDPK		1	1	1	Q9BQ61	1	2681.3	High	7.02	Q
FALSE	High	LNCQVIGASVDSHFCHLAWVNTPK	2xCarbamidomethyl [C3; C15]	1	1	7	Q06830	0	2753.33	High	7.01	L
FALSE	High	FGGEHVPNSPFQVTALAGDQPSVQPPLR		1	1	2	P21333	0	2945.49	High	7	F
FALSE	High	ALVLDCHYPEDEVGQEDEAESDIFSIR	1xCarbamidomethyl [C6]	1	1	14	Q07021	0	3136.41	High	6.98	A
FALSE	High	VGTDMLEEQITAFEDYVQSMDVAAFNK		1	1	10	P24534	0	3051.4	High	6.96	V
FALSE	High	EGICALGGTSELSSEGTQHSYSEEEK	1xCarbamidomethyl [C4]	1	1	2	P13797	0	2785.21	High	6.93	E
FALSE	High	RPLIDQVVQTALSETQDPEEVSVTVK		1	1	10	Q00610	0	2881.52	High	6.91	R
FALSE	High	LGLGIDEDDPTADDTSAAVTEEMPPLEGDDDTSR		1	1	5	P07900	0	3547.54	High	6.91	L
FALSE	High	QAFTDVATGSLGQGLGAACGMAYTGK	1xCarbamidomethyl [C19]	1	1	7	P29401	0	2532.19	High	6.89	Q
FALSE	High	AIVDCGFEHPSEVQHECIPQAILGMDVLCQAK	3xCarbamidomethyl [C5; C17; C29]	2	2	13	O00148; Q13838	0	3651.71	High	6.87	A
FALSE	High	SENVQDLLLLDVAPLSLGLETAGGVMTALIK		1	1	4	P0DMV9	0	3180.74	High	6.85	S
FALSE	High	VIQGLYSGVTTVELDTLAAETAATLTTK		1	1	6	P23921	0	2866.53	High	6.84	V
FALSE	High	AHIANPSGASTECFVTDNADGTYQVEYTPFEK	1xCarbamidomethyl [C13]	1	1	1	O75369	0	3519.56	High	6.82	A
FALSE	High	LASPSGSTSSGLEVVAPEGTSAPGGGPGTLDDSATICR	1xCarbamidomethyl [C37]	1	1	1	Q13263	0	3558.69	High	6.82	L
FALSE	High	DGTVTAGNASGVADGAGAVIIASEDAVK		1	1	2	P42765	0	2516.25	High	6.82	D
FALSE	High	GILGYTEHQVVSSDFNSDTHSSTFDAGAGIALNDHFVK		1	1	15	P04406	0	4036.89	High	6.8	G
FALSE	High	AFADALEVIPMALSENSGMNPIQTMTEVR		1	1	6	P48643	0	3135.52	High	6.73	A
FALSE	High	SPEEGAETPVYLALLPPDAEGPHGQFVSEK		1	1	2	P16152	0	3164.54	High	6.72	S
FALSE	High	DGEDQTQDTELVETRPAGDGTFQK		1	3	2	P10321	0	2637.19	High	6.71	D
FALSE	High	VGAGAPVYMAAVLEYLTAEILELAGNAAR		1	2	1	Q16777	0	2933.54	High	6.7	V
FALSE	High	ASASGSGAQVGGPISSGSSASSVTVTR		1	1	2	P02545	0	2365.16	High	6.7	A
FALSE	High	EETVLATVQALQTASHLSQQADLR		1	1	1	P04844	0	2609.35	High	6.69	E
FALSE	High	LVEGTINPGETCLIIEDVVTSGSSVLETVEVLQK	1xCarbamidomethyl [C12]	1	1	2	P11172	0	3628.89	High	6.69	L
FALSE	High	VNLSQDLEHQLQNIIQELNLEILPPPEDPSVPVALNIGK		1	1	2	Q08211	0	4327.32	High	6.68	V
FALSE	High	IGEEQSAEDAEDGPPELLFIHGGHTAK		1	1	1	Q16576	0	2847.34	High	6.65	I
FALSE	High	MDPFLVLLHSVSSSLSSSELTELK	1xAcetyl [N-Term]	1	1	1	Q13158	0	2661.37	High	6.65	M
FALSE	High	YDCGEEILITVLSAMTEEAAVAIK	1xCarbamidomethyl [C3]	1	2	3	P63241	0	2626.3	High	6.65	Y
FALSE	High	AQGPAASAEEPKPVEAPAANSDQTVTVKE		1	1	2	P80723	1	2892.42	High	6.62	A
FALSE	High	VPAFEGDDGFCVFESNAIAYYVSNEELR	1xCarbamidomethyl [C11]	1	1	5	P26641	0	3198.44	High	6.62	V
FALSE	High	QFAPIHAEAPEFMEMSVEQEILVTGIK		1	1	7	P06576	0	3044.51	High	6.6	Q
FALSE	High	INALTAASEAACLIVSVDETIK	1xCarbamidomethyl [C12]	1	1	9	Q99832	0	2289.2	High	6.6	I
FALSE	High	IQQLVQDIASLTLLEISDLNELLK		1	1	1	P52815	0	2709.53	High	6.6	I
FALSE	High	TTIPEEEEEEEEAAGVVVEEELFHQQGTPR		1	1	2	P20700	0	3411.57	High	6.59	T
FALSE	High	SENVQDLLLLDVTPLSLGIETAGGVMTVLIK		1	1	1	P11142	0	3238.79	High	6.59	S
FALSE	High	ADRDESSPYAAMLAAQDVAQR		1	1	3	P62263	1	2265.06	High	6.58	A
FALSE	High	VGATAAVYSAAILEYLTAEVLELAGNASK		1	2	2	Q71UI9	0	2895.53	High	6.57	V
FALSE	High	MVAAATNNLCEAANAAVQGHASQEK	1xCarbamidomethyl [C10]	1	1	1	Q9Y490	0	2556.19	High	6.56	M
FALSE	High	DQAVENILVSPVVVASSLGLVSLGGK		1	1	10	P50454	0	2551.43	High	6.56	D
FALSE	High	VDEFPLCGHMVSDEYEQLSSEALEAAR	1xCarbamidomethyl [C7]	1	1	13	P27635	0	3082.38	High	6.56	V
FALSE	High	APKPDGPGGGPGGSHMGGNYGDDR		1	1	5	P35637	0	2252.97	High	6.55	A
FALSE	High	LQVEPAVDTSGVQCYGPGIEGQGVFR	1xCarbamidomethyl [C14]	1	1	3	P21333	0	2763.34	High	6.54	L
FALSE	High	MFQSTAGSGGVQEDALMAVSTLVEVLGGEFLK		1	1	1	Q14974	0	3271.62	High	6.54	M
FALSE	High	SGETEDTFIADLVVGLCTGQIK	1xCarbamidomethyl [C17]	1	3	31	P06733	0	2353.16	High	6.53	S
FALSE	High	SKDDQVTVIGAGVTLHEALAAAELLK		1	1	6	P29401	1	2649.45	High	6.5	S
FALSE	High	EGNDLYHEMIESGVINLK		1	1	5	P06576	0	2061	High	6.5	E
FALSE	High	IIPTLEEGLQLPSPTATSQLPLESDAVECLNYQHYK	1xCarbamidomethyl [C29]	1	1	22	P61978	0	4055.03	High	6.5	I
FALSE	High	ALVDHENVISCPHLGASTK	1xCarbamidomethyl [C11]	1	1	4	O43175	0	2048.02	High	6.5	A
FALSE	High	FTLDCTHPVEDGIMDAANFEQFLQER	1xCarbamidomethyl [C5]	1	1	13	P35268	0	3083.39	High	6.49	F
FALSE	High	DNGPDGMEPEGVIESNWNEIVDSFDDMNLSESLLR		1	1	3	P60842	0	3923.72	High	6.48	D
FALSE	High	CISEVQANNVVLGQYVGNPDGEGEATK	1xCarbamidomethyl [C1]	1	1	1	P11413	0	2848.34	High	6.48	C
FALSE	High	FEALAAHDALVELSGAMNTTACSLMK	1xCarbamidomethyl [C22]	1	1	6	P07954	0	2751.32	High	6.48	F
FALSE	High	ASEPGLAQLLVDQIYENAMIAAGLVDDPR		1	1	1	Q12931	0	3069.56	High	6.47	A
FALSE	High	TFSHELSDFGLESTAGEIPVVAIR		1	1	19	P30101	0	2575.3	High	6.45	T
FALSE	High	LGEVSVESENYVQAVEEFQSCLNLQEQYLEAHDR	1xCarbamidomethyl [C21]	1	1	4	P49321	0	4012.85	High	6.45	L
FALSE	High	WSGPLSLQEVDEQPQHPLHVTYAGAAVDELGK		1	1	9	P30086	0	3471.72	High	6.44	W
FALSE	High	IGEGLDQALPCLTELILTNNSLVELGDLDPLASLK	1xCarbamidomethyl [C11]	1	1	2	P09661	0	3734.98	High	6.43	I
FALSE	High	LLEDGEDFNLGDALDSSNSMQTIQK		1	1	15	P05783	0	2740.26	High	6.41	L
FALSE	High	KGAVAEDGDELRTEPEAK		1	1	1	P27695	2	1914.94	High	6.4	K
FALSE	High	VEQIAAIAQELNELDYYDSHNVNTR		1	1	3	O43707	0	2905.4	High	6.39	V
FALSE	High	EAMQQADDWLGIPQVITPEEIVDPNVDEHSVMTYLSQFPK		1	1	6	P21333	0	4570.18	High	6.38	E
FALSE	High	EFFPLDESGNVVPSDTNILDTWAAMEELVDEGLVK		1	1	2	P15121	0	3879.85	High	6.38	E
FALSE	High	GYSFGHPSSVAGEVVFNTGLGGYPEAITDPAYK		1	1	6	P31327	0	3387.62	High	6.37	G
FALSE	High	QVYEEEYGSSLEDDVVGDTSGYYQR		1	1	2	P08758	0	2888.24	High	6.37	Q
FALSE	High	DLLPSDMAVALLEAQAGTGHIIDPATSAR		1	1	5	Q15149	0	2933.5	High	6.37	D
FALSE	High	TGDFQLHTNVNDGTEFGGSIYQK		1	1	2	P45880	0	2528.17	High	6.36	T
FALSE	High	NMGGPYGGGNYGPGGSGGSGGYGGR		1	1	5	P22626	0	2189.91	High	6.36	N
FALSE	High	DLTDGHFENILADNSVNDQTK		1	1	4	P36952	0	2346.08	High	6.36	D
FALSE	High	AVTNEPEEEELATLSEEEIAMAVTAWEK		1	1	4	P56192	0	3119.46	High	6.33	A
FALSE	High	VPGPVQQALQSAEMSLDEIEQVILVGGATR		1	1	1	Q9Y4L1	0	3135.64	High	6.33	V
FALSE	High	SLAGSSGPGASSGTSGDHGELVVR		1	1	3	P29692	0	2185.05	High	6.33	S
FALSE	High	ERLEQQVPVNQVFGQDEMIDVIGVTK		1	1	2	P39023	1	2971.52	High	6.32	E
FALSE	High	MPDGPVALEESYSAVMGIVSEVEQYVK		1	1	1	Q14204	0	2927.41	High	6.32	M
FALSE	High	IEPELDGSAQVTSHDASTNGLINFIK		1	1	2	P06744	0	2756.37	High	6.31	I
FALSE	High	FQSSHHPTDITSLDQYVER		1	1	2	P14625	0	2260.06	High	6.3	F
FALSE	High	VAPEEHPVLLTEAPLNPK		1	2	21	P60709	0	1954.06	High	6.3	V
FALSE	High	INNVIDNLIVAPGTFEVQIEEVR		1	1	5	Q12905	0	2582.38	High	6.29	I
FALSE	High	EIAEAYLGYPVTNAVITVPAYFNDSQR		1	1	12	P0DMV9	0	3001.49	High	6.27	E
FALSE	High	LVQDVANNTNEEAGDGTTTATVLAR		1	1	5	P10809	0	2560.25	High	6.26	L
FALSE	High	EQQEAIEHIDEVQNEIDRLNEQASEEILK		1	1	9	Q01105	1	3449.67	High	6.25	E
FALSE	High	VHAELADVLTEAVVDSILAIK		1	1	6	P40227	0	2206.23	High	6.24	V
FALSE	High	LVEALCAEHQINLIK	1xCarbamidomethyl [C6]	1	1	4	P25398	0	1750.95	High	6.21	L
FALSE	High	TAMSTPHVAEPAENEQDEQDENGAEASADLR		1	1	2	P26038	0	3312.42	High	6.21	T
FALSE	High	FWEVISDEHGIDPTGTYHGDSDLQLER		1	2	13	P68371	0	3116.42	High	6.21	F
FALSE	High	LNFSHGTHEYHAETIK		1	1	8	P14618	0	1883.9	High	6.21	L
FALSE	High	LGLGIDEDEVAAEEPNAAVPDEIPPLEGDEDASR		1	1	13	P08238	0	3532.64	High	6.2	L
FALSE	High	VGEAGLLSVDCSEAGPGALGLEAVSDSGTK	1xCarbamidomethyl [C11]	1	1	1	O75369	0	2846.37	High	6.2	V
FALSE	High	EAESCDCLQGFQLTHSLGGGTGSGMGTLLISK	2xCarbamidomethyl [C5; C7]	2	5	56	P07437; P68371	0	3311.53	High	6.19	E
FALSE	High	EVAAFAQFGSDLDAATQQLLSR		1	1	15	P25705	0	2338.17	High	6.19	E
FALSE	High	FLESGGQDGAGDDDDLEDLEEAEEPDMEEDDDQK		1	1	2	P07237	0	3757.45	High	6.19	F
FALSE	High	IGDLQAFQGHGAGNLAGLK		1	1	2	P08195	0	1866.98	High	6.18	I
FALSE	High	ACANPAAGSVILLENLR	1xCarbamidomethyl [C2]	1	1	12	P00558	0	1768.94	High	6.18	A
FALSE	High	IGEHTPSALAIMENANVLAR		1	1	25	P04075	0	2107.1	High	6.17	I
FALSE	High	MDLIDLEDETIDAEVMNSLAVTMDDFR		1	1	1	P55072	0	3101.4	High	6.17	M
FALSE	High	LTLYDIAHTPGVAADLSHIETK		1	1	3	P40926	0	2365.24	High	6.17	L
FALSE	High	NDPPMEAAGFTAQVIILNHPGQISAGYAPVLDCHTAHIACK	2xCarbamidomethyl [C33; C40]	1	1	4	P68104	0	4385.13	High	6.16	N
FALSE	High	HGEVCPAGWKPGSDTIKPDVQK	1xCarbamidomethyl [C5]	1	1	6	Q06830	0	2406.19	High	6.16	H
FALSE	High	FDPTQFQDCIIQGLTETGTDLEAVAK	1xCarbamidomethyl [C9]	1	1	8	Q7L1Q6	0	2897.39	High	6.15	F
FALSE	High	EQDQRPLHPVANPHAEISTK		1	1	1	Q9NX58	0	2267.15	High	6.15	E
FALSE	High	GGMGSGGLATGIAGGLAGMGGIQNEK		1	1	6	P05783	0	2261.1	High	6.14	G
FALSE	High	EAMQQADDWLGVPQVITPEEIIHPDVDEHSVMTYLSQFPK		1	1	7	O75369	0	4593.2	High	6.14	E
FALSE	High	YHVPVVVVPEGSASDTHEQAILR		1	1	1	P04844	0	2503.29	High	6.13	Y
FALSE	High	ADDPSSYMEVVQAANTSGNWEELVK		1	1	5	Q00610	0	2740.24	High	6.12	A
FALSE	High	TSSAQVEGGVHSLHSYEK		1	1	2	P12268	0	1915.91	High	6.12	T
FALSE	High	ALQSGQCAGAALDVFTEEPPRDR	1xCarbamidomethyl [C7]	1	1	5	O43175	1	2488.19	High	6.11	A
FALSE	High	AYHEQLTVAEITNACFEPANQMVK	1xCarbamidomethyl [C15]	1	1	2	Q9BQE3	0	2764.31	High	6.11	A
FALSE	High	IEVQDTSGGTTALRPSASTQALSSSVSSSK		1	1	1	Q16531	0	2952.48	High	6.1	I
FALSE	High	HASGGSTVHIHPQAAPVVCR	1xCarbamidomethyl [C19]	1	1	1	Q7Z6Z7	0	2081.05	High	6.09	H
FALSE	High	EDAPIGPHLQSMPSEQIR		1	1	1	Q14152	0	2004.98	High	6.08	E
FALSE	High	GQHVPGSPFQFTVGPLGEGGAHK		1	2	1	P21333	0	2304.15	High	6.07	G
FALSE	High	TATESFASDPILYRPVAVALDTK		1	1	25	P14618	0	2465.29	High	6.07	T
FALSE	High	LCYVALDFEQEMATAASSSSLEK	1xCarbamidomethyl [C2]	1	3	168	P60709	0	2550.17	High	6.06	L
FALSE	High	CGQEEHDVLLSNEEDRK	1xCarbamidomethyl [C1]	1	1	1	Q9UGI8	1	2057.92	High	6.04	C
FALSE	High	DDEAAAVALSSLIHALDDLDMVAIVR		1	1	1	P13010	0	2723.39	High	6.04	D
FALSE	High	VAVSADPNVPNVVVTGLTLVCSSAPGPLELDLTGDLESFKK	1xCarbamidomethyl [C21]	1	1	2	P52565	1	4209.2	High	6.03	V
FALSE	High	IAAQDLLLAVATDFQNESAAALAAAATR		1	1	10	Q96P70	0	2786.47	High	6.03	I
FALSE	High	GAAAAATGQPGTAPAGTPGAPPLAGMAIVK		1	1	2	Q13263	0	2572.36	High	6.02	G
FALSE	High	GGPGSAVSPYPTFNPSSDVAALHK		1	1	3	P04083	0	2356.16	High	6.02	G
FALSE	High	LGSAADFLLDISETDLSSLTASIK		1	1	14	O75369	0	2467.28	High	6	L
FALSE	High	EGPYDVVVLPGGNLGAQNLSESAAVK		1	1	8	Q99497	0	2584.33	High	6	E
FALSE	High	LAYVAAGDLAPINAFIGGLAAQEVMK		1	1	9	P22314	0	2603.39	High	6	L
FALSE	High	LGDPAEYAHLVQAIIENPFLNGEVIR		1	1	8	Q99714	0	2878.51	High	6	L
FALSE	High	AYHEQLSVAEITNACFEPANQMVK	1xCarbamidomethyl [C15]	2	5	5	Q71U36; P68366	0	2750.29	High	5.99	A
FALSE	High	MEDSMDMDMSPLRPQNYLFGCELK	1xAcetyl [N-Term]; 1xCarbamidomethyl [C21]	1	1	18	P06748	0	2949.26	High	5.99	M
FALSE	High	SHYADVDPENQNFLLESNLGK		1	1	2	Q96QD8	0	2390.13	High	5.97	S
FALSE	High	EMEENFAVEAANYQDTIGR		1	1	6	P08670	0	2186.97	High	5.96	E
FALSE	High	NNQFQALLQYADPVSAQHAK		1	1	5	P26599	0	2243.12	High	5.96	N
FALSE	High	IGYNPDTVAFVPISGWNGDNMLEPSANMPWFK		1	2	15	P68104	0	3567.67	High	5.96	I
FALSE	High	NADMSEEMQQDSVECATQALEK	1xCarbamidomethyl [C15]	1	1	3	P63167	0	2514.04	High	5.96	N
FALSE	High	FGQAATMEGIGAIGGTPPAFNR		1	1	2	Q15233	0	2163.07	High	5.96	F
FALSE	High	SPDVGLYGVIPECGETYHSDLAEAK	1xCarbamidomethyl [C13]	1	1	2	P46940	0	2707.26	High	5.96	S
FALSE	High	LEGDLTGPSVGVEVPDVELECPDAK	1xCarbamidomethyl [C21]	1	1	2	Q09666	0	2625.26	High	5.95	L
FALSE	High	VHSPSGALEECYVTEIDQDK	1xCarbamidomethyl [C11]	1	1	1	P21333	0	2277.03	High	5.95	V
FALSE	High	GHNGWVTQIATTPQFPDMILSASR		1	1	2	P63244	0	2627.3	High	5.95	G
FALSE	High	NPGVGNGDDEAAELMQQVNVLK		1	1	1	Q15691	0	2298.1	High	5.94	N
FALSE	High	DLYANTVLSGGTTMYPGIADR		1	2	25	P60709	0	2215.07	High	5.94	D
FALSE	High	VLSEDEEDVDFDIIHNANDTFTVK		1	1	3	O75369	0	2765.28	High	5.94	V
FALSE	High	AAEAAAAPAESAAPAAGEEPSK		1	1	4	P80723	0	1966.94	High	5.94	A
FALSE	High	TPQGPPEIYSDTQFPSLQSTAK		1	1	1	Q9UKY7	0	2392.17	High	5.94	T
FALSE	High	RAEDGSVIDYELIDQDAR		1	1	4	P07355	1	2064.98	High	5.94	R
FALSE	High	QNFTEPTAIQAQGWPVALSGLDMVGVAQTGSGK		1	1	4	P17844	0	3358.67	High	5.93	Q
FALSE	High	EADIDGDGQVNYEEFVQMMTAK		1	1	17	P0DP25	0	2490.08	High	5.93	E
FALSE	High	FQPGETLTEILETPATSEQEAEHQR		1	1	3	P46940	0	2841.35	High	5.91	F
FALSE	High	TLNETELTELQSQISDTSVVLSMDNSR		1	1	7	P08729	0	3010.45	High	5.91	T
FALSE	High	ELASQPDVDGFLVGGASLKPEFVDIINAK		1	1	22	P60174	0	3029.58	High	5.91	E
FALSE	High	AFADAMEVIPSTLAENAGLNPISTVTELR		1	1	6	P50991	0	3030.55	High	5.91	A
FALSE	High	LADDVDLEQVANETHGHVGADLAALCSEAALQAIR	1xCarbamidomethyl [C26]	1	1	4	P55072	0	3672.79	High	5.91	L
FALSE	High	IPSAVGYQPTLATDMGTMQER		1	1	5	P06576	0	2266.08	High	5.9	I
FALSE	High	MDTEGFGELLQQAEQLAAETEGISELPHVER	1xAcetyl [N-Term]	1	1	2	Q8N1F7	0	3469.64	High	5.9	M
FALSE	High	VETGVLKPGMVVTFAPVNVTTEVK		1	2	24	P68104	0	2515.38	High	5.9	V
FALSE	High	QPYAVSELAGHQTSAESWGTGR		1	1	3	P36578	0	2332.1	High	5.9	Q
FALSE	High	TAAFLLPILSQIYSDGPGEALR		1	1	6	O00571	0	2332.25	High	5.9	T
FALSE	High	AAEAAAAPAESAAPAAGEEPSKEEGEPK		1	1	3	P80723	1	2636.23	High	5.9	A
FALSE	High	MDLAAAAEPGAGSQHLEVR	1xAcetyl [N-Term]	1	1	2	Q14566	0	1964.95	High	5.89	M
FALSE	High	LASVPAGGAVAVSAAPGSAAPAAGSAPAAAEEK		1	1	7	P05387	0	2774.43	High	5.89	L
FALSE	High	IIENAENEYQTAISENYQTMSDTTFK		1	1	1	P52907	0	3040.37	High	5.89	I
FALSE	High	LLDFGSLSNLQVTQPTVGMNFK		1	1	14	P08708	0	2409.25	High	5.89	L
FALSE	High	HAVSDPSILDSLDLNEDEREVLINNINR		1	1	1	P05198	1	3190.6	High	5.89	H
FALSE	High	ISGETIFVTAPHEATAGIIGVNR		1	1	2	Q00610	0	2353.25	High	5.88	I
FALSE	High	EAHQLFLEPEVLDPESVELK		1	1	3	P39748	0	2322.19	High	5.88	E
FALSE	High	ASGPGLNTTGVPASLPVEFTIDAK		1	1	3	P21333	0	2342.22	High	5.87	A
FALSE	High	QFLQAAEAIDDIPFGITSNSDVFSK		1	1	14	P07237	0	2713.34	High	5.87	Q
FALSE	High	YGPQYGHPPPPPPPPEYGPHADSPVLMVYGLDQSK		1	1	1	P14866	0	3784.81	High	5.87	Y
FALSE	High	IFVGNVDGADTTPEELAALFAPYGTVMSCAVMK	1xCarbamidomethyl [C29]	1	1	3	Q96PK6	0	3474.66	High	5.87	I
FALSE	High	LDTNSDGQLDFSEFLNLIGGLAMACHDSFLK	1xCarbamidomethyl [C25]	1	1	7	P31949	0	3428.61	High	5.87	L
FALSE	High	TCNVLVALEQQSPDIAQGVHLDR	1xCarbamidomethyl [C2]	1	1	2	P31153	0	2563.29	High	5.87	T
FALSE	High	SINPDEAVAYGAAVQAAILSGDK		1	1	28	P11142	0	2260.15	High	5.87	S
FALSE	High	EGRPSGEAFVELESEDEVK		1	1	1	P31943	0	2106.98	High	5.86	E
FALSE	High	LDQGGVIQDFINALDQLSNPELLFK		1	1	1	P78527	0	2787.46	High	5.85	L
FALSE	High	EQQEAIEHIDEVQNEIDR		1	2	4	Q01105	0	2195.02	High	5.85	E
FALSE	High	YWSQQIEESTTVVTTQSAEVGAAETTLTELR		1	1	4	P05783	0	3428.67	High	5.85	Y
FALSE	High	QTTVSNSQQAYQEAFEISK		1	1	4	P31946	0	2159.03	High	5.84	Q
FALSE	High	LGGSPTSLGTWGSWIGPDHDK		1	1	1	P14314	0	2168.04	High	5.84	L
FALSE	High	ESPLSLYNEELVSMNVQGDYEPTDATGFININSLR		1	1	10	P00966	0	3915.86	High	5.83	E
FALSE	High	TQDQDENVALEACEFWLTLAEQPICK	2xCarbamidomethyl [C13; C25]	1	1	4	Q92973	0	3108.43	High	5.83	T
FALSE	High	TSRPENAIIYNNNEDFQVGQAK		1	1	4	P29401	0	2508.21	High	5.82	T
FALSE	High	VLHEAEGHIVTCETNTGEVYR	1xCarbamidomethyl [C12]	1	1	1	P62318	0	2414.14	High	5.81	V
FALSE	High	NPVNYFAEVEQIAFDPSNMPPGIEASPDK		1	1	1	P04040	0	3176.49	High	5.81	N
FALSE	High	FWEVISDEHGIDPTGTYHGDSDLQLDR		1	1	10	P07437	0	3102.41	High	5.8	F
FALSE	High	QATVGDINTERPGMLDFTGK		1	1	1	P07108	0	2150.05	High	5.8	Q
FALSE	High	SGDAPLTVNELGTAYVSATTGAVATALGLNALTK		1	1	3	Q9H9B4	0	3247.71	High	5.79	S
FALSE	High	HPHDIIDDINSGAVECPAS	1xCarbamidomethyl [C16]	1	1	5	P30050	0	2046.92	High	5.78	H
FALSE	High	WGDAGAEYVVESTGVFTTMEK		1	1	46	P04406	0	2277.04	High	5.78	W
FALSE	High	YFAGNLASGGAAGATSLCFVYPLDFAR	1xCarbamidomethyl [C18]	1	2	9	P12236	0	2796.35	High	5.77	Y
FALSE	High	NEEDAAELVALAQAVNAR		1	1	6	P22314	0	1883.95	High	5.77	N
FALSE	High	TQTSDPAMLPTMIGLLAEAGVR		1	1	13	O43175	0	2272.17	High	5.77	T
FALSE	High	VSGQGLHEGHTFEPAEFIIDTR		1	1	4	P21333	0	2440.19	High	5.77	V
FALSE	High	MHDLNTDQENLVGTHDAPIR		1	1	1	O43684	0	2276.07	High	5.77	M
FALSE	High	GLIDGVVEADLVEALQEFGPISYVVVMPK		1	1	1	P14866	0	3087.63	High	5.77	G
FALSE	High	FDGALNVDLTEFQTNLVPYPR		3	7	27	Q71U36; Q9BQE3; P68366	0	2409.21	High	5.76	F
FALSE	High	LQAALDDEEAGGRPAMEPGNGSLDLGGDSAGR		1	1	2	Q00839	0	3126.44	High	5.76	L
FALSE	High	QAHLCVLASNCDEPMYVK	2xCarbamidomethyl [C5; C11]	1	1	2	P25398	0	2134.97	High	5.75	Q
FALSE	High	LVGQGASAVLLDLPNSGGEAQAK		1	1	4	Q99714	0	2195.17	High	5.75	L
FALSE	High	APKPEDIDEEDDDVPDLVENFDEASK		1	1	1	Q96K17	0	2931.29	High	5.74	A
FALSE	High	DDQVTVIGAGVTLHEALAAAELLK		1	1	4	P29401	0	2434.32	High	5.74	D
FALSE	High	ADLLLSTQPGREEGSPLELER		1	1	3	P08195	1	2310.19	High	5.74	A
FALSE	High	ISSIQSIVPALEIANAHR		1	1	23	P10809	0	1919.07	High	5.74	I
FALSE	High	VGETAPPNAYTVTDLVEYSIVIQQLSNGK		1	1	2	P39656	0	3106.59	High	5.74	V
FALSE	High	GFGDGYNGYGGGPGGGNFGGSPGYGGGR		1	1	2	P22626	0	2495.04	High	5.74	G
FALSE	High	YCVQLSQIQGLIGSVEEQLAQLR	1xCarbamidomethyl [C2]	1	1	8	Q04695	0	2632.38	High	5.73	Y
FALSE	High	NMDPLNDNIATLLHQSSDK		1	1	2	P35579	0	2126.02	High	5.73	N
FALSE	High	GTEWVDPEDPTVIAENELLGAAAAIEAAAK		1	1	4	Q9Y490	0	3051.52	High	5.72	G
FALSE	High	SAGVQCFGPTAEAAQLESSK	1xCarbamidomethyl [C6]	1	1	2	P22102	0	2037.95	High	5.72	S
FALSE	High	HEAFESDLAAHQDR		2	4	2	P12814; O43707	0	1625.73	High	5.71	H
FALSE	High	NTNDANSCQIIIPQNQVNR	1xCarbamidomethyl [C8]	2	2	3	P31150; P50395	0	2199.06	High	5.71	N
FALSE	High	GVEITGFPEAQALGLEVFHAGTALK		1	1	6	P22102	0	2555.35	High	5.71	G
FALSE	High	LPESENLQEFWDNLIGGVDMVTDDDRR		1	1	2	P49327	1	3163.46	High	5.71	L
FALSE	High	IFCCHGGLSPDLQSMEQIR	2xCarbamidomethyl [C3; C4]	2	3	1	P62136; P62140	0	2248.03	High	5.71	I
FALSE	High	GQILTMANPIIGNGGAPDTTALDELGLSK		1	1	2	P31327	0	2867.48	High	5.71	G
FALSE	High	GLVEPVDVVDNADGTQTVNYVPSR		1	1	3	P21333	0	2544.26	High	5.71	G
FALSE	High	FQSSAVMALQEASEAYLVGLFEDTNLCAIHAK	1xCarbamidomethyl [C27]; 1xOxidation [M7]	1	1	11	Q71DI3	0	3529.7	High	5.71	F
FALSE	High	FVHLLDQSDQDFQEELDLMK		1	1	2	P46940	0	2450.15	High	5.71	F
FALSE	High	DKDDDGGEDDDANCNLICGDEYGPETR	2xCarbamidomethyl [C14; C18]	1	1	1	Q08211	1	3045.16	High	5.7	D
FALSE	High	VADILTQLLQTDDSAEFNLVNNALLSIFK		1	1	1	Q9BZZ5	0	3205.7	High	5.7	V
FALSE	High	RPTPQDSPIFLPVDDTSFR		1	1	1	P49327	0	2188.1	High	5.7	R
FALSE	High	AQGPAASAEEPKPVEAPAANSDQTVTVK		1	1	3	P80723	0	2763.38	High	5.7	A
FALSE	High	LPIDVTEGEVISLGLPFGK		1	1	13	P26599	0	1984.1	High	5.7	L
FALSE	High	NLEALALDLMEPEQAVDLTLPK		1	1	11	P12956	0	2423.27	High	5.69	N
FALSE	High	HLEGLSEEAIMELNLPTGIPIVYELDK		1	1	9	P18669	0	3023.56	High	5.69	H
FALSE	High	GEMMDLQHGSLFLQTPK		1	1	5	P07195	0	1931.94	High	5.69	G
FALSE	High	VSPETVDSVIMGNVLQSSSDAIYLAR		1	1	6	P42765	0	2751.39	High	5.69	V
FALSE	High	QVLGQMVIDEELLGDGHSYSPR		1	1	2	P28070	0	2443.19	High	5.68	Q
FALSE	High	LEGLTDEFEELEFLSTINVGLTSIANLPK		1	1	3	P39687	0	3192.66	High	5.68	L
FALSE	High	APLATGEDDDDEVPDLVENFDEASK		1	1	3	P20290	0	2691.18	High	5.68	A
FALSE	High	AGKPVICATQMLESMIK	1xCarbamidomethyl [C7]	1	1	14	P14618	0	1876.97	High	5.68	A
FALSE	High	TNISDEESEQATEMLVHNAQNLMQSVK		1	1	2	P18206	0	3046.41	High	5.68	T
FALSE	High	EFVEEFIWPAIQSSALYEDR		1	1	12	P00966	0	2429.17	High	5.67	E
FALSE	High	HSQAVEELAEQLEQTK		1	1	2	P35579	0	1839.91	High	5.67	H
FALSE	High	ICDQISDAVLDAHLQQDPDAK	1xCarbamidomethyl [C2]	1	1	2	P31153	0	2352.11	High	5.66	I
FALSE	High	LAGANPAVITCDELLLGHEK	1xCarbamidomethyl [C11]	1	1	2	P78527	0	2121.1	High	5.66	L
FALSE	High	IPVTDEEQTNVPYIYAIGDILEDK		1	1	6	Q16881	0	2735.37	High	5.66	I
FALSE	High	TGVHHYSGNNIELGTACGK	1xCarbamidomethyl [C17]	1	1	5	P62888	0	2014.94	High	5.65	T
FALSE	High	FPEELTQTFMSCNLITGMFQR	1xCarbamidomethyl [C12]	1	1	13	P26641	0	2550.18	High	5.65	F
FALSE	High	NRPTSISWDGLDSGK		1	1	4	P30086	0	1632.8	High	5.64	N
FALSE	High	HLLSLMGIPYLDAPSEAEASCAALVK	1xCarbamidomethyl [C21]	1	1	6	P39748	0	2756.4	High	5.64	H
FALSE	High	ASGATILSTLANLEGEETFEAAMLGQAEEVVQER		1	1	10	P17987	0	3564.74	High	5.63	A
FALSE	High	THIQDNHDGTYTVAYVPDVTGR		1	1	3	P21333	0	2459.16	High	5.63	T
FALSE	High	EISFDTMQQELQIGADDVEAFVIDAVR		1	1	1	Q7L2H7	0	3039.46	High	5.62	E
FALSE	High	MIQTPDADLDVTNIIQADEPTTLTTNALDLNSVLGK		1	1	3	Q13155	0	3840.94	High	5.62	M
FALSE	High	TDAPQPDVKEEEEEKEEEK		1	1	2	P27824	2	2259.01	High	5.62	T
FALSE	High	RGFEVVYMTEPIDEYCVQQLK	1xCarbamidomethyl [C16]	1	1	1	P08238	1	2604.25	High	5.61	R
FALSE	High	YPALTKPENQDIDWTLLEGETR		1	1	1	P13797	0	2589.28	High	5.61	Y
FALSE	High	YASICQQNGIVPIVEPEILPDGDHDLK	1xCarbamidomethyl [C5]	2	2	15	P04075; P09972	0	3020.5	High	5.61	Y
FALSE	High	AQTEGINISEEALNHLGEIGTK		1	1	1	Q9Y265	0	2324.17	High	5.6	A
FALSE	High	DLSAAGIGLLAAATQSLSMPASLGR		1	1	6	P43243	0	2371.26	High	5.6	D
FALSE	High	MSVQPTVSLGGFEITPPVVLR		1	1	36	P06748	0	2227.22	High	5.59	M
FALSE	High	SNTGGQAFPQCVFDHWQILPGDPFDNSSRPSQVVAETR	1xCarbamidomethyl [C11]	1	1	17	P13639	0	4244.98	High	5.59	S
FALSE	High	VTSVVFHPSQDLVFSASPDATIR		1	1	1	Q9UMS4	0	2473.27	High	5.59	V
FALSE	High	EGSGIGAIDSNLDWSHNFTNMLGYTDHQFTELTR		1	1	3	O75390	0	3826.74	High	5.59	E
FALSE	High	SGPPGEEAQVASQFIADVIENSQIIQK		1	1	1	Q96B26	0	2855.44	High	5.58	S
FALSE	High	ERPTPSLNNNCTTSEDSLVLYNR	1xCarbamidomethyl [C11]	1	1	1	P07814	0	2680.26	High	5.58	E
FALSE	High	VTIAQGGVLPNIQAVLLPK		2	10	60	Q16777; Q7L7L0	0	1931.17	High	5.58	V
FALSE	High	QVVIDGETCLLDILDTAGQEEYSAMR	1xCarbamidomethyl [C9]	1	3	1	P01116	0	2926.38	High	5.57	Q
FALSE	High	VVETDPSPYCIVAPDTVIHCEGEPIK	2xCarbamidomethyl [C10; C20]	1	1	2	P55072	0	2925.4	High	5.57	V
FALSE	High	VPADTEVVCAPPTAYIDFAR	1xCarbamidomethyl [C9]	1	1	6	P60174	0	2192.07	High	5.57	V
FALSE	High	TTHFVEGGDAGNREDQINR		1	1	5	P18124	1	2115.98	High	5.57	T
FALSE	High	SMEAEMIQLQEELAAAER		1	1	3	P35579	0	2048.96	High	5.57	S
FALSE	High	ALDLFSDNAPPPELLEIINEDIAK		1	1	13	Q15084	0	2637.37	High	5.56	A
FALSE	High	HTGCCGDNDPIDVCEIGSK	3xCarbamidomethyl [C4; C5; C14]	1	1	3	Q15181	0	2133.86	High	5.56	H
FALSE	High	TGQATVASGIPAGWMGLDCGPESSKK	1xCarbamidomethyl [C19]	1	1	2	P00558	1	2605.24	High	5.56	T
FALSE	High	EIYCPAPPQIDNGIIQGER	1xCarbamidomethyl [C4]	1	1	6	P08174	0	2170.06	High	5.56	E
FALSE	High	FNDEHIPESPYLVPVIAPSDDAR		1	1	3	O75369	0	2581.26	High	5.55	F
FALSE	High	DQEVNFQEYVTFLGALALIYNEALK		1	1	2	P06703	0	2888.47	High	5.55	D
FALSE	High	TVPPAVTGITFLSGGQSEEEASINLNAINK		1	1	23	P04075	0	3057.57	High	5.55	T
FALSE	High	IPVIENLGATLDQFDAIDFSDNEIR		1	1	3	P09661	0	2805.39	High	5.55	I
FALSE	High	ILQEYVEHQVDDAMMANAAQK		1	1	2	P08243	0	2404.13	High	5.55	I
FALSE	High	RPWITGDESIVGLMK		1	1	1	Q16719	0	1701.9	High	5.55	R
FALSE	High	TVLMNPNIASVQTNEVGLK		1	1	4	P31327	0	2028.08	High	5.55	T
FALSE	High	NVLLDPQLVPGGGASEMAVAHALTEK		1	1	2	P49368	0	2617.37	High	5.54	N
FALSE	High	VSLDVNHFAPDELTVK		1	1	3	P04792	0	1783.92	High	5.54	V
FALSE	High	QTSGGPVDASSEYQQELER		1	1	1	P18859	0	2080.94	High	5.53	Q
FALSE	High	TPALIVYGDQDPMGQTSFEHLK		1	1	1	Q96IU4	0	2447.19	High	5.53	T
FALSE	High	ELPTEPPYTAYVGNLPFNTVQGDIDAIFK		1	1	5	Q15056	0	3209.6	High	5.53	E
FALSE	High	TDDEVVQREEEAIQLDGLNASQIR		1	1	1	P14625	1	2728.34	High	5.53	T
FALSE	High	KPVVDCVVSVPCFYTDAER	2xCarbamidomethyl [C6; C12]	1	1	1	P34932	0	2241.07	High	5.53	K
FALSE	High	QEDKDDLDVTELTNEDLLDQLVK		2	2	1	P42167; P42166	1	2688.31	High	5.53	Q
FALSE	High	ILQMEEEYIQQLCEDIIQLKPDVVITEK	1xCarbamidomethyl [C13]	1	1	6	P49368	0	3417.75	High	5.53	I
FALSE	High	NAIDDGCVVPGAGAVEVAMAEALIK	1xCarbamidomethyl [C7]	1	1	10	P40227	0	2470.23	High	5.53	N
FALSE	High	EAATLEVERPLPMEVEK		1	1	3	P51858	0	1941	High	5.52	E
FALSE	High	MDPLSELQDDLTLDDTSEALNQLK	1xAcetyl [N-Term]	1	1	5	Q07960	0	2746.3	High	5.52	M
FALSE	High	DELILEGNDIELVSNSAALIQQATTVK		1	1	9	P32969	0	2884.51	High	5.52	D
FALSE	High	SGDAAIVDMVPGKPMCVESFSDYPPLGR	1xCarbamidomethyl [C16]	1	2	14	P68104	0	2995.4	High	5.52	S
FALSE	High	LGVNNISGIEEVNMFTNQGTVIHFNNPK		1	1	2	P20290	0	3086.54	High	5.52	L
FALSE	High	LASGETVAAFCLTEPSSGSDAASIR	1xCarbamidomethyl [C11]	1	1	2	P49748	0	2497.19	High	5.52	L
FALSE	High	EQYEQILAFVQGTVAEGAPIIPISAQLK		1	2	7	P41091	0	3013.62	High	5.52	E
FALSE	High	GLQAQIASSGLTVEVDAPK		1	1	4	P05783	0	1884.01	High	5.52	G
FALSE	High	VQDDEVGDGTTSVTVLAAELLR		1	1	4	P78371	0	2288.16	High	5.52	V
FALSE	High	FNEEHIPDSPFVVPVASPSGDAR		1	1	3	P21333	0	2467.19	High	5.51	F
FALSE	High	LEQQVPVNQVFGQDEMIDVIGVTK		1	1	13	P39023	0	2686.38	High	5.51	L
FALSE	High	SGPFGQIFRPDNFVFGQSGAGNNWAK		2	5	3	P07437; P68371	0	2798.34	High	5.51	S
FALSE	High	LNSNTQVVLLSATMPSDVLEVTK		1	1	11	P60842	0	2459.31	High	5.51	L
FALSE	High	EENVGLHQTLDQTLNELNCI	1xCarbamidomethyl [C19]	1	1	3	P67936	0	2340.11	High	5.51	E
FALSE	High	SVGGLVAQQQCVGPLQTPLADVAVVALSHEELIGAATALGEQPVK	1xCarbamidomethyl [C11]	1	1	3	O15067	0	4521.4	High	5.51	S
FALSE	High	NQDLAPNSAEQASILSLVTK		1	1	2	Q12905	0	2099.1	High	5.51	N
FALSE	High	AAAASAAEAGIATTGTEDSDDALLK		1	1	1	P55036	0	2320.12	High	5.51	A
FALSE	High	TGQATVASGIPAGWMGLDCGPESSK	1xCarbamidomethyl [C19]	1	1	7	P00558	0	2477.14	High	5.5	T
FALSE	High	LNEDMACSVAGITSDANVLTNELR	1xCarbamidomethyl [C7]	1	1	3	P25789	0	2593.22	High	5.5	L
FALSE	High	QAVLGAGLPISTPCTTINK	1xCarbamidomethyl [C14]	1	1	1	P24752	0	1941.05	High	5.5	Q
FALSE	High	MNPAAEAEFNILLATDSYK	1xAcetyl [N-Term]	1	1	4	P43490	0	2140.03	High	5.5	M
FALSE	High	DDEFTHLYTLIVRPDNTYEVK		1	1	4	P27797	0	2568.26	High	5.49	D
FALSE	High	LDNYDAPDIANIAISNELFEEAFAIFR		1	1	1	Q00610	0	3071.5	High	5.49	L
FALSE	High	AAEQILEDMITIDVENVMEDICSK	1xCarbamidomethyl [C22]	1	1	1	Q12769	0	2766.29	High	5.48	A
FALSE	High	EGILNDDIYCPPETAVLLASYAVQSK	1xCarbamidomethyl [C10]	1	1	14	P26038	0	2866.42	High	5.48	E
FALSE	High	QFIDSNPNQPLVILEMESGASAK		1	1	1	P49588	0	2488.24	High	5.47	Q
FALSE	High	LGGGMPGLGQGPPTDAPAVDTAEQVYISSLALLK		1	1	4	O00487	0	3323.72	High	5.47	L
FALSE	High	FVVDLSDQVAPTDIEEGMR		1	1	2	P35998	0	2121.02	High	5.47	F
FALSE	High	YVEPIEDVPCGNIVGLVGVDQFLVK	1xCarbamidomethyl [C10]	1	1	15	P13639	0	2759.43	High	5.46	Y
FALSE	High	CELLYEGPPDDEAAMGIK	1xCarbamidomethyl [C1]	1	1	8	P13639	0	2007.9	High	5.46	C
FALSE	High	FSFSGNTLVSSSADPEGHFETPIWIER		1	1	3	Q14697	0	3010.42	High	5.46	F
FALSE	High	AQDPSEVLTMLTNETGFEISSSDATVK		1	1	6	Q12905	0	2870.36	High	5.46	A
FALSE	High	EIVHIQAGQCGNQIGAK	1xCarbamidomethyl [C10]	2	6	12	P07437; P68371	0	1822.92	High	5.46	E
FALSE	High	APEQEQAAPGPAAGGEAPK		1	1	4	P80723	0	1775.86	High	5.45	A
FALSE	High	GHYTEGAELVDSVLDVVR		2	5	25	P07437; P68371	0	1958.98	High	5.45	G
FALSE	High	GQHEVHGMPSANTHNTWK		1	1	1	Q9HCN8	0	2030.92	High	5.45	G
FALSE	High	AGAAPYVQAFDSLLAGPVAEYLK		1	1	4	Q01518	0	2351.23	High	5.45	A
FALSE	High	EVDPLVYNMSHEDPGNVSYSEIGGLSEQIR		1	1	1	P62333	0	3334.55	High	5.45	E
FALSE	High	IVKPNGEKPDEFESGISQALLELEMNSDLK		1	1	3	P62081	0	3330.68	High	5.45	I
FALSE	High	TISSSLAVVDLIDAIQPGCINYDLVK	1xCarbamidomethyl [C19]	1	1	3	P13797	0	2804.48	High	5.45	T
FALSE	High	YDGSTIVPGEQGAEYQHFIQQCTDDVR	1xCarbamidomethyl [C22]	1	1	2	Q14019	0	3113.39	High	5.45	Y
FALSE	High	VEYTPYEEGLHSVDVTYDGSPVPSSPFQVPVTEGCDPSR	1xCarbamidomethyl [C35]	1	1	3	P21333	0	4296.96	High	5.45	V
FALSE	High	HNEETGDNVGPLIIK		1	1	1	Q9NZ45	0	1635.83	High	5.44	H
FALSE	High	FGGQLLSFDIGDQPVFEIPLSNVSQCTTGK	1xCarbamidomethyl [C26]	1	1	4	Q08945	0	3254.6	High	5.44	F
FALSE	High	MDVLAEANGTFALNLLK	1xAcetyl [N-Term]	1	1	4	P35237	0	1861.97	High	5.44	M
FALSE	High	VEEQEPELTSTPNFVVEVIK		1	1	6	Q07021	0	2287.17	High	5.44	V
FALSE	High	TDADSESDNSDNNTIFVQGLGEGVSTDQVGEFFK		1	1	1	Q92804	0	3622.59	High	5.44	T
FALSE	High	GPAVGIDLGTTYSCVGVFQHGK	1xCarbamidomethyl [C14]	1	1	2	P11142	0	2263.12	High	5.44	G
FALSE	High	ELQSQISDTSVVLSMDNSR		1	1	6	P05787	0	2109.01	High	5.44	E
FALSE	High	SEEAHAEDSVMDHHFR		1	1	3	Q8NC51	0	1896.79	High	5.44	S
FALSE	High	QLTEMLPSILNQLGADSLTSLR		1	1	10	P20290	0	2400.28	High	5.43	Q
FALSE	High	DQFPEVYVPTVFENYVADIEVDGK		1	1	8	P61586	0	2773.32	High	5.43	D
FALSE	High	VVMALGDYMGASCHACIGGTNVR	2xCarbamidomethyl [C13; C16]	1	1	1	P60842	0	2439.1	High	5.43	V
FALSE	High	CAPGVVGPAEADIDFDIIR	1xCarbamidomethyl [C1]	1	1	3	P21333	0	2014.99	High	5.43	C
FALSE	High	YTPSGQAGAAASESLFVSNHAY		1	1	3	P04075	0	2228.03	High	5.43	Y
FALSE	High	GILEESPSEAEDFISGITQTMVEAVAEVEK		1	1	1	Q14966	0	3208.55	High	5.43	G
FALSE	High	TLTAVHDAILEDLVFPSEIVGK		1	1	18	P62081	0	2367.28	High	5.42	T
FALSE	High	LMEPIYLVEIQCPEQVVGGIYGVLNR	1xCarbamidomethyl [C12]	1	1	6	P13639	0	2989.55	High	5.42	L
FALSE	High	VPFCPMVGSEVYSTEIK	1xCarbamidomethyl [C4]	1	1	2	Q9Y265	0	1942.93	High	5.42	V
FALSE	High	IITITGTQDQIQNAQYLLQNSVK		1	1	13	P61978	0	2589.39	High	5.42	I
FALSE	High	VPPAINQFTQALDR		1	1	7	P62424	0	1569.84	High	5.42	V
FALSE	High	VLELPYQGEELSMVILLPDDIEDESTGLK		1	1	2	P30740	0	3245.64	High	5.42	V
FALSE	High	KPVVNIITPSHVEER		1	1	2	Q16719	0	1717.96	High	5.41	K
FALSE	High	VTYHPDGPEGQAYDVDFTPPFR		1	1	1	Q15046	0	2508.15	High	5.41	V
FALSE	High	AGTQIENIDEDFRDGLK		1	1	1	O43707	1	1920.93	High	5.41	A
FALSE	High	EELQSGVDAANSAAQQYQR		1	1	2	P46940	0	2064.96	High	5.41	E
FALSE	High	ICALDDNVCMAFAGLTADAR	2xCarbamidomethyl [C2; C9]	1	1	2	O14818	0	2183.99	High	5.41	I
FALSE	High	VEGDTCSLNEFTITGSTYAPIGEVHK	1xCarbamidomethyl [C6]	1	1	1	P16615	0	2825.33	High	5.41	V
FALSE	High	AENNSEVGASGYGVPGPTWDR		1	1	1	Q08211	0	2162.97	High	5.41	A
FALSE	High	IEAELQDICNDVLELLDK	1xCarbamidomethyl [C9]	1	1	12	P31946	0	2130.06	High	5.41	I
FALSE	High	YAPTEAQLNAVDALIDSMSLAK		1	1	13	P13010	0	2321.17	High	5.4	Y
FALSE	High	IEWLESHQDADIEDFK		1	1	5	P11021	0	1974.91	High	5.4	I
FALSE	High	IREDLPNLESSEETEQINK		1	1	1	Q96QK1	1	2244.1	High	5.4	I
FALSE	High	DPTVHDDVLELEMDELNR		1	1	1	P78527	0	2139.99	High	5.4	D
FALSE	High	YHTSQSGDEMTSLSEYVSR		1	1	5	P08238	0	2176.95	High	5.4	Y
FALSE	High	SNMGHPEPASGLAALAK		1	1	1	P49327	0	1650.83	High	5.4	S
FALSE	High	EEIVQFFSGLEIVPNGITLPVDFQGR		1	1	3	P31943	0	2904.51	High	5.4	E
FALSE	High	KGVNLPGAAVDLPAVSEK		1	1	4	P14618	1	1764.99	High	5.39	K
FALSE	High	TNCNVAVINVGAPAAGMNAAVR	1xCarbamidomethyl [C3]	1	1	1	Q01813	0	2170.09	High	5.39	T
FALSE	High	EAEVVLCGGTESMSQAPYCVR	2xCarbamidomethyl [C7; C19]	1	1	1	P42765	0	2343.04	High	5.39	E
FALSE	High	EALDHMVEYVAQNTPVTWLVGPFAPGITEK		1	1	8	O60664	0	3312.66	High	5.38	E
FALSE	High	GEETPVIVGSALCALEGRDPELGLK	1xCarbamidomethyl [C13]	1	1	1	P49411	1	2610.34	High	5.37	G
FALSE	High	AFAGDIANQLATDAVQILGGNGFNTEYPVEK		1	1	3	P11310	0	3223.59	High	5.37	A
FALSE	High	IMQSSSEVGYDAMAGDFVNMVEK		1	1	11	P10809	0	2508.11	High	5.37	I
FALSE	High	LAELEEFINGPNNAHIQQVGDR		1	1	2	Q00610	0	2464.22	High	5.37	L
FALSE	High	AIGNIVTGTDEQTQVVIDAGALAVFPSLLTNPK		1	1	2	P52292	0	3352.8	High	5.37	A
FALSE	High	NQALNTDNYGHDLASVQALQR		1	1	1	Q13813	0	2328.13	High	5.37	N
FALSE	High	LEGVLAEVAQHYQDTLIR		1	1	1	P46940	0	2055.09	High	5.36	L
FALSE	High	REEEEFNTGPLSVLTQSVK		1	1	2	P62316	1	2163.09	High	5.36	R
FALSE	High	ECISIHVGQAGVQIGNACWELYCLEHGIQPDGQMPSDK	3xCarbamidomethyl [C2; C18; C23]	2	5	1	Q71U36; Q9BQE3	0	4296.96	High	5.36	E
FALSE	High	VSHVSTGGGASLELLEGK		1	2	6	P00558	0	1740.91	High	5.36	V
FALSE	High	MDALQLANSAFAVDLFK	1xAcetyl [N-Term]	1	1	11	P36952	0	1895.96	High	5.36	M
FALSE	High	ESTGAQVQVAGDMLPNSTER		2	3	5	Q15366; Q15365	0	2089.98	High	5.36	E
FALSE	High	ALESPERPFLAILGGAK		1	1	25	P00558	0	1769	High	5.36	A
FALSE	High	LGQSDPAPLQHQMDIYQK		1	1	5	P29401	0	2069.01	High	5.35	L
FALSE	High	EEIVQFFSGLEIVPNGITLPVDPEGK		1	1	4	P52597	0	2827.48	High	5.35	E
FALSE	High	IAIPGLAGAGNSVLLVSNLNPER		1	1	7	P26599	0	2275.28	High	5.34	I
FALSE	High	FDENDVITCFANFESDEVELSYAK	1xCarbamidomethyl [C9]	1	1	12	Q00839	0	2842.24	High	5.34	F
FALSE	High	AGSNMLLIGVHGPTTPCEEVSMK	1xCarbamidomethyl [C17]	1	1	2	O75369	0	2428.17	High	5.34	A
FALSE	High	ALLELQLEPEELYQTFQR		1	1	19	P13639	0	2220.15	High	5.34	A
FALSE	High	ALEAFDLDPAQWGVNVQPYSGSPANLAVYTALLQPHDR		1	1	4	P34897	0	4124.05	High	5.34	A
FALSE	High	ITAQSIEELCAVNLYGPDAQVDR	1xCarbamidomethyl [C10]	1	1	1	P78527	0	2562.25	High	5.34	I
FALSE	High	QTNLENLDQAFSVAER		1	1	1	Q15149	0	1834.89	High	5.33	Q
FALSE	High	FACNGTVIEHPEYGEVIQLQGDQR	1xCarbamidomethyl [C3]	1	2	1	P41567	0	2760.3	High	5.33	F
FALSE	High	LPAELQELPGLSHQYWSAPSDK		1	1	2	P27695	0	2466.23	High	5.33	L
FALSE	High	RFDEILEASDGIMVAR		1	1	5	P14618	1	1821.92	High	5.33	R
FALSE	High	GDVAEGDLIEHFSQFGTVEK		1	1	2	Q13151	0	2178.03	High	5.33	G
FALSE	High	LYQSAGGMPGGMPGGFPGGGAPPSGGASSGPTIEEVD		1	1	6	P11142	0	3346.5	High	5.33	L
FALSE	High	GFTDADNTWEPEENLDCPELIEAFLNSQK	1xCarbamidomethyl [C17]	1	1	5	Q13185	0	3382.51	High	5.33	G
FALSE	High	THTQDAVPLTLGQEFSGYVQQVK		1	1	1	P07954	0	2546.29	High	5.33	T
FALSE	High	QNQVGVVPWSPPQSNWNPWTSSNIDEGPLAFATPEQISMDLK		1	1	3	Q08211	0	4665.24	High	5.32	Q
FALSE	High	QTIDNSQGAYQEAFDISK		1	1	4	P27348	0	2014.94	High	5.32	Q
FALSE	High	ALSVGNIDDALQCYSEAIK	1xCarbamidomethyl [C13]	1	1	9	P31948	0	2067.01	High	5.32	A
FALSE	High	LTTPTYGDLNHLVSATMSGVTTCLR	1xCarbamidomethyl [C23]	2	5	21	P07437; P68371	0	2708.34	High	5.31	L
FALSE	High	ALMLQGVDLLADAVAVTMGPK		1	1	17	P10809	0	2113.14	High	5.31	A
FALSE	High	IGGVQQDTILAEGLHFR		1	1	2	Q99623	0	1853.99	High	5.31	I
FALSE	High	KAEEIANEMIEAAK		1	1	1	P49588	1	1546.78	High	5.3	K
FALSE	High	AQFAQPEILIGTIPGAGGTQR		1	1	3	P30084	0	2125.14	High	5.3	A
FALSE	High	AVTLHDQGTAQWADLSSQFYLR		1	1	1	P22314	0	2507.23	High	5.3	A
FALSE	High	GFGYAEFEDLDSLLSALSLNEESLGNR		1	1	3	P23588	0	2946.4	High	5.3	G
FALSE	High	FQEHLQLQNLGINPANIGFSTLTMESDK		1	1	1	Q00610	0	3145.56	High	5.3	F
FALSE	High	VPSTEAEALASSLMGLFEK		1	1	13	P50395	0	1980	High	5.3	V
FALSE	High	QTQTFTTYSDNQPGVLIQVYEGER		1	1	5	P11142	0	2774.33	High	5.3	Q
FALSE	High	KPPLLNNADSVQAK		1	1	3	P09874	0	1494.83	High	5.3	K
FALSE	High	YGGPPPDSVYSGQQPSVGTEIFVGK		1	1	3	O60506	0	2566.25	High	5.29	Y
FALSE	High	GGAAVDPDSGLEHSAHVLEK		1	1	2	P09874	0	1988.97	High	5.29	G
FALSE	High	VGAGAPVYLAAVLEYLTAEILELAGNAAR		1	10	2	Q7L7L0	0	2915.59	High	5.29	V
FALSE	High	VHSPSGAVEECHVSELEPDK	1xCarbamidomethyl [C11]	1	1	4	O75369	0	2206.01	High	5.29	V
FALSE	High	YKPAVNQIECHPYLTQEK	1xCarbamidomethyl [C10]	1	1	1	P15121	0	2218.1	High	5.28	Y
FALSE	High	HSTGIDIGDSLTIPDEFTEDEK		1	1	1	Q6NUK1	0	2419.11	High	5.28	H
FALSE	High	KPLPDHVSIVEPK		1	1	4	P23396	0	1458.83	High	5.28	K
FALSE	High	ERVEAVNMAEGIIHDTETK		1	1	1	P38646	1	2142.05	High	5.28	E
FALSE	High	SVVPGGGAVEAALSIYLENYATSMGSR		1	1	3	P17987	0	2699.33	High	5.28	S
FALSE	High	HLYTLDGGDIINALCFSPNR	1xCarbamidomethyl [C15]	1	1	3	P63244	0	2276.11	High	5.27	H
FALSE	High	DLSHIGDAVVISCAK	1xCarbamidomethyl [C13]	1	1	4	P12004	0	1584.81	High	5.27	D
FALSE	High	SRDNGPDGMEPEGVIESNWNEIVDSFDDMNLSESLLR		1	1	7	P60842	1	4166.86	High	5.27	S
FALSE	High	ELLNPVVEFVSHPSTTCR	1xCarbamidomethyl [C17]	1	1	2	P78527	0	2085.04	High	5.27	E
FALSE	High	MNEEYDVIVLGTGLTECILSGIMSVNGK	1xAcetyl [N-Term]; 1xCarbamidomethyl [C17]	1	1	2	P50395	0	3084.49	High	5.27	M
FALSE	High	AGTQIENIEEDFRDGLK		1	1	1	P12814	1	1934.95	High	5.27	A
FALSE	High	MREDYDSVEQDGDEPGPQR		1	1	1	Q9Y5S9	1	2222.93	High	5.26	M
FALSE	High	NALVSHLDGTTPVCEDIGR	1xCarbamidomethyl [C14]	1	1	1	P31930	0	2054	High	5.26	N
FALSE	High	GQVGGEINVEMDAAPGVDLSR		1	1	2	Q04695	0	2114.02	High	5.26	G
FALSE	High	DLISDSNPMVVANAVAALSEIAESHPSSNLLDLNPQSINK		1	1	2	Q10567	0	4174.1	High	5.25	D
FALSE	High	AASADSTTEGTPADGFTVLSTK		1	1	3	O75367	0	2127.01	High	5.25	A
FALSE	High	MAAISESNINLCGSHCGVSIGEDGPSQMALEDLAMFR	2xCarbamidomethyl [C12; C16]	1	1	13	P29401	0	3967.78	High	5.25	M
FALSE	High	DGELPVEDDIDLSDVELDDLGKDEL		1	1	3	Q15084	1	2758.27	High	5.25	D
FALSE	High	GIVDQSQQAYQEAFEISK		1	1	7	P63104	0	2040.99	High	5.24	G
FALSE	High	LVARPEPATGYTLEFR		1	1	1	Q16658	0	1819.97	High	5.24	L
FALSE	High	GDVEEDETIPDSEQDIRPR		1	1	1	Q92973	0	2200	High	5.24	G
FALSE	High	IHVSDQELQSANASVDDSRLEELK		1	1	1	P22314	1	2683.32	High	5.23	I
FALSE	High	LFDHPESPTPNPTEPLFLAQAEVYK		1	1	1	P49327	0	2840.41	High	5.23	L
FALSE	High	AKPSPAPPSTTTAPDASGPQK		1	1	1	P40855	0	2006.02	High	5.23	A
FALSE	High	TLSTIATSTDAASVVHSTDLVVEAIVENLK		1	1	9	Q16836	0	3084.63	High	5.22	T
FALSE	High	SNLFEDATSALVTGQSYENMVTEIMSMGYER		1	1	3	P54727	0	3473.55	High	5.22	S
FALSE	High	VQHQDALQISDVVMASLLR		1	1	1	Q14974	0	2123.13	High	5.22	V
FALSE	High	FTASAGIQVVGDDLTVTNPK		1	1	16	P06733	0	2033.05	High	5.22	F
FALSE	High	HGLLVPNNTTDQELQHIR		1	1	2	P56537	0	2085.08	High	5.22	H
FALSE	High	VYNVTQHAVGIVVNK		1	1	3	P46778	0	1640.91	High	5.22	V
FALSE	High	LEGDSTDLSDQIAELQAQIAELK		1	1	7	P35579	0	2487.25	High	5.21	L
FALSE	High	LALADAGDTVEDANFVEAMADAGILR		1	1	4	Q9P2J5	0	2648.29	High	5.21	L
FALSE	High	TTPDPSANISLDGVDVPLGTGISSGVNDTSLLYNEYIVYDIAQVNLK		1	1	3	P09874	0	4938.48	High	5.21	T
FALSE	High	EAIVTSEELGQDLEHVEVLQK		1	1	1	Q13813	0	2366.21	High	5.21	E
FALSE	High	SINPDEAVAYGAAVQAAILMGDK		1	2	19	P0DMV9	0	2304.15	High	5.21	S
FALSE	High	IDQIEDLQDQLEDMMEDANEIQEALSR		1	1	1	Q9NZZ3	0	3191.44	High	5.21	I
FALSE	High	MQQNIQELEEQLEEEESAR		1	1	2	P35579	0	2333.06	High	5.2	M
FALSE	High	ELEAVCQDVLSLLDNYLIK	1xCarbamidomethyl [C6]	1	1	10	P61981	0	2235.16	High	5.2	E
FALSE	High	EVEAVIPDHCIFASNTSALPISEIAAVSK	1xCarbamidomethyl [C10]	1	1	2	P40939	0	3068.56	High	5.2	E
FALSE	High	DLIADSNPMVVANAVAALSEISESHPNSNLLDLNPQNINK		1	1	3	P63010	0	4228.12	High	5.2	D
FALSE	High	EAILNDEIYCPPETAVLLASYAVQAK	1xCarbamidomethyl [C10]	1	1	2	P35241	0	2878.45	High	5.2	E
FALSE	High	HLEINPDHPIVETLR		1	1	10	P08238	0	1782.95	High	5.2	H
FALSE	High	AQELGHSQSALASAQR		1	1	1	Q14980	0	1653.83	High	5.2	A
FALSE	High	QILLGIQELLNEPNIQDPAQAEAYTIYCQNR	1xCarbamidomethyl [C28]	1	1	4	P63279	0	3615.81	High	5.2	Q
FALSE	High	LVSPGSANETSSILVESVTR		1	1	4	O75369	0	2046.07	High	5.19	L
FALSE	High	EGTDSSQGIPQLVSNISACQVIAEAVR	1xCarbamidomethyl [C19]	1	1	2	Q99832	0	2829.4	High	5.19	E
FALSE	High	YLSQEEAQAVDQELFNEYQFSVDQLMELAGLSCATAIAK	1xCarbamidomethyl [C33]	1	1	1	Q8NCW5	0	4410.08	High	5.19	Y
FALSE	High	QLQQAQAAGAEQEVEK		1	1	3	P39748	0	1727.86	High	5.19	Q
FALSE	High	QQLSAEELDAQLDAYNAR		1	1	4	Q86V81	0	2034.97	High	5.19	Q
FALSE	High	GDTANEIGQVLHFENVK		1	1	4	P36952	0	1870.93	High	5.18	G
FALSE	High	GWTGQESLSDSDPEMWELLQR		1	1	1	P34897	0	2464.11	High	5.18	G
FALSE	High	TREEECHFYAGGQVYPGEASR	1xCarbamidomethyl [C6]	1	1	1	Q13162	1	2443.07	High	5.18	T
FALSE	High	RDAEDAMDAMDGAVLDGR		1	1	1	Q01130	1	1907.82	High	5.18	R
FALSE	High	RGPEVTSQGVQTSSPACK	1xCarbamidomethyl [C17]	1	1	1	Q99700	1	1888.92	High	5.18	R
FALSE	High	KPEDWDEEMDGEWEPPVIQNPEYK		1	1	4	P27797	0	2960.29	High	5.18	K
FALSE	High	AVSDASAGDYGSAIETLVTAISLIK		1	1	7	Q16630	0	2452.28	High	5.18	A
FALSE	High	LFQVSTLDAALSGTLSGVEGFTSQEDQEMLSR		1	1	4	P33992	0	3416.65	High	5.18	L
FALSE	High	ICELLPEAAINDVYLAPLLQCLIEGLSAEPR	2xCarbamidomethyl [C2; C21]	1	1	1	Q14974	0	3480.81	High	5.18	I
FALSE	High	SGTIFDNFLITNDEAYAEEFGNETWGVTK		1	1	8	P27797	0	3268.5	High	5.17	S
FALSE	High	DGTTHQTSLELFMYLNEVAGK		1	1	3	P00966	0	2354.13	High	5.17	D
FALSE	High	SSILLDVKPWDDETDMAQLEACVR	1xCarbamidomethyl [C22]	1	1	7	P29692	0	2791.33	High	5.17	S
FALSE	High	TDEFQLHTNVNDGTEFGGSIYQK		1	1	1	P21796	0	2600.19	High	5.16	T
FALSE	High	ETVVEVPQVTWEDIGGLEDVKR		1	1	2	P55072	1	2498.28	High	5.16	E
FALSE	High	KHEAFESDLAAHQDR		2	3	4	P12814; O43707	1	1753.83	High	5.16	K
FALSE	High	VVVVDDLLATGGTMNAACELLGR	1xCarbamidomethyl [C18]	1	1	1	P07741	0	2374.21	High	5.16	V
FALSE	High	EFDYVINDLTAVPISTSPEEDSTWEFLR		1	1	3	P52788	0	3273.55	High	5.16	E
FALSE	High	IRDEMVATEQER		1	1	2	P16615	1	1476.71	High	5.16	I
FALSE	High	NIDNPALADIYTEHAHQVVVAK		1	1	1	O75083	0	2418.24	High	5.16	N
FALSE	High	VEDMAELTCLNEASVLHNLK	1xCarbamidomethyl [C9]	1	2	2	P35579	0	2286.11	High	5.16	V
FALSE	High	VGSAADIPINISETDLSLLTATVVPPSGR		1	1	6	P21333	0	2893.55	High	5.15	V
FALSE	High	SSEHINEGETAMLVCK	1xCarbamidomethyl [C15]	1	1	3	P35613	0	1804.82	High	5.15	S
FALSE	High	HYEAVHDAGNDSGHGGESNLALK		1	1	1	Q15075	0	2378.08	High	5.15	H
FALSE	High	ATESGAQSAPLPMEGVDISPK		1	1	1	Q02790	0	2085.02	High	5.15	A
FALSE	High	HLEINPDHSIIETLR		1	1	8	P07900	0	1786.94	High	5.15	H
FALSE	High	IVSLFAEHNDLQYAAPGGLIGVGTK		1	2	1	P41091	0	2570.36	High	5.15	I
FALSE	High	APVQPQQSPAAAPGGTDEKPSGK		1	1	1	Q13200	0	2218.11	High	5.15	A
FALSE	High	VDVSAPDVEAHGPEWNLK		1	1	1	Q09666	0	1962.96	High	5.15	V
FALSE	High	ECPSDECGAGVFMASHFDR	2xCarbamidomethyl [C2; C7]	1	1	4	P62979	0	2171.86	High	5.15	E
FALSE	High	GYEDYLQSPLQPLMDNLESQTYEVFEK		1	1	4	O14744	0	3236.5	High	5.14	G
FALSE	High	CIQMWFDPAQGNPNEEVAR	1xCarbamidomethyl [C1]	1	1	4	P15328	0	2262.01	High	5.14	C
FALSE	High	ALINADELASDVAGAEALLDR		1	1	6	Q13813	0	2127.09	High	5.14	A
FALSE	High	EILVGDVGQTVDDPYATFVK		1	1	27	P23528	0	2166.1	High	5.13	E
FALSE	High	LGQHVVGMAPLSVGSLDDEPGGEAETK		1	1	1	P43897	0	2693.31	High	5.13	L
FALSE	High	GPQLFHMDPSGTFVQCDAR	1xCarbamidomethyl [C16]	1	1	2	P28066	0	2162.97	High	5.13	G
FALSE	High	LFAQLAGDDMEVSATELMNILNK		1	1	5	P04632	0	2523.25	High	5.13	L
FALSE	High	VENQENVSNLVIEDTELK		1	1	3	Q01518	0	2073.03	High	5.13	V
FALSE	High	GNDISSGTVLSDYVGSGPPK		1	1	4	P30086	0	1949.95	High	5.13	G
FALSE	High	VNNSTMLGASGDYADFQYLK		1	1	3	P28070	0	2194.01	High	5.13	V
FALSE	High	TVLLSIQALLSAPNPDDPLANDVAEQWK		1	1	3	P61088	0	3018.58	High	5.13	T
FALSE	High	SPFVVQVGEACNPNACR	2xCarbamidomethyl [C11; C16]	1	1	3	O75369	0	1904.87	High	5.12	S
FALSE	High	AEISELPSIVQDLANGNITWADVEAR		1	1	5	P41250	0	2811.42	High	5.12	A
FALSE	High	GQELAFPLSPDWQVDYESYTWR		1	1	4	P26641	0	2687.24	High	5.12	G
FALSE	High	NVGCLQEALQLATSFAQLR	1xCarbamidomethyl [C4]	1	1	5	P49588	0	2119.1	High	5.12	N
FALSE	High	FNAHGDANTIVCNSK	1xCarbamidomethyl [C12]	1	1	3	P09382	0	1647.75	High	5.12	F
FALSE	High	LGEIVTTIPTIGFNVETVEYK		2	4	17	P61204; P18085	0	2323.24	High	5.12	L
FALSE	High	VEAPSLDVHMDSPDINIEGPDVK		1	1	1	Q09666	0	2477.19	High	5.11	V
FALSE	High	AAAAAAAAAPAAAATAPTTAATTAATAAQ		1	1	2	P37108	0	2368.21	High	5.11	A
FALSE	High	LTESPCALVASQYGWSGNMER	1xCarbamidomethyl [C6]	1	1	4	P14625	0	2356.07	High	5.11	L
FALSE	High	IYDDDFFQNLDGVANALDNVDAR		1	1	14	P22314	0	2600.19	High	5.11	I
FALSE	High	DLLLTSSYLSDSGSTGEHTK		1	1	3	P08195	0	2111.01	High	5.11	D
FALSE	High	TAFDEAIAELDTLNEESYK		1	1	14	P31946	0	2159	High	5.11	T
FALSE	High	AAVPSGASTGIYEALELR		1	3	49	P06733	0	1804.94	High	5.11	A
FALSE	High	DYPVVSIEDPFDQDDWGAWQK		1	1	25	P06733	0	2510.11	High	5.11	D
FALSE	High	EEETEAAIGAPPTATEGPETKPVLMALAEGPGAEGPR		1	1	2	Q13263	0	3673.79	High	5.11	E
FALSE	High	ILGQEGDASYLASEISTWDGVIVTPSEK		1	1	1	Q12905	0	2965.47	High	5.1	I
FALSE	High	LGDAVEQGVINNTVLGYFIGR		1	1	2	P41250	0	2235.18	High	5.1	L
FALSE	High	NQAFIEMNTEEAANTMVNYYTSVTPVLR		1	1	9	P26599	0	3206.51	High	5.1	N
FALSE	High	YAVDDVPFSIPAASEIADLSNIINK		1	1	3	Q9GZL7	0	2662.36	High	5.1	Y
FALSE	High	GHVDILAPTVQELAALEK		1	1	1	Q92499	0	1904.05	High	5.1	G
FALSE	High	NLPQYVSNELLEEAFSVFGQVER		1	1	10	Q15233	0	2668.33	High	5.1	N
FALSE	High	KPGMFFNPEESELDLTYGNR		1	1	1	P11413	0	2344.09	High	5.1	K
FALSE	High	DGPLNMILDDGGDLTNLIHTK		1	1	10	P23526	0	2252.12	High	5.09	D
FALSE	High	DPEAPIFQVADYGIVADLFK		1	1	9	P13804	0	2208.12	High	5.09	D
FALSE	High	NMITGTAPLDGCILVVAANDGPMPQTR	1xCarbamidomethyl [C12]	1	1	2	P49411	0	2812.38	High	5.09	N
FALSE	High	LIVDEAINEDNSVVSLSQPK		1	1	4	P55072	0	2170.12	High	5.09	L
FALSE	High	LLEGDGGPNTGGMGAYCPAPQVSNDLLLK	1xCarbamidomethyl [C17]	1	1	1	P22102	0	2944.42	High	5.08	L
FALSE	High	EVEEISLLQPQVEESVLNLGK		1	1	1	O00567	0	2353.25	High	5.08	E
FALSE	High	NPWSMDENLMHISYEAGILENPK		1	1	7	P00966	0	2688.24	High	5.08	N
FALSE	High	ALGLGVEQLPVVFEDVVLHQATILPK		1	1	6	P49327	0	2785.59	High	5.08	A
FALSE	High	SYDVPPPPMEPDHPFYSNISK		1	2	5	P18669	0	2417.11	High	5.08	S
FALSE	High	WNTDNTLGTEIAIEDQICQGLK	1xCarbamidomethyl [C18]	1	1	6	P45880	0	2519.21	High	5.07	W
FALSE	High	MQDLDEDATLTQLATAWVSLATGGEK		1	1	8	O14579	0	2764.33	High	5.07	M
FALSE	High	NVDLLSDMVQEHDEPILK		1	1	4	P55209	0	2095.04	High	5.07	N
FALSE	High	NPVWYQALTHGLNEEQR		1	1	1	O95373	0	2055	High	5.07	N
FALSE	High	NPSTVEAFDLAQSNSEHSR		1	1	1	O15067	0	2088.96	High	5.07	N
FALSE	High	VLDNYLTSPLPEEVDETSAEDEGVSQR		1	1	4	O00299	0	2992.39	High	5.07	V
FALSE	High	GEVPCTVTSASPLEEATLSELK	1xCarbamidomethyl [C5]	1	1	4	P48047	0	2318.14	High	5.07	G
FALSE	High	HSQDLAFLSMLNDIAAVPATAMPFR		1	1	3	P49327	0	2716.36	High	5.07	H
FALSE	High	IVSRPEELREDDVGTGAGLLEIK		1	1	3	P49368	1	2496.33	High	5.06	I
FALSE	High	QAWFIENEEQEYVQTVK		1	1	3	P04083	0	2141.02	High	5.06	Q
FALSE	High	EGILSDEIYCPPETAVLLGSYAVQAK	1xCarbamidomethyl [C10]	1	1	7	P15311	0	2823.41	High	5.06	E
FALSE	High	IPEINSSDMSAHVTSPSGR		1	1	2	O75369	0	1984.94	High	5.06	I
FALSE	High	AEQPDGLILGMGGQTALNCGVELFK	1xCarbamidomethyl [C19]	1	1	7	P31327	0	2618.3	High	5.06	A
FALSE	High	TVASPGVTVEEAVEQIDIGGVTLLR		1	1	3	P31939	0	2553.38	High	5.06	T
FALSE	High	STAISLFYELSENDLNFIK		1	1	13	P13639	0	2204.11	High	5.06	S
FALSE	High	VADSSPFALELLISDDCFVLDNGLCGK	2xCarbamidomethyl [C17; C25]	1	1	2	P40121	0	2955.41	High	5.05	V
FALSE	High	SLQDIIAILGMDELSEEDK		1	1	11	P06576	0	2119.05	High	5.05	S
FALSE	High	VIEINPYLLGTMAGGAADCSFWER	1xCarbamidomethyl [C19]	1	1	3	P28074	0	2670.27	High	5.05	V
FALSE	High	EDIDAAIETYNLLSER		1	1	2	P23921	0	1851.9	High	5.05	E
FALSE	High	TAFDEAIAELDTLNEDSYK		1	1	17	P27348	0	2144.99	High	5.05	T
FALSE	High	LDEYLNSPLPDEIDENSMEDIK		1	1	2	Q9Y696	0	2579.17	High	5.05	L
FALSE	High	VGINYQPPTVVPGGDLAK		3	7	12	Q71U36; Q9BQE3; P68366	0	1824.99	High	5.04	V
FALSE	High	GFEVVYMTEPIDEYCVQQLK	1xCarbamidomethyl [C15]	1	1	7	P08238	0	2448.15	High	5.04	G
FALSE	High	FNVGEDCPVFDGLFEFCQLSTGGSVAGAVK	2xCarbamidomethyl [C7; C17]	1	1	2	Q92769	0	3207.48	High	5.04	F
FALSE	High	MATEVAADALGEEWK		1	1	4	P62753	0	1620.76	High	5.04	M
FALSE	High	NLNEDTTFLPFTLQELGGLPEDFLNSLEK		1	1	1	P52888	0	3294.64	High	5.03	N
FALSE	High	EESQQMVLDIEDLDNIQTPESVLLSAVSGEDTQDR		1	1	5	Q14152	0	3903.83	High	5.03	E
FALSE	High	YLLQYQEPIPCEQLVTALCDIK	2xCarbamidomethyl [C11; C19]	1	1	7	P25789	0	2694.35	High	5.03	Y
FALSE	High	RMATEVAADALGEEWK		1	1	1	P62753	1	1776.86	High	5.03	R
FALSE	High	MEGDAVEAIVEESETFIK	1xAcetyl [N-Term]	1	1	2	P49711	0	2038.95	High	5.03	M
FALSE	High	KLDEAVAEAHLGK		1	1	3	P23526	1	1380.75	High	5.03	K
FALSE	High	QLSSSVTGLTNIEEENCQR	1xCarbamidomethyl [C17]	1	1	2	P46940	0	2165.01	High	5.03	Q
FALSE	High	FGVEQDVDMVFASFIR		1	1	15	P14618	0	1859.9	High	5.03	F
FALSE	High	ITLPVDFVTADKFDENAK		1	1	1	P00558	1	2023.04	High	5.03	I
FALSE	High	FITHAPPGEFNEVFNDVR		1	1	2	P52907	0	2089.01	High	5.03	F
FALSE	High	GSITSVQAIYVPADDLTDPAPATTFAHLDATTVLSR		1	1	6	P06576	0	3714.89	High	5.03	G
FALSE	High	FVSSSSSGAYGGGYGGVLTASDGLLAGNEK		1	1	1	P08727	0	2808.33	High	5.03	F
FALSE	High	TVLGTPEVLLGALPGAGGTQR		1	1	1	P40939	0	2007.12	High	5.03	T
FALSE	High	QYASLTGTQALPPLFSLGYHQSR		1	1	1	Q14697	0	2535.3	High	5.02	Q
FALSE	High	CLAFHDISPQAPTHFLVIPK	1xCarbamidomethyl [C1]	1	1	10	P49773	0	2291.2	High	5.02	C
FALSE	High	VETELQGVCDTVLGLLDSHLIK	1xCarbamidomethyl [C9]	1	1	9	P31947	0	2439.28	High	5.02	V
FALSE	High	VTASGPGLSSYGVPASLPVDFAIDAR		1	1	6	O75369	0	2547.31	High	5.02	V
FALSE	High	SHFEQWGTLTDCVVMR	1xCarbamidomethyl [C12]	1	2	2	P09651	0	1965.89	High	5.02	S
FALSE	High	NQQITHANNTVSNFK		1	1	2	Q92598	0	1715.85	High	5.02	N
FALSE	High	TELEDTLDSTAAQQELR		1	1	2	P35579	0	1919.92	High	5.02	T
FALSE	High	VIISAPSADAPMFVMGVNHEK		1	1	27	P04406	0	2213.11	High	5.01	V
FALSE	High	ETGANLAICQWGFDDEANHLLLQNNLPAVR	1xCarbamidomethyl [C9]	1	1	3	P48643	0	3379.65	High	5.01	E
FALSE	High	GAEVHLVPWNHDFTK		1	1	2	P31327	0	1749.87	High	5.01	G
FALSE	High	SAGQGEVLVYVEDPAGHQEEAK		1	1	2	P21333	0	2313.1	High	5.01	S
FALSE	High	HIFSEDTSDFSGMSETK		1	1	3	P36952	0	1917.82	High	5	H
FALSE	High	NELMYQLEQDHDLQAILQER		1	1	1	Q08211	0	2486.2	High	5	N
FALSE	High	VQGGALEDSQLVAGVAFK		1	1	1	Q99832	0	1788.95	High	5	V
FALSE	High	GCNIENACYPLGICAER	3xCarbamidomethyl [C2; C8; C14]	1	1	1	P32320	0	1996.87	High	5	G
FALSE	High	CPEALFQPSFLGMESCGIHETTFNSIMK	2xCarbamidomethyl [C1; C16]; 1xOxidation [M]	1	2	23	P60709	0	3247.46	High	5	C
FALSE	High	ASDSPIDLFYGDFFGDISEAVIQK		1	1	4	Q9Y2T3	0	2634.26	High	5	A
FALSE	High	DAGEGLLAVQITDQEGKPK		1	1	2	O75369	0	1969.02	High	5	D
FALSE	High	TLAQAMLNNAQPDQYEAPDK		1	1	1	Q92973	0	2218.04	High	5	T
FALSE	High	SPQPPVEEEDEHFDDTVVCLDTYNCDLHFK	2xCarbamidomethyl [C19; C25]	1	1	2	Q00839	0	3635.56	High	5	S
FALSE	High	GYQLSDVDGVTCEDIDECALPTGGHICSYR	3xCarbamidomethyl [C12; C18; C27]	1	1	1	P23142	0	3387.46	High	5	G
FALSE	High	REDEEESLNEVGYDDIGGCR	1xCarbamidomethyl [C19]	1	1	1	P55072	1	2341.98	High	4.99	R
FALSE	High	NNEDISIIPPLFTVSVDHR		1	1	3	P51571	0	2166.12	High	4.99	N
FALSE	High	YGAVDPLLALLAVPDMSSLACGYLR	1xCarbamidomethyl [C21]	1	1	3	P52292	0	2665.37	High	4.99	Y
FALSE	High	LGGLTQAPGNPVLAVQINQDK		1	1	1	P26368	0	2133.17	High	4.98	L
FALSE	High	HSLNSSSASTTEPDFQK		1	1	2	P42704	0	1835.84	High	4.98	H
FALSE	High	CELSSSVQTDINLPYLTMDSSGPK	1xCarbamidomethyl [C1]	1	1	2	P38646	0	2642.23	High	4.98	C
FALSE	High	VILGSEAAQQHPEEVR		1	1	1	Q9NY33	0	1762.91	High	4.98	V
FALSE	High	LAEEEDLFDSAHPEEGDLDLASESTAHAQSSK		1	2	1	Q15424	0	3428.52	High	4.98	L
FALSE	High	MELSDANLQTLTEYLK	1xAcetyl [N-Term]	1	1	4	P55060	0	1910.94	High	4.98	M
FALSE	High	YLNAGAGGIAGAFIHEK		1	1	2	Q16719	0	1688.88	High	4.98	Y
FALSE	High	VEGTEPTTAFNLFVGNLNFNK		1	1	11	P19338	0	2312.16	High	4.98	V
FALSE	High	YNEDLELEDAIHTAILTLK		1	1	8	P25787	0	2201.13	High	4.97	Y
FALSE	High	AIVDALPPPCESACTVPTDVDK	2xCarbamidomethyl [C10; C14]	1	1	5	Q15181	0	2355.12	High	4.97	A
FALSE	High	LSLEGDHSTPPSAYGSVK		1	2	9	P07355	0	1844.9	High	4.97	L
FALSE	High	MAQLLDLSVDESEAFLSNLVVNK		1	1	2	O00232	0	2535.3	High	4.96	M
FALSE	High	TSIEDQDELSSLLQVPLVAGTVNR		1	1	6	P56537	0	2584.35	High	4.96	T
FALSE	High	LGIDDLVHFDFMDPPAPETLMR		1	1	3	O43143	0	2529.22	High	4.96	L
FALSE	High	IIYLNQLLQEDSLNVADLTSLR		1	1	4	Q9UL46	0	2531.37	High	4.95	I
FALSE	High	QEDVSVQLEALDIMADMLSR		1	1	3	Q86VP6	0	2263.09	High	4.95	Q
FALSE	High	RGFAFVTFDDHDSVDK		1	2	1	P09651	1	1855.86	High	4.95	R
FALSE	High	KYEDICPSTHNMDVPNIK	1xCarbamidomethyl [C6]	1	3	4	P63241	1	2161.01	High	4.95	K
FALSE	High	DENQSINHQMAQEDAQR		1	1	1	P20073	0	2013.87	High	4.95	D
FALSE	High	VGEVCHITCKPEYAYGSAGSPPK	2xCarbamidomethyl [C5; C9]	1	1	1	Q02790	0	2507.17	High	4.95	V
FALSE	High	IINEPTAAAIAYGLDK		2	4	11	P11142; P11021	0	1659.9	High	4.95	I
FALSE	High	VLNNMEIGTSLFDEEGAK		1	1	6	P00558	0	1966.94	High	4.94	V
FALSE	High	ETPEEVAADVLAEVITAAVR		1	1	1	O43823	0	2083.09	High	4.94	E
FALSE	High	QFASQANVVGPWIQTK		1	1	1	O43707	0	1773.93	High	4.94	Q
FALSE	High	IGPILDNSTLQSEVKPILEK		1	1	2	P30153	0	2194.23	High	4.94	I
FALSE	High	TTFDEAMADLHTLSEDSYK		1	1	2	P31947	0	2173.96	High	4.94	T
FALSE	High	KSDIDEIVLVGGSTR		1	1	3	P11021	1	1588.85	High	4.94	K
FALSE	High	TYFPHFDLSHGSAQVK		1	1	6	P69905	0	1833.89	High	4.94	T
FALSE	High	HEPLVLFCESCDTLTCR	3xCarbamidomethyl [C8; C11; C16]	1	1	2	Q13263	0	2136.95	High	4.94	H
FALSE	High	LAGTQPLEVLEAVQR		1	1	5	P22314	0	1623.91	High	4.94	L
FALSE	High	DLPTIPGVTSPSSDEPPMEASQSHLR		1	1	1	Q13541	0	2748.31	High	4.94	D
FALSE	High	HNQLPLVIEFTEQTAPK		1	1	3	P07237	0	1965.04	High	4.93	H
FALSE	High	NDFQLIGIQDGYLSLLQDSGEVR		1	1	12	P63241	0	2580.29	High	4.93	N
FALSE	High	TFVNITPAEVGVLVGK		1	1	23	P07737	0	1643.94	High	4.93	T
FALSE	High	MMCGAPSATQPATAETQHIADQVR	1xAcetyl [N-Term]; 1xCarbamidomethyl [C3]	1	1	4	P04080	0	2613.19	High	4.93	M
FALSE	High	DLYANTVLSGGTTMYPGIADR	1xOxidation [M14]	1	2	6	P60709	0	2231.06	High	4.93	D
FALSE	High	ETIELVHTEPTDVAQLPSR		1	1	1	Q6IBS0	0	2135.1	High	4.92	E
FALSE	High	VLSTLNVLVTPELLETGVECTASNDLGK	1xCarbamidomethyl [C20]	1	1	2	P43121	0	2972.55	High	4.92	V
FALSE	High	VNDGVCDCCDGTDEYNSGVICENTCK	5xCarbamidomethyl [C6; C8; C9; C21; C25]	1	1	3	P14314	0	3041.13	High	4.92	V
FALSE	High	NLSDLIDLVPSLCEDLLSSVDQPLK	1xCarbamidomethyl [C13]	1	1	4	P47756	0	2783.44	High	4.92	N
FALSE	High	TATALLESPLSATVEDALQSFLK		1	1	6	Q96TC7	0	2405.28	High	4.92	T
FALSE	High	SVVLMSHLGRPDGVPMPDK		1	1	5	P00558	0	2035.05	High	4.91	S
FALSE	High	FDTGNLCMVTGGANLGR	1xCarbamidomethyl [C7]	1	1	4	P62701	0	1782.83	High	4.91	F
FALSE	High	VINEPTAAALAYGLDK		1	1	5	P38646	0	1645.88	High	4.91	V
FALSE	High	DVPNETLQVEEDDRPELPWWK		1	1	2	O95373	0	2595.24	High	4.91	D
FALSE	High	VHNDAQSFDYDHDAFLGAEEAK		1	1	1	O43852	0	2479.08	High	4.91	V
FALSE	High	VYAAATEDMDCLTFGSPVLMR	1xCarbamidomethyl [C11]	1	1	2	P39748	0	2347.08	High	4.91	V
FALSE	High	GFQQILAGEYDHLPEQAFYMVGPIEEAVAK		1	1	9	P06576	0	3350.64	High	4.91	G
FALSE	High	NWADAQTQIQNIAASFDQEAAAILMAR		1	1	2	Q15436	0	2947.44	High	4.91	N
FALSE	High	SGSAADTQAVADAVTYQLGFHSIELNEPPLVHTAASLFK		1	1	3	P28072	0	4056.03	High	4.91	S
FALSE	High	EGGLGPLNIPLLADVTR		1	1	16	P32119	0	1734.97	High	4.91	E
FALSE	High	VNTFSALANIDLALEQGDALALFR		1	1	2	P46940	0	2562.36	High	4.91	V
FALSE	High	GGPPFAFVEFEDPRDAEDAVYGR		1	1	2	Q07955	1	2541.17	High	4.91	G
FALSE	High	QLSQSLLPAIVELAEDAK		1	2	5	P30153	0	1925.06	High	4.9	Q
FALSE	High	ITGEAFVQFASQELAEK		1	1	2	P52597	0	1867.94	High	4.9	I
FALSE	High	VMVDSLVEQEIQTSVATLDETEELPR		1	1	1	P57740	0	2931.45	High	4.9	V
FALSE	High	GAGTGGLGLTVEGPCEAK	1xCarbamidomethyl [C15]	1	2	2	O75369	0	1673.82	High	4.9	G
FALSE	High	MPPYDEQTQAFIDAAQEAR		1	1	6	P14314	0	2180.99	High	4.9	M
FALSE	High	VSDTVVEPYNATLSVHQLVENTDETYCIDNEALYDICFR	2xCarbamidomethyl [C27; C37]	2	5	16	P07437; P68371	0	4593.11	High	4.9	V
FALSE	High	AITVFSPDGHLFQVEYAQEAVK		1	2	2	O14818	0	2449.24	High	4.9	A
FALSE	High	MEYDGILIAGGPGNPALAEPLIQNVR		1	1	10	P31327	0	2708.41	High	4.9	M
FALSE	High	VGDAIPAVEVFEGEPGNK		1	1	6	P30044	0	1827.91	High	4.9	V
FALSE	High	AAFDDAIAELDTLSEESYK		1	1	22	P62258	0	2087.97	High	4.89	A
FALSE	High	RGFGFVTFDDHDPVDK		1	1	4	P22626	1	1851.87	High	4.89	R
FALSE	High	LAALNPESNTAGLDIFAK		1	1	5	O00299	0	1844.98	High	4.89	L
FALSE	High	EQLPPMSEDFLLDALSEDFSGPQNASSLK		1	1	4	P20810	0	3165.49	High	4.89	E
FALSE	High	THEAEIVEGENHTYCIR	1xCarbamidomethyl [C15]	1	1	2	P21333	0	2057.93	High	4.89	T
FALSE	High	TAFDDAIAELDTLNEDSYK		1	1	11	P61981	0	2130.97	High	4.89	T
FALSE	High	TDVCVFAAQEDLETMQAFAQVFNK	1xCarbamidomethyl [C4]	1	1	3	Q7L1Q6	0	2762.28	High	4.89	T
FALSE	High	WNTDNTLGTEITVEDQLAR		1	1	2	P21796	0	2176.05	High	4.89	W
FALSE	High	LEEDINSSMTNSTAASRPPVTLR		1	1	3	Q15365	0	2489.23	High	4.89	L
FALSE	High	VVSIGVPVSELLDDPSGPAGSLTSVEFCGGTHLR	1xCarbamidomethyl [C28]	1	1	4	P49588	0	3452.74	High	4.88	V
FALSE	High	HPDASVNFSEFSK		1	1	2	P09429	0	1464.68	High	4.88	H
FALSE	High	NLSPYVSNELLEEAFSQFGPIER		1	1	5	P23246	0	2639.3	High	4.88	N
FALSE	High	ITAFVPNDGCLNFIEENDEVLVAGFGR	1xCarbamidomethyl [C10]	1	1	6	P62266	0	2996.45	High	4.88	I
FALSE	High	AGAIAPCEVTVPAQNTGLGPEK	1xCarbamidomethyl [C7]	1	2	4	P05388	0	2180.1	High	4.88	A
FALSE	High	ASVHTLSGHTNAVATVR		1	1	2	O43660	0	1720.91	High	4.88	A
FALSE	High	GIEEEEILPGFILCDPNNLCHSGR	2xCarbamidomethyl [C14; C20]	1	1	2	P15170	0	2769.3	High	4.88	G
FALSE	High	VAHALAEGLGVIACIGEK	1xCarbamidomethyl [C14]	1	1	3	P60174	0	1807.97	High	4.88	V
FALSE	High	VDIDVPDVNVQGPDWHLK		1	1	1	Q09666	0	2046.03	High	4.88	V
FALSE	High	YIDSADLEPITSQEEPVR		1	1	1	P17812	0	2062	High	4.88	Y
FALSE	High	YGDGGSTFQSTTGHCVHMR	1xCarbamidomethyl [C15]	1	1	1	P31943	0	2097.89	High	4.88	Y
FALSE	High	IMDPNIVGSEHYDVAR		1	1	5	P06576	0	1815.87	High	4.88	I
FALSE	High	QLNSESLSQWTNPSTMANAK		1	1	3	P36952	0	2207.04	High	4.88	Q
FALSE	High	DELHIVEAEAMNYEGSPIK		1	1	19	P06748	0	2145.02	High	4.87	D
FALSE	High	EPPPEFEFIADPPSISAFDLDVVK		1	1	5	Q15459	0	2659.32	High	4.87	E
FALSE	High	GVDLDQLLDMSYEQLMQLYSAR		1	1	9	P62841	0	2588.24	High	4.87	G
FALSE	High	LDEEAENLVATVVPTHLAAAVPEVAVYLK		1	1	4	Q15257	0	3061.65	High	4.87	L
FALSE	High	MQVDQEEPHVEEQQQQTPAENK		1	1	2	P34932	0	2622.17	High	4.87	M
FALSE	High	VLECLASGIVMPDGSGIYDPCEK	2xCarbamidomethyl [C4; C21]	1	1	1	Q12906	0	2510.16	High	4.87	V
FALSE	High	FSGWYDADLSPAGHEEAK		1	1	5	P18669	0	1979.88	High	4.87	F
FALSE	High	EGPIDLGACNQDDWISAVRPVIEK	1xCarbamidomethyl [C9]	1	1	1	Q9Y5K5	0	2682.32	High	4.87	E
FALSE	High	IQIASESSGIPERPCVLTGTPESIEQAK	1xCarbamidomethyl [C15]	1	1	1	Q96I24	0	2997.52	High	4.87	I
FALSE	High	LASTLVHLGEYQAAVDGAR		1	1	2	Q00610	0	1971.03	High	4.87	L
FALSE	High	VFIMDSCDELIPEYLNFIR	1xCarbamidomethyl [C7]	1	1	10	P08238	0	2374.15	High	4.87	V
FALSE	High	SPLMSEFQSQISSNPELAAIFESIQK		1	1	4	Q86VP6	0	2881.43	High	4.87	S
FALSE	High	DNFWEMGDTGPCGPCSEIHYDR	2xCarbamidomethyl [C12; C15]	1	1	1	P49588	0	2643.03	High	4.87	D
FALSE	High	DTNYTLNTDSLDWALYDHLMDFLADR		1	1	3	Q07021	0	3118.41	High	4.87	D
FALSE	High	VNQIGSVTESIQACK	1xCarbamidomethyl [C14]	1	2	14	P06733	0	1633.82	High	4.87	V
FALSE	High	VIAINVDDPDAANYNDINDVK		1	1	4	Q15181	0	2288.1	High	4.87	V
FALSE	High	AGAISASGPELQGAGHSK		1	1	1	Q09666	0	1637.82	High	4.87	A
FALSE	High	LCSLLDSEDYNTCEGAFGALQK	2xCarbamidomethyl [C2; C13]	1	1	1	Q92973	0	2491.11	High	4.87	L
FALSE	High	CPNLTHLNLSGNK	1xCarbamidomethyl [C1]	1	1	4	P39687	0	1467.74	High	4.87	C
FALSE	High	YTPTQQGNMQVLVTYGGDPIPK		1	1	2	O75369	0	2407.2	High	4.86	Y
FALSE	High	QAAPCVLFFDELDSIAK	1xCarbamidomethyl [C5]	1	1	9	P55072	0	1923.95	High	4.86	Q
FALSE	High	LDEIYVAGLVAHSDLDER		1	1	2	O60506	0	2015.01	High	4.86	L
FALSE	High	TLVLSNLSYSATEETLQEVFEK		1	1	16	P19338	0	2501.27	High	4.86	T
FALSE	High	EGMAALQSDPWQQELYR		1	1	1	P49748	0	2021.94	High	4.86	E
FALSE	High	LEEDISSSMTNSTAASRPPVTLR		1	1	2	Q15366	0	2462.22	High	4.86	L
FALSE	High	NTSEQDQPMGGWEMIR		1	1	2	P20700	0	1878.81	High	4.86	N
FALSE	High	DPPVILYDEATSSLDSITEETILGAMK		1	1	4	O75027	0	2908.44	High	4.86	D
FALSE	High	NDQDTWDYTNPNLSGQGDPGSNPNK		1	1	2	P14866	0	2734.16	High	4.85	N
FALSE	High	QYDADLEQILIQWITTQCR	1xCarbamidomethyl [C18]	1	1	2	P37802	0	2394.18	High	4.85	Q
FALSE	High	QTQIFTTYSDNQPGVLIQVYEGER		1	2	3	P0DMV9	0	2786.36	High	4.85	Q
FALSE	High	SEDSTKDDIDLDALAAEIEGAGAAK		1	1	1	O60841	1	2505.18	High	4.85	S
FALSE	High	KMDLIDLEDETIDAEVMNSLAVTMDDFR		1	1	3	P55072	1	3229.49	High	4.85	K
FALSE	High	YMNSGPVVAMVWEGLNVVK		1	2	17	P22392	0	2093.06	High	4.85	Y
FALSE	High	SNDPQMVAENFVPPLLDAVLIDYQR		1	1	8	O14980	0	2844.42	High	4.85	S
FALSE	High	KQELEEICHDLEAR	1xCarbamidomethyl [C8]	1	1	1	P35579	1	1769.85	High	4.85	K
FALSE	High	AGQPHSSSDAAQAPAEQPHSSSDAAQAPCPR	1xCarbamidomethyl [C29]	1	1	1	P29372	0	3113.37	High	4.85	A
FALSE	High	VVQVSAGDSHTAALTDDGR		1	1	1	P18754	0	1898.92	High	4.85	V
FALSE	High	EYFGGFGEVESIELPMDNK		1	1	5	Q14103	0	2160.98	High	4.85	E
FALSE	High	TDTLQIEDFLEETLGPPDFPSLAPR		1	1	3	O95833	0	2801.39	High	4.85	T
FALSE	High	LPGGELNPGEDEVEGLK		1	1	2	O43809	0	1752.87	High	4.84	L
FALSE	High	MAEDEAETIGNLIEECGGLEK	1xCarbamidomethyl [C16]	1	1	1	O00629	0	2308.03	High	4.84	M
FALSE	High	TAAANAAAGAAENAFR		1	1	1	O14828	0	1476.72	High	4.84	T
FALSE	High	AAELIANSLATAGDGLIELR		1	1	2	P35232	0	1998.09	High	4.84	A
FALSE	High	ELESQISELQEDLESER		1	1	2	P35579	0	2033.95	High	4.84	E
FALSE	High	DNHLLGTFDLTGIPPAPR		1	1	19	P11021	0	1934.01	High	4.84	D
FALSE	High	SDLFQDDLYPDTAGPEAALEAEEWFEGK		1	1	4	Q9ULV4	0	3143.4	High	4.84	S
FALSE	High	LTQAQIFDYGEIPNFPR		1	1	2	P00491	0	2009.01	High	4.83	L
FALSE	High	ATPPQIVNGDQYCGDYELFVEAVEQNTLQEFLK	1xCarbamidomethyl [C13]	1	1	6	Q9H299	0	3815.81	High	4.83	A
FALSE	High	EEFASTCPDDEEIELAYEQVAK	1xCarbamidomethyl [C7]	1	1	5	O00299	0	2573.12	High	4.83	E
FALSE	High	SLQENEEEEIGNLELAWDMLDLAK		1	1	4	P49321	0	2789.32	High	4.83	S
FALSE	High	QVMVVPVGPTCDEYAQK	1xCarbamidomethyl [C11]	1	1	3	P26639	0	1920.92	High	4.83	Q
FALSE	High	EPDVLILDEPTNNLDIESIDALGEAINEYK		1	1	2	Q8NE71	0	3342.65	High	4.82	E
FALSE	High	NSNLVGAAHEELQQSR		1	1	5	P02545	0	1752.86	High	4.82	N
FALSE	High	RPSQEQSASASSGQPQAPLNR		1	1	1	Q5T1M5	0	2196.08	High	4.82	R
FALSE	High	ENTEGEYSGIEHVIVDGVVQSIK		1	1	2	P50213	0	2502.24	High	4.82	E
FALSE	High	QGAIVAVTGDGVNDSPALK		1	3	1	P05023	0	1811.95	High	4.81	Q
FALSE	High	DAFEHIVTQFSSVPVSVVSDSYDIYNACEK	1xCarbamidomethyl [C28]	1	1	2	P43490	0	3406.58	High	4.81	D
FALSE	High	KVESLQEEIAFLK		1	1	4	P08670	1	1533.85	High	4.81	K
FALSE	High	GEETPVIVGSALCALEGR	1xCarbamidomethyl [C13]	1	1	1	P49411	0	1857.94	High	4.81	G
FALSE	High	EFGAGPLFNQILPLLMSPTLEDQER		1	1	3	O75533	0	2815.43	High	4.81	E
FALSE	High	YGGPPPDSVYSGVQPGIGTEVFVGK		1	1	2	O43390	0	2507.25	High	4.81	Y
FALSE	High	TIGTGLVTNTLAMTEEEK		1	1	2	P49411	0	1907.96	High	4.81	T
FALSE	High	KEDGTFYEFGEDIPEAPER		1	1	1	O43776	1	2229	High	4.81	K
FALSE	High	CEMASTGEVACFGEGIHTAFLK	2xCarbamidomethyl [C1; C11]	1	1	2	P31327	0	2415.08	High	4.81	C
FALSE	High	IVAERPGTNSTGPAPMAPPR		1	1	2	Q13263	0	2019.04	High	4.81	I
FALSE	High	LGIYDADGDGDFDVDDAK		1	1	2	Q12797	0	1900.81	High	4.8	L
FALSE	High	APKPDGPGGGPGGSHMGGNYGDDR	1xOxidation [M16]	1	1	3	P35637	0	2268.97	High	4.8	A
FALSE	High	IPDPEAVKPDDWDEDAPAK		1	1	3	P27824	0	2107.98	High	4.8	I
FALSE	High	ICPVETLVEEAIQCAEK	2xCarbamidomethyl [C2; C14]	1	1	9	P30084	0	1988.97	High	4.8	I
FALSE	High	STNGDTFLGGEDFDQALLR		1	1	5	P38646	0	2055.96	High	4.8	S
FALSE	High	DKPHVNVGTIGHVDHGK		1	1	3	P49411	0	1809.94	High	4.8	D
FALSE	High	FVINYDYPNSSEDYIHR		1	1	1	P17844	0	2131.97	High	4.79	F
FALSE	High	TNVNGGAIALGHPLGGSGSR		1	1	1	P42765	0	1834.95	High	4.79	T
FALSE	High	DADDNCVTVCNMENVDAMGVHTGDSVVVAPAQTLSNAEFQMLR	2xCarbamidomethyl [C6; C10]	1	1	4	P31327	0	4681.07	High	4.79	D
FALSE	High	YALQMEQLNGILLHLESELAQTR		1	1	4	P05783	0	2670.39	High	4.79	Y
FALSE	High	SELHIENLNMEADPGQYR		1	1	3	P35613	0	2115.98	High	4.79	S
FALSE	High	EIVVTDYSDQNLQELEK		1	1	2	P40261	0	2022.99	High	4.78	E
FALSE	High	HYGPGWVSMANAGK		1	1	2	P23284	0	1474.69	High	4.78	H
FALSE	High	AAAPAPEEEMDECEQALAAEPK	1xCarbamidomethyl [C13]	1	1	4	P26641	0	2357.03	High	4.78	A
FALSE	High	HILLAVANDEELNQLLK		1	2	1	O75367	0	1933.08	High	4.78	H
FALSE	High	QVEPLDPPAGSAPGEHVFVK		1	1	2	P54577	0	2074.06	High	4.78	Q
FALSE	High	EALKDEYDDLSDLTAAQQETLSDWESQFTFK		1	1	3	O00264	1	3623.65	High	4.78	E
FALSE	High	GTEDITSPHGIPLDLLDR		1	1	3	Q9Y265	0	1949	High	4.77	G
FALSE	High	SVIEQGGIQTVDQLIK		1	1	1	Q8WUM4	0	1727.95	High	4.77	S
FALSE	High	RGPSEETGGAVFDHPAK		1	1	1	O60563	1	1754.85	High	4.77	R
FALSE	High	GAGTGGLGLAVEGPSEAK		1	1	3	P21333	0	1570.81	High	4.77	G
FALSE	High	TSVLAAANPIESQWNPK		1	1	1	P33991	0	1825.94	High	4.77	T
FALSE	High	GQGVYLGMPGCLPVYDALAGEFIR	1xCarbamidomethyl [C11]	1	1	8	P30040	0	2583.27	High	4.77	G
FALSE	High	DGTVLCELINALYPEGQAPVK	1xCarbamidomethyl [C6]	1	1	13	P37802	0	2287.16	High	4.77	D
FALSE	High	VHIPNDDAQFDASHCDSDK	1xCarbamidomethyl [C15]	1	1	2	Q16576	0	2170.91	High	4.77	V
FALSE	High	QGGDVLQNEEGETTSHLMGMFYR		1	1	2	P39748	0	2599.16	High	4.77	Q
FALSE	High	SEMESVLAQLDNYGQQELADLFVNYNVK		1	1	5	P41250	0	3217.54	High	4.77	S
FALSE	High	LHIIEVGTPPTGNQPFPK		1	1	2	Q00610	0	1945.05	High	4.76	L
FALSE	High	VGEVTYVELLMDAEGK		1	1	2	P52272	0	1752.87	High	4.76	V
FALSE	High	NDVLDSLGISPDLLPEDFVR		1	1	3	Q9UBE0	0	2214.13	High	4.76	N
FALSE	High	GVNLPGAAVDLPAVSEK		1	1	8	P14618	0	1636.89	High	4.76	G
FALSE	High	TYGADLASVDFQHASEDAR		1	1	1	P30740	0	2052.93	High	4.76	T
FALSE	High	VDIDVPDVDVQGPDWHLK		1	1	1	Q09666	0	2047.01	High	4.76	V
FALSE	High	KREDCSPADKPYIDEAR	1xCarbamidomethyl [C5]	1	1	1	Q96DG6	2	2049.97	High	4.76	K
FALSE	High	GPDGLTAFEATDNQAIK		1	1	2	P58546	0	1747.85	High	4.76	G
FALSE	High	IQEIIEQLDVTTSEYEK		1	1	4	P10809	0	2038.02	High	4.76	I
FALSE	High	LMSANASDLPLSIECFMNDVDVSGTMNR	1xCarbamidomethyl [C15]	1	1	3	P34932	0	3087.39	High	4.76	L
FALSE	High	ILATPPQEDAPSVDIANIR		1	1	8	P29401	0	2020.07	High	4.76	I
FALSE	High	AGAGSATLSMAYAGAR		1	1	1	P40926	0	1454.71	High	4.75	A
FALSE	High	ILTATVDNANILLQIDNAR		1	1	7	Q04695	0	2068.14	High	4.75	I
FALSE	High	GPSLDIDTPDVNIEGPEGK		1	1	1	Q09666	0	1952.94	High	4.75	G
FALSE	High	VYGSFLVNPESGYNVSLLYDLENLPASK		1	1	3	O15144	0	3088.55	High	4.75	V
FALSE	High	VCTLAIIDPGDSDIIR	1xCarbamidomethyl [C2]	1	1	6	P62888	0	1757.91	High	4.75	V
FALSE	High	GAEAANVTGPDGVPVEGSR		1	1	2	P16989	0	1782.86	High	4.75	G
FALSE	High	LMDLDVEQLGIPEQEYSCVVK	1xCarbamidomethyl [C18]	1	1	3	P12004	0	2465.19	High	4.75	L
FALSE	High	MDIDAPDVEVQGPDWHLK		1	1	1	Q09666	0	2064.97	High	4.75	M
FALSE	High	VDIDAPDVDVHGPDWHLK		1	1	3	Q09666	0	2027.98	High	4.74	V
FALSE	High	DQVTAQEIFQDNHEDGPTAK		1	1	2	P13010	0	2243.02	High	4.74	D
FALSE	High	HQALQAEIAGHEPR		1	1	1	Q13813	0	1556.79	High	4.74	H
FALSE	High	AVLSAEQLRDEEVHAGLGELLR		1	1	1	P50454	1	2405.28	High	4.74	A
FALSE	High	VLALSVETDYTFPLAEK		1	1	11	P05388	0	1896	High	4.74	V
FALSE	High	NLDIERPTYTNLNR		3	7	7	Q71U36; Q9BQE3; P68366	0	1718.88	High	4.74	N
FALSE	High	INEELESQYQQSMDSK		1	1	1	O00193	0	1928.85	High	4.74	I
FALSE	High	RGPCIIYNEDNGIIK	1xCarbamidomethyl [C4]	1	1	3	P36578	1	1761.9	High	4.74	R
FALSE	High	DPAEGDGAQPEETPR		1	1	1	Q14697	0	1568.68	High	4.74	D
FALSE	High	QITSYGETCPGLEQYAIK	1xCarbamidomethyl [C9]	1	1	2	P50990	0	2057.98	High	4.74	Q
FALSE	High	NREPVQLETLSIR		1	1	4	P62314	1	1554.86	High	4.73	N
FALSE	High	TPVEEVPAAIAPFQGR		1	1	2	Q15393	0	1681.89	High	4.73	T
FALSE	High	ATQQQHDFTLTQTADGR		1	1	2	P78527	0	1917.9	High	4.73	A
FALSE	High	FGAVWTGDNTAEWDHLK		1	1	2	Q14697	0	1946.9	High	4.73	F
FALSE	High	APSVATVGSICDLNLK	1xCarbamidomethyl [C11]	1	1	2	O75369	0	1644.86	High	4.73	A
FALSE	High	LGPGGLDPVEVYESLPEELQK		1	1	2	Q16543	0	2269.16	High	4.73	L
FALSE	High	IEIESFYEGEDFSETLTR		1	1	2	P11021	0	2164.99	High	4.73	I
FALSE	High	TEPTAQQNLALQLAEK		1	2	1	B5ME19	0	1754.93	High	4.73	T
FALSE	High	ISLGLPVGAVINCADNTGAK	1xCarbamidomethyl [C13]	1	1	11	P62829	0	1970.04	High	4.73	I
FALSE	High	MDPNCSCAAGDSCTCAGSCK	1xAcetyl [N-Term]; 5xCarbamidomethyl [C5; C7; C13; C15; C19]	1	1	2	P02795	0	2250.76	High	4.73	M
FALSE	High	NIDDGTSDRPYSHALVAGIDR		1	1	4	P61353	0	2272.1	High	4.72	N
FALSE	High	QTFDLADAQTVLALSECAVTLK	1xCarbamidomethyl [C17]	1	1	2	O43592	0	2394.22	High	4.72	Q
FALSE	High	AAVEEGIVLGGGCALLR	1xCarbamidomethyl [C13]	1	1	6	P10809	0	1684.91	High	4.72	A
FALSE	High	SLTPAVPVESKPDKPSGK		1	1	1	P20810	0	1837.01	High	4.72	S
FALSE	High	MGPLGLDHMASSIER		1	1	2	P52272	0	1613.78	High	4.72	M
FALSE	High	EALAQTVLAEVPTQLVSYFR		1	1	5	Q99829	0	2235.2	High	4.72	E
FALSE	High	HTGPNSPDTANDGFVR		2	2	5	P31943; P55795	0	1684.77	High	4.71	H
FALSE	High	IEGYEDQVLITEHGDLGNSR		1	1	1	P52907	0	2245.07	High	4.71	I
FALSE	High	MDIDVPDVEVQGPDWHLK		1	1	1	Q09666	0	2093	High	4.71	M
FALSE	High	GPFVEAEVPDVDLECPDAK	1xCarbamidomethyl [C15]	1	1	1	Q09666	0	2086.96	High	4.71	G
FALSE	High	GIEQAVQSHAVAEEEAR		1	1	1	Q16891	0	1823.89	High	4.7	G
FALSE	High	ATTAALLLEAQAATGFLVDPVR		1	1	1	Q15149	0	2228.23	High	4.7	A
FALSE	High	AEPPQCTSLAWSADGQTLFAGYTDNLVR	1xCarbamidomethyl [C6]	1	1	7	P63244	0	3068.44	High	4.7	A
FALSE	High	YGINTTDIFQTVDLWEGK		1	1	15	P37802	0	2100.03	High	4.7	Y
FALSE	High	TGTITTFEHAHNMR		1	1	3	P13639	0	1615.76	High	4.7	T
FALSE	High	GVAALTSDPAVQAIVLDTASDVLDK		1	1	2	Q9Y490	0	2469.31	High	4.7	G
FALSE	High	SQEQLAAELAEYTAK		1	1	2	P15311	0	1651.82	High	4.7	S
FALSE	High	VATAQDDITGDGTTSNVLIIGELLK		1	1	3	P40227	0	2544.34	High	4.7	V
FALSE	High	TAIAMGMAQALGPDTPFTAIAGSEIFSLEMSK		1	1	2	Q9Y230	0	3256.59	High	4.7	T
FALSE	High	APVAGTCYQAEWDDYVPK	1xCarbamidomethyl [C7]	1	1	5	P30086	0	2069.93	High	4.7	A
FALSE	High	GLGTDEESILTLLTSR		1	1	4	P08758	0	1704.9	High	4.7	G
FALSE	High	FDVFEDFISPTTAAQTLLFTACSK	1xCarbamidomethyl [C22]	1	1	3	O95373	0	2709.31	High	4.7	F
FALSE	High	TDITYPAGFMDVISIDK		1	1	14	P62701	0	1885.93	High	4.7	T
FALSE	High	LTESVDVLMPNVGEIVGGSMR		1	1	2	O43776	0	2203.11	High	4.7	L
FALSE	High	LGTDESCFNMILATR	1xCarbamidomethyl [C7]	1	1	1	P20073	0	1727.81	High	4.7	L
FALSE	High	TVDLQDAEEAVELVQYAYFK		1	1	3	P25205	0	2331.14	High	4.69	T
FALSE	High	RLAPEYEAAATR		1	1	2	P30101	1	1347.7	High	4.69	R
FALSE	High	LESEMEDAYHEHQANLLR		1	1	1	P23246	0	2185	High	4.69	L
FALSE	High	IIANALSSEPACLAEIEEDK	1xCarbamidomethyl [C12]	1	1	2	P78527	0	2173.07	High	4.69	I
FALSE	High	EVSDGIIAPGYEEEALTILSK		1	1	3	P31939	0	2234.14	High	4.69	E
FALSE	High	GAGTNEDALIEILTTR		1	1	2	P12429	0	1673.87	High	4.69	G
FALSE	High	DLGLPTEAYISVEEVHDDGTPTSK		1	1	1	P51665	0	2573.23	High	4.69	D
FALSE	High	AKPYEGSILEADCDILIPAASEK	1xCarbamidomethyl [C13]	1	1	1	P00367	0	2490.24	High	4.69	A
FALSE	High	SLHDALCVLAQTVK	1xCarbamidomethyl [C7]	1	1	1	P78371	0	1554.83	High	4.69	S
FALSE	High	VLYSNMLGEENTYLWR		1	1	1	Q00325	0	1987.96	High	4.69	V
FALSE	High	TQLEELEDELQATEDAK		1	3	2	P35579	0	1961.92	High	4.68	T
FALSE	High	GQVLNSDELQELYEGLR		1	1	1	O00764	0	1962.98	High	4.68	G
FALSE	High	SCSGVEFSTSGSSNTDTGK	1xCarbamidomethyl [C2]	1	1	1	P45880	0	1907.79	High	4.68	S
FALSE	High	YESSALPSGQLTSLSEYASR		1	1	1	Q12931	0	2146.03	High	4.68	Y
FALSE	High	DGLEDPLEDTGLVQQQLDQLSTIGR		1	1	1	Q9UIA9	0	2740.36	High	4.68	D
FALSE	High	FVDHVFDEQVIDSLTVK		1	1	1	P04843	0	1991.01	High	4.68	F
FALSE	High	STVLTPMFVETQASQGTLQTR		1	1	2	P78527	0	2295.16	High	4.68	S
FALSE	High	TGIEQGSDAGYLCESQK	1xCarbamidomethyl [C13]	1	1	1	P40939	0	1842.82	High	4.68	T
FALSE	High	MDELFPLIFPAEPAQASGPYVEIIEQPK	1xAcetyl [N-Term]	1	1	1	Q04206	0	3171.6	High	4.68	M
FALSE	High	DFSALESQLQDTQELLQEENR		1	1	5	P35579	0	2493.17	High	4.68	D
FALSE	High	EEDAASTLVTGSEYETMLTEIMSMGYER		1	1	1	P54725	0	3143.37	High	4.67	E
FALSE	High	NLLHVTDTGVGMTR		1	1	4	P14625	0	1513.78	High	4.67	N
FALSE	High	LVLEQVVTSIASVADTAEEK		1	1	5	O00410	0	2102.12	High	4.67	L
FALSE	High	TLSSSTQASLEIDSLFEGIDFYTSITR		1	1	7	P0DMV9	0	2981.46	High	4.67	T
FALSE	High	DPANFQYPAESVLAYK		1	1	2	P15559	0	1812.88	High	4.67	D
FALSE	High	LISLTDENALSGNEELTVK		1	1	1	P14625	0	2046.06	High	4.67	L
FALSE	High	VFQSSANYAENFIQSIISTVEPAQR		1	1	4	P36871	0	2799.39	High	4.67	V
FALSE	High	LFIGGLSFETTEESLR		1	1	8	P22626	0	1798.92	High	4.66	L
FALSE	High	VGQAVDVVGQAGKPK		1	1	1	Q13200	0	1452.82	High	4.66	V
FALSE	High	AIGSASEGAQSSLQEVYHK		1	1	3	P28066	0	1961.96	High	4.66	A
FALSE	High	VLETPQEIHTVSSEAVSLLEEVITPR		1	1	2	Q9H0A0	0	2876.53	High	4.66	V
FALSE	High	YSNEDTLSVALPYFWEHFDK		1	1	13	P26641	0	2461.13	High	4.66	Y
FALSE	High	IMRPTDVPDTGLLCDLLWSDPDK	1xCarbamidomethyl [C14]	1	1	1	P62140	0	2657.29	High	4.66	I
FALSE	High	FGQGGAGPVGGQGPR		1	1	2	P23246	0	1341.67	High	4.66	F
FALSE	High	TSSAETPTIPLGSAVEAIK		1	1	2	Q16891	0	1872	High	4.66	T
FALSE	High	IANEVIGEMNLKPEEVFLAQGTLRPDLIESASLVASGK		1	1	4	P49915	0	4039.14	High	4.66	I
FALSE	High	NQLDQEVEFLSTSIAQLK		1	1	5	Q99471	0	2063.07	High	4.66	N
FALSE	High	KPMVLGHEASGTVEK		1	1	1	Q00796	0	1582.83	High	4.66	K
FALSE	High	YPIEHGIVTNWDDMEK		1	2	2	P60709	0	1946.9	High	4.66	Y
FALSE	High	DLGLSESGEDVNAAILDESGK		1	1	1	P13667	0	2119	High	4.65	D
FALSE	High	TPEQCPSVVSLLSESYNPHVR	1xCarbamidomethyl [C5]	1	1	1	Q99460	0	2399.17	High	4.65	T
FALSE	High	LLQTDDEEEAGLLELLK		1	1	3	P55060	0	1929.01	High	4.65	L
FALSE	High	TGTAEMSSILEER		1	1	3	P25705	0	1423.67	High	4.65	T
FALSE	High	VNIAFNYDMPEDSDTYLHR		1	1	2	Q13838	0	2300.03	High	4.65	V
FALSE	High	NLVSEAIAAGIFNDLGSGSNIDLCVISK	1xCarbamidomethyl [C24]	1	1	3	Q99436	0	2877.47	High	4.65	N
FALSE	High	IDPTVTMMQVEEKPDVTYSDVGGCK	1xCarbamidomethyl [C24]	1	1	1	P35998	0	2799.29	High	4.65	I
FALSE	High	SYIEGYVPSQADVAVFEAVSSPPPADLCHALR	1xCarbamidomethyl [C28]	1	1	2	P24534	0	3445.67	High	4.64	S
FALSE	High	LQQELDDLLVDLDHQR		1	1	2	P35579	0	1949.99	High	4.64	L
FALSE	High	ERHPGSFDVVHVK		1	2	1	P62701	1	1506.78	High	4.64	E
FALSE	High	SDIDEVALQGIEFWSNVCDEEMDLAIEASEAAEQGRPPEHTSK	1xCarbamidomethyl [C18]	1	1	2	Q14974	0	4803.17	High	4.64	S
FALSE	High	ERESLQQMAEVTR		1	1	1	P14314	1	1576.77	High	4.64	E
FALSE	High	VLQHYQESDKGEELGPGNVQK		1	1	1	Q9Y6C9	1	2355.16	High	4.64	V
FALSE	High	LDGNELDLSLSDLNEVPVK		1	1	2	Q96AG4	0	2070.06	High	4.64	L
FALSE	High	HASPILPITEFSDIPR		1	1	1	P42167	0	1792.96	High	4.64	H
FALSE	High	VAAAESMPLLLECAR	1xCarbamidomethyl [C13]	1	1	1	O00410	0	1630.83	High	4.64	V
FALSE	High	HPDSHQLFIGNLPHEVDK		1	1	1	Q13283	0	2083.04	High	4.64	H
FALSE	High	IGIIGGTGLDDPEILEGR		1	1	2	Q13126	0	1824.97	High	4.64	I
FALSE	High	EALLSSAVDHGSDEVK		1	1	3	P78371	0	1656.81	High	4.64	E
FALSE	High	LVDISYGGENGFNQAIELSTEVLSNVK		1	1	3	P62495	0	2896.46	High	4.63	L
FALSE	High	MVNPTVFFDIAVDGEPLGR	1xAcetyl [N-Term]	1	1	11	P62937	0	2119.05	High	4.63	M
FALSE	High	TAFDEAIAELDTLSEESYK		1	1	23	P63104	0	2131.99	High	4.63	T
FALSE	High	YDQATDTILTVTENIFSSMGDAGEMVR		1	1	5	Q9Y490	0	2964.36	High	4.63	Y
FALSE	High	QLLCGAAIGTHEDDK	1xCarbamidomethyl [C4]	1	1	2	P12268	0	1627.77	High	4.63	Q
FALSE	High	MNPSAPSYPMASLYVGDLHPDVTEAMLYEK	1xAcetyl [N-Term]	1	1	3	P11940	0	3368.55	High	4.63	M
FALSE	High	QLIYNYPEQLFGAAGVMAIEHADFAGVER		1	1	1	P78371	0	3209.57	High	4.63	Q
FALSE	High	IHGTEEGQQILK		1	1	1	Q14980	0	1352.72	High	4.63	I
FALSE	High	VDIETPNLEGTLTGPR		1	1	1	Q09666	0	1711.89	High	4.63	V
FALSE	High	ALSNLESIPGGYNALR		1	2	1	Q9UMX0	0	1674.88	High	4.63	A
FALSE	High	VELNALMTDETISNVPILILGNK		1	1	5	Q9NR31	0	2497.36	High	4.63	V
FALSE	High	IDQLEGDHQLIQEALIFDNK		1	1	2	P12814	0	2339.19	High	4.63	I
FALSE	High	LLETTDRPDGHQNNLR		1	1	2	Q14974	0	1878.94	High	4.63	L
FALSE	High	ETVYCLNDDDETEVLK	1xCarbamidomethyl [C5]	1	1	2	P13010	0	1942.86	High	4.62	E
FALSE	High	LPLQLDDAVRPEAEGEEEGR		1	1	2	P14868	0	2223.09	High	4.62	L
FALSE	High	LPGELEPVQATQNK		1	1	2	O75821	0	1523.81	High	4.62	L
FALSE	High	TPENYPNAGLTMNYCR	1xCarbamidomethyl [C15]	1	1	1	P00747	0	1900.83	High	4.62	T
FALSE	High	GNLYSFGCPEYGQLGHNSDGK	1xCarbamidomethyl [C8]	1	1	1	Q9P258	0	2300	High	4.62	G
FALSE	High	SVLEDMEDSVLAVMPPDIAAEAQALR		1	1	4	Q7Z6Z7	0	2770.36	High	4.62	S
FALSE	High	LGGTIDDCELVEGLVLTQK	1xCarbamidomethyl [C8]	1	1	3	P50991	0	2060.06	High	4.62	L
FALSE	High	TAAAVAAQSGILDR		1	1	1	Q9Y6N5	0	1343.73	High	4.62	T
FALSE	High	WVDPNSPVLLEDPVLCALAK	1xCarbamidomethyl [C16]	1	1	9	P42330	0	2236.17	High	4.61	W
FALSE	High	LGEINVIGEPFLNVNCEHIK	1xCarbamidomethyl [C16]	1	1	1	P33991	0	2295.18	High	4.61	L
FALSE	High	DWILPSDYDHAEAEAR		1	1	2	O43852	0	1887.85	High	4.61	D
FALSE	High	GSLESPATDVFGSTEEGEK		1	1	1	O00232	0	1939.88	High	4.61	G
FALSE	High	IESDVQEPTEPEDDLDIMLGNK		1	1	1	P20042	0	2487.14	High	4.61	I
FALSE	High	STGEAFVQFASQEIAEK		2	2	4	P31943; P55795	0	1841.89	High	4.61	S
FALSE	High	VGTGEPCCDWVGDEGAGHFVK	2xCarbamidomethyl [C7; C8]	1	1	2	P52209	0	2276.97	High	4.61	V
FALSE	High	GDVVNQDDLYQALASGK		1	1	1	Q9UBQ7	0	1792.87	High	4.61	G
FALSE	High	GLLSDSMTDVPVDTGVAAR		1	1	2	O43399	0	1903.94	High	4.61	G
FALSE	High	YEEYDNAIITMMNHPTDAWK		1	1	2	Q00610	0	2442.07	High	4.61	Y
FALSE	High	MIAGQVLDINLAAEPK		1	1	7	P07910	0	1682.91	High	4.61	M
FALSE	High	YWPQEAGEYAVHVLCNSEDIR	1xCarbamidomethyl [C15]	1	1	4	P21333	0	2536.16	High	4.61	Y
FALSE	High	GETVNDCHAEIISR	1xCarbamidomethyl [C7]	1	1	1	P55265	0	1600.74	High	4.6	G
FALSE	High	GLGTDEDTLIEILASR		1	1	5	P04083	0	1702.89	High	4.6	G
FALSE	High	ETFGVNNAVYGIDAMNPSSR		1	1	4	O75822	0	2141.99	High	4.6	E
FALSE	High	CFIEEIPDETMVIGNYR	1xCarbamidomethyl [C1]	2	2	1	Q7Z7H5; Q9BVK6	0	2085.96	High	4.6	C
FALSE	High	TSIDAYDNFDNISLAQR		1	1	2	Q00610	0	1942.91	High	4.6	T
FALSE	High	YMIGVTYGGDDIPLSPYR		1	1	2	O75369	0	2016.97	High	4.6	Y
FALSE	High	STAGDTHLGGEDFDNR		1	2	5	P11142	0	1691.73	High	4.6	S
FALSE	High	MQEAMTQEVSDVFSDTTTPIK		1	1	2	P18206	0	2358.08	High	4.6	M
FALSE	High	AVELLGDIVQNCSLEDSQIEK	1xCarbamidomethyl [C12]	1	1	2	P31930	0	2360.16	High	4.6	A
FALSE	High	QMEQISQFLQAAER		1	1	3	P37802	0	1678.82	High	4.6	Q
FALSE	High	DDVAQTDLLQIDPNFGSK		1	1	4	P08195	0	1975.96	High	4.6	D
FALSE	High	CMIDQAHQEERPIR	1xCarbamidomethyl [C1]	1	1	1	Q9UBQ5	0	1782.84	High	4.6	C
FALSE	High	LLQDSVDFSLADAINTEFK		1	1	12	P08670	0	2126.07	High	4.6	L
FALSE	High	ASGNYATVISHNPETK		1	1	5	P62917	0	1688.82	High	4.6	A
FALSE	High	SLGTIQQCCDAIDHLCR	3xCarbamidomethyl [C8; C9; C16]	1	1	1	P78527	0	2046.92	High	4.59	S
FALSE	High	IQVTPPGFQLVFLPFADDK		1	1	9	P12956	0	2132.14	High	4.59	I
FALSE	High	QFDELCIPFVVIPATVSNNVPGSDFSVGADTALNTICTTCDR	3xCarbamidomethyl [C6; C37; C40]	1	1	2	P08237	0	4601.16	High	4.59	Q
FALSE	High	SLEPLPSSGPDFGGLGEEAEFVEVEPEAK		1	1	1	Q9Y512	0	3016.43	High	4.59	S
FALSE	High	VETDHIVAAVGLEPNVELAK		1	1	1	O95831	0	2104.13	High	4.59	V
FALSE	High	CGNQAAIMELDDTLK	1xCarbamidomethyl [C1]	1	2	1	P67775	0	1678.78	High	4.59	C
FALSE	High	EKPYFPIPEEYTFIQNVPLEDR		1	1	6	Q00839	0	2724.36	High	4.59	E
FALSE	High	TGAIVDVPVGEELLGR		1	1	5	P25705	0	1624.89	High	4.59	T
FALSE	High	TAVDSGIPLLTNFQVTK		1	1	3	P31327	0	1803.99	High	4.59	T
FALSE	High	INQVFHGSCITEGNELTK	1xCarbamidomethyl [C9]	1	1	1	P78527	0	2046.99	High	4.59	I
FALSE	High	AEDNADTLALVFEAPNQEK		1	1	6	P12004	0	2074.99	High	4.59	A
FALSE	High	GQCDLELINVCNENSLFK	2xCarbamidomethyl [C3; C11]	1	1	3	Q00610	0	2153	High	4.59	G
FALSE	High	QVQTSGGLWTECIAQLSPEQQAAIQELLNSA	1xCarbamidomethyl [C12]	1	1	3	O00410	0	3370.66	High	4.58	Q
FALSE	High	GNVQVVIPFLTESYSSSQDPPEK		1	1	2	P22314	0	2521.25	High	4.58	G
FALSE	High	LPRPPPPEMPESLK		1	1	4	Q00325	0	1587.86	High	4.58	L
FALSE	High	SADGSAPAGEGEGVTLQR		1	1	2	Q01650	0	1701.8	High	4.58	S
FALSE	High	TLTAAAVSGAQPILSK		1	1	1	O60664	0	1527.87	High	4.58	T
FALSE	High	CGAALAGHQLIR	1xCarbamidomethyl [C1]	1	1	1	P78527	0	1266.67	High	4.58	C
FALSE	High	WQLSVATEQPELEGPR		1	1	2	Q9NR30	0	1839.92	High	4.58	W
FALSE	High	HHAAYVNNLNVTEEK		1	1	2	P04179	0	1738.85	High	4.58	H
FALSE	High	VTAQGPGLEPSGNIANK		1	1	3	P21333	0	1652.86	High	4.57	V
FALSE	High	VIGLSSDLQQVGGASAR		1	1	1	O00303	0	1657.89	High	4.57	V
FALSE	High	AVSGASAGDYSDAIETLLTAIAVIK		1	1	6	Q8N684	0	2436.29	High	4.57	A
FALSE	High	LVQAFQYTDEHGEVCPAGWKPGSDTIKPNVDDSK	1xCarbamidomethyl [C15]	1	1	1	P32119	0	3788.79	High	4.57	L
FALSE	High	HGESAWNLENR		1	1	4	P18669	0	1312.6	High	4.57	H
FALSE	High	LSALGNVTTCNDYVALVHPDLDRETEEILADVLK	1xCarbamidomethyl [C10]	1	1	5	P56537	1	3783.91	High	4.57	L
FALSE	High	LFVGNLPPDITEEEMR		1	1	9	Q15233	0	1859.92	High	4.57	L
FALSE	High	LIALSIDSVEDHLAWSK		1	1	2	P30041	0	1897.01	High	4.57	L
FALSE	High	YPIEHGIITNWDDMEK		1	4	14	P68133	0	1960.91	High	4.57	Y
FALSE	High	EEGSEQAPLMSEDELINIIDGVLR		1	1	5	Q8NI22	0	2657.3	High	4.56	E
FALSE	High	METEQPEETFPNTETNGEFGK	1xAcetyl [N-Term]	1	1	3	P61978	0	2457.04	High	4.56	M
FALSE	High	EATTLANGVLASLNLPAAIEDVSGDTVPQSILTK		1	1	3	Q8WUM4	0	3408.81	High	4.56	E
FALSE	High	MQQQLDEYQELLDIK		1	1	5	P02545	0	1893.93	High	4.56	M
FALSE	High	ATAGDTHLGGEDFDNR		1	4	5	P0DMV9	0	1675.73	High	4.56	A
FALSE	High	CGFCHVGEEENEAR	2xCarbamidomethyl [C1; C4]	1	1	1	Q8IWS0	0	1693.67	High	4.56	C
FALSE	High	LSFQHDPETSVLVLR		1	1	3	Q14697	0	1740.93	High	4.55	L
FALSE	High	EALELTDTGLLSGSEER		1	1	1	Q14204	0	1819.89	High	4.55	E
FALSE	High	DVACGANHTLVLDSQK	1xCarbamidomethyl [C4]	1	1	3	Q9P258	0	1727.84	High	4.55	D
FALSE	High	ETDLLLDDSLVSIFGNR		1	1	9	P30044	0	1906.98	High	4.55	E
FALSE	High	VFSDEVQQQAQLSTIR		1	1	1	Q9Y262	0	1848.95	High	4.55	V
FALSE	High	TQGFLALFSGDTGEIK		1	1	2	Q9Y230	0	1683.86	High	4.55	T
FALSE	High	HALLEADVAAHQDR		1	1	1	Q13813	0	1545.78	High	4.55	H
FALSE	High	AIVAIENPADVSVISSR		1	1	6	P08865	0	1740.95	High	4.55	A
FALSE	High	DMAIATGGAVFGEEGLTLNLEDVQPHDLGK		1	1	4	P10809	0	3097.51	High	4.55	D
FALSE	High	VQANLGAPDINIEGLDAK		1	1	1	Q09666	0	1837.97	High	4.55	V
FALSE	High	ADIEVACYGYEGIDAVK	1xCarbamidomethyl [C7]	1	1	1	P05198	0	1872.87	High	4.55	A
FALSE	High	QQSIAGSADSKPIDVSR		1	1	1	Q12904	0	1758.9	High	4.54	Q
FALSE	High	LPIVNEDDELVAIIAR		1	1	1	P12268	0	1779.99	High	4.54	L
FALSE	High	SLGQNPTEAELQDMINEVDADGNGTIDFPEFLTMMAR		1	1	4	P0DP25	0	4069.85	High	4.54	S
FALSE	High	AATAPLLEAVDNLSAFASNPEFSSIPAQISPEGR		1	1	3	Q9Y490	0	3470.74	High	4.54	A
FALSE	High	ETKPEPMEEDLPENKK		1	1	3	P31948	1	1913.92	High	4.54	E
FALSE	High	IATSLDGFDVASVQQQR		1	1	1	O60664	0	1834.93	High	4.54	I
FALSE	High	LDNVPHTPSSYIETLPK		1	1	1	Q99733	0	1910.99	High	4.54	L
FALSE	High	GDIPDLSQAPSSLLDALEQHLASLEGK		1	1	2	Q13492	0	2804.43	High	4.53	G
FALSE	High	EAVFPFQPGSVAEVCITFDQANLTVK	1xCarbamidomethyl [C15]	1	1	1	P09382	0	2867.43	High	4.53	E
FALSE	High	SQTIYEIIDNSQGFYVCPVEPQNR	1xCarbamidomethyl [C17]	1	1	2	Q9Y617	0	2857.35	High	4.53	S
FALSE	High	MTDQEAIQDLWQWR		1	1	29	P06748	0	1819.84	High	4.53	M
FALSE	High	TVTNAVVTVPAYFNDSQR		1	1	10	P11142	0	1982	High	4.53	T
FALSE	High	IGGDAGTSLNSNDYGYGGQK		1	1	2	Q96AE4	0	1973.88	High	4.53	I
FALSE	High	VWGNVGTVEWADPIEDPDPEVMAK		1	1	2	O60506	0	2654.24	High	4.53	V
FALSE	High	NIIHGSDSVESAEK		1	1	3	P15531	0	1485.72	High	4.53	N
FALSE	High	IIDLEEAEDEIEDIQQEITVLSQCDSSYVTK	1xCarbamidomethyl [C24]	1	1	3	Q9P289	0	3612.7	High	4.53	I
FALSE	High	QGLNGVPILSEEELSLLDEFYK		1	1	2	Q14444	0	2493.28	High	4.53	Q
FALSE	High	LVSDGQALPEMEIHLQTNAEK		1	1	2	Q12931	0	2323.16	High	4.53	L
FALSE	High	SVNESLNNLFITEEDYQALR		1	1	3	Q00610	0	2355.15	High	4.53	S
FALSE	High	SAAPGSLGYQWLSDGSGVFEIAEASGVR		1	1	3	Q12931	0	2811.36	High	4.53	S
FALSE	High	MLPTIIADNAGYDSADLVAQLR		1	1	8	P78371	0	2347.2	High	4.53	M
FALSE	High	EVIAVSCGPAQCQETIR	2xCarbamidomethyl [C7; C12]	1	1	2	P38117	0	1917.92	High	4.53	E
FALSE	High	GVDNTFADELVELSTALEHQEYITFLEDLK		1	1	4	Q07021	0	3439.68	High	4.52	G
FALSE	High	DDVFLSVPCILGQNGISDLVK	1xCarbamidomethyl [C9]	1	1	16	P00338	0	2289.18	High	4.52	D
FALSE	High	GDADQASNILASFGLSAR		1	1	3	P43243	0	1792.88	High	4.52	G
FALSE	High	IYELAAGGTAVGTGLNTR		1	1	2	P07954	0	1763.93	High	4.52	I
FALSE	High	IDNSQVESGSLEDDWDFLPPKK		1	1	4	P27797	1	2519.19	High	4.51	I
FALSE	High	AIEPPPLDAVIEAEHTLR		1	1	1	Q08211	0	1971.05	High	4.51	A
FALSE	High	HGLEVIYMIEPIDEYCVQQLK	1xCarbamidomethyl [C16]	1	1	5	P07900	0	2577.27	High	4.51	H
FALSE	High	ICDQWDALGSLTHSR	1xCarbamidomethyl [C2]	1	1	2	O43707	0	1758.82	High	4.51	I
FALSE	High	NMAEQIIQEIYSQIQSK		1	1	14	P29401	0	2023.02	High	4.51	N
FALSE	High	ILDSVGIEADDDRLNK		1	1	5	P05387	1	1772.9	High	4.51	I
FALSE	High	LPAAGVGDMVMATVK		1	1	6	P62829	0	1459.76	High	4.51	L
FALSE	High	DPYTGQSVSLFQALK		1	1	1	Q15149	0	1653.85	High	4.51	D
FALSE	High	TFEEAAAQLLESSVQNLFK		1	1	4	Q9UKN8	0	2125.08	High	4.51	T
FALSE	High	GTQGATAGASSELDASK		1	1	1	O76094	0	1550.73	High	4.51	G
FALSE	High	TLYVEEVVPNVIEPSFGLGR		1	1	1	P41250	0	2218.18	High	4.51	T
FALSE	High	IFYPEIEEVQALDDTER		1	1	4	P33316	0	2066.99	High	4.51	I
FALSE	High	TLAQLNPESSLFIIASK		1	1	6	P06744	0	1832.02	High	4.51	T
FALSE	High	ESSETPDQFMTADETR		1	1	2	P16070	0	1843.77	High	4.5	E
FALSE	High	DAQVVQVVLDGLSNILK		1	1	7	O00629	0	1811.03	High	4.5	D
FALSE	High	MALDALLQEIALSEPQLCEVLQVAGPDR	1xCarbamidomethyl [C18]	1	1	2	Q7Z2W4	0	3079.58	High	4.5	M
FALSE	High	TTGLVGLAVCNTPHER	1xCarbamidomethyl [C10]	1	1	1	Q16718	0	1724.87	High	4.5	T
FALSE	High	LIEGLSHEVIVSAACGR	1xCarbamidomethyl [C15]	1	1	1	Q9P258	0	1810.95	High	4.5	L
FALSE	High	VPDGKPENEFAFNAEFK		1	1	3	Q15181	0	1938.92	High	4.5	V
FALSE	High	NQLTSNPENTVFDAK		1	1	5	P11021	0	1677.81	High	4.5	N
FALSE	High	GDVPSVGLEGPDVDLQGPEAK		1	1	1	Q09666	0	2079.02	High	4.5	G
FALSE	High	GNFTLPEVAECFDEITYVELQK	1xCarbamidomethyl [C11]	1	1	13	Q00839	0	2602.24	High	4.5	G
FALSE	High	YTPVQQGPVGVNVTYGGDPIPK		1	1	3	P21333	0	2286.18	High	4.5	Y
FALSE	High	RPAEDMEEEQAFK		1	1	4	P61978	0	1579.71	High	4.5	R
FALSE	High	DAGYGGLSLSIEGPSK		1	1	1	P21333	0	1550.77	High	4.5	D
FALSE	High	LVSSPCCIVTSTYGWTANMER	2xCarbamidomethyl [C6; C7]	1	1	4	P08238	0	2432.1	High	4.5	L
FALSE	High	EELIAELQDCEGLIVR	1xCarbamidomethyl [C10]	1	1	2	O43175	0	1886.95	High	4.5	E
FALSE	High	RFDDAVVQSDMK		1	1	6	P11142	1	1410.67	High	4.49	R
FALSE	High	CEYLMELMTPAACPEPPPEAPTEDDHDEL	2xCarbamidomethyl [C1; C13]	1	1	3	P14314	0	3357.39	High	4.49	C
FALSE	High	ACGDSTLTQITAGLDPVGR	1xCarbamidomethyl [C2]	1	1	1	P62879	0	1931.95	High	4.49	A
FALSE	High	DGDVTVTNDGATILSMMDVDHQIAK		1	1	2	P48643	0	2646.24	High	4.49	D
FALSE	High	SGMDAALDDLIDTLGGPEETEEENTTYTGPEVSDPMSSTYIEELGK		1	1	1	P20810	0	4907.17	High	4.49	S
FALSE	High	LGSAGGLGSTLGGSSYSSCYSFGSGGGYGSSFGGVDGLLAGGEK	1xCarbamidomethyl [C19]	1	1	2	Q04695	0	4024.81	High	4.49	L
FALSE	High	AASDIAMTELPPTHPIR		1	1	2	P62258	0	1819.94	High	4.49	A
FALSE	High	LQVTNVLSQPLTQATVK		1	1	1	P04844	0	1840.05	High	4.49	L
FALSE	High	ATIAGGGVIPHIHK		1	2	4	Q71UI9	0	1370.79	High	4.49	A
FALSE	High	SALQSINEWAAQTTDGK		1	1	2	P50454	0	1819.88	High	4.48	S
FALSE	High	DPVQEAWAEDVDLR		1	1	9	P14618	0	1642.77	High	4.48	D
FALSE	High	DETVSDCSPHIANIGR	1xCarbamidomethyl [C7]	1	1	1	P47756	0	1770.81	High	4.48	D
FALSE	High	VLLVSPELQAAVEEILPSLK		1	1	4	O14975	0	2148.25	High	4.48	V
FALSE	High	LFLNETQTQEITEDIPVK		1	1	2	P41252	0	2118.1	High	4.48	L
FALSE	High	ESTLEAIGYICQDIDPEQLQDK	1xCarbamidomethyl [C11]	1	1	1	Q14974	0	2565.2	High	4.48	E
FALSE	High	VLFASQEIPASPFR		1	1	2	O75369	0	1561.84	High	4.48	V
FALSE	High	HWILPQDYDHAQAEAR		1	1	2	Q15293	0	1949.93	High	4.48	H
FALSE	High	QDLMNIAGTTLSSK		1	1	2	P78371	0	1478.75	High	4.48	Q
FALSE	High	DEYDDLSDLTAAQQETLSDWESQFTFK		1	1	3	O00264	0	3182.4	High	4.47	D
FALSE	High	SLETENSALQLQVTER		1	1	1	P20700	0	1817.92	High	4.47	S
FALSE	High	FIQENIFGICPHMTEDNK	1xCarbamidomethyl [C10]	1	1	2	P30101	0	2193.01	High	4.47	F
FALSE	High	LDGLVETPTGYIESLPR		1	1	4	P55209	0	1859.97	High	4.47	L
FALSE	High	VTTMDAELEFAIQPNTTGK		3	3	3	P35241; P26038; P15311	0	2066.01	High	4.47	V
FALSE	High	VFEVSLADLQNDEVAFR		1	1	11	P61247	0	1951.98	High	4.47	V
FALSE	High	SDPLCVLLQDVGGGSWAELGR	1xCarbamidomethyl [C5]	1	1	4	Q99829	0	2229.1	High	4.47	S
FALSE	High	VAGMDVELTVEER		1	1	2	P62258	0	1447.71	High	4.47	V
FALSE	High	LYQPEYQEVSTEEQREEISGK		1	1	1	Q9Y4L1	1	2542.19	High	4.47	L
FALSE	High	FAALDNEEEDKEEEIIK		1	1	1	Q8NE71	1	2021.95	High	4.47	F
FALSE	High	SPFSVAVSPSLDLSK		1	1	3	P21333	0	1533.82	High	4.46	S
FALSE	High	IPEISIQDMTAQVTSPSGK		1	1	5	P21333	0	2002.02	High	4.46	I
FALSE	High	DNLTLWTSDMQGDGEEQNK		1	1	5	P62258	0	2180.94	High	4.46	D
FALSE	High	MAKPEEVLVVENDQGEVVR		1	1	1	O14980	0	2141.09	High	4.46	M
FALSE	High	QELSHALYQHDAACR	1xCarbamidomethyl [C14]	1	1	3	Q9UMS4	0	1798.83	High	4.46	Q
FALSE	High	DSEMGQQSLLFQIDYPEIAEGIMPR		1	1	2	Q15428	0	2867.36	High	4.46	D
FALSE	High	NDALEMVEETTWQGLK		1	1	1	P49748	0	1863.88	High	4.46	N
FALSE	High	HSPSIHQSVVAVSR		1	1	1	P35573	0	1503.8	High	4.46	H
FALSE	High	AGCECLNESDEHGFDNCLR	3xCarbamidomethyl [C3; C5; C17]	1	1	1	O43396	0	2282.89	High	4.46	A
FALSE	High	EGLYFNPYFPGQAIAMAPPIYTDVLEFDDGTPATMSQIAK		1	1	4	P08574	0	4379.09	High	4.46	E
FALSE	High	LLGPSAAADILQLSSSLPLQSR		1	1	2	Q7Z6Z7	0	2237.25	High	4.46	L
FALSE	High	DAIITCNPEEFIVEALQLPNFQQSVQEYR	1xCarbamidomethyl [C6]	1	1	2	Q9BQ52	0	3451.68	High	4.46	D
FALSE	High	LTAQVASLTSELTTLNATIQQQDQELAGLK		1	1	1	Q14980	0	3185.69	High	4.46	L
FALSE	High	AAVATFLQSVQVPEFTPK		1	1	4	P22314	0	1933.04	High	4.46	A
FALSE	High	VDTMIVQAISLLDDLDK		1	1	8	Q9Y2X3	0	1888.99	High	4.46	V
FALSE	High	VLAQNSGFDLQETLVK		1	1	2	P40227	0	1761.94	High	4.45	V
FALSE	High	KFDPMGQQTCSAHPAR	1xCarbamidomethyl [C10]	1	1	2	Q9NPE3	1	1830.84	High	4.45	K
FALSE	High	IHFPLATYAPVISAEK		3	6	49	Q71U36; Q9BQE3; P68366	0	1756.96	High	4.45	I
FALSE	High	DSEDNPQTLLFSATCPHWVFNVAK	1xCarbamidomethyl [C15]	1	1	1	Q9NR30	0	2776.3	High	4.45	D
FALSE	High	HVGDLGNVTADK		1	1	3	P00441	0	1225.62	High	4.45	H
FALSE	High	VGAHAGEYGAEALER		1	1	6	P69905	0	1529.73	High	4.45	V
FALSE	High	FGDPECQVILPLLK	1xCarbamidomethyl [C6]	1	1	2	P22102	0	1628.87	High	4.45	F
FALSE	High	IEGCIIGFDEYMNLVLDDAEEIHSK	1xCarbamidomethyl [C4]	1	1	4	P62304	0	2910.35	High	4.45	I
FALSE	High	MTEWETAAPAVAETPDIK	1xAcetyl [N-Term]	1	1	4	P46782	0	2001.95	High	4.45	M
FALSE	High	LEQELFSGGNTGINFEK		1	2	1	O00571	0	1882.92	High	4.45	L
FALSE	High	QAVTNPNNTFYATK		1	1	3	P38646	0	1568.77	High	4.44	Q
FALSE	High	YGIICMEDLIHEIYTVGK	1xCarbamidomethyl [C5]	1	1	8	P18124	0	2154.06	High	4.44	Y
FALSE	High	VDSDDQWGEYSCVFLPEPMGTANIQLHGPPR	1xCarbamidomethyl [C12]	1	1	3	P35613	0	3515.6	High	4.44	V
FALSE	High	IITLEEGDIILTGTPK		1	1	1	Q6P587	0	1712.97	High	4.44	I
FALSE	High	TITLEVEPSDTIENVK		1	4	11	P62979	0	1787.93	High	4.44	T
FALSE	High	HELQANCYEEVK	1xCarbamidomethyl [C7]	1	1	6	P23528	0	1519.68	High	4.44	H
FALSE	High	GENSWFSTQVDTVATK		1	1	2	P08195	0	1769.83	High	4.44	G
FALSE	High	FYPEDVSEELIQDITQR		1	1	18	P26038	0	2082	High	4.44	F
FALSE	High	STFFNVLTNSQASAENFPFCTIDPNESR	1xCarbamidomethyl [C20]	1	1	3	Q9NTK5	0	3193.45	High	4.44	S
FALSE	High	DYDALFPVAEDISLLQQASSVLDETR		1	1	1	Q9H1I8	0	2895.43	High	4.44	D
FALSE	High	NEAETTSMVSMPLYAVMYPVFNELER		1	1	3	Q9BUL8	0	3021.4	High	4.44	N
FALSE	High	ILTSVDQYLELIGNSLPGTTAK		1	1	4	Q96TA1	0	2333.26	High	4.44	I
FALSE	High	EQLIDMNAEGDETGVMDSLLEALQSGAAFR		1	1	2	O60610	0	3210.49	High	4.44	E
FALSE	High	DAEDAMDAMDGAVLDGR		1	1	2	Q01130	0	1751.72	High	4.43	D
FALSE	High	VFIMDNCEELIPEYLNFIR	1xCarbamidomethyl [C7]	1	1	11	P07900	0	2415.17	High	4.43	V
FALSE	High	EHALLAYTLGVK		1	3	6	P68104	0	1314.74	High	4.43	E
FALSE	High	MDENQFVAVTSTNAAK		1	3	1	Q16555	0	1725.81	High	4.43	M
FALSE	High	QLVEQVEQIQK		1	1	1	Q9BVK6	0	1341.74	High	4.43	Q
FALSE	High	TGDDYIAIGADEEELGSQIEEAIYQEIR		1	1	2	P23193	0	3127.46	High	4.43	T
FALSE	High	QAGEVTFADAHRPK		1	1	1	Q13243	0	1526.77	High	4.43	Q
FALSE	High	RPLRPQVVTDDDGQAPEAK		1	1	2	Q9HDC9	0	2092.08	High	4.43	R
FALSE	High	AEDGSVIDYELIDQDAR		1	1	5	P07355	0	1908.88	High	4.43	A
FALSE	High	FDPETNSDDACTYHPGVPVFHDALK	1xCarbamidomethyl [C11]	1	1	1	Q9UHD1	0	2832.26	High	4.43	F
FALSE	High	HLNEIDLFHCIDPNDSK	1xCarbamidomethyl [C10]	1	1	5	Q15185	0	2066.96	High	4.43	H
FALSE	High	LSVLDLVVALAPCADEAAISK	1xCarbamidomethyl [C13]	1	1	3	Q5JTH9	0	2155.17	High	4.43	L
FALSE	High	QETEVELYNEFPEPIK		1	1	1	P51149	0	1964.95	High	4.42	Q
FALSE	High	VPTANVSVVDLTCR	1xCarbamidomethyl [C13]	1	1	8	P04406	0	1530.79	High	4.42	V
FALSE	High	EDTESLEIFQNEVAR		1	1	1	Q9BS26	0	1779.84	High	4.42	E
FALSE	High	FGGNPGGFGNQGGFGNSR		1	1	1	Q13148	0	1726.77	High	4.42	F
FALSE	High	SDALETLGFLNHYQMK		1	1	2	P14866	0	1866.91	High	4.42	S
FALSE	High	TILSNQTVDIPENVDITLK		1	1	5	P32969	0	2113.14	High	4.42	T
FALSE	High	SHTEEDCTEELFDFLHAR	1xCarbamidomethyl [C7]	1	1	1	P07919	0	2235.96	High	4.42	S
FALSE	High	YDERPGPSPLPHR		1	1	1	P08621	0	1520.76	High	4.42	Y
FALSE	High	QILVGDIGDTVEDPYTSFVK		1	1	1	Q9Y281	0	2196.11	High	4.42	Q
FALSE	High	DELNADHPFIYIIR		1	1	3	P36952	0	1715.88	High	4.42	D
FALSE	High	LIEAEDNMNCQMSNITVTYR	1xCarbamidomethyl [C10]	1	1	1	P62318	0	2402.08	High	4.42	L
FALSE	High	ATENDIANFFSPLNPIR		1	1	3	P31942	0	1918.97	High	4.42	A
FALSE	High	VFTTQELVQAFTHAPATLEADR		1	1	1	O95433	0	2445.24	High	4.42	V
FALSE	High	MEDYQAAEETAFVVDEVSNIVK	1xAcetyl [N-Term]	1	1	1	P63172	0	2529.17	High	4.42	M
FALSE	High	EQTGATASVIYVPPPFAAAAINEAIEAEIPLVVCITEGIPQQDMVR	1xCarbamidomethyl [C34]	1	1	1	P53597	0	4879.49	High	4.42	E
FALSE	High	GYTSWAIGLSVADLAESIMK		1	1	3	P00338	0	2112.07	High	4.42	G
FALSE	High	KPLLESGTLGTK		1	1	3	P22314	0	1243.73	High	4.42	K
FALSE	High	VNNVVWDLDRPLEEDCTLELLK	1xCarbamidomethyl [C16]	1	1	9	P26639	0	2670.34	High	4.42	V
FALSE	High	SLVASLAEPDFVVTDFAK		1	1	14	P22314	0	1909	High	4.41	S
FALSE	High	ISNTAISISDHTALAQFCK	1xCarbamidomethyl [C18]	1	1	1	P22102	0	2077.04	High	4.41	I
FALSE	High	STNLLAAETASLEEQLQGWGEVMLMADK		1	1	4	Q15041	0	3035.47	High	4.41	S
FALSE	High	TEFLSFMNTELAAFTK		1	1	21	P31949	0	1849.9	High	4.41	T
FALSE	High	HSSLITPLQAVAQR		1	1	1	P78527	0	1520.85	High	4.41	H
FALSE	High	NEVLMVNIGSLSTGGR		1	2	1	P41091	0	1646.85	High	4.41	N
FALSE	High	LATQSNEITIPVTFESR		1	1	4	P04792	0	1905.99	High	4.41	L
FALSE	High	GISHVIVDEIHER		1	1	1	Q08211	0	1503.79	High	4.41	G
FALSE	High	EAIETIVAAMSNLVPPVELANPENQFR		1	2	6	Q5JWF2	0	2952.51	High	4.41	E
FALSE	High	LEQFVSILMASIPLPDK		1	1	5	P00491	0	1901.05	High	4.41	L
FALSE	High	GVGIISEGNETVEDIAAR		1	3	1	P05023	0	1829.92	High	4.41	G
FALSE	High	YAICSALAASALPALVMSK	1xCarbamidomethyl [C4]	1	1	3	P36578	0	1937.02	High	4.41	Y
FALSE	High	SKPGAAMVEMADGYAVDR		1	1	2	P14866	0	1867.87	High	4.41	S
FALSE	High	GTADVTHDLQEMK		1	1	2	P11166	0	1444.67	High	4.4	G
FALSE	High	IEDLSQQAQLAAAEK		1	2	4	Q13765	0	1614.83	High	4.4	I
FALSE	High	LAQANGWGVMVSHR		1	1	5	P06733	0	1525.77	High	4.4	L
FALSE	High	QSLGELIGTLNAAK		1	1	3	P60174	0	1414.79	High	4.4	Q
FALSE	High	RDPHLACVAYER	1xCarbamidomethyl [C7]	1	2	1	Q00610	1	1486.72	High	4.4	R
FALSE	High	QYYTLLNQAPDMLHR		1	1	1	Q13283	0	1862.92	High	4.4	Q
FALSE	High	YLLSQSSPAPLTAAEEELR		1	1	1	Q12792	0	2075.07	High	4.4	Y
FALSE	High	QIVWNGPVGVFEWEAFAR		1	1	1	P00558	0	2105.06	High	4.4	Q
FALSE	High	VADNLAIQLAAVTEDK		1	1	1	Q12906	0	1670.9	High	4.4	V
FALSE	High	AITIANQTNCPLYITK	1xCarbamidomethyl [C10]	1	1	1	Q16555	0	1820.96	High	4.4	A
FALSE	High	EEIQSSISGVTAAYNR		1	1	2	P46940	0	1724.84	High	4.4	E
FALSE	High	IATLDMSSDQIAANLQAVINEVCR	1xCarbamidomethyl [C23]	1	1	1	Q9BYD6	0	2632.31	High	4.4	I
FALSE	High	SLDLFNCEVTNLNDYR	1xCarbamidomethyl [C7]	2	2	5	P39687; Q92688	0	1972.91	High	4.39	S
FALSE	High	NLFEDQNTLTSICEK	1xCarbamidomethyl [C13]	1	1	2	P55060	0	1811.85	High	4.39	N
FALSE	High	LGAGYPMGPFELLDYVGLDTTK		1	1	8	Q16836	0	2357.17	High	4.39	L
FALSE	High	HPVTGQFLYQDSNWASK		1	1	1	P02786	0	1977.95	High	4.39	H
FALSE	High	IPDQLVILDMK		1	1	2	P49755	0	1284.72	High	4.39	I
FALSE	High	VGLTNYAAAYCTGLLLAR	1xCarbamidomethyl [C11]	1	1	1	P46777	0	1927.01	High	4.39	V
FALSE	High	IANLQTDLSDGLR		1	1	2	P21333	0	1415.75	High	4.39	I
FALSE	High	AVTPPMPLLTPATPGGLPPAAAVAAAAATAK		1	1	1	Q9UHX1	0	2794.55	High	4.38	A
FALSE	High	NPDDITNEEYGEFYK		1	1	3	P07900	0	1833.78	High	4.38	N
FALSE	High	HSGNITFDEIVNIAR		1	1	3	P30050	0	1685.86	High	4.38	H
FALSE	High	EEIVQFFSGLEIVPNGMTLPVDFQGR		1	1	1	P55795	0	2922.47	High	4.38	E
FALSE	High	DAGEGLLAVQITDPEGKPK		1	1	2	P21333	0	1938.02	High	4.38	D
FALSE	High	VIHLSNLPHSGYSDSAVLK		1	1	1	P43243	0	2037.08	High	4.38	V
FALSE	High	CESAPGCGVWQRPVIDNPNYK	2xCarbamidomethyl [C1; C7]	1	1	2	P27824	0	2447.12	High	4.38	C
FALSE	High	HLPTLDHPIIPADYVAIK		1	1	7	P31327	0	2013.12	High	4.38	H
FALSE	High	MVNPTVFFDIAVDGEPLGR		1	1	6	P62937	0	2077.04	High	4.37	M
FALSE	High	TQTVCNFTDGALVQHQEWDGK	1xCarbamidomethyl [C5]	1	2	1	A8MUU1	0	2434.11	High	4.37	T
FALSE	High	HVFGESDELIGQK		1	1	6	P60174	0	1458.72	High	4.37	H
FALSE	High	DVLIQGLIDENPGLQLIIR		1	1	5	P78527	0	2119.21	High	4.37	D
FALSE	High	DDPITLFVALSPQGTAQGELFLDDGHTFNYQTR		1	1	1	Q14697	0	3666.77	High	4.37	D
FALSE	High	NPYYGGESASITPLEDLYK		1	1	2	P50395	0	2117.01	High	4.37	N
FALSE	High	FGIVTSSAGTGTTEDTEAK		1	1	1	P82979	0	1871.89	High	4.37	F
FALSE	High	VDCTAHSDVCSAQGVR	2xCarbamidomethyl [C3; C10]	1	1	2	Q8NBS9	0	1761.76	High	4.37	V
FALSE	High	LAPITSDPTEATAVGAVEASFK		1	1	49	P14618	0	2175.12	High	4.37	L
FALSE	High	DASIVGFFDDSFSEAHSEFLK		1	1	9	P30101	0	2348.07	High	4.37	D
FALSE	High	NPDDITQEEYGEFYK		1	1	4	P08238	0	1847.8	High	4.37	N
FALSE	High	VAVNDAHLLQYNHR		1	1	3	P17931	0	1649.85	High	4.37	V
FALSE	High	VTEGLVDVILYHQPDDK		1	1	2	O43390	0	1941	High	4.37	V
FALSE	High	IVAFADAAVEPIDFPIAPVYAASMVLK		1	1	4	P24752	0	2818.51	High	4.37	I
FALSE	High	LDVGNFSWGSECCTR	2xCarbamidomethyl [C12; C13]	1	1	3	P62241	0	1787.75	High	4.37	L
FALSE	High	QTAQQIVSHVQNK		1	1	1	Q9NZB2	0	1480.79	High	4.37	Q
FALSE	High	DQFPEVYVPTVFENYIADIEVDGK		1	1	4	P08134	0	2787.34	High	4.37	D
FALSE	High	QLEAIDQLHLEYAK		1	1	1	O43707	0	1670.87	High	4.37	Q
FALSE	High	EEENVGIDITEPLYMQR		1	1	1	P33991	0	2035.96	High	4.36	E
FALSE	High	IDATQVEVNPFGETPEGQVVCFDAK	1xCarbamidomethyl [C21]	1	1	1	Q96I99	0	2750.3	High	4.36	I
FALSE	High	SPQELLCGASLISDR	1xCarbamidomethyl [C7]	1	1	5	P00734	0	1645.82	High	4.36	S
FALSE	High	QAQIEVVPSASALIIK		1	1	5	P30050	0	1666.97	High	4.36	Q
FALSE	High	ATENDIYNFFSPLNPVR		2	2	17	P31943; P52597	0	1996.98	High	4.36	A
FALSE	High	SVMDATQIAGLNCLR	1xCarbamidomethyl [C13]	1	1	1	P34932	0	1648.81	High	4.36	S
FALSE	High	GMSLNLEPDNVGVVVFGNDK		1	1	7	P25705	0	2104.04	High	4.36	G
FALSE	High	MQNDAGEFVDLYVPR	1xAcetyl [N-Term]	1	1	5	P63220	0	1795.83	High	4.36	M
FALSE	High	EEGETADTVGCCSLR	2xCarbamidomethyl [C11; C12]	1	1	1	P11387	0	1683.69	High	4.36	E
FALSE	High	EFADSLGIPFLETSAK		2	3	7	P62820; Q9H0U4	0	1724.87	High	4.35	E
FALSE	High	KVEEAEPEEFVVEK		1	1	3	Q13185	1	1661.83	High	4.35	K
FALSE	High	EQQHVMEELFQSSFR		1	1	1	P78527	0	1894.88	High	4.35	E
FALSE	High	HEQILVLDPPTDLK		1	1	2	Q9P0L0	0	1617.88	High	4.35	H
FALSE	High	SINPLGGFVHYGEVTNDFVMLK		1	1	6	P39023	0	2437.22	High	4.35	S
FALSE	High	IWCFGPDGTGPNILTDITK	1xCarbamidomethyl [C3]	1	1	21	P13639	0	2105.04	High	4.35	I
FALSE	High	GYEVIYLTEPVDEYCIQALPEFDGK	1xCarbamidomethyl [C15]	1	1	4	P14625	0	2948.39	High	4.35	G
FALSE	High	INPYMSSPCHIEMILTEK	1xCarbamidomethyl [C9]	1	1	1	P18621	0	2163.03	High	4.35	I
FALSE	High	MMDYLQGSGETPQTDVR		1	1	3	Q14697	0	1927.85	High	4.35	M
FALSE	High	NVFDEAILAALEPPEPK		1	1	10	P60953	0	1852.97	High	4.35	N
FALSE	High	IQDVGLVPMGGVMSGAVPAAAAQEAVEEDIPIAK		1	1	3	P52815	0	3333.71	High	4.35	I
FALSE	High	EEDGSLSLDGADSTGVVAK		1	1	1	Q13263	0	1849.87	High	4.35	E
FALSE	High	APGTVLSQEEVEGELAELAMGFLGSR		1	1	1	P49593	0	2690.33	High	4.35	A
FALSE	High	WSTDDVQINDISLQDYIAVK		1	1	4	P46782	0	2323.15	High	4.35	W
FALSE	High	AVFVDLEPTVIDEVR		2	3	36	Q71U36; Q9BQE3	0	1701.91	High	4.35	A
FALSE	High	VPSENVLGEVGSGFK		1	1	2	P49748	0	1518.78	High	4.35	V
FALSE	High	FGVPVIADGGIQNVGHIAK		1	1	2	P12268	0	1892.04	High	4.35	F
FALSE	High	AFVHWYVGEGMEEGEFSEAR		3	6	1	Q71U36; Q9BQE3; P68366	0	2330.02	High	4.35	A
FALSE	High	FQDTAEALAAFTALMEGK		1	1	5	Q9Y2X3	0	1913.93	High	4.34	F
FALSE	High	QAASSLQQASLK		1	1	2	P38646	0	1231.66	High	4.34	Q
FALSE	High	SNQQLENDLNLMDIK		1	1	1	P46940	0	1774.86	High	4.34	S
FALSE	High	FLSQPFQVAEVFTGHMGK		1	1	12	P06576	0	2023.01	High	4.34	F
FALSE	High	ANIVHLMLSSPEQIQK		1	1	1	P55060	0	1807.97	High	4.34	A
FALSE	High	AEYEGDGIPTVFVAVAGR		1	1	3	P22234	0	1850.93	High	4.34	A
FALSE	High	YFILPDSLPLDTLLVDVEPK		1	1	12	P62314	0	2287.25	High	4.34	Y
FALSE	High	ASLEAAIADAEQR		1	1	5	P05787	0	1344.68	High	4.34	A
FALSE	High	GVVPLAGTNGETTTQGLDGLSER		1	1	4	P04075	0	2272.14	High	4.34	G
FALSE	High	DNYVPEVSALDQEIIEVDPDTK		1	1	4	P08708	0	2489.19	High	4.34	D
FALSE	High	SPYTVTVGQACNPSACR	2xCarbamidomethyl [C11; C16]	1	1	2	P21333	0	1867.84	High	4.34	S
FALSE	High	ILLQGTPVAQMTEDAVDAER		1	1	6	P01024	0	2157.09	High	4.34	I
FALSE	High	VGEATETALTCLVEK	1xCarbamidomethyl [C11]	1	2	1	P16615	0	1620.81	High	4.34	V
FALSE	High	VDNIQAGELTEGIWR		1	1	2	Q08945	0	1700.86	High	4.34	V
FALSE	High	TLSSSTQASIEIDSLYEGIDFYTSITR		1	1	6	P11142	0	2997.46	High	4.34	T
FALSE	High	LNLEHIATSSAVSK		1	1	1	Q96QK1	0	1469.8	High	4.34	L
FALSE	High	KPAEQAEETAPIEATATK		1	1	1	Q8N4Q1	0	1884.95	High	4.33	K
FALSE	High	DAGEGGLSLAIEGPSK		1	1	2	P21333	0	1500.75	High	4.33	D
FALSE	High	AAGVNVEPFWPGLFAK		1	1	9	P05386	0	1702.9	High	4.33	A
FALSE	High	GHAGSVDSIAVDGSGTK		1	1	1	Q9GZL7	0	1557.75	High	4.33	G
FALSE	High	GLQVDLQSDGAAAEDIVASEQSLGQK		1	1	1	P33991	0	2629.3	High	4.33	G
FALSE	High	FTQAGSEVSALLGR		1	1	5	P06576	0	1435.75	High	4.33	F
FALSE	High	MEVGPTMVGDEQSDPELMQHLGASK		1	1	2	P30047	0	2686.22	High	4.33	M
FALSE	High	VVVAENFDEIVNNENK		1	1	5	P30101	0	1832.9	High	4.32	V
FALSE	High	MLDAEDIVNTARPDEK		1	1	2	O43707	0	1816.87	High	4.32	M
FALSE	High	QEGIATSDNFMQAFLNVLDQCPK	1xCarbamidomethyl [C21]	1	1	1	P78344	0	2626.23	High	4.32	Q
FALSE	High	NPPGFAFVEFEDPRDAADAVR		1	1	1	P84103	1	2320.1	High	4.32	N
FALSE	High	VGEPGQAGNPALVSAYGTGLEGGTTGIQSEFFINTTR		1	1	1	O75369	0	3696.81	High	4.32	V
FALSE	High	SQVFSTAADGQTQVEIK		1	1	2	P38646	0	1808.9	High	4.32	S
FALSE	High	MSATFIGNSTAIQELFK		1	3	13	P68371	0	1857.94	High	4.32	M
FALSE	High	VDNDENEHQLSLR		1	1	6	P06748	0	1568.73	High	4.32	V
FALSE	High	AIAELGIYPAVDPLDSTSR		1	1	10	P06576	0	1988.03	High	4.32	A
FALSE	High	LGGSLADSYLDEGFLLDK		1	1	1	P78371	0	1912.95	High	4.32	L
FALSE	High	TVAGQDAVIVLLGTR		1	1	1	P30043	0	1512.87	High	4.32	T
FALSE	High	IISNASCTTNCLAPLAK	2xCarbamidomethyl [C7; C11]	1	1	8	P04406	0	1833.92	High	4.32	I
FALSE	High	GIEILTDMSRPVELSDR		1	1	3	P50991	0	1930.99	High	4.32	G
FALSE	High	KAEAGAGSATEFQFR		1	2	1	P46783	1	1569.77	High	4.32	K
FALSE	High	LCPGGQLPFLLYGTEVHTDTNK	1xCarbamidomethyl [C2]	1	1	2	O00299	0	2460.22	High	4.32	L
FALSE	High	IDINMSGFNETDDLK		1	1	2	P13797	0	1711.78	High	4.32	I
FALSE	High	NNNIDAAIENIENMLTSENK		1	1	1	P42704	0	2247.06	High	4.32	N
FALSE	High	CPNPTCENMNFSWR	2xCarbamidomethyl [C1; C6]	1	1	2	P35637	0	1812.73	High	4.32	C
FALSE	High	DHINLPGFSGQNPLR		1	1	1	P00491	0	1664.85	High	4.31	D
FALSE	High	TIAECLADELINAAK	1xCarbamidomethyl [C5]	1	1	22	P46782	0	1631.83	High	4.31	T
FALSE	High	DLTLDQAYSYAVENAK		1	1	2	P23381	0	1800.87	High	4.31	D
FALSE	High	ALVLELCCNDESGEDVEVPYVR	2xCarbamidomethyl [C7; C8]	1	1	1	P22314	0	2566.18	High	4.31	A
FALSE	High	YLEVVLNTLQQASQAQVDK		1	1	2	Q14974	0	2147.13	High	4.31	Y
FALSE	High	NVIFEISPTEEVGDFEVK		1	1	2	P46940	0	2052.02	High	4.31	N
FALSE	High	GVDEVTIVNILTNR		1	1	14	P07355	0	1542.85	High	4.31	G
FALSE	High	VADGMVFGALLPCEECSGQLVFK	2xCarbamidomethyl [C13; C16]	1	1	1	P09874	0	2527.2	High	4.31	V
FALSE	High	IQDALSTVLQYAEDVLSGK		1	1	3	O00303	0	2050.07	High	4.31	I
FALSE	High	LVINGNPITIFQER		1	1	24	P04406	0	1613.9	High	4.31	L
FALSE	High	NVTELNEPLSNEER		1	1	2	P61981	0	1643.79	High	4.31	N
FALSE	High	TDLNPDNLQGGDDLDPNYVLSSR		1	1	2	P12277	0	2518.17	High	4.31	T
FALSE	High	LSGSNPYTTVTPQIINSK		1	1	2	O43707	0	1920.01	High	4.31	L
FALSE	High	IVSSSDVGHDEYSTQSLVK		1	1	1	Q01082	0	2050.99	High	4.31	I
FALSE	High	NQVALNPQNTVFDAK		1	1	3	P0DMV9	0	1658.85	High	4.31	N
FALSE	High	AGYSTDESSSSSLHATR		1	1	1	P51116	0	1755.78	High	4.31	A
FALSE	High	QDLADVVQVCEGK	1xCarbamidomethyl [C10]	1	1	1	Q14204	0	1460.7	High	4.31	Q
FALSE	High	IRVDVADQAQDK		1	1	2	P23588	1	1357.71	High	4.31	I
FALSE	High	ITDSAGHILYSK		1	1	3	P49755	0	1304.68	High	4.31	I
FALSE	High	QADTVYFLPITPQFVTEVIK		1	1	10	P31327	0	2309.24	High	4.31	Q
FALSE	High	QTQVSVLPEGGETPLFK		1	1	3	P06396	0	1829.96	High	4.31	Q
FALSE	High	IQHILCTGNLCTK	2xCarbamidomethyl [C6; C11]	1	1	1	Q9UBQ0	0	1557.79	High	4.31	I
FALSE	High	DEENNPLETEYGLSVYK		1	1	1	P25205	0	1999.91	High	4.3	D
FALSE	High	ILSISADIETIGEILK		1	1	15	P61978	0	1714.98	High	4.3	I
FALSE	High	VNDTIQIDLETGK		1	1	3	P62701	0	1445.75	High	4.3	V
FALSE	High	DQEGQDVLLFIDNIFR		1	1	7	P06576	0	1921.97	High	4.3	D
FALSE	High	LQVELDNVTGLLSQSDSK		1	1	2	P35579	0	1946.01	High	4.3	L
FALSE	High	LMHQAALLGQALQDSR		1	1	1	Q16881	0	1751.92	High	4.3	L
FALSE	High	MTLSNPSELDELMSEEAYEK		1	1	1	P23434	0	2316.03	High	4.3	M
FALSE	High	VQEEPELVFTLGDCDVIQALDLSVPLMDVGETAMVTADSK	1xCarbamidomethyl [C14]	1	1	1	Q14318	0	4335.1	High	4.3	V
FALSE	High	RAEISNAIDQYVTGTIGEDEDLIK		1	1	1	P31939	1	2650.32	High	4.3	R
FALSE	High	GPVFAPPYEPLPENVK		1	1	2	P11387	0	1753.92	High	4.3	G
FALSE	High	MAATFIGNSTAIQELFK	1xOxidation [M1]	0	1	13		0	1857.94	High	4.3	M
FALSE	High	ARPFPDGLAEDIDK		1	1	10	P13639	0	1543.78	High	4.3	A
FALSE	High	DEFPEVYVPTVFENYVADIEVDGK		1	1	4	P62745	0	2774.31	High	4.3	D
FALSE	High	LAQAAQSSVATITR		1	1	1	Q9Y490	0	1416.78	High	4.3	L
FALSE	High	NTGVILANDANAER		1	1	1	P46087	0	1457.73	High	4.3	N
FALSE	High	KEPEAFDWSPVVTYVCDLEGNR	1xCarbamidomethyl [C16]	1	1	1	P40261	1	2611.21	High	4.29	K
FALSE	High	VDQSILTGESVSVIK		1	2	2	P16615	0	1574.86	High	4.29	V
FALSE	High	VTEGLTDVILYHQPDDK		1	1	2	O60506	0	1942.98	High	4.29	V
FALSE	High	LVEYDIDEVVYDEDSPYQNIK		1	1	1	P52788	0	2546.18	High	4.29	L
FALSE	High	AQVEEFLAQHGSEYQSVK		1	1	1	Q02809	0	2049.99	High	4.29	A
FALSE	High	TQNPMVTGTSVLGVK		1	1	1	P28070	0	1531.81	High	4.29	T
FALSE	High	EGPYSISVLYGDEEVPR		1	1	3	P21333	0	1909.92	High	4.29	E
FALSE	High	ACALSIEESCRPGDK	2xCarbamidomethyl [C2; C10]	1	1	1	P31040	0	1692.77	High	4.29	A
FALSE	High	VFEPNEEALGVVLHK		1	1	1	O43615	0	1680.9	High	4.29	V
FALSE	High	LLVSNLDFGVSDADIQELFAEFGTLK		1	1	4	Q86V81	0	2841.46	High	4.29	L
FALSE	High	DFVSEQLTSLLVNGVQLPALGENK		1	1	3	P54136	0	2571.37	High	4.29	D
FALSE	High	IYEGQVEVTGDEYNVESIDGQPGAFTCYLDAGLAR	1xCarbamidomethyl [C27]	1	1	3	P46777	0	3836.76	High	4.29	I
FALSE	High	TDMDNQIVVSDYAQMDR		1	1	2	P50991	0	2000.87	High	4.29	T
FALSE	High	LTTLPSDFCGLTHLVK	1xCarbamidomethyl [C9]	1	1	1	Q96AG4	0	1801.95	High	4.29	L
FALSE	High	RIEPADAHVLQK		1	1	1	Q9GZZ1	1	1376.76	High	4.28	R
FALSE	High	VVNEINIEDLCLTK	1xCarbamidomethyl [C11]	1	1	1	Q8N5K1	0	1659.86	High	4.28	V
FALSE	High	QDLPNAMAISEMTDK		1	1	2	P18085	0	1663.77	High	4.28	Q
FALSE	High	AGNNMLLVGVHGPR		1	1	1	P21333	0	1434.76	High	4.28	A
FALSE	High	LVAGEMGQNEPDQGGQR		1	1	3	Q99714	0	1785.82	High	4.28	L
FALSE	High	GADFLVTEVENGGSLGSK		1	1	10	P14618	0	1779.88	High	4.28	G
FALSE	High	EIRPALELLEPIEQK		1	1	2	P50395	0	1778.01	High	4.28	E
FALSE	High	AANDAGYFNDEMAPIEVK		1	1	2	P42765	0	1954.89	High	4.28	A
FALSE	High	VEYHFLSPYVSPK		1	1	2	P02786	0	1565.8	High	4.28	V
FALSE	High	HISQISVAEDDDESLLGHLMIVGK		1	1	1	P49773	0	2606.31	High	4.28	H
FALSE	High	TDYNASVSVPDSSGPER		1	1	3	P61978	0	1780.8	High	4.28	T
FALSE	High	EEFTAFLHPEEFEHMK		1	1	2	Q15293	0	2020.91	High	4.28	E
FALSE	High	VCLEITEDGGDSIEVPGAR	1xCarbamidomethyl [C2]	1	1	2	P36952	0	2016.95	High	4.28	V
FALSE	High	ALMLQGVDLLADAVAVTMGPK	1xOxidation [M3]	1	1	5	P10809	0	2129.13	High	4.28	A
FALSE	High	DSLDPSFTHAMQLLTAEIEK		1	1	7	Q07666	0	2246.1	High	4.28	D
FALSE	High	NITDYLIEEVSAEEEELLGSSGGAPPEEPPK		1	1	1	Q9BXP5	0	3299.57	High	4.28	N
FALSE	High	IMEGPAFNFLDAPAVR		1	1	2	P11177	0	1747.88	High	4.28	I
FALSE	High	VHVGDEDFVHLR		1	1	1	P04080	0	1422.71	High	4.28	V
FALSE	High	DQGPNVCALQQILGTK	1xCarbamidomethyl [C7]	1	1	2	Q15063	0	1741.89	High	4.28	D
FALSE	High	DGSCGVAYVVQEPGDYEVSVK	1xCarbamidomethyl [C4]	1	1	3	P21333	0	2258.03	High	4.27	D
FALSE	High	ITENIGCVMTGMTADSR	1xCarbamidomethyl [C7]	1	1	2	P60900	0	1855.83	High	4.27	I
FALSE	High	VVSGMVNCNDDQGVLLGR	1xCarbamidomethyl [C8]	1	1	1	P21980	0	1932.93	High	4.27	V
FALSE	High	NPFGLVPVLENSQGQLIYESAITCEYLDEAYPGK	1xCarbamidomethyl [C24]	1	1	4	P78417	0	3814.85	High	4.27	N
FALSE	High	VLTGVAGEDAECHAAK	1xCarbamidomethyl [C12]	1	1	2	O95373	0	1627.77	High	4.27	V
FALSE	High	FFEGPVTGIFSGYVNSMLQEYAK		1	1	2	P55060	0	2584.24	High	4.27	F
FALSE	High	GPTEAVGYFLYNLIDSMSDSEVQAK		1	1	5	P42704	0	2734.29	High	4.27	G
FALSE	High	GAVVGIDLGTTNSCVAVMEGK	1xCarbamidomethyl [C14]	1	1	1	P38646	0	2078.03	High	4.27	G
FALSE	High	DTHDQLSEPSEVR		1	1	1	Q15149	0	1512.69	High	4.27	D
FALSE	High	SSGGREDLESSGLQR		1	1	1	Q9UK76	1	1577.75	High	4.27	S
FALSE	High	EIGLLSEEVELYGETK		1	1	2	P11586	0	1808.92	High	4.26	E
FALSE	High	GGGEELAQLAGVPFLGSVPLDPALMR		1	1	2	Q9Y5Y2	0	2594.36	High	4.26	G
FALSE	High	APSVANVGSHCDLSLK	1xCarbamidomethyl [C11]	1	1	1	P21333	0	1654.82	High	4.26	A
FALSE	High	SLPSVETLGCTSVICSDK	2xCarbamidomethyl [C10; C15]	1	3	1	P16615	0	1952.93	High	4.26	S
FALSE	High	QGFGELLQAVPLADSFR		1	1	4	P27695	0	1847.97	High	4.26	Q
FALSE	High	TFITSDFMTGIPATPGNEIPVEVVLK		1	1	7	P49915	0	2776.45	High	4.26	T
FALSE	High	VLTEDEMGHPEIGDAIAR		1	1	2	P14324	0	1952.94	High	4.26	V
FALSE	High	RDIQENDEEAVQVK		1	1	1	O00231	1	1672.81	High	4.26	R
FALSE	High	GLGTDEDSLIEIICSR	1xCarbamidomethyl [C14]	1	2	17	P07355	0	1777.86	High	4.26	G
FALSE	High	NYGILADATEQVGQHK		1	1	1	Q9BZZ5	0	1743.87	High	4.26	N
FALSE	High	LPVVIGGLLDVDCSEDVIK	1xCarbamidomethyl [C13]	1	1	2	Q00610	0	2041.09	High	4.26	L
FALSE	High	YSGAYGASVSDEELK		1	1	1	Q9NX63	0	1575.72	High	4.26	Y
FALSE	High	LAMQEFMILPVGAANFR		1	1	28	P06733	0	1907.99	High	4.26	L
FALSE	High	SAAPSTLDSSSTAPAQLGK		1	1	1	Q9Y5M8	0	1788.9	High	4.26	S
FALSE	High	DATNVGDEGGFAPNILENK		1	1	8	P06733	0	1960.92	High	4.26	D
FALSE	High	ENILFGMGNPLLDISAVVDK		1	1	4	P55263	0	2145.13	High	4.25	E
FALSE	High	EEGPYEVEVTYDGVPVPGSPFPLEAVAPTKPSK		1	1	1	P21333	0	3485.74	High	4.25	E
FALSE	High	MSASDPNSSIFLTDTAK		1	1	2	P23381	0	1784.84	High	4.25	M
FALSE	High	SPGVVISDDEPGYDLDLFCIPNHYAEDLER	1xCarbamidomethyl [C19]	1	1	1	P00492	0	3435.57	High	4.25	S
FALSE	High	GVVPLAGTDGETTTQGLDGLSER		1	1	4	P09972	0	2273.13	High	4.25	G
FALSE	High	THQPSDEVGTSIEHPR		1	1	2	Q99575	0	1789.85	High	4.25	T
FALSE	High	SENGLEFTSSGSANTETTK		1	1	2	P21796	0	1959.88	High	4.25	S
FALSE	High	VIPATDLSEQISTAGTEASGTGNMK		1	1	1	P06737	0	2478.2	High	4.25	V
FALSE	High	GDDLLPAGTEDYIHIR		1	2	1	P41567	0	1784.88	High	4.25	G
FALSE	High	GQAAVQQLQAEGLSPR		1	2	2	P16152	0	1652.87	High	4.25	G
FALSE	High	DLDEDELLGNLSETELK		1	1	1	Q9NYL9	0	1932.93	High	4.25	D
FALSE	High	FPSLLTHNENMVAK		1	1	4	P62906	0	1600.82	High	4.25	F
FALSE	High	VSGAQEMVSSAK		1	1	2	O60664	0	1193.58	High	4.25	V
FALSE	High	TCDISFSDPDDLLNFK	1xCarbamidomethyl [C2]	1	1	2	P61081	0	1886.85	High	4.25	T
FALSE	High	MEAVLTEELDEEEQLLR	1xAcetyl [N-Term]	1	1	2	Q8N6M0	0	2089	High	4.25	M
FALSE	High	GSDCGIVNVNIPTSGAEIGGAFGGEK	1xCarbamidomethyl [C4]	1	1	1	P49419	0	2506.19	High	4.24	G
FALSE	High	EPLFGISTGNLITGLAAGAK		1	1	2	P31327	0	1930.06	High	4.24	E
FALSE	High	EEPGSDSGTTAVVALIR		1	1	1	O15355	0	1701.87	High	4.24	E
FALSE	High	AMGIMNSFVNDIFER		2	14	41	Q16778; Q5QNW6	0	1743.82	High	4.24	A
FALSE	High	WLHNEDQMAVEK		1	1	2	P37837	0	1499.69	High	4.24	W
FALSE	High	DDPSAMDFVTSAANLR		1	1	1	Q9UBT2	0	1709.78	High	4.24	D
FALSE	High	SVTEQGAELSNEER		1	1	3	P63104	0	1548.71	High	4.24	S
FALSE	High	DMDLVEVNEAFAPQYLAVER		1	1	1	P42765	0	2309.11	High	4.24	D
FALSE	High	IGNTGGMLDNILASK		1	1	1	P53396	0	1503.78	High	4.24	I
FALSE	High	AMEGTIDGSLINPTVIVDPFQILVAANK		1	1	2	Q9Y3C4	0	2926.56	High	4.24	A
FALSE	High	KLEEEGEQFVK		1	1	1	P22307	1	1335.68	High	4.24	K
FALSE	High	MAVTFIGNSTAIQELFK		1	1	11	P07437	0	1869.98	High	4.24	M
FALSE	High	LAENFCVCHLATGDMLR	2xCarbamidomethyl [C6; C8]	1	1	1	P54819	0	2006.92	High	4.24	L
FALSE	High	VGAEDADGIDMAYR		1	1	2	P49588	0	1482.65	High	4.23	V
FALSE	High	SPDTNYLFMGDYVDR		1	2	1	P67775	0	1792.78	High	4.23	S
FALSE	High	THYSNIEANESEEVR		1	1	1	P04632	0	1777.8	High	4.23	T
FALSE	High	NATNVEQSFMTMAAEIK		1	1	1	P62820	0	1884.88	High	4.23	N
FALSE	High	APLNVQFNSPLPGDAVK		1	1	3	O75369	0	1766.94	High	4.23	A
FALSE	High	TMIELSDNENPWTIFLETVDPELAASGATLPK		1	1	1	Q93009	0	3502.73	High	4.23	T
FALSE	High	TQLASWSDPTEETGPVAGILDTETLEK		1	1	1	Q15149	0	2888.4	High	4.23	T
FALSE	High	AFLDALQNQAEASSK		1	1	2	Q12931	0	1592.79	High	4.23	A
FALSE	High	MAPVPLDDSNRPASLTK		1	1	1	Q9NYF8	0	1811.93	High	4.23	M
FALSE	High	AAVDAGFVPNDMQVGQTGK		1	1	3	P13804	0	1904.92	High	4.22	A
FALSE	High	GAGIGGLGITVEGPSESK		1	1	2	O75369	0	1628.85	High	4.22	G
FALSE	High	LAAVDATVNQVLASR		1	1	3	Q15084	0	1527.85	High	4.22	L
FALSE	High	YLPPATQVVLISATLPHEILEMTNK		1	1	7	P38919	0	2778.51	High	4.22	Y
FALSE	High	VVDNPIYLSDMGAALTGAESHELQDVLEETNIPK		1	1	3	P36776	0	3668.8	High	4.22	V
FALSE	High	FQSVPAQPGQTSPLLQYFGILLDQGQLNK		1	1	2	Q00610	0	3187.68	High	4.22	F
FALSE	High	EYCISSDDLFSLPYCPGK	2xCarbamidomethyl [C3; C15]	1	1	1	Q16881	0	2150.94	High	4.22	E
FALSE	High	CCSGAIIVLTK	2xCarbamidomethyl [C1; C2]	1	1	3	P14618	0	1221.63	High	4.21	C
FALSE	High	IFVGNVSAACTSQELR	1xCarbamidomethyl [C10]	1	1	1	Q96PK6	0	1751.87	High	4.21	I
FALSE	High	DLISHDEMFSDIYK		1	1	3	P13693	0	1712.78	High	4.21	D
FALSE	High	TGEAIVDAALSALR		1	1	6	Q15084	0	1386.76	High	4.21	T
FALSE	High	KHPDSSVNFAEFSK		1	1	1	P26583	1	1592.77	High	4.21	K
FALSE	High	VFVGGLSPDTSEEQIK		1	1	3	O14979	0	1705.86	High	4.21	V
FALSE	High	EYSSELNAPSQESDSHPR		1	1	1	P49756	0	2032.88	High	4.21	E
FALSE	High	VSLDPELEEALTSASDTELCDLAAILGMHNLITNTK	1xCarbamidomethyl [C20]	1	1	2	Q9NYL9	0	3884.91	High	4.21	V
FALSE	High	IQPSGGTNINEALLR		1	1	5	P19823	0	1582.85	High	4.21	I
FALSE	High	SEAVGMSNQTDLLALGTAVGSILLYSTVK		1	1	2	Q15061	0	2938.54	High	4.21	S
FALSE	High	QITDNIFLTTAEVIAQQVSDK		1	1	1	P48163	0	2334.22	High	4.21	Q
FALSE	High	VESVFETLVEDSAEEESTLTK		1	1	2	Q9Y4L1	0	2342.11	High	4.21	V
FALSE	High	VDATEESDLAQQYGVR		1	1	3	P07237	0	1780.83	High	4.21	V
FALSE	High	HYEVEILDAK		1	1	1	Q9NZ01	0	1216.62	High	4.21	H
FALSE	High	NIELICQENEGENDPVLQR	1xCarbamidomethyl [C6]	1	1	1	Q15691	0	2270.07	High	4.2	N
FALSE	High	LAPPLVTLLSAEPELQYVALR		1	1	2	Q10567	0	2293.32	High	4.2	L
FALSE	High	DLEAEHVEVEDTTLNR		1	1	1	Q9H3K6	0	1869.88	High	4.2	D
FALSE	High	LATQLTGPVMPVR		1	1	2	P26373	0	1382.78	High	4.2	L
FALSE	High	HGEIDYEAIVK		1	1	1	P62333	0	1273.64	High	4.2	H
FALSE	High	FEIGEGENLDLPYGLER		1	1	1	Q02790	0	1950.94	High	4.2	F
FALSE	High	NLSFDSEEEELGELLQQFGELK		1	1	4	Q9NW13	0	2554.22	High	4.2	N
FALSE	High	AMGIMNSFVNDIFER	1xOxidation [M]	2	14	22	Q16778; Q5QNW6	0	1759.81	High	4.2	A
FALSE	High	ALPAVQQNNLDEDLIRK		1	1	1	P22314	1	1937.05	High	4.2	A
FALSE	High	SLPEEDVAEIQHAEEFLIKPESK		1	1	1	O60832	0	2638.32	High	4.2	S
FALSE	High	GEMMDLQHGSLFLR		1	1	5	P00338	0	1633.78	High	4.2	G
FALSE	High	KSDVEAIFSK		1	4	3	P07910	1	1123.6	High	4.2	K
FALSE	High	NADTLPDQEELIQSATETIGSFLDSTSPLLAIAACTALGEIGR	1xCarbamidomethyl [C35]	1	1	1	Q5VYK3	0	4489.23	High	4.2	N
FALSE	High	HVGNQQYNVTYVVK		1	1	3	O75369	0	1648.84	High	4.2	H
FALSE	High	SQETECTYFSTPLLLGK	1xCarbamidomethyl [C6]	1	1	3	P40926	0	1973.95	High	4.19	S
FALSE	High	AAYLQETGKPLDETLK		1	1	5	P04083	0	1776.94	High	4.19	A
FALSE	High	GYIWNYGAIPQTWEDPGHNDK		1	1	1	Q15181	0	2461.12	High	4.19	G
FALSE	High	AVEVQGPSLESGDHGK		1	1	1	Q09666	0	1609.78	High	4.19	A
FALSE	High	ELDLSNNCLGDAGILQLVESVR	1xCarbamidomethyl [C8]	1	1	2	P13489	0	2415.22	High	4.19	E
FALSE	High	EITGIGPSTTTETETIAK		1	1	2	O75436	0	1848.94	High	4.19	E
FALSE	High	GPSGCVESLEVTCR	2xCarbamidomethyl [C5; C13]	1	1	1	P47897	0	1550.69	High	4.19	G
FALSE	High	VTDETSGCSLTCAQFHPDGLIFGTGTMDSQIK	2xCarbamidomethyl [C8; C12]	1	1	1	Q9UMS4	0	3473.57	High	4.19	V
FALSE	High	IKDPDASKPEDWDER		1	1	5	P27797	1	1800.84	High	4.19	I
FALSE	High	IINEPTAAAIAYGLDR		1	2	6	P0DMV9	0	1687.9	High	4.19	I
FALSE	High	IEELDQENEAALENGIK		1	1	1	P43243	0	1914.93	High	4.19	I
FALSE	High	QMQLENVSVALEFLDR		2	2	3	P21333; O75369	0	1891.96	High	4.18	Q
FALSE	High	LSLDGQNIYNACCTLR	2xCarbamidomethyl [C12; C13]	1	1	2	P26599	0	1897.89	High	4.18	L
FALSE	High	TIGGGDDSFNTFFSETGAGK		2	5	15	Q71U36; Q9BQE3	0	2007.89	High	4.18	T
FALSE	High	SSGPTSLFAVTVAPPGAR		1	1	6	Q00839	0	1714.91	High	4.18	S
FALSE	High	DLADELALVDVIEDK		1	1	24	P00338	0	1657.85	High	4.18	D
FALSE	High	GFIGPGIDVPAPDMSTGER		1	1	1	P00367	0	1915.92	High	4.18	G
FALSE	High	AVCMLSNTTAVAEAWAR	1xCarbamidomethyl [C3]	1	1	3	Q9BQE3	0	1850.89	High	4.18	A
FALSE	High	LLLGPNGPAVAAAGDLTSEEEEGQSLWSSILSEVSTR		1	1	1	O43237	0	3783.89	High	4.18	L
FALSE	High	DDPLTNLNTAFDVAEK		1	1	2	P12814	0	1762.85	High	4.18	D
FALSE	High	LDQEMEQLNHHTTTR		1	1	1	Q92878	0	1852.86	High	4.18	L
FALSE	High	NAPAIIFIDELDAIAPK		1	1	13	P55072	0	1810.99	High	4.18	N
FALSE	High	TDASSASSFLDSDELER		1	1	1	Q14498	0	1829.8	High	4.17	T
FALSE	High	ISEACSLAQQSGDHR	1xCarbamidomethyl [C5]	1	1	1	P52948	0	1658.76	High	4.17	I
FALSE	High	VNIVFNYDMPEDSDTYLHR		1	1	1	O00148	0	2328.06	High	4.17	V
FALSE	High	SQNVMAAASIANIVK		1	1	2	P17987	0	1516.82	High	4.17	S
FALSE	High	EDVGTVVGIDLGTTYSCVGVFK	1xCarbamidomethyl [C17]	1	1	2	P11021	0	2316.14	High	4.17	E
FALSE	High	DNNPVVVLENELMYGVPFEFPPEAQSK		1	1	6	P11177	0	3062.48	High	4.17	D
FALSE	High	HQGVMVGMGQK		2	7	1	P60709; P68133	0	1171.57	High	4.17	H
FALSE	High	VSASPLLYTLIEK		1	1	3	P02786	0	1433.83	High	4.17	V
FALSE	High	YADLTEDQLPSCESLK	1xCarbamidomethyl [C12]	1	1	5	P18669	0	1868.86	High	4.17	Y
FALSE	High	EHDPVGQMVNNPK		1	1	3	P55060	0	1464.69	High	4.17	E
FALSE	High	LTPLPEDNSMNVDQDGDPSDR		1	1	2	P78527	0	2315.01	High	4.17	L
FALSE	High	VGGTSDVEVNEK		1	1	1	P10809	0	1233.6	High	4.17	V
FALSE	High	VMTIPYQPMPASSPVICAGGQDR	1xCarbamidomethyl [C17]	1	1	1	Q15365	0	2475.18	High	4.17	V
FALSE	High	SQDAEVGDGTTSVTLLAAEFLK		1	1	2	Q99832	0	2252.13	High	4.17	S
FALSE	High	AGGIETIANEYSDR		1	1	2	P34932	0	1495.7	High	4.16	A
FALSE	High	DLLSDWLDSTLGCDVTDNSIFSK	1xCarbamidomethyl [C13]	1	1	3	P49589	0	2601.2	High	4.16	D
FALSE	High	MQYAPNTQVEILPQGHESPIFK		1	1	1	P40121	0	2527.26	High	4.16	M
FALSE	High	YVASYLLAALGGNSSPSAK		1	1	1	P05387	0	1868.98	High	4.16	Y
FALSE	High	GAEAANVTGPGGVPVQGSK		1	1	2	P67809	0	1695.87	High	4.16	G
FALSE	High	IAQDLEMYGVNYFSIK		1	1	1	P26038	0	1890.93	High	4.16	I
FALSE	High	ELDALDANDELTPLGR		1	1	2	Q08211	0	1741.86	High	4.16	E
FALSE	High	QGGGGGGGSVPGIER		1	1	2	P52272	0	1284.63	High	4.16	Q
FALSE	High	EDDPGEAASMSMFSDFLQSFLK		1	1	1	P57740	0	2452.07	High	4.16	E
FALSE	High	GNLGAGNGNLQGPR		1	1	1	P43243	0	1324.67	High	4.16	G
FALSE	High	GTDSQAMEEEKPEGHV		1	1	1	Q13451	0	1743.75	High	4.16	G
FALSE	High	GEDVPLTEQTVSQVLQSAK		1	1	1	P61923	0	2029.04	High	4.16	G
FALSE	High	IVEFLQSFDEITAMTGDGVNDAPALK		1	1	3	P16615	0	2781.37	High	4.16	I
FALSE	High	FHMVDGNVSGEFTDLVPEK		1	1	1	O95433	0	2121	High	4.16	F
FALSE	High	FSHEEIAMATVTALR		1	1	5	P04075	0	1675.85	High	4.15	F
FALSE	High	LVINGNPITIFQERDPSK		1	1	1	P04406	1	2041.11	High	4.15	L
FALSE	High	DHASIQMNVAEVDK		1	1	3	P63220	0	1556.74	High	4.15	D
FALSE	High	LLGASELPIVTPALR		1	1	1	P52292	0	1549.93	High	4.15	L
FALSE	High	VLGTPVETIELTEDRR		1	1	1	P27708	1	1827.98	High	4.15	V
FALSE	High	DPYTGQQISLFQAMQK		1	1	1	Q15149	0	1854.91	High	4.15	D
FALSE	High	AQQEQELAADAFK		1	1	3	P14314	0	1448.7	High	4.15	A
FALSE	High	MEVVEAAAAQLETLK	1xAcetyl [N-Term]	1	1	3	Q96HR8	0	1644.85	High	4.15	M
FALSE	High	DAYSGGAVNLYHVR		1	1	2	P28074	0	1521.74	High	4.15	D
FALSE	High	HAPINSAQHLDNVDQTGPK		1	1	1	O43159	0	2042	High	4.15	H
FALSE	High	TALALAIAQELGSK		1	1	1	Q9Y265	0	1385.8	High	4.15	T
FALSE	High	ITPAHDQNDYEVGQR		1	1	1	P26640	0	1742.81	High	4.15	I
FALSE	High	DLPSQLAEIGAAAQQSLGEAIDVYQASVGFVCESPTEQVLPMLR	1xCarbamidomethyl [C32]	1	1	1	Q96JB5	0	4688.32	High	4.15	D
FALSE	High	HNPTVTGHQEQTYLQK		1	1	2	Q71RC2	0	1880.92	High	4.15	H
FALSE	High	SGAQASSTPLSPTR		1	1	2	P02545	0	1359.69	High	4.15	S
FALSE	High	TDMIQALGGVEGILEHTLFK		1	1	2	Q6P2Q9	0	2172.14	High	4.15	T
FALSE	High	TDAPQPDVKEEEEEK		1	1	1	P27824	1	1743.79	High	4.15	T
FALSE	High	VLAGETLSVNDPPDVLDR		1	1	4	Q12906	0	1909.99	High	4.15	V
FALSE	High	DYLHLPPEIVPATLR		1	1	14	P46783	0	1733.96	High	4.15	D
FALSE	High	VDQIQEIVTGNPTVIK		1	1	2	P46940	0	1753.97	High	4.15	V
FALSE	High	RTEMENEFVLIK		1	1	4	P05787	1	1508.78	High	4.15	R
FALSE	High	TIDGQQTIIACIESHQFQPK	1xCarbamidomethyl [C11]	1	1	2	P52907	0	2314.15	High	4.14	T
FALSE	High	MELQPPEASIAVVSIPR	1xAcetyl [N-Term]	1	1	1	P08195	0	1879	High	4.14	M
FALSE	High	TVDFTQDSNYLLTGGQDK		1	1	1	Q9Y3F4	0	2001.94	High	4.14	T
FALSE	High	HSQFIGYPITLYLEK		1	3	34	P08238	0	1808.96	High	4.14	H
FALSE	High	QAFDDAIAELDTLNEDSYK		1	1	1	Q04917	0	2157.98	High	4.14	Q
FALSE	High	GEDEAELALSLLAQLGITPLPLSR		1	1	1	Q66K74	0	2506.38	High	4.14	G
FALSE	High	NPFGNAGLLLGEAGK		1	1	1	P49748	0	1457.77	High	4.14	N
FALSE	High	VDINAPDVGVQGPDWHLK		1	1	1	Q09666	0	1959.99	High	4.14	V
FALSE	High	SGGASHSELIHNLR		1	1	1	P22061	0	1477.75	High	4.14	S
FALSE	High	EITAIESSVPCQLLESVLQELK	1xCarbamidomethyl [C11]	1	1	5	O75694	0	2486.31	High	4.14	E
FALSE	High	ILADLEDYLNELWEDK		1	2	3	B5ME19	0	1978.96	High	4.14	I
FALSE	High	DFTVSAMHGDMDQK		1	1	4	P60842	0	1581.67	High	4.14	D
FALSE	High	ASFANEDGQVSPGSLLLAGAIAGMPAASLVTPADVIK		1	1	2	Q9UJS0	0	3538.85	High	4.13	A
FALSE	High	AAHSEGNTTAGLDMR		1	1	1	P78371	0	1530.7	High	4.13	A
FALSE	High	APNTPDILEIEFKK		1	1	1	P00966	1	1614.87	High	4.13	A
FALSE	High	TGENVEDAFLEAAK		1	1	2	P61106	0	1493.71	High	4.13	T
FALSE	High	EIYPYVIQELRPTLNELGISTPEELGLDKV		1	1	4	P20674	1	3428.82	High	4.13	E
FALSE	High	GSYGDLGGPIITTQVTIPK		1	1	5	P61978	0	1917.03	High	4.13	G
FALSE	High	SNASTLESHETEEPAAK		1	1	1	Q9UJA5	0	1800.82	High	4.13	S
FALSE	High	DTVTISGPQAPVFEFVEQLR		1	1	3	P49327	0	2233.15	High	4.13	D
FALSE	High	LALSQNQQSSGAAGPTGK		1	1	1	O95232	0	1714.87	High	4.13	L
FALSE	High	GDVSNLDPNFSFEGTK		1	1	2	Q01650	0	1726.79	High	4.13	G
FALSE	High	QLLQANPILEAFGNAK		1	3	2	P35579	0	1726.95	High	4.13	Q
FALSE	High	VNGRPLEMIEPR		1	1	2	P62249	0	1410.75	High	4.13	V
FALSE	High	SDIGEVILVGGMTR		1	1	3	P38646	0	1446.76	High	4.13	S
FALSE	High	QQSEEDLLLQDFSR		1	1	2	Q9UNL2	0	1707.82	High	4.13	Q
FALSE	High	FVIHCNSPVWGADK	1xCarbamidomethyl [C5]	1	1	1	O75367	0	1629.78	High	4.13	F
FALSE	High	TDHPEIGEGKPTPALSEEASSSSIR		1	1	1	Q16891	0	2595.25	High	4.12	T
FALSE	High	TASNVEEAFINTAK		1	1	1	P61019	0	1494.74	High	4.12	T
FALSE	High	SSSPAPADIAQTVQEDLR		1	1	2	Q13283	0	1884.93	High	4.12	S
FALSE	High	DAFQNAYLELGGLGER		1	1	1	P05023	0	1752.86	High	4.12	D
FALSE	High	QSLGHPPPEPGPDR		1	1	1	P13861	0	1483.73	High	4.12	Q
FALSE	High	HWPFQVINDGDKPK		1	1	4	P0DMV9	0	1680.85	High	4.12	H
FALSE	High	LGESQTLQQFSR		1	1	1	Q13813	0	1393.71	High	4.12	L
FALSE	High	VPQVSTPTLVEVSR		1	1	5	P02768	0	1511.84	High	4.12	V
FALSE	High	LLMSEDYFTQAMEVK		1	1	1	P42704	0	1804.85	High	4.12	L
FALSE	High	QSGEAFVELGSEDDVK		1	1	2	P52597	0	1709.79	High	4.12	Q
FALSE	High	TQEQLALEMAELTAR		1	1	3	P26038	0	1703.86	High	4.12	T
FALSE	High	DGSCSAEYIPFAPGDYDVNITYGGAHIPGSPFR	1xCarbamidomethyl [C4]	1	1	1	O75369	0	3530.6	High	4.12	D
FALSE	High	VSYGIGDEEHDQEGR		1	1	2	P27695	0	1690.73	High	4.12	V
FALSE	High	SLGYAYVNFQQPADAER		2	2	2	Q13310; P11940	0	1928.91	High	4.12	S
FALSE	High	IDVCPENAEVTLTDFR	1xCarbamidomethyl [C4]	1	2	1	P35443	0	1878.89	High	4.12	I
FALSE	High	AFGAAGETIVIEELLDGEEVSCLCFTDGK	2xCarbamidomethyl [C22; C24]	1	1	1	P22102	0	3130.46	High	4.12	A
FALSE	High	MSGGWELELNGTEAK		1	1	2	Q07021	0	1621.75	High	4.12	M
FALSE	High	TSAADLVTETDHLVEDLIISELR		1	1	4	O14732	0	2540.31	High	4.12	T
FALSE	High	IEGDMIVCAAYAHELPK	1xCarbamidomethyl [C8]	1	1	2	P46777	0	1916.92	High	4.12	I
FALSE	High	EDVFVHQTAIK		2	3	3	P16989; P67809	0	1286.67	High	4.11	E
FALSE	High	VQVQDNEGCPVEALVK	1xCarbamidomethyl [C9]	1	1	2	P21333	0	1784.88	High	4.11	V
FALSE	High	FSVCVLGDQQHCDEAK	2xCarbamidomethyl [C4; C12]	1	1	5	P62906	0	1892.83	High	4.11	F
FALSE	High	SSILLDVKPWDDETDMAK		1	1	4	P24534	0	2063	High	4.11	S
FALSE	High	AVTEQGAELSNEER		1	1	3	P27348	0	1532.72	High	4.11	A
FALSE	High	EAYMGNVLQGGEGQAPTR		1	1	1	P24752	0	1877.88	High	4.11	E
FALSE	High	NQVAMNPTNTVFDAK		1	1	3	P11142	0	1649.8	High	4.11	N
FALSE	High	ELAQIAGRPTEDEDEK		1	1	1	O15355	0	1800.86	High	4.11	E
FALSE	High	ANLQIDQINTDLNLER		1	1	2	P35579	0	1869.97	High	4.11	A
FALSE	High	ASGQAFELILSPR		1	1	2	P16949	0	1388.75	High	4.11	A
FALSE	High	SAALPIFSSFVSNWDEATK		1	1	7	O76021	0	2070.02	High	4.11	S
FALSE	High	LQEAGILSAEELQR		1	1	2	Q15149	0	1556.83	High	4.11	L
FALSE	High	VGNLGLATSFFNER		1	1	1	O00571	0	1524.78	High	4.11	V
FALSE	High	LPETNLFETEETRK		1	1	2	Q15046	1	1706.86	High	4.1	L
FALSE	High	EATNPPVIQEEKPK		1	1	3	P30101	0	1579.83	High	4.1	E
FALSE	High	KTTHFVEGGDAGNREDQINR		1	1	1	P18124	2	2244.08	High	4.1	K
FALSE	High	TLMVDPSQEVQENYNFLLQLQEELLK		1	1	5	Q9Y5B9	0	3121.58	High	4.1	T
FALSE	High	VAHSFNCTPIEGMLSHQLK	1xCarbamidomethyl [C7]	1	1	1	Q9UQ80	0	2169.06	High	4.1	V
FALSE	High	LEPQIASASEYAHR		1	1	2	O60664	0	1571.78	High	4.1	L
FALSE	High	VTHAVVTVPAYFNDAQR		1	1	5	P11021	0	1887.97	High	4.1	V
FALSE	High	EEILANGGSLSHHHGVGK		1	1	2	O00116	0	1841.93	High	4.1	E
FALSE	High	LEEMINELAVAMTAVK		1	1	2	Q15363	0	1761.91	High	4.1	L
FALSE	High	EATTDFTVDSRPLTQVGGDHIK		1	1	1	O75369	0	2387.18	High	4.1	E
FALSE	High	GMYGIENEVFLSLPCILNAR	1xCarbamidomethyl [C15]	1	1	9	P07195	0	2296.15	High	4.1	G
FALSE	High	ENIVEAIIHSPELIR		1	1	1	O95373	0	1732.96	High	4.1	E
FALSE	High	AQHVFQHAVPQEGKPITNQK		1	1	1	Q13867	0	2257.18	High	4.1	A
FALSE	High	NSLESYAFNMK		1	1	3	P11142	0	1303.6	High	4.1	N
FALSE	High	MTELETAMGMIIDVFSR	1xAcetyl [N-Term]	1	1	1	P25815	0	1985.94	High	4.1	M
FALSE	High	DPNNLLNDWSQK		1	1	1	O00232	0	1443.69	High	4.1	D
FALSE	High	SIEIPRPVDGVEVPGCGK	1xCarbamidomethyl [C16]	1	1	1	P26368	0	1908.98	High	4.1	S
FALSE	High	DGELPVEDDIDLSDVELDDLGK		1	1	1	Q15084	0	2401.11	High	4.1	D
FALSE	High	NQYDNDVTVWSPQGR		1	1	2	P25786	0	1778.81	High	4.09	N
FALSE	High	YIAENGTDPINNQPLSEEQLIDIK		1	1	1	Q9UMS4	0	2714.35	High	4.09	Y
FALSE	High	MISAAQLLDELMGR	1xAcetyl [N-Term]	1	1	1	O95232	0	1589.8	High	4.09	M
FALSE	High	NCLTNFHGMDLTR	1xCarbamidomethyl [C2]	1	1	4	P61247	0	1578.72	High	4.09	N
FALSE	High	TVVVNCNPETVSTDFDECDK	2xCarbamidomethyl [C6; C18]	1	1	4	P31327	0	2329	High	4.09	T
FALSE	High	VDFPQDQLTALTGR		1	1	4	P40926	0	1560.8	High	4.09	V
FALSE	High	VEQLGAEGNVEESQK		1	1	1	Q9Y383	0	1616.78	High	4.09	V
FALSE	High	ILLANFLAQTEALMR		1	1	6	P06744	0	1703.95	High	4.09	I
FALSE	High	VMLGETNPADSKPGTIR		2	3	4	P15531; P22392	0	1785.92	High	4.09	V
FALSE	High	GLVYETSVLDPDEGIR		1	1	3	O75390	0	1762.89	High	4.09	G
FALSE	High	YITSLNEDSTVHGFLVQLPLDSENSINTEEVINAIAPEK		1	1	5	P11586	0	4300.15	High	4.09	Y
FALSE	High	FGYVDFESAEDLEK		1	1	4	P19338	0	1648.74	High	4.09	F
FALSE	High	TIRPMDMETIEASVMK		1	1	1	P11177	0	1851.9	High	4.09	T
FALSE	High	QATTIIADNIIFLSDQTK		1	1	1	Q04837	0	1992.06	High	4.09	Q
FALSE	High	DVQDSLTVSNEAQTAK		1	1	1	P52907	0	1705.82	High	4.09	D
FALSE	High	AHGGYSVFAGVGER		1	1	2	P06576	0	1406.68	High	4.09	A
FALSE	High	QYYIGDIHPSDLKPESGSK		1	1	2	O43169	0	2134.05	High	4.09	Q
FALSE	High	SLADELALVDVLEDK		1	1	12	P07195	0	1629.86	High	4.08	S
FALSE	High	MEAVLNELVSVEDLLK	1xAcetyl [N-Term]	1	1	2	Q9Y3D6	0	1843.97	High	4.08	M
FALSE	High	LLPQLTYLDGYDRDDK		1	1	3	P39687	1	1924.97	High	4.08	L
FALSE	High	LQGQLEQGDDTAAER		1	1	1	Q8NE71	0	1630.77	High	4.08	L
FALSE	High	LNLEAINYMAADGDFK		1	1	2	P09382	0	1784.85	High	4.08	L
FALSE	High	TPGRPTSSQSYEQNIK		1	1	1	O60573	0	1792.88	High	4.08	T
FALSE	High	VYCLLGDGELSEGSVWEAMAFASIYK	1xCarbamidomethyl [C3]	1	1	1	P29401	0	2895.36	High	4.08	V
FALSE	High	QVELALWDTAGQEDYDR		3	3	2	P08134; P62745; P61586	0	2008.92	High	4.08	Q
FALSE	High	VTEDENDEPIEIPSEDDGTVLLSTVTAQFPGACGLR	1xCarbamidomethyl [C33]	1	1	3	Q13148	0	3874.82	High	4.08	V
FALSE	High	DSVNPGVMVLLGCGALSSTCGQLASYPLALVR	2xCarbamidomethyl [C13; C20]	1	1	1	Q6NUK1	0	3305.67	High	4.08	D
FALSE	High	LELSDNIISGGLEVLAEK		1	1	2	Q9BTT0	0	1900.03	High	4.08	L
FALSE	High	SESELIDELSEDFDR		1	1	1	P20810	0	1783.79	High	4.08	S
FALSE	High	IEQLCSGAAYCQFMDMLFPGSIALK	2xCarbamidomethyl [C5; C11]	1	1	2	Q15691	0	2850.33	High	4.08	I
FALSE	High	KYEEIDNAPEER		1	1	2	P49411	1	1492.69	High	4.07	K
FALSE	High	DQMQQQLNDYEQLLDVK		1	1	2	P20700	0	2108	High	4.07	D
FALSE	High	LAAAVSNFGYDLYR		1	1	2	P36955	0	1559.79	High	4.07	L
FALSE	High	TEGLSVLSQAMAVIK		1	1	1	P05198	0	1546.85	High	4.07	T
FALSE	High	CTGGEVGATSALAPK	1xCarbamidomethyl [C1]	1	1	3	P30050	0	1418.69	High	4.07	C
FALSE	High	LDSVESVLPYEYTAFDFCQASEGK	1xCarbamidomethyl [C18]	1	1	1	Q99805	0	2755.24	High	4.07	L
FALSE	High	LEGLTDEINFLR		1	1	21	P05787	0	1419.75	High	4.07	L
FALSE	High	ADEDPIMGFHQMFLLK		1	1	2	P61970	0	1891.91	High	4.07	A
FALSE	High	SPASDTYIVFGEAK		1	2	4	Q13765	0	1484.73	High	4.07	S
FALSE	High	TPVEPEVAIHR		1	1	4	P60866	0	1247.67	High	4.07	T
FALSE	High	ENFIPTIVNFSAEEISDAIR		1	1	2	Q14204	0	2265.14	High	4.07	E
FALSE	High	TANEGGSLLYEQLGYK		1	1	2	Q96QD8	0	1742.86	High	4.07	T
FALSE	High	ISNRPAFMPSEGK		1	2	4	O43707	0	1433.72	High	4.07	I
FALSE	High	YNEQHVPGSPFTAR		1	1	3	P21333	0	1602.77	High	4.07	Y
FALSE	High	WVTTASLLDYDTVAGADK		1	1	1	Q15393	0	1925.95	High	4.07	W
FALSE	High	YINENLIVNTDELGR		1	1	2	P17987	0	1762.9	High	4.07	Y
FALSE	High	GFQEVVTPNIFNSR		1	1	2	P26639	0	1607.82	High	4.07	G
FALSE	High	AGGAAVVITEPEHTK		1	1	3	Q9P258	0	1479.78	High	4.07	A
FALSE	High	DCGATWVVLGHSER	1xCarbamidomethyl [C2]	1	1	4	P60174	0	1586.74	High	4.06	D
FALSE	High	RISGLIYEETR		1	1	8	P62805	1	1336.72	High	4.06	R
FALSE	High	ALDIAENEMPGLMR		1	1	2	P23526	0	1559.76	High	4.06	A
FALSE	High	SSYDVFQLEFNDGAYNIK		1	1	1	Q16658	0	2109.98	High	4.06	S
FALSE	High	SSQSSSQQFSGIGR		1	1	2	Q92841	0	1455.68	High	4.06	S
FALSE	High	GLAITFVSDENDAK		2	2	2	O00148; Q13838	0	1479.73	High	4.06	G
FALSE	High	IDNDGDGFVTTEELK		1	1	2	Q15293	0	1652.76	High	4.06	I
FALSE	High	VCNFLASQVPFPSR	1xCarbamidomethyl [C2]	1	1	3	Q99714	0	1621.82	High	4.06	V
FALSE	High	QDIFQEQLAAIPEFLNIGPLFK		1	1	1	Q9UBF2	0	2531.35	High	4.06	Q
FALSE	High	YLNTNPVGGLLEYAR		1	1	1	P55265	0	1679.88	High	4.06	Y
FALSE	High	KFESQDTVALLEAILDGIVDPVDSTLR		1	1	1	P78527	1	2944.55	High	4.06	K
FALSE	High	EVGNYAAVESEEFLAFPAYLLGINQDR		1	1	2	Q12965	0	3015.47	High	4.06	E
FALSE	High	GQYISPFHDIPIYADK		1	1	3	Q15181	0	1863.93	High	4.06	G
FALSE	High	FVDGLMIHSGDPVNYYVDTAVR		1	1	1	P23396	0	2468.19	High	4.06	F
FALSE	High	GAVAEDGDELRTEPEAK		1	1	1	P27695	1	1786.85	High	4.06	G
FALSE	High	NSTGSQDGPVSNPSSSNSSQDSLHK		1	1	1	Q13136	0	2517.11	High	4.06	N
FALSE	High	MTLADDVTLDDLIMAK		1	1	1	P62191	0	1764.88	High	4.06	M
FALSE	High	GNAGQSNYGFANSAMER		1	1	1	P49327	0	1773.76	High	4.06	G
FALSE	High	SDPGLLTNTMDVFVK		1	1	2	P78527	0	1636.83	High	4.06	S
FALSE	High	ISTEVGITNVDLSTVDK		1	1	1	P04844	0	1790.94	High	4.05	I
FALSE	High	AQAEAQQPTFDALRDELR		1	1	1	Q15149	1	2059.02	High	4.05	A
FALSE	High	IGYNPDTVAFVPISGWNGDNMLEPSANMPWFK	1xOxidation [M]	1	2	4	P68104	0	3583.67	High	4.05	I
FALSE	High	DMIILPEMVGSMVGVYNGK		1	1	13	P62841	0	2053.02	High	4.05	D
FALSE	High	ETTDTDTADQVIASFK		1	1	2	O43707	0	1741.81	High	4.05	E
FALSE	High	IVAPISDSPKPPPQR		1	1	1	O95336	0	1601.9	High	4.05	I
FALSE	High	LESEHPDQAQAILSR		1	1	1	Q01082	0	1693.85	High	4.05	L
FALSE	High	SGCIVNNLAEFTVDPK	1xCarbamidomethyl [C3]	1	1	3	O75369	0	1763.86	High	4.05	S
FALSE	High	LYGPSSVSFADDFVR		1	1	2	P50454	0	1659.8	High	4.05	L
FALSE	High	AITIAGVPQSVTECVK	1xCarbamidomethyl [C14]	1	1	3	Q15365	0	1672.89	High	4.05	A
FALSE	High	DFIDSLGLLHEQNMAK		1	1	1	Q7L2H7	0	1830.91	High	4.05	D
FALSE	High	EGQEIASVSDDHTCR	1xCarbamidomethyl [C14]	1	1	1	Q8NFH4	0	1703.73	High	4.05	E
FALSE	High	DLNHVCVISETGK	1xCarbamidomethyl [C6]	1	1	2	P00492	0	1471.72	High	4.05	D
FALSE	High	TFTDCFNCLPIAAIVDEK	2xCarbamidomethyl [C5; C8]	2	3	5	P62136; P62140	0	2113.99	High	4.05	T
FALSE	High	EENGVLVLNDANFDNFVADK		1	1	1	P13667	0	2223.06	High	4.05	E
FALSE	High	NVIIWGNHSSTQYPDVNHAK		1	1	1	P40925	0	2280.12	High	4.05	N
FALSE	High	ELDQWIEQLNECK	1xCarbamidomethyl [C12]	1	1	2	P67775	0	1704.79	High	4.04	E
FALSE	High	ENIMDDDEGEVVEYVDDLLELEETS		1	1	1	O75718	0	2900.24	High	4.04	E
FALSE	High	GEVTEMFSYEESNPK		1	1	1	Q8TCT9	0	1746.75	High	4.04	G
FALSE	High	VIISAPSADAPMFVMGVNHEK	1xOxidation [M]	1	1	6	P04406	0	2229.1	High	4.04	V
FALSE	High	YLEVSEPQDIECCGALEYYDK	2xCarbamidomethyl [C12; C13]	1	1	2	O15371	0	2581.11	High	4.04	Y
FALSE	High	ISIPVDISDSDMMLNIINSSITTK		1	1	8	P49368	0	2607.33	High	4.04	I
FALSE	High	DFNHINVELSLLGK		1	1	3	P32969	0	1598.85	High	4.04	D
FALSE	High	FTPGTFTNQIQAAFR		1	1	2	P08865	0	1698.86	High	4.04	F
FALSE	High	TDIQIALPSGCYGR	1xCarbamidomethyl [C11]	1	1	3	P33316	0	1550.76	High	4.04	T
FALSE	High	KDDEENYLDLFSHK		1	1	1	Q07666	1	1752.81	High	4.04	K
FALSE	High	FDTLCDLYDTLTITQAVIFCNTK	2xCarbamidomethyl [C5; C20]	1	1	3	P38919	0	2752.32	High	4.04	F
FALSE	High	SPLIIFSDCDMNNAVK	1xCarbamidomethyl [C9]	1	1	1	P49189	0	1823.87	High	4.04	S
FALSE	High	SEDFGVNEDLADSDAR		1	1	3	P04083	0	1739.74	High	4.04	S
FALSE	High	AVFVDLEPTVIDEIR		1	1	3	P68366	0	1715.92	High	4.04	A
FALSE	High	TCGFDFTGAVEDISK	1xCarbamidomethyl [C2]	1	1	2	P00505	0	1646.74	High	4.04	T
FALSE	High	DDGISFSNQTGPAWAGSER		1	1	2	P20042	0	1994.88	High	4.03	D
FALSE	High	IPAFLNVVDIAGLVK		1	1	3	Q9NTK5	0	1568.94	High	4.03	I
FALSE	High	QNLFQEAEEFLYR		1	1	2	Q9UL46	0	1686.81	High	4.03	Q
FALSE	High	NPEQVDLYQFMAK		1	1	1	P56192	0	1582.76	High	4.03	N
FALSE	High	AQIHDLVLVGGSTR		1	1	5	P0DMV9	0	1465.81	High	4.03	A
FALSE	High	SLVEASSSGVSVLSLCEK	1xCarbamidomethyl [C16]	1	1	1	Q9UQ80	0	1851.94	High	4.03	S
FALSE	High	SVDETTQAMAFDGIIFQGQSLK		1	1	1	P26368	0	2386.16	High	4.03	S
FALSE	High	HELLQPFNVLYEK		1	1	4	Q9UQ80	0	1629.86	High	4.03	H
FALSE	High	GILEEPLPSTSSEEEDPLAGISLPEGVDPSFLAALPDDIR		1	1	1	Q7Z6Z7	0	4176.08	High	4.03	G
FALSE	High	DFLDGVYAFEYYPSTPGR		1	1	1	O75369	0	2096.96	High	4.03	D
FALSE	High	LGDVYVNDAFGTAHR		1	2	4	P00558	0	1634.79	High	4.03	L
FALSE	High	AVCMLSNTTAIAEAWAR	1xCarbamidomethyl [C3]	2	6	5	Q71U36; P68366	0	1864.9	High	4.03	A
FALSE	High	YSNSALGHVNCTIK	1xCarbamidomethyl [C11]	1	1	2	Q9NQC3	0	1563.76	High	4.03	Y
FALSE	High	ILAIGLINEALDEGDAQK		1	1	4	P46940	0	1883.01	High	4.03	I
FALSE	High	DAEGILEDLQSYR		1	1	1	Q9NUQ9	0	1508.72	High	4.03	D
FALSE	High	GEELGGGQDPVQLLSGFPR		1	1	2	Q04323	0	1955.98	High	4.03	G
FALSE	High	QVQSLTCEVDALK	1xCarbamidomethyl [C7]	1	1	3	P08670	0	1490.75	High	4.03	Q
FALSE	High	NAEPLINLDVNNPDFK		1	1	2	Q9Y224	0	1812.91	High	4.03	N
FALSE	High	LVSQDNFGFDLPAVEAATK		1	1	1	Q01082	0	2022.02	High	4.03	L
FALSE	High	LTDQLPLIIVCDR	1xCarbamidomethyl [C11]	1	2	2	Q00610	0	1555.85	High	4.02	L
FALSE	High	DVPFGFQTVTSDVNK		1	1	4	P36952	0	1653.81	High	4.02	D
FALSE	High	GGVTGSPEASISGSK		1	1	1	Q09666	0	1333.66	High	4.02	G
FALSE	High	VGQEIEVRPGIVSK		1	1	1	P41091	0	1510.86	High	4.02	V
FALSE	High	RPISADSAIMNPASK		1	1	3	Q00610	0	1557.81	High	4.02	R
FALSE	High	DIDIEDLEELDPDFIMAK		1	1	3	Q14152	0	2120.99	High	4.02	D
FALSE	High	QVLVAPGNAGTACSEK	1xCarbamidomethyl [C13]	1	1	2	P22102	0	1601.8	High	4.02	Q
FALSE	High	TLLEGSGLESIISIIHSSLAEPR		1	1	2	P49327	0	2422.32	High	4.02	T
FALSE	High	APNTPDILEIEFK		1	1	4	P00966	0	1486.78	High	4.02	A
FALSE	High	ITPSYVAFTPEGER		1	1	5	P11021	0	1566.78	High	4.02	I
FALSE	High	TLWTVLDAIDQMWLPVVR		1	2	1	P18669	0	2156.16	High	4.02	T
FALSE	High	AVFQANQENLPILK		1	1	2	P05023	0	1584.87	High	4.02	A
FALSE	High	VPASQPRPESKPESQIPPQRPQR		1	1	3	Q13283	0	2609.39	High	4.02	V
FALSE	High	VMTIAPGLFGTPLLTSLPEK		1	1	9	Q99714	0	2085.17	High	4.02	V
FALSE	High	SGLGELILPENEPGSSIMPGK		1	1	3	P07954	0	2125.08	High	4.02	S
FALSE	High	GILFVGSGVSGGEEGAR		1	1	2	P52209	0	1591.81	High	4.02	G
FALSE	High	GTDIMYTGTLDCWR	1xCarbamidomethyl [C12]	1	1	3	P05141	0	1688.74	High	4.02	G
FALSE	High	DVSELTGFPEMLGGR		1	1	2	P31939	0	1607.77	High	4.01	D
FALSE	High	KEEELQAALAR		1	3	2	P35579	1	1257.68	High	4.01	K
FALSE	High	TPELNLDQFHDK		1	1	4	P27824	0	1456.71	High	4.01	T
FALSE	High	LAPEEVPLSAEAQAQQLAQELAWCVEQLELGLK	1xCarbamidomethyl [C24]	1	1	1	Q9H7E9	0	3661.88	High	4.01	L
FALSE	High	MITSAAGIISLLDEDEPQLK	1xAcetyl [N-Term]	1	1	4	Q99460	0	2186.13	High	4.01	M
FALSE	High	GFVEPDHYVVVGAQR		1	1	3	P02786	0	1672.84	High	4.01	G
FALSE	High	NAGNCLSPAVIVGLLK	1xCarbamidomethyl [C5]	1	1	10	O43175	0	1625.9	High	4.01	N
FALSE	High	YNVYPTYDFACPIVDSIEGVTHALR	1xCarbamidomethyl [C11]	1	1	5	P07814	0	2900.39	High	4.01	Y
FALSE	High	CPNLTYLNLSGNK	1xCarbamidomethyl [C1]	1	1	2	Q9BTT0	0	1493.74	High	4.01	C
FALSE	High	QGQGQLVTCSGAFK	1xCarbamidomethyl [C9]	1	1	1	Q16531	0	1480.72	High	4.01	Q
FALSE	High	SSGSPYGGGYGSGGGSGGYGSR		1	1	1	P51991	0	1910.79	High	4.01	S
FALSE	High	EIFLSQPILLELEAPLK		2	3	8	P62136; P62140	0	1953.13	High	4.01	E
FALSE	High	TYDATTHFETTCDDIK	1xCarbamidomethyl [C12]	1	1	2	P50395	0	1917.82	High	4.01	T
FALSE	High	GSTAPVGGGAFPTIVER		1	1	2	Q15084	0	1615.84	High	4.01	G
FALSE	High	ETVVEVPQVTWEDIGGLEDVK		1	1	1	P55072	0	2342.18	High	4.01	E
FALSE	High	HRPELIEYDK		1	1	3	O43707	0	1299.67	High	4.01	H
FALSE	High	MEPSSLELPADTVQR	1xAcetyl [N-Term]	1	1	2	Q16719	0	1714.83	High	4.01	M
FALSE	High	DVLGMAQDEMAQAFEDWNK		1	1	9	P52209	0	2197.95	High	4.01	D
FALSE	High	DVWGIEGPIDAAFTR		1	1	3	P04004	0	1646.82	High	4	D
FALSE	High	DNPGVVTCLDEAR	1xCarbamidomethyl [C8]	1	1	2	P22314	0	1445.67	High	4	D
FALSE	High	AEAGAGSATEFQFR		1	2	3	P46783	0	1441.67	High	4	A
FALSE	High	EANFTVSSMHGDMPQK		1	1	1	P38919	0	1778.78	High	4	E
FALSE	High	LDTHPAMVTVLEMGAAR		1	1	1	Q12931	0	1811.91	High	4	L
FALSE	High	VLGTSVESIMATEDR		1	1	5	P31327	0	1607.79	High	4	V
FALSE	High	WNSPAEEGSSDCEVFSK	1xCarbamidomethyl [C12]	1	1	1	P34932	0	1928.8	High	4	W
FALSE	High	TRLEQEIATYR		1	6	5	Q04695	1	1379.73	High	4	T
FALSE	High	SDSFENPVLQQHFR		1	1	4	P12956	0	1703.81	High	4	S
FALSE	High	NGSEADIDEGLYSR		1	1	1	P22314	0	1525.68	High	4	N
FALSE	High	DDPVTNLNNAFEVAEK		1	1	3	O43707	0	1775.84	High	4	D
FALSE	High	LVTSPCCIVTSTYGWTANMER	2xCarbamidomethyl [C6; C7]	1	1	1	P07900	0	2446.12	High	4	L
FALSE	High	ELDPTNMTYITNQAAVYFEK		1	1	3	P31948	0	2348.11	High	4	E
FALSE	High	TAFQEALDAAGDK		1	1	4	P10599	0	1336.64	High	4	T
FALSE	High	GEVITTYCPANNEPIAR	1xCarbamidomethyl [C8]	1	1	1	P49419	0	1904.92	High	4	G
FALSE	High	NILDNMANVTYSTTWSEAQQYLMDNPTFAEDEELQNMDK		1	1	1	O75400	0	4570	High	4	N
FALSE	High	TPCNAGTFSQPEK	1xCarbamidomethyl [C3]	1	1	1	O43684	0	1436.65	High	4	T
FALSE	High	ISGGSVVEMQGDEMTR		1	1	1	O75874	0	1695.77	High	4	I
FALSE	High	LEQPDPGAVAAAAILR		1	1	1	Q3LXA3	0	1591.88	High	4	L
FALSE	High	QGIETPEDQNDLRK		1	1	2	Q15637	1	1642.8	High	4	Q
FALSE	High	VQIAVANAQELLQR		1	1	1	Q9Y5L4	0	1552.88	High	4	V
FALSE	High	FASDDEHDEHDENGATGPVK		1	1	1	P05455	0	2169.9	High	3.99	F
FALSE	High	LLMMAGIDDCYTSAR	1xCarbamidomethyl [C10]	1	1	2	P15880	0	1716.78	High	3.99	L
FALSE	High	VFEMIESQDPTMIGVAVDTVGILGSNVEGK		1	1	2	Q16401	0	3135.56	High	3.99	V
FALSE	High	VDQEIINIMQDR		1	1	1	O96000	0	1473.74	High	3.99	V
FALSE	High	TVIGCSGFHGDCLTLTK	2xCarbamidomethyl [C5; C12]	1	1	2	P20618	0	1865.89	High	3.99	T
FALSE	High	QPAIMPGQSYGLEDGSCSYK	1xCarbamidomethyl [C17]	1	1	1	P14866	0	2187.97	High	3.99	Q
FALSE	High	HFVALSTNTTK		1	1	3	P06744	0	1218.65	High	3.99	H
FALSE	High	EQLGPVTQEFWDNLEK		1	1	3	P02647	0	1932.93	High	3.99	E
FALSE	High	RGDACEGDSGGPFVMK	1xCarbamidomethyl [C5]	1	1	2	P00734	1	1682.73	High	3.99	R
FALSE	High	HRPELIDYGK		1	1	1	P12814	0	1227.65	High	3.99	H
FALSE	High	YAPTEVGLHEMHIK		1	1	3	O75369	0	1624.82	High	3.99	Y
FALSE	High	NFQNIFPPSATLHLSNIPPSVSEEDLK		1	1	3	P26599	0	2994.52	High	3.99	N
FALSE	High	YVVVTGITPTPLGEGK		1	1	2	P11586	0	1630.91	High	3.99	Y
FALSE	High	ELAAEMAAAFLNENLPESIFGAPK		1	1	2	Q15393	0	2533.26	High	3.99	E
FALSE	High	VWDAVSGDELMTLAHK		1	1	1	Q9Y3F4	0	1771.87	High	3.98	V
FALSE	High	NFILDQTNVSAAAQR		1	1	3	Q00839	0	1647.84	High	3.98	N
FALSE	High	GFSEGLWEIENNPTVK		1	1	4	P51858	0	1819.89	High	3.98	G
FALSE	High	GISEFIVMAADAEPLEIILHLPLLCEDK	1xCarbamidomethyl [C25]	1	1	1	P55769	0	3136.63	High	3.98	G
FALSE	High	DDANNDPQWSEEQLIAAK		1	1	3	P22234	0	2043.93	High	3.98	D
FALSE	High	TAVVVGTITDDVR		1	1	3	Q07020	0	1345.73	High	3.98	T
FALSE	High	AGVVGPELHEQLLSAEK		1	1	1	Q15149	0	1776.95	High	3.98	A
FALSE	High	FADDTYTESYISTIGVDFK		2	2	1	P62820; Q9H0U4	0	2172	High	3.98	F
FALSE	High	TTTLSGTAPAAGVVPSR		1	1	1	P27816	0	1585.85	High	3.98	T
FALSE	High	YYGGAEVVDEIELLCQR	1xCarbamidomethyl [C15]	1	1	1	P34897	0	2013.96	High	3.98	Y
FALSE	High	DGHFTLFAPTNEAFEK		1	1	1	Q15063	0	1823.86	High	3.98	D
FALSE	High	LAALPENPPAIDWAYYK		1	1	2	O75947	0	1931.99	High	3.98	L
FALSE	High	SPAGLQVLNDYLADK		1	1	1	P24534	0	1603.83	High	3.98	S
FALSE	High	IIDLEEAEDEIEDIQQEITVLSQCDSPYVTK	1xCarbamidomethyl [C24]	1	1	3	Q9Y6E0	0	3622.72	High	3.98	I
FALSE	High	DSYLILETLPTEYDSR		1	1	1	P17980	0	1914.93	High	3.98	D
FALSE	High	MALELLTQEFGIPIER		1	1	9	P49588	0	1859.99	High	3.97	M
FALSE	High	LEVEANNAFDQYR		1	1	2	P47756	0	1568.73	High	3.97	L
FALSE	High	MEYLIGIQGPDYVLVASDR	1xAcetyl [N-Term]	1	1	4	P49721	0	2181.09	High	3.97	M
FALSE	High	LQDVFNTVGADIIQLPQIVVVGTQSSGK		1	1	2	O00429	0	2926.59	High	3.97	L
FALSE	High	GFNEGLWEIDNNPK		1	1	1	O75475	0	1632.77	High	3.97	G
FALSE	High	ASLYNAVTIEDVQK		1	1	2	Q9Y617	0	1550.81	High	3.97	A
FALSE	High	ENAPAIIFIDEIDAIATK		1	1	6	P43686	0	1944.03	High	3.97	E
FALSE	High	LNEGVVEFASYGDLK		1	1	1	Q13243	0	1640.82	High	3.97	L
FALSE	High	DDLIASILSEVAPTPLDELR		1	1	4	Q01970	0	2167.15	High	3.97	D
FALSE	High	VVPLADIITPNQFEAELLSGR		1	1	4	O00764	0	2282.24	High	3.97	V
FALSE	High	QSSATSSFGGLGGGSVR		1	1	1	P08727	0	1554.75	High	3.97	Q
FALSE	High	AINQGGLTSVAVR		1	1	2	P60900	0	1285.72	High	3.97	A
FALSE	High	MMLGTEGGEGFVVK	1xAcetyl [N-Term]	1	1	3	P31943	0	1496.71	High	3.97	M
FALSE	High	VGTDLLEEEITK		1	1	3	P29692	0	1346.7	High	3.97	V
FALSE	High	EASDIILTDDNFTSIVK		1	3	1	P23634	0	1880.95	High	3.96	E
FALSE	High	ARFEELNADLFR		1	2	2	P11142	1	1480.75	High	3.96	A
FALSE	High	LVPLLLEDGGEAPAALEAALEEK		1	1	3	Q14204	0	2348.26	High	3.96	L
FALSE	High	YELPLVIQALTNIEDK		1	1	3	Q96QD8	0	1859.02	High	3.96	Y
FALSE	High	NGTIELMEPLDEEISGIVEVVGR		1	1	1	P35244	0	2499.26	High	3.96	N
FALSE	High	GNINICLMGDPGVAK	1xCarbamidomethyl [C6]	1	1	1	P33993	0	1558.77	High	3.96	G
FALSE	High	SNMDNMFESYINNLR		1	1	25	P05787	0	1847.81	High	3.96	S
FALSE	High	ALYDTFSAFGNILSCK	1xCarbamidomethyl [C15]	2	2	1	Q13310; P11940	0	1806.87	High	3.96	A
FALSE	High	FLGVAEQLHNEGFK		1	1	3	P31327	0	1588.81	High	3.96	F
FALSE	High	MVGDVTGAQAYASTAK		1	3	2	Q01629	0	1569.76	High	3.96	M
FALSE	High	NINDAWVCTNDMFR	1xCarbamidomethyl [C8]	1	1	2	P61970	0	1755.76	High	3.96	N
FALSE	High	LASEILMQNWDAAMEDLTR		1	1	3	P60228	0	2207.05	High	3.96	L
FALSE	High	KQELLEALTK		1	1	2	P12956	1	1172.69	High	3.96	K
FALSE	High	TPFGAYGGLLK		1	1	2	P42765	0	1123.61	High	3.95	T
FALSE	High	EESGVSVSNSQPTNESHSIK		1	1	1	Q99808	0	2115.98	High	3.95	E
FALSE	High	EPALNEANLSNLK		1	1	2	Q06323	0	1412.74	High	3.95	E
FALSE	High	LRPESALAQAQK		1	1	2	O94826	0	1311.74	High	3.95	L
FALSE	High	GTGVVTSVPSDSPDDIAALR		1	1	1	Q9P2J5	0	1956.99	High	3.95	G
FALSE	High	LLAVAATAPPDAPNREEVFDER		1	1	2	P18206	1	2381.21	High	3.95	L
FALSE	High	LYTLVTYVPVTTFK		1	1	3	P62899	0	1644.92	High	3.95	L
FALSE	High	LTHYHEGLPTTR		1	1	1	Q02809	0	1424.73	High	3.95	L
FALSE	High	EIADLGEALATAVIPQWQK		1	1	8	P49588	0	2053.1	High	3.95	E
FALSE	High	LLTECPPMMDTEYTK	1xCarbamidomethyl [C5]	1	1	2	P55060	0	1828.82	High	3.95	L
FALSE	High	DYGVLLEGSGLALR		1	1	3	P30048	0	1462.79	High	3.94	D
FALSE	High	VSGGLEVLAEK		1	2	3	P39687	0	1101.62	High	3.94	V
FALSE	High	GVLFGVPGAFTPGCSK	1xCarbamidomethyl [C14]	1	1	3	P30044	0	1593.81	High	3.94	G
FALSE	High	AEQINQAAGEASAVLAK		1	1	1	Q9UJZ1	0	1670.87	High	3.94	A
FALSE	High	EELDSLMTDETIANVPILILGNK		1	1	1	Q9Y6B6	0	2528.32	High	3.94	E
FALSE	High	GVTIASGGVLPNIHPELLAK		1	1	2	O75367	0	1986.14	High	3.94	G
FALSE	High	QALETVNDYNPLMK		1	1	1	Q14204	0	1635.8	High	3.94	Q
FALSE	High	SEEWADNHLPLTDAELAR		1	1	1	O60664	0	2066.98	High	3.94	S
FALSE	High	CLMDQATDPNILGR	1xCarbamidomethyl [C1]	1	1	2	P78527	0	1603.76	High	3.94	C
FALSE	High	VSVGAPDLSLEASEGSIK		1	1	2	Q09666	0	1758.91	High	3.94	V
FALSE	High	ISAPNVDFNLEGPK		1	1	1	Q09666	0	1500.77	High	3.94	I
FALSE	High	DVDIIDHHDNTYTVK		1	1	1	P21333	0	1784.84	High	3.94	D
FALSE	High	EGEEAGPGDPLLEAVPK		1	1	2	Q16543	0	1707.84	High	3.94	E
FALSE	High	VQSDGQIVLVDDWIK		1	1	2	Q08211	0	1714.9	High	3.94	V
FALSE	High	NEEEVFAWNNEVK		1	1	1	P49419	0	1607.73	High	3.94	N
FALSE	High	IPYLPITNFNQNWQDGK		1	1	2	O75369	0	2048.02	High	3.94	I
FALSE	High	GINTLVTYDMVPEPK		1	1	3	P20674	0	1676.86	High	3.94	G
FALSE	High	FAAYFQQGDMESNGK		1	1	2	P06744	0	1692.73	High	3.94	F
FALSE	High	VNQAIWLLCTGAR	1xCarbamidomethyl [C9]	1	1	1	P46782	0	1501.79	High	3.93	V
FALSE	High	DLGADIILDMATLTGAQGIATGK		1	1	1	Q8NDH3	0	2245.17	High	3.93	D
FALSE	High	VLEQLTGQTPVFSK		1	1	5	P62913	0	1546.85	High	3.93	V
FALSE	High	IIGVDPEGSILAEPEELNQTEQTTYEVEGIGYDFIPTVLDR		1	1	1	P0DN79	0	4550.23	High	3.93	I
FALSE	High	VDIVAINDPFIDLNYMVYMFQYDSTHGK		1	1	5	P04406	0	3308.56	High	3.93	V
FALSE	High	GLVHAAGPGQDSGSQAGSPPTR		1	1	1	Q96ER9	0	2047	High	3.93	G
FALSE	High	MVVDAVMMLDDLLQLK		1	1	7	Q99832	0	1833.95	High	3.93	M
FALSE	High	AGTGVDNVDLEAATR		1	1	3	O43175	0	1488.73	High	3.93	A
FALSE	High	NTVLCNVVEQFLQADLAR	1xCarbamidomethyl [C5]	1	1	1	Q14258	0	2090.07	High	3.93	N
FALSE	High	SEGALELADVSNELPGLK		1	1	2	Q08J23	0	1841.95	High	3.93	S
FALSE	High	GDPQVYEELFSYSCPK	1xCarbamidomethyl [C14]	1	1	1	Q9Y262	0	1918.85	High	3.93	G
FALSE	High	VDIEAPDVSLEGPEGK		1	1	1	Q09666	0	1654.82	High	3.93	V
FALSE	High	YDLFVGSQATDFGEALVR		1	1	2	O43852	0	1987.98	High	3.93	Y
FALSE	High	IQEGVFDINNEANGIK		1	1	1	P61019	0	1760.88	High	3.93	I
FALSE	High	YEDICPSTHNMDVPNIK	1xCarbamidomethyl [C5]	1	3	3	P63241	0	2032.91	High	3.93	Y
FALSE	High	LYDCQEEEIPELEIDVDELLDMESDDAR	1xCarbamidomethyl [C4]	1	1	2	Q96C90	0	3383.47	High	3.93	L
FALSE	High	MGGGSIEVSVPR		1	1	1	Q96I24	0	1188.6	High	3.93	M
FALSE	High	TTQVPQFILDDFIQNDR		1	1	3	Q08211	0	2050.02	High	3.93	T
FALSE	High	LASALAPSIYEHEDIK		1	1	1	P33991	0	1756.91	High	3.93	L
FALSE	High	LFIGGLNVQTSESGLR		1	1	1	Q13151	0	1690.91	High	3.93	L
FALSE	High	MECDLMETDILESLEDLGYK	1xAcetyl [N-Term]; 1xCarbamidomethyl [C3]	1	1	1	Q8NCA5	0	2446.07	High	3.93	M
FALSE	High	SQLLGSAHEVQR		1	1	1	Q13813	0	1324.7	High	3.93	S
FALSE	High	YNVLGAETVLNQMR		1	1	1	Q1KMD3	0	1607.82	High	3.93	Y
FALSE	High	EFAGEDTSDLFLEER		1	1	1	O14980	0	1757.79	High	3.93	E
FALSE	High	GFGFVTFDDHDPVDK		1	1	4	P22626	0	1695.76	High	3.92	G
FALSE	High	RDIDNLVQR		1	1	1	P49257	1	1128.61	High	3.92	R
FALSE	High	GLGLVYELGNEQDQQELVSTLVETLMTGK		1	1	1	Q5VYK3	0	3164.6	High	3.92	G
FALSE	High	SEDPDQQYLILNTAR		1	1	1	Q96QK1	0	1762.86	High	3.92	S
FALSE	High	VEDPTFLNQLQSGVNR		1	1	1	Q14204	0	1816.92	High	3.92	V
FALSE	High	VAALTGLPFVTAPNK		1	1	2	P07954	0	1498.86	High	3.92	V
FALSE	High	LEAELGNMQGLVEDFK		1	1	23	P05787	0	1792.88	High	3.92	L
FALSE	High	YRVPDVLVADPPIAR		1	1	4	Q14697	1	1680.94	High	3.92	Y
FALSE	High	DDEEMNTWIQAISSAISSDK		1	1	3	Q01082	0	2240	High	3.92	D
FALSE	High	MDDREDLVYQAK	1xAcetyl [N-Term]	1	1	3	P62258	1	1524.7	High	3.92	M
FALSE	High	QQQEELEAEHGTGDKPAAPR		1	1	1	Q13895	0	2191.04	High	3.92	Q
FALSE	High	LGADAVGMSTVPEVIVAR		1	1	2	P00491	0	1784.96	High	3.92	L
FALSE	High	VQQVQPAMQAVIR		1	1	1	Q96TA1	0	1467.81	High	3.92	V
FALSE	High	EEETSIDVAGKPNEVTK		1	1	3	P53985	0	1845.91	High	3.91	E
FALSE	High	IEGEMQVPDVDIR		1	1	1	Q09666	0	1500.74	High	3.91	I
FALSE	High	LFIGGLSFETTDESLR		1	2	11	P09651	0	1784.91	High	3.91	L
FALSE	High	DPELWGSVLLESNPYR		1	1	2	Q00610	0	1874.93	High	3.91	D
FALSE	High	VDEAVAVLQAHQAK		1	2	2	P11940	0	1478.8	High	3.91	V
FALSE	High	LHKPPADSGVDLR		1	1	2	O15427	0	1404.76	High	3.91	L
FALSE	High	YDGQVAVFGSDLQEK		1	1	4	P22314	0	1655.79	High	3.91	Y
FALSE	High	VLLSICSLLCDPNPDDPLVPEIAR	2xCarbamidomethyl [C6; C10]	1	2	2	P61077	0	2706.38	High	3.91	V
FALSE	High	DDQVFEAVGTTDELSSAIGFALELVTEK		1	1	1	Q96EY8	0	2984.46	High	3.91	D
FALSE	High	KHPDASVNFSEFSK		1	1	3	P09429	1	1592.77	High	3.91	K
FALSE	High	LANQAADYFGDAFK		1	1	1	Q8WUM4	0	1530.72	High	3.91	L
FALSE	High	LGTLSALDILIK		1	1	1	Q86VP6	0	1256.78	High	3.91	L
FALSE	High	MDATANDVPSPYEVR		1	1	4	P30101	0	1664.76	High	3.91	M
FALSE	High	HPGSFDVVHVK		1	2	4	P62701	0	1221.64	High	3.91	H
FALSE	High	TELAEPIAIRPTSETVMYPAYAK		1	1	2	P07814	0	2551.31	High	3.91	T
FALSE	High	RKPDTIEVQQMK		3	3	2	P35241; P26038; P15311	1	1472.79	High	3.91	R
FALSE	High	EQGYDVIAYLANIGQK		1	1	3	P00966	0	1781.91	High	3.91	E
FALSE	High	GFCFITYTDEEPVK	1xCarbamidomethyl [C3]	1	1	2	O14979	0	1705.78	High	3.91	G
FALSE	High	GVMLAVDAVIAELK		1	1	9	P10809	0	1428.81	High	3.91	G
FALSE	High	FDQLFDDESDPFEVLK		1	1	9	Q8NC51	0	1943.89	High	3.91	F
FALSE	High	ESQLALIVCPLEQLLQGINPR	1xCarbamidomethyl [C9]	1	1	2	Q92621	0	2391.31	High	3.9	E
FALSE	High	DCEVVMMIGLPGAGK	1xCarbamidomethyl [C2]	1	1	3	Q00839	0	1576.75	High	3.9	D
FALSE	High	FRPDMEEEEAK		1	1	3	Q99436	0	1380.61	High	3.9	F
FALSE	High	TASEMVLADDNFSTIVAAVEEGR		1	2	2	P16615	0	2425.16	High	3.9	T
FALSE	High	GVMGGQSAGPQHTEAETIQK		1	1	1	O60763	0	2025.97	High	3.9	G
FALSE	High	YLDEDTIYHLQPSGR		1	1	3	P31153	0	1806.87	High	3.9	Y
FALSE	High	NLGLEELGIELDPR		1	1	2	P09622	0	1567.83	High	3.9	N
FALSE	High	EFHLNESGDPSSK		1	2	4	Q01105	0	1446.65	High	3.9	E
FALSE	High	DALSDLALHFLNK		1	1	5	P50991	0	1456.78	High	3.9	D
FALSE	High	ATVAAFAASEGHSHPR		1	2	1	O14910	0	1608.79	High	3.9	A
FALSE	High	AMEVDERPTEQYSDIGGLDK		1	1	1	P17980	0	2253.03	High	3.9	A
FALSE	High	QFVTPADVVSGNPK		1	2	2	P13797	0	1458.76	High	3.9	Q
FALSE	High	VVDRDSEEAEIIR		1	1	1	P09874	1	1530.78	High	3.9	V
FALSE	High	GTQGVVTNFEIFR		1	1	1	P55884	0	1467.76	High	3.9	G
FALSE	High	DENLALYVENQFR		1	1	3	P02786	0	1610.78	High	3.9	D
FALSE	High	VDNSSLTGESEPQTR		1	4	2	P05023	0	1619.75	High	3.89	V
FALSE	High	MGPGAASGGERPNLK		1	1	3	Q9H0U4	0	1441.72	High	3.89	M
FALSE	High	CIPALDSLTPANEDQK	1xCarbamidomethyl [C1]	1	1	6	P10809	0	1771.85	High	3.89	C
FALSE	High	VIGIECSSISDYAVK	1xCarbamidomethyl [C6]	1	1	1	Q99873	0	1640.82	High	3.89	V
FALSE	High	FLESVEGNQNYPLLLLTLLEK		1	1	3	P55060	0	2433.33	High	3.89	F
FALSE	High	LEGLIQPDDLINQLTFIMDANQTYLVSER		1	1	2	Q96CS3	0	3349.7	High	3.89	L
FALSE	High	NLGSINTELQDVQR		1	1	2	O75396	0	1586.81	High	3.89	N
FALSE	High	LPDIFEAQIAGLR		1	1	5	P08729	0	1442.8	High	3.89	L
FALSE	High	SSEMNVLIPTEGGDFNEFPVPEQFK		1	1	1	Q01518	0	2811.32	High	3.89	S
FALSE	High	WEAAEGLLQEALDK		1	1	1	O14579	0	1572.79	High	3.89	W
FALSE	High	LALVTGGEIASTFDHPELVK		1	1	2	P78371	0	2097.12	High	3.89	L
FALSE	High	YGGPNHIVGSPFK		1	1	1	O75369	0	1372.7	High	3.89	Y
FALSE	High	LSHANSAVVLSAVK		2	2	1	P63010; Q10567	0	1395.8	High	3.89	L
FALSE	High	LPVDLAEELGHR		1	1	1	P42771	0	1348.72	High	3.89	L
FALSE	High	ELETVCNDVLSLLDK	1xCarbamidomethyl [C6]	1	1	1	Q04917	0	1747.88	High	3.89	E
FALSE	High	GPFTDVVTTNLK		2	2	3	O95292; Q9P0L0	0	1291.69	High	3.88	G
FALSE	High	LLGPDAAINLTDPDGALAK		1	1	1	Q13561	0	1865	High	3.88	L
FALSE	High	YGVNPGPIVGTTR		2	2	2	P42167; P42166	0	1330.71	High	3.88	Y
FALSE	High	LEQGQAIDDLMPAQK		1	1	1	P12277	0	1656.83	High	3.88	L
FALSE	High	FYPEDVAEELIQDITQK		1	1	11	P15311	0	2038	High	3.88	F
FALSE	High	SVGDGETVEFDVVEGEK		2	3	3	P16989; P67809	0	1795.82	High	3.88	S
FALSE	High	QLLAGGIAGAVSR		1	1	1	Q6NUK1	0	1212.71	High	3.88	Q
FALSE	High	VETSDEEIHDLHQR		1	1	2	P07099	0	1707.79	High	3.88	V
FALSE	High	DLLHPSPEEEK		1	1	4	P42677	0	1293.63	High	3.88	D
FALSE	High	FTNLLTSILDSAETK		1	1	3	Q16719	0	1652.87	High	3.88	F
FALSE	High	GAGTDEGCLIEILASR	1xCarbamidomethyl [C8]	1	1	1	P09525	0	1661.82	High	3.88	G
FALSE	High	VPAINVNDSVTK		1	1	3	P23526	0	1256.68	High	3.88	V
FALSE	High	WNTDNTLGTEISWENK		1	1	1	Q9Y277	0	1907.88	High	3.88	W
FALSE	High	HGVDVEVQGPHEAR		1	1	1	Q9HCE1	0	1529.75	High	3.88	H
FALSE	High	VLQLTSWDEDAWASK		1	1	2	P18206	0	1748.85	High	3.88	V
FALSE	High	SVGYKPDFVGFEIPDK		1	1	2	P00492	0	1797.91	High	3.88	S
FALSE	High	LPIGDVATQYFADR		1	1	2	Q99832	0	1565.8	High	3.87	L
FALSE	High	CQLEINFNTLQTK	1xCarbamidomethyl [C1]	2	4	2	P12814; O43707	0	1608.81	High	3.87	C
FALSE	High	GGGGNFGPGPGSNFR		1	1	2	P22626	0	1377.63	High	3.87	G
FALSE	High	SVPTSTVFYPSDGVATEK		1	1	6	P29401	0	1884.92	High	3.87	S
FALSE	High	ALAPTWEQLALGLEHSETVK		1	1	2	Q8NBS9	0	2193.16	High	3.87	A
FALSE	High	DENAIYFLGNSLGLQPK		1	1	4	Q16719	0	1878.96	High	3.87	D
FALSE	High	LGGEVSCLVAGTK	1xCarbamidomethyl [C7]	1	1	1	P13804	0	1290.67	High	3.87	L
FALSE	High	SGDWVCPNPSCGNMNFAR	2xCarbamidomethyl [C6; C11]	1	1	2	Q92804	0	2068.84	High	3.87	S
FALSE	High	IAPSFAVESIEDALK		1	1	5	P31327	0	1589.84	High	3.87	I
FALSE	High	FHQLDIDDLQSIR		1	2	2	P16152	0	1599.81	High	3.87	F
FALSE	High	VADMALHYANK		1	1	2	P50990	0	1232.61	High	3.87	V
FALSE	High	NQDATVYVGGLDEK		1	1	1	Q15427	0	1508.72	High	3.87	N
FALSE	High	MEGPLSVFGDR	1xAcetyl [N-Term]	1	1	3	P17987	0	1249.59	High	3.87	M
FALSE	High	GAVDGGLSIPHSTK		1	1	5	P46777	0	1338.7	High	3.87	G
FALSE	High	ELFVQSEIFPLETPAFAIK		1	1	3	P49915	0	2179.17	High	3.87	E
FALSE	High	GTDVNVFNTILTTR		1	1	6	P04083	0	1550.82	High	3.87	G
FALSE	High	INMNGINNSSGMVDAR		1	1	1	Q15819	0	1692.78	High	3.87	I
FALSE	High	ESADPLGAWLQDAR		1	1	2	Q15149	0	1528.74	High	3.86	E
FALSE	High	TEPATGFIDGDLIESFLDISRPK		1	1	1	Q16531	0	2521.28	High	3.86	T
FALSE	High	DLVSSLTSGLLTIGDR		1	1	4	P53396	0	1646.9	High	3.86	D
FALSE	High	EKPSYDTETDPSEGLMNVLK		1	1	1	Q9HB71	0	2253.06	High	3.86	E
FALSE	High	VGEPVALSEEER		1	1	1	Q13435	0	1314.65	High	3.86	V
FALSE	High	GGVNDNFQGVLQNVR		1	1	1	P07996	0	1616.81	High	3.86	G
FALSE	High	GVVDSEDLPLNISR		3	3	10	P07900; P08238; Q12931	0	1513.79	High	3.86	G
FALSE	High	SILQMSLDHHIVTPLTSLVIENEAGDER	1xOxidation [M5]	1	1	8	P19823	0	3133.58	High	3.86	S
FALSE	High	VLNSYWVGEDSTYK		1	1	3	P61313	0	1660.79	High	3.86	V
FALSE	High	LLVTDMSDAEQYR		1	1	1	O14929	0	1540.73	High	3.86	L
FALSE	High	TTPYQIACGISQGLADNTVIAK	1xCarbamidomethyl [C8]	1	1	5	P26639	0	2321.18	High	3.86	T
FALSE	High	NPPGFAFVEFEDPRDAEDAVR		1	1	2	Q16629	1	2378.1	High	3.86	N
FALSE	High	IDDPTDSKPEDWDKPEHIPDPDAK		1	1	5	P27797	0	2760.26	High	3.86	I
FALSE	High	ACAELHQNVNVK	1xCarbamidomethyl [C2]	1	1	2	Q96QK1	0	1382.68	High	3.86	A
[truncated: 4,542 more rows]

## Sheet: Supp Table S3 - 2PCA A
Checked	Confidence	Sequence	Modifications	# Protein Groups	# Proteins	# PSMs	Master Protein Accessions	# Missed Cleavages	Theo. MH+ [Da]	Confidence (by Search Engine): Sequest HT	XCorr (by Search Engine): Sequest HT	First Amino Acid
FALSE	High	AQAALQAVNSVQSGNLALAASAAAVDAGMAMAGQSPVLR	1x2PCA [N-Term]	1	1	6	P26599	0	3769.91	High	9.47	A
FALSE	High	AASAAGAAGSAGGSSGAAGAAGGGAGAGTRPGDGGTASAGAAGPGAATK	1x2PCA [N-Term]	1	1	1	Q9UKY7	0	3758.75	High	9.28	A
FALSE	High	ILTVEDHYYEGGIGEAVSSAVVGEPGITVTHLAVNR	1x2PCA [N-Term]	1	1	3	P29401	0	3841.94	High	9.15	I
FALSE	High	ALANVNIGSLICNVGAGGPAPAAGAAPAGGPAPSTAAAPAEEK	1xCarbamidomethyl [C12]; 1x2PCA [N-Term]	1	1	8	P05386	0	3897.96	High	8.73	A
FALSE	High	ELEQVCNPIISGLYQGAGGPGPGGFGAQGPK	1xCarbamidomethyl [C6]; 1x2PCA [N-Term]	1	1	2	P0DMV9	0	3144.52	High	8.69	E
FALSE	High	GGLGGGYGGASGMGGITAVTVNQSLLSPLVLEVDPNIQAVR	1x2PCA [N-Term]	1	1	9	P05787	0	4014.08	High	8.45	G
FALSE	High	ADHQPLTEASYVNLPTIALCNTDSPLR	1xCarbamidomethyl [C20]; 1x2PCA [N-Term]	1	1	8	P08865	0	3085.5	High	8.2	A
FALSE	High	VIHDNFGIVEGLMTTVHAITATQK	1x2PCA [N-Term]	1	1	14	P04406	0	2684.39	High	8.2	V
FALSE	High	VGAGAPVYMAAVLEYLTAEILELAGNAAR	1x2PCA [N-Term]	1	2	2	Q16777	0	3022.57	High	8.14	V
FALSE	High	YFAGNLASGGAAGATSLCFVYPLDFAR	1xCarbamidomethyl [C18]; 1x2PCA [N-Term]	1	2	9	P12236	0	2885.37	High	8.12	Y
FALSE	High	VGAGAPVYLAAVLEYLTAEILELAGNAAR	1x2PCA [N-Term]	2	10	1	Q8IUE6; P16104	0	3004.61	High	8	V
FALSE	High	VGATAAVYSAAILEYLTAEVLELAGNASK	1x2PCA [N-Term]	1	2	3	Q71UI9	0	2984.56	High	7.94	V
FALSE	High	SINPDEAVAYGAAVQAAILSGDK	1x2PCA [N-Term]	1	1	18	P11142	0	2349.17	High	7.82	S
FALSE	High	SQDDEIGDGTTGVVVLAGALLEEAEQLLDR	1x2PCA [N-Term]	1	1	1	P48643	0	3202.58	High	7.81	S
FALSE	High	AEGSDVANAVLDGADCIMLSGETAK	1xCarbamidomethyl [C16]; 1x2PCA [N-Term]	1	1	23	P14618	0	2583.17	High	7.76	A
FALSE	High	SLAGSSGPGASSGTSGDHGELVVR	1x2PCA [N-Term]	1	1	5	P29692	0	2274.07	High	7.76	S
FALSE	High	LASVPAGGAVAVSAAPGSAAPAAGSAPAAAEEK	1x2PCA [N-Term]	1	1	11	P05387	0	2863.46	High	7.75	L
FALSE	High	SVVPGGGAVEAALSIYLENYATSMGSR	1x2PCA [N-Term]	1	1	1	P17987	0	2788.36	High	7.74	S
FALSE	High	FQSSAVMALQEACEAYLVGLFEDTNLCAIHAK	2xCarbamidomethyl [C13; C27]; 1xOxidation [M7]; 1x2PCA [N-Term]	1	1	3	P68431	0	3691.72	High	7.72	F
FALSE	High	ASASGSGAQVGGPISSGSSASSVTVTR	1x2PCA [N-Term]	1	1	2	P02545	0	2454.19	High	7.7	A
FALSE	High	TLSSSTQASIEIDSLYEGIDFYTSITR	1x2PCA [N-Term]	1	1	6	P11142	0	3086.48	High	7.7	T
FALSE	High	AFLADPSAFVAAAPVAAATTAAPAAAAAPAK	1x2PCA [N-Term]	1	1	15	P05388	0	2841.49	High	7.7	A
FALSE	High	HIADLAGNSEVILPVPAFNVINGGSHAGNK	1x2PCA [N-Term]	1	1	9	P06733	0	3100.6	High	7.69	H
FALSE	High	LGSAGGLGSTLGGSSYSSCYSFGSGGGYGSSFGGVDGLLAGGEK	1xCarbamidomethyl [C19]; 1x2PCA [N-Term]	1	1	4	Q04695	0	4113.84	High	7.68	L
FALSE	High	VAVSADPNVPNVVVTGLTLVCSSAPGPLELDLTGDLESFK	1xCarbamidomethyl [C21]; 1x2PCA [N-Term]	1	1	1	P52565	0	4170.13	High	7.67	V
FALSE	High	TLNETELTELQSQISDTSVVLSMDNSR	1x2PCA [N-Term]	1	1	9	P08729	0	3099.48	High	7.63	T
FALSE	High	YWSQQIEESTTVVTTQSAEVGAAETTLTELR	1x2PCA [N-Term]	1	1	8	P05783	0	3517.7	High	7.58	Y
FALSE	High	FQSSAVMALQEASEAYLVGLFEDTNLCAIHAK	1xCarbamidomethyl [C27]; 1xOxidation [M7]; 1x2PCA [N-Term]	1	1	2	Q71DI3	0	3618.72	High	7.58	F
FALSE	High	QAFTDVATGSLGQGLGAACGMAYTGK	1xCarbamidomethyl [C19]; 1x2PCA [N-Term]	1	1	5	P29401	0	2621.21	High	7.58	Q
FALSE	High	NMITGTSQADCAVLIVAAGVGEFEAGISK	1xCarbamidomethyl [C11]; 1x2PCA [N-Term]	1	3	6	P68104	0	2998.46	High	7.58	N
FALSE	High	LFQVSTLDAALSGTLSGVEGFTSQEDQEMLSR	1x2PCA [N-Term]	1	1	1	P33992	0	3505.68	High	7.56	L
FALSE	High	TGPAATTLPDGAAAESLVESSEVAVIGFFK	1x2PCA [N-Term]	1	1	2	P07237	0	3024.52	High	7.56	T
FALSE	High	LGLGIDEDEVAAEEPNAAVPDEIPPLEGDEDASR	1x2PCA [N-Term]	1	1	19	P08238	0	3621.67	High	7.54	L
FALSE	High	TDNAGDQHGGGGGGGGGAGAAGGGGGGENYDDPHK	1x2PCA [N-Term]	1	1	2	P14866	0	3070.23	High	7.46	T
FALSE	High	QALVEFEDVLGACNAVNYAADNQIYIAGHPAFVNYSTSQK	1xCarbamidomethyl [C13]; 1x2PCA [N-Term]	1	1	2	P14866	0	4477.12	High	7.44	Q
FALSE	High	CPEALFQPSFLGMESCGIHETTFNSIMK	2xCarbamidomethyl [C1; C16]	1	2	27	P60709	0	3231.46	High	7.44	C
FALSE	High	LEGLTDEFEELEFLSTINVGLTSIANLPK	1x2PCA [N-Term]	1	1	2	P39687	0	3281.68	High	7.43	L
FALSE	High	ERVEAVNMAEGIIHDTETK	1x2PCA [N-Term]	1	1	2	P38646	1	2231.08	High	7.43	E
FALSE	High	VIQGLYSGVTTVELDTLAAETAATLTTK	1x2PCA [N-Term]	1	1	2	P23921	0	2955.56	High	7.42	V
FALSE	High	TALLDAAGVASLLTTAEVVVTEIPK		1	1	2	P10809	0	2482.4	High	7.34	T
FALSE	High	FQSAAIGALQEASEAYLVGLFEDTNLCAIHAK	1xCarbamidomethyl [C27]; 1x2PCA [N-Term]	1	1	2	P84243	0	3526.73	High	7.32	F
FALSE	High	SENVQDLLLLDVAPLSLGLETAGGVMTALIK	1x2PCA [N-Term]	1	1	3	P0DMV9	0	3269.77	High	7.31	S
FALSE	High	IQPGSQQADFLDALIVSMDVIQHETIGK	1x2PCA [N-Term]	1	1	1	P13010	0	3142.59	High	7.28	I
FALSE	High	ALALGASTVMMGSLLAATTEAPGEYFFSDGIR	1x2PCA [N-Term]	1	1	1	P12268	0	3336.63	High	7.27	A
FALSE	High	LGEVSVESENYVQAVEEFQSCLNLQEQYLEAHDR	1xCarbamidomethyl [C21]; 1x2PCA [N-Term]	1	1	3	P49321	0	4101.88	High	7.21	L
FALSE	High	AEGSDVANAVLDGADCIMLSGETAK	1xCarbamidomethyl [C16]; 1xOxidation [M18]; 1x2PCA [N-Term]	1	1	4	P14618	0	2599.17	High	7.21	A
FALSE	High	VFTTQELVQAFTHAPATLEADR	1x2PCA [N-Term]	1	1	5	O95433	0	2534.27	High	7.21	V
FALSE	High	RNDFQLIGIQDGYLSLLQDSGEVR	1x2PCA [N-Term]	1	1	7	P63241	1	2825.42	High	7.2	R
FALSE	High	YCVQLSQIQGLIGSVEEQLAQLR	1xCarbamidomethyl [C2]; 1x2PCA [N-Term]	1	1	1	Q04695	0	2721.4	High	7.18	Y
FALSE	High	ADRDESSPYAAMLAAQDVAQR	1x2PCA [N-Term]	1	1	4	P62263	1	2354.08	High	7.18	A
FALSE	High	LATLGGSQALGLDGEIGNFEVGK	1x2PCA [N-Term]	1	1	2	Q9Y2T3	0	2335.19	High	7.17	L
FALSE	High	TLSTIATSTDAASVVHSTDLVVEAIVENLK	1x2PCA [N-Term]	1	1	1	Q16836	0	3173.66	High	7.14	T
FALSE	High	INALTAASEAACLIVSVDETIK	1xCarbamidomethyl [C12]; 1x2PCA [N-Term]	1	1	3	Q99832	0	2378.23	High	7.12	I
FALSE	High	GGMGSGGLATGIAGGLAGMGGIQNEK	1x2PCA [N-Term]	1	1	4	P05783	0	2350.13	High	7.12	G
FALSE	High	TTGIVMDSGDGVTHTVPIYEGYALPHAILR	1x2PCA [N-Term]	1	2	24	P60709	0	3272.64	High	7.11	T
FALSE	High	SENVQDLLLLDVTPLSLGIETAGGVMTVLIK	1x2PCA [N-Term]	1	1	1	P11142	0	3327.81	High	7.11	S
FALSE	High	TALLDAAGVASLLTTAEVVVTEIPK	1x2PCA [N-Term]	1	1	12	P10809	0	2571.43	High	7.06	T
FALSE	High	FLAAGTHLGGTNLDFQMEQYIYK	1x2PCA [N-Term]	1	1	4	P08865	0	2706.3	High	7.06	F
FALSE	High	SGETEDTFIADLVVGLCTGQIK	1xCarbamidomethyl [C17]; 1x2PCA [N-Term]	1	3	23	P06733	0	2442.19	High	7.03	S
FALSE	High	SINPDEAVAYGAAVQAAILMGDK	1x2PCA [N-Term]	1	2	11	P0DMV9	0	2393.18	High	7.02	S
FALSE	High	LTTPTYGDLNHLVSATMSGVTTCLR	1xCarbamidomethyl [C23]; 1x2PCA [N-Term]	2	5	20	P07437; P68371	0	2797.36	High	7.01	L
FALSE	High	LQVEPAVDTSGVQCYGPGIEGQGVFR	1xCarbamidomethyl [C14]; 1x2PCA [N-Term]	1	1	4	P21333	0	2852.37	High	7.01	L
FALSE	High	SGTIFDNFLITNDEAYAEEFGNETWGVTK	1x2PCA [N-Term]	1	1	9	P27797	0	3357.52	High	7	S
FALSE	High	DQEVNFQEYVTFLGALALIYNEALK	1x2PCA [N-Term]	1	1	1	P06703	0	2977.5	High	6.99	D
FALSE	High	TLSSSTQASLEIDSLFEGIDFYTSITR	1x2PCA [N-Term]	1	1	1	P0DMV9	0	3070.49	High	6.97	T
FALSE	High	NMGGPYGGGNYGPGGSGGSGGYGGR	1x2PCA [N-Term]	1	1	6	P22626	0	2278.93	High	6.97	N
FALSE	High	VGTDMLEEQITAFEDYVQSMDVAAFNK	1x2PCA [N-Term]	1	1	2	P24534	0	3140.42	High	6.94	V
FALSE	High	IAAQDLLLAVATDFQNESAAALAAAATR	1x2PCA [N-Term]	1	1	1	Q96P70	0	2875.49	High	6.94	I
FALSE	High	NMITGTSQADCAVLIVAAGVGEFEAGISK	1xCarbamidomethyl [C11]; 1xOxidation [M2]; 1x2PCA [N-Term]	1	3	5	P68104	0	3014.46	High	6.93	N
FALSE	High	LGSAADFLLDISETDLSSLTASIK	1x2PCA [N-Term]	1	1	4	O75369	0	2556.31	High	6.93	L
FALSE	High	LDTNSDGQLDFSEFLNLIGGLAMACHDSFLK	1xCarbamidomethyl [C25]; 1x2PCA [N-Term]	1	1	1	P31949	0	3517.64	High	6.93	L
FALSE	High	EAMQQADDWLGIPQVITPEEIVDPNVDEHSVMTYLSQFPK	1x2PCA [N-Term]	1	1	4	P21333	0	4659.21	High	6.93	E
FALSE	High	FQSSAVMALQEACEAYLVGLFEDTNLCAIHAK	2xCarbamidomethyl [C13; C27]; 1x2PCA [N-Term]	1	1	2	P68431	0	3675.73	High	6.92	F
FALSE	High	VHAELADVLTEAVVDSILAIK	1x2PCA [N-Term]	1	1	2	P40227	0	2295.26	High	6.91	V
FALSE	High	EGILNDDIYCPPETAVLLASYAVQSK	1xCarbamidomethyl [C10]; 1x2PCA [N-Term]	1	1	11	P26038	0	2955.44	High	6.91	E
FALSE	High	TNHIGHTGYLNTVTVSPDGSLCASGGK	1xCarbamidomethyl [C22]; 1x2PCA [N-Term]	1	1	4	P63244	0	2832.34	High	6.9	T
FALSE	High	VSHVSTGGGASLELLEGK	1x2PCA [N-Term]	1	2	9	P00558	0	1829.94	High	6.89	V
FALSE	High	VAVSADPNVPNVVVTGLTLVCSSAPGPLELDLTGDLESFKK	1xCarbamidomethyl [C21]; 1x2PCA [N-Term]	1	1	1	P52565	1	4298.23	High	6.88	V
FALSE	High	NMITGTAPLDGCILVVAANDGPMPQTR	1xCarbamidomethyl [C12]; 1x2PCA [N-Term]	1	1	1	P49411	0	2901.41	High	6.87	N
FALSE	High	VVAQSTNSEEIIEGEYNTVMLAIGR	1x2PCA [N-Term]	1	1	4	Q16881	0	2812.38	High	6.86	V
FALSE	High	DQAVENILVSPVVVASSLGLVSLGGK	1x2PCA [N-Term]	1	1	3	P50454	0	2640.46	High	6.85	D
FALSE	High	YDCGEEILITVLSAMTEEAAVAIK	1xCarbamidomethyl [C3]; 1x2PCA [N-Term]	1	2	3	P63241	0	2715.33	High	6.85	Y
FALSE	High	DLSAAGIGLLAAATQSLSMPASLGR	1x2PCA [N-Term]	1	1	1	P43243	0	2460.29	High	6.84	D
FALSE	High	TDDEVVQREEEAIQLDGLNASQIR	1x2PCA [N-Term]	1	1	2	P14625	1	2817.36	High	6.84	T
FALSE	High	AFADALEVIPMALSENSGMNPIQTMTEVR	1x2PCA [N-Term]	1	1	1	P48643	0	3224.54	High	6.84	A
FALSE	High	ALVDHENVISCPHLGASTK	1xCarbamidomethyl [C11]; 1x2PCA [N-Term]	1	1	6	O43175	0	2137.05	High	6.83	A
FALSE	High	IGYNPDTVAFVPISGWNGDNMLEPSANMPWFK	1x2PCA [N-Term]	1	2	4	P68104	0	3656.7	High	6.81	I
FALSE	High	TAIAMGMAQALGPDTPFTAIAGSEIFSLEMSK	1x2PCA [N-Term]	1	1	1	Q9Y230	0	3345.62	High	6.8	T
FALSE	High	ALDLFSDNAPPPELLEIINEDIAK	1x2PCA [N-Term]	1	1	2	Q15084	0	2726.39	High	6.79	A
FALSE	High	IAIPGLAGAGNSVLLVSNLNPER	1x2PCA [N-Term]	1	1	9	P26599	0	2364.3	High	6.79	I
FALSE	High	LGLGIDEDDPTADDTSAAVTEEMPPLEGDDDTSR	1x2PCA [N-Term]	1	1	5	P07900	0	3636.57	High	6.77	L
FALSE	High	LVQDVANNTNEEAGDGTTTATVLAR	1x2PCA [N-Term]	1	1	8	P10809	0	2649.28	High	6.76	L
FALSE	High	SAAPGSLGYQWLSDGSGVFEIAEASGVR	1x2PCA [N-Term]	1	1	2	Q12931	0	2900.38	High	6.75	S
FALSE	High	IHVSDQELQSANASVDDSRLEELK	1x2PCA [N-Term]	1	1	2	P22314	1	2772.34	High	6.72	I
FALSE	High	FQSSAVMALQEASEAYLVGLFEDTNLCAIHAK	1xCarbamidomethyl [C27]; 1x2PCA [N-Term]	1	1	3	Q71DI3	0	3602.73	High	6.71	F
FALSE	High	MQDLDEDATLTQLATAWVSLATGGEK	1x2PCA [N-Term]	1	1	1	O14579	0	2853.36	High	6.7	M
FALSE	High	AEGSDVANAVLDGADCIMLSGETAK	1xCarbamidomethyl [C16]	1	1	2	P14618	0	2494.14	High	6.69	A
FALSE	High	LTAQVASLTSELTTLNATIQQQDQELAGLK	1x2PCA [N-Term]	1	1	1	Q14980	0	3274.72	High	6.69	L
FALSE	High	AVTNEPEEEELATLSEEEIAMAVTAWEK	1x2PCA [N-Term]	1	1	1	P56192	0	3208.49	High	6.69	A
FALSE	High	ELQSQISDTSVVLSMDNSR	1x2PCA [N-Term]	1	1	8	P05787	0	2198.04	High	6.68	E
FALSE	High	AQDPSEVLTMLTNETGFEISSSDATVK	1x2PCA [N-Term]	1	1	5	Q12905	0	2959.39	High	6.68	A
FALSE	High	AYHEQLSVAEITNACFEPANQMVK	1xCarbamidomethyl [C15]; 1x2PCA [N-Term]	2	5	2	Q71U36; P68366	0	2839.32	High	6.67	A
FALSE	High	IIPTLEEGLQLPSPTATSQLPLESDAVECLNYQHYK	1xCarbamidomethyl [C29]; 1x2PCA [N-Term]	1	1	13	P61978	0	4144.06	High	6.66	I
FALSE	High	IATLDMSSDQIAANLQAVINEVCR	1xCarbamidomethyl [C23]; 1x2PCA [N-Term]	1	1	1	Q9BYD6	0	2721.33	High	6.66	I
FALSE	High	IITITGTQDQIQNAQYLLQNSVK	1x2PCA [N-Term]	1	1	10	P61978	0	2678.41	High	6.65	I
FALSE	High	LGDPAEYAHLVQAIIENPFLNGEVIR	1x2PCA [N-Term]	1	1	1	Q99714	0	2967.54	High	6.65	L
FALSE	High	QGQYSPMAIEEQVAVIYAGVR	1x2PCA [N-Term]	1	1	4	P25705	0	2398.19	High	6.64	Q
FALSE	High	FTASAGIQVVGDDLTVTNPK	1x2PCA [N-Term]	1	1	18	P06733	0	2122.08	High	6.63	F
FALSE	High	LGGGMPGLGQGPPTDAPAVDTAEQVYISSLALLK	1x2PCA [N-Term]	1	1	1	O00487	0	3412.75	High	6.62	L
FALSE	High	FEALAAHDALVELSGAMNTTACSLMK	1xCarbamidomethyl [C22]; 1x2PCA [N-Term]	1	1	2	P07954	0	2840.34	High	6.62	F
FALSE	High	LQSVQALTEIQEFISFISK	1x2PCA [N-Term]	1	1	1	P78527	0	2270.21	High	6.62	L
FALSE	High	HLEGLSEEAIMELNLPTGIPIVYELDK	1x2PCA [N-Term]	1	1	1	P18669	0	3112.59	High	6.61	H
FALSE	High	EVAAFAQFGSDLDAATQQLLSR	1x2PCA [N-Term]	1	1	9	P25705	0	2427.19	High	6.6	E
FALSE	High	AGKPVICATQMLESMIK	1xCarbamidomethyl [C7]; 1x2PCA [N-Term]	1	1	8	P14618	0	1966	High	6.6	A
FALSE	High	LAYVAAGDLAPINAFIGGLAAQEVMK	1x2PCA [N-Term]	1	1	2	P22314	0	2692.42	High	6.59	L
FALSE	High	LQAALDDEEAGGRPAMEPGNGSLDLGGDSAGR	1x2PCA [N-Term]	1	1	3	Q00839	0	3215.47	High	6.59	L
FALSE	High	VTASGPGLSSYGVPASLPVDFAIDAR	1x2PCA [N-Term]	1	1	5	O75369	0	2636.34	High	6.59	V
FALSE	High	QFLQAAEAIDDIPFGITSNSDVFSK	1x2PCA [N-Term]	1	1	10	P07237	0	2802.36	High	6.58	Q
FALSE	High	YAPTEAQLNAVDALIDSMSLAK	1x2PCA [N-Term]	1	1	4	P13010	0	2410.2	High	6.58	Y
FALSE	High	FDVFEDFISPTTAAQTLLFTACSK	1xCarbamidomethyl [C22]; 1x2PCA [N-Term]	1	1	1	O95373	0	2798.34	High	6.58	F
FALSE	High	SNTGGQAFPQCVFDHWQILPGDPFDNSSRPSQVVAETR	1xCarbamidomethyl [C11]; 1x2PCA [N-Term]	1	1	11	P13639	0	4334.01	High	6.58	S
FALSE	High	MDTEGFGELLQQAEQLAAETEGISELPHVER	1xAcetyl [N-Term]	1	1	1	Q8N1F7	0	3469.64	High	6.57	M
FALSE	High	AVSSAIAQLLGEVAQGNENYAGIAAR	1x2PCA [N-Term]	1	1	1	Q9Y490	0	2662.36	High	6.57	A
FALSE	High	VLHEAEGHIVTCETNTGEVYR	1xCarbamidomethyl [C12]; 1x2PCA [N-Term]	1	1	2	P62318	0	2503.17	High	6.55	V
FALSE	High	VAPEEHPVLLTEAPLNPK	1x2PCA [N-Term]	1	2	33	P60709	0	2043.09	High	6.55	V
FALSE	High	ALINADELASDVAGAEALLDR	1x2PCA [N-Term]	1	1	1	Q13813	0	2216.12	High	6.54	A
FALSE	High	IEWLESHQDADIEDFK	1x2PCA [N-Term]	1	1	8	P11021	0	2063.93	High	6.53	I
FALSE	High	SGSAADTQAVADAVTYQLGFHSIELNEPPLVHTAASLFK	1x2PCA [N-Term]	1	1	1	P28072	0	4145.06	High	6.52	S
FALSE	High	GGPGSAVSPYPTFNPSSDVAALHK	1x2PCA [N-Term]	1	1	5	P04083	0	2445.18	High	6.52	G
FALSE	High	HGEVCPAGWKPGSDTIKPDVQK	1xCarbamidomethyl [C5]; 1x2PCA [N-Term]	1	1	10	Q06830	0	2495.21	High	6.5	H
FALSE	High	FDPTQFQDCIIQGLTETGTDLEAVAK	1xCarbamidomethyl [C9]; 1x2PCA [N-Term]	1	1	1	Q7L1Q6	0	2986.41	High	6.49	F
FALSE	High	VGEVCHITCKPEYAYGSAGSPPK	2xCarbamidomethyl [C5; C9]; 1x2PCA [N-Term]	1	1	2	Q02790	0	2596.2	High	6.49	V
FALSE	High	TSIEDQDELSSLLQVPLVAGTVNR	1x2PCA [N-Term]	1	1	3	P56537	0	2673.37	High	6.49	T
FALSE	High	VANAESLNAIGVLIYMDQTK	1x2PCA [N-Term]	1	1	4	P02786	0	2239.14	High	6.48	V
FALSE	High	YMNSGPVVAMVWEGLNVVK	1x2PCA [N-Term]	1	2	4	P22392	0	2182.08	High	6.48	Y
FALSE	High	DLYANTVLSGGTTMYPGIADR	1x2PCA [N-Term]	1	2	20	P60709	0	2304.1	High	6.48	D
FALSE	High	NEEDAAELVALAQAVNAR	1x2PCA [N-Term]	1	1	4	P22314	0	1972.97	High	6.48	N
FALSE	High	KPTDGASSSNCVTDISHLVR	1xCarbamidomethyl [C11]	1	1	1	P49321	0	2144.04	High	6.46	K
FALSE	High	TGPAATTLPDGAAAESLVESSEVAVIGFFK		1	1	1	P07237	0	2935.49	High	6.46	T
FALSE	High	NQAFIEMNTEEAANTMVNYYTSVTPVLR	1x2PCA [N-Term]	1	1	4	P26599	0	3295.54	High	6.45	N
FALSE	High	ECPSDECGAGVFMASHFDR	2xCarbamidomethyl [C2; C7]; 1x2PCA [N-Term]	1	1	4	P62979	0	2260.88	High	6.45	E
FALSE	High	TDVCVFAAQEDLETMQAFAQVFNK	1xCarbamidomethyl [C4]; 1x2PCA [N-Term]	1	1	1	Q7L1Q6	0	2851.31	High	6.45	T
FALSE	High	LCYVALDFEQEMATAASSSSLEK	1xCarbamidomethyl [C2]; 1x2PCA [N-Term]	1	3	24	P60709	0	2639.2	High	6.44	L
FALSE	High	TVASPGVTVEEAVEQIDIGGVTLLR	1x2PCA [N-Term]	1	1	2	P31939	0	2642.4	High	6.43	T
FALSE	High	ESTGAQVQVAGDMLPNSTER	1x2PCA [N-Term]	2	3	6	Q15366; Q15365	0	2179.01	High	6.43	E
FALSE	High	AAEAAAAPAESAAPAAGEEPSKEEGEPK	1x2PCA [N-Term]	1	1	4	P80723	1	2725.26	High	6.43	A
FALSE	High	LEGDSTDLSDQIAELQAQIAELK	1x2PCA [N-Term]	1	1	4	P35579	0	2576.27	High	6.42	L
FALSE	High	LGGTIDDCELVEGLVLTQK	1xCarbamidomethyl [C8]; 1x2PCA [N-Term]	1	1	4	P50991	0	2149.08	High	6.42	L
FALSE	High	ALGLGVEQLPVVFEDVVLHQATILPK	1x2PCA [N-Term]	1	1	2	P49327	0	2874.61	High	6.41	A
FALSE	High	TGQATVASGIPAGWMGLDCGPESSK	1xCarbamidomethyl [C19]; 1x2PCA [N-Term]	1	1	6	P00558	0	2566.17	High	6.41	T
FALSE	High	ESPLSLYNEELVSMNVQGDYEPTDATGFININSLR	1x2PCA [N-Term]	1	1	5	P00966	0	4004.89	High	6.41	E
FALSE	High	FLTALAQDGVINEEALSVTELDR	1x2PCA [N-Term]	1	1	1	Q8WUM4	0	2593.31	High	6.4	F
FALSE	High	TLVLSNLSYSATEETLQEVFEK	1x2PCA [N-Term]	1	1	6	P19338	0	2590.29	High	6.4	T
FALSE	High	IEVQDTSGGTTALRPSASTQALSSSVSSSK	1x2PCA [N-Term]	1	1	1	Q16531	0	3041.5	High	6.4	I
FALSE	High	TSRPENAIIYNNNEDFQVGQAK	1x2PCA [N-Term]	1	1	6	P29401	0	2597.24	High	6.39	T
FALSE	High	LFAQLAGEDAEISAFELQTILR	1x2PCA [N-Term]	1	1	1	P17655	0	2524.31	High	6.38	L
FALSE	High	IYEGQVEVTGDEYNVESIDGQPGAFTCYLDAGLAR	1xCarbamidomethyl [C27]; 1x2PCA [N-Term]	1	1	8	P46777	0	3925.79	High	6.37	I
FALSE	High	QVYEEEYGSSLEDDVVGDTSGYYQR	1x2PCA [N-Term]	1	1	1	P08758	0	2977.26	High	6.37	Q
FALSE	High	EIAEAYLGYPVTNAVITVPAYFNDSQR	1x2PCA [N-Term]	1	1	7	P0DMV9	0	3090.52	High	6.36	E
FALSE	High	TQTSDPAMLPTMIGLLAEAGVR	1x2PCA [N-Term]	1	1	11	O43175	0	2361.19	High	6.36	T
FALSE	High	IIYLNQLLQEDSLNVADLTSLR	1x2PCA [N-Term]	1	1	2	Q9UL46	0	2620.4	High	6.36	I
FALSE	High	YTPSGQAGAAASESLFVSNHAY	1x2PCA [N-Term]	1	1	5	P04075	0	2317.05	High	6.35	Y
FALSE	High	EADIDGDGQVNYEEFVQMMTAK	1x2PCA [N-Term]	1	1	8	P0DP25	0	2579.11	High	6.35	E
FALSE	High	LVGQGASAVLLDLPNSGGEAQAK	1x2PCA [N-Term]	1	1	2	Q99714	0	2284.19	High	6.32	L
FALSE	High	SVVLMSHLGRPDGVPMPDK	1x2PCA [N-Term]	1	1	3	P00558	0	2124.07	High	6.32	S
FALSE	High	TNVNGGAIALGHPLGGSGSR	1x2PCA [N-Term]	1	1	2	P42765	0	1923.98	High	6.32	T
FALSE	High	INQVFHGSCITEGNELTK	1xCarbamidomethyl [C9]; 1x2PCA [N-Term]	1	1	2	P78527	0	2136.02	High	6.3	I
FALSE	High	EGICALGGTSELSSEGTQHSYSEEEK	1xCarbamidomethyl [C4]; 1x2PCA [N-Term]	1	1	1	P13797	0	2874.24	High	6.29	E
FALSE	High	LVPLLLEDGGEAPAALEAALEEK	1x2PCA [N-Term]	1	1	2	Q14204	0	2437.29	High	6.29	L
FALSE	High	LMEPIYLVEIQCPEQVVGGIYGVLNR	1xCarbamidomethyl [C12]; 1x2PCA [N-Term]	1	1	2	P13639	0	3078.58	High	6.29	L
FALSE	High	SINPDEAVAYGAAVQAAILMGDK	1xOxidation [M20]; 1x2PCA [N-Term]	1	2	2	P0DMV9	0	2409.18	High	6.29	S
FALSE	High	LSLEGDHSTPPSAYGSVK	1x2PCA [N-Term]	1	2	17	P07355	0	1933.93	High	6.28	L
FALSE	High	YGGPPPDSVYSGQQPSVGTEIFVGK	1x2PCA [N-Term]	1	1	3	O60506	0	2655.27	High	6.28	Y
FALSE	High	AEQPDGLILGMGGQTALNCGVELFK	1xCarbamidomethyl [C19]; 1x2PCA [N-Term]	1	1	5	P31327	0	2707.32	High	6.27	A
FALSE	High	VTGEADVEFATHEDAVAAMSK	1x2PCA [N-Term]	1	1	1	P31943	0	2267.03	High	6.26	V
FALSE	High	NVGCLQEALQLATSFAQLR	1xCarbamidomethyl [C4]; 1x2PCA [N-Term]	1	1	1	P49588	0	2208.12	High	6.25	N
FALSE	High	INNVIDNLIVAPGTFEVQIEEVR	1x2PCA [N-Term]	1	1	5	Q12905	0	2671.41	High	6.25	I
FALSE	High	ILGGVISAISEAAAQYNPEPPPPR	1x2PCA [N-Term]	1	1	1	P04632	0	2536.32	High	6.25	I
FALSE	High	TATALLESPLSATVEDALQSFLK	1x2PCA [N-Term]	1	1	1	Q96TC7	0	2494.31	High	6.24	T
FALSE	High	FGGQLLSFDIGDQPVFEIPLSNVSQCTTGK	1xCarbamidomethyl [C26]; 1x2PCA [N-Term]	1	1	1	Q08945	0	3343.63	High	6.23	F
FALSE	High	FSGWYDADLSPAGHEEAK	1x2PCA [N-Term]	1	1	4	P18669	0	2068.9	High	6.23	F
FALSE	High	RPQYSNPPVQGEVMEGADNQGAGEQGRPVR		1	1	3	P67809	0	3223.53	High	6.22	R
FALSE	High	SCVLFNCAALASQIAAEQNLDNDEGLK	2xCarbamidomethyl [C2; C7]; 1x2PCA [N-Term]	1	1	1	Q8WUM4	0	3040.41	High	6.22	S
FALSE	High	LAPITSDPTEATAVGAVEASFK	1x2PCA [N-Term]	1	1	32	P14618	0	2264.14	High	6.22	L
FALSE	High	LVDISYGGENGFNQAIELSTEVLSNVK	1x2PCA [N-Term]	1	1	1	P62495	0	2985.48	High	6.21	L
FALSE	High	YALQMEQLNGILLHLESELAQTR	1x2PCA [N-Term]	1	1	1	P05783	0	2759.42	High	6.21	Y
FALSE	High	TLTAVHDAILEDLVFPSEIVGK	1x2PCA [N-Term]	1	1	9	P62081	0	2456.31	High	6.21	T
FALSE	High	EIVHIQAGQCGNQIGAK	1xCarbamidomethyl [C10]; 1x2PCA [N-Term]	3	6	28	Q13509; P07437; P68371	0	1911.95	High	6.2	E
FALSE	High	EKPYFPIPEEYTFIQNVPLEDR	1x2PCA [N-Term]	1	1	1	Q00839	0	2813.38	High	6.2	E
FALSE	High	LGDAVEQGVINNTVLGYFIGR	1x2PCA [N-Term]	1	1	1	P41250	0	2324.2	High	6.19	L
FALSE	High	VQDDEVGDGTTSVTVLAAELLR	1x2PCA [N-Term]	1	1	3	P78371	0	2377.19	High	6.19	V
FALSE	High	VELSDVQNPAISITENVLHFK	1x2PCA [N-Term]	1	1	4	Q9P035	0	2442.27	High	6.19	V
FALSE	High	EQQEAIEHIDEVQNEIDR	1x2PCA [N-Term]	1	2	3	Q01105	0	2284.05	High	6.17	E
FALSE	High	YTLPPGVDPTQVSSSLSPEGTLTVEAPMPK	1x2PCA [N-Term]	1	1	4	P04792	0	3187.59	High	6.16	Y
FALSE	High	ADDPSSYMEVVQAANTSGNWEELVK	1x2PCA [N-Term]	1	1	2	Q00610	0	2829.27	High	6.16	A
FALSE	High	YGDGGSTFQSTTGHCVHMR	1xCarbamidomethyl [C15]; 1x2PCA [N-Term]	1	1	3	P31943	0	2186.91	High	6.16	Y
FALSE	High	VDEFPLCGHMVSDEYEQLSSEALEAAR	1xCarbamidomethyl [C7]; 1x2PCA [N-Term]	1	1	6	P27635	0	3171.4	High	6.16	V
FALSE	High	GQILTMANPIIGNGGAPDTTALDELGLSK	1x2PCA [N-Term]	1	1	1	P31327	0	2956.51	High	6.15	G
FALSE	High	DGAGFLINLIDSPGHVDFSSEVTAALR	1x2PCA [N-Term]	1	1	3	P13639	0	2890.44	High	6.15	D
FALSE	High	AFADAMEVIPSTLAENAGLNPISTVTELR	1x2PCA [N-Term]	1	1	2	P50991	0	3119.57	High	6.14	A
FALSE	High	ACANPAAGSVILLENLR	1xCarbamidomethyl [C2]; 1x2PCA [N-Term]	1	1	22	P00558	0	1857.96	High	6.14	A
FALSE	High	NLSPYVSNELLEEAFSQFGPIER	1x2PCA [N-Term]	1	1	1	P23246	0	2728.33	High	6.14	N
FALSE	High	DVQIGDIVTVGECRPLSK	1xCarbamidomethyl [C13]; 1x2PCA [N-Term]	1	1	3	P62280	0	2075.06	High	6.14	D
FALSE	High	MLPTIIADNAGYDSADLVAQLR	1x2PCA [N-Term]	1	1	6	P78371	0	2436.22	High	6.14	M
FALSE	High	ISSIQSIVPALEIANAHR	1x2PCA [N-Term]	1	1	14	P10809	0	2008.1	High	6.13	I
FALSE	High	QVVIDGETCLLDILDTAGQEEYSAMR	1xCarbamidomethyl [C9]; 1x2PCA [N-Term]	1	3	1	P01116	0	3015.41	High	6.13	Q
FALSE	High	ALMLQGVDLLADAVAVTMGPK	1x2PCA [N-Term]	1	1	6	P10809	0	2202.17	High	6.12	A
FALSE	High	IGEHTPSALAIMENANVLAR	1x2PCA [N-Term]	1	1	14	P04075	0	2196.12	High	6.12	I
FALSE	High	DELILEGNDIELVSNSAALIQQATTVK	1x2PCA [N-Term]	1	1	6	P32969	0	2973.54	High	6.12	D
FALSE	High	MEYDGILIAGGPGNPALAEPLIQNVR	1x2PCA [N-Term]	1	1	5	P31327	0	2797.43	High	6.11	M
FALSE	High	DELHIVEAEAMNYEGSPIK	1x2PCA [N-Term]	1	1	2	P06748	0	2234.04	High	6.11	D
FALSE	High	SADFVVESIGSEVGSLGFAIEGPSQAK	1x2PCA [N-Term]	1	1	4	O75369	0	2770.36	High	6.1	S
FALSE	High	VAHALAEGLGVIACIGEK	1xCarbamidomethyl [C14]; 1x2PCA [N-Term]	1	1	7	P60174	0	1897	High	6.09	V
FALSE	High	DGVADVSIEDSVISLSGDHCIIGR	1xCarbamidomethyl [C20]; 1x2PCA [N-Term]	1	1	2	P00441	0	2603.24	High	6.09	D
FALSE	High	ATCAPQHGAPGPGPADASK	1xCarbamidomethyl [C3]; 1x2PCA [N-Term]	1	1	4	P21333	0	1878.86	High	6.09	A
FALSE	High	LNSNTQVVLLSATMPSDVLEVTK	1x2PCA [N-Term]	1	1	6	P60842	0	2548.33	High	6.09	L
FALSE	High	EMEENFAVEAANYQDTIGR	1x2PCA [N-Term]	1	1	6	P08670	0	2275.99	High	6.09	E
FALSE	High	VSDTVVEPYNATLSVHQLVENTDETYCIDNEALYDICFR	2xCarbamidomethyl [C27; C37]; 1x2PCA [N-Term]	2	5	5	P07437; P68371	0	4682.13	High	6.08	V
FALSE	High	ASGPGLNTTGVPASLPVEFTIDAK	1x2PCA [N-Term]	1	1	2	P21333	0	2431.25	High	6.08	A
FALSE	High	HTGPGILSMANAGPNTNGSQFFICTAK	1xCarbamidomethyl [C24]; 1xOxidation [M9]; 1x2PCA [N-Term]	1	1	1	P62937	0	2896.35	High	6.08	H
FALSE	High	VSCLGVTDDGMAVATGSWDSFLK	1xCarbamidomethyl [C3]; 1x2PCA [N-Term]	1	2	4	P62879	0	2505.14	High	6.08	V
FALSE	High	LVARPEPATGYTLEFR	1x2PCA [N-Term]	1	1	1	Q16658	0	1909	High	6.08	L
FALSE	High	ELASQPDVDGFLVGGASLKPEFVDIINAK	1x2PCA [N-Term]	1	1	15	P60174	0	3118.61	High	6.07	E
FALSE	High	VMTIPYQPMPASSPVICAGGQDR	1xCarbamidomethyl [C17]; 1x2PCA [N-Term]	1	1	2	Q15365	0	2564.21	High	6.07	V
FALSE	High	VLDNYLTSPLPEEVDETSAEDEGVSQR	1x2PCA [N-Term]	1	1	3	O00299	0	3081.42	High	6.07	V
FALSE	High	DFSALESQLQDTQELLQEENR	1x2PCA [N-Term]	1	1	2	P35579	0	2582.2	High	6.07	D
FALSE	High	YHTSQSGDEMTSLSEYVSR	1x2PCA [N-Term]	1	1	5	P08238	0	2265.97	High	6.06	Y
FALSE	High	VTGEADVEFATHEDAVAAMAK	1xOxidation [M19]; 1x2PCA [N-Term]	1	1	1	P55795	0	2267.03	High	6.06	V
FALSE	High	DGTVLCELINALYPEGQAPVK	1xCarbamidomethyl [C6]; 1x2PCA [N-Term]	1	1	8	P37802	0	2376.19	High	6.06	D
FALSE	High	LVSPGSANETSSILVESVTR	1x2PCA [N-Term]	1	1	3	O75369	0	2135.1	High	6.05	L
FALSE	High	LFAQLAGDDMEVSATELMNILNK	1x2PCA [N-Term]	1	1	2	P04632	0	2612.27	High	6.05	L
FALSE	High	TASEMVLADDNFSTIVAAVEEGR	1x2PCA [N-Term]	1	2	2	P16615	0	2514.18	High	6.05	T
FALSE	High	EPLGNVLFSPICLSTSLSLAQVGAK	1xCarbamidomethyl [C12]	1	1	3	P36952	0	2601.4	High	6.04	E
FALSE	High	VADEDDVDNEEAALLHEEATMTIEELLTR	1x2PCA [N-Term]	1	1	1	O15355	0	3360.54	High	6.03	V
FALSE	High	TAFDEAIAELDTLNEDSYK	1x2PCA [N-Term]	1	1	9	P27348	0	2234.01	High	6.03	T
FALSE	High	VSPETVDSVIMGNVLQSSSDAIYLAR	1x2PCA [N-Term]	1	1	1	P42765	0	2840.41	High	6.02	V
FALSE	High	IFTDLQSEGFPVIETSTLTEEGVIK	1x2PCA [N-Term]	1	1	1	Q9BZE4	0	2842.44	High	6.02	I
FALSE	High	LVSSPCCIVTSTYGWTANMER	2xCarbamidomethyl [C6; C7]; 1x2PCA [N-Term]	1	1	9	P08238	0	2521.13	High	6.02	L
FALSE	High	STVLTPMFVETQASQGTLQTR	1x2PCA [N-Term]	1	1	1	P78527	0	2384.19	High	6.02	S
FALSE	High	LALVTGGEIASTFDHPELVK	1x2PCA [N-Term]	1	1	7	P78371	0	2186.15	High	6.02	L
FALSE	High	FNFLAPELPAVSEFSTSETMGHSADR	1x2PCA [N-Term]	1	1	1	P55084	0	2929.35	High	6.01	F
FALSE	High	QAFTDVATGSLGQGLGAACGMAYTGK	1xCarbamidomethyl [C19]; 1xOxidation [M21]; 1x2PCA [N-Term]	1	1	1	P29401	0	2637.21	High	6.01	Q
FALSE	High	ITFTGEADQAPGVEPGDIVLLLQEK	1x2PCA [N-Term]	1	1	2	O60884	0	2729.4	High	6.01	I
FALSE	High	ITAQSIEELCAVNLYGPDAQVDR	1xCarbamidomethyl [C10]; 1x2PCA [N-Term]	1	1	1	P78527	0	2651.28	High	6.01	I
FALSE	High	ICDQISDAVLDAHLQQDPDAK	1xCarbamidomethyl [C2]; 1x2PCA [N-Term]	1	1	3	P31153	0	2441.14	High	6.01	I
FALSE	High	LISLTDENALSGNEELTVK	1x2PCA [N-Term]	1	1	4	P14625	0	2135.09	High	6.01	L
FALSE	High	VATAQDDITGDGTTSNVLIIGELLK	1x2PCA [N-Term]	1	1	6	P40227	0	2633.37	High	6	V
FALSE	High	SADFVVEAIGDDVGTLGFSVEGPSQAK	1x2PCA [N-Term]	1	1	5	P21333	0	2784.34	High	6	S
FALSE	High	EFDYVINDLTAVPISTSPEEDSTWEFLR	1x2PCA [N-Term]	1	1	1	P52788	0	3362.57	High	5.99	E
FALSE	High	AIGSASEGAQSSLQEVYHK	1x2PCA [N-Term]	1	1	2	P28066	0	2050.98	High	5.98	A
FALSE	High	VEQIAAIAQELNELDYYDSPSVNAR	1x2PCA [N-Term]	1	1	3	P12814	0	2897.4	High	5.98	V
FALSE	High	MAAISESNINLCGSHCGVSIGEDGPSQMALEDLAMFR	2xCarbamidomethyl [C12; C16]; 1x2PCA [N-Term]	1	1	5	P29401	0	4056.8	High	5.97	M
FALSE	High	YDQATDTILTVTENIFSSMGDAGEMVR	1x2PCA [N-Term]	1	1	1	Q9Y490	0	3053.39	High	5.97	Y
FALSE	High	MEDSMDMDMSPLRPQNYLFGCELK	1xAcetyl [N-Term]; 1xCarbamidomethyl [C21]	1	1	5	P06748	0	2949.26	High	5.97	M
FALSE	High	YGGPPPDSVYSGVQPGIGTEVFVGK	1x2PCA [N-Term]	1	1	3	O43390	0	2596.27	High	5.97	Y
FALSE	High	IIGLDQVAGMSETALPGAFK	1x2PCA [N-Term]	1	1	5	P35579	0	2107.09	High	5.96	I
FALSE	High	NAIDDGCVVPGAGAVEVAMAEALIK	1xCarbamidomethyl [C7]; 1x2PCA [N-Term]	1	1	7	P40227	0	2559.26	High	5.96	N
FALSE	High	IVAERPGTNSTGPAPMAPPR	1x2PCA [N-Term]	1	1	1	Q13263	0	2108.07	High	5.96	I
FALSE	High	TATESFASDPILYRPVAVALDTK	1x2PCA [N-Term]	1	1	27	P14618	0	2554.32	High	5.96	T
FALSE	High	SGDAAIVDMVPGKPMCVESFSDYPPLGR	1xCarbamidomethyl [C16]; 1x2PCA [N-Term]	1	2	8	P68104	0	3084.43	High	5.95	S
FALSE	High	LMDLDVEQLGIPEQEYSCVVK	1xCarbamidomethyl [C18]; 1x2PCA [N-Term]	1	1	12	P12004	0	2554.22	High	5.95	L
FALSE	High	ISIPVDISDSDMMLNIINSSITTK	1x2PCA [N-Term]	1	1	1	P49368	0	2696.35	High	5.95	I
FALSE	High	EGGLGPLNIPLLADVTR	1x2PCA [N-Term]	1	1	11	P32119	0	1824	High	5.95	E
FALSE	High	LLLEAQAATGFLLDPVK	1x2PCA [N-Term]	1	1	1	Q15149	0	1888.06	High	5.94	L
FALSE	High	LTESPCALVASQYGWSGNMER	1xCarbamidomethyl [C6]; 1x2PCA [N-Term]	1	1	2	P14625	0	2445.1	High	5.94	L
FALSE	High	LIAHAGSLTNLAK	1x2PCA [N-Term]	1	1	1	O00567	0	1397.79	High	5.94	L
FALSE	High	EAESCDCLQGFQLTHSLGGGTGSGMGTLLLSK	2xCarbamidomethyl [C5; C7]; 1x2PCA [N-Term]	2	5	18	P07437; P68371	0	3400.56	High	5.94	E
FALSE	High	LDLWNLNNDTEVPTASISVEGNPALNR	1x2PCA [N-Term]	1	1	2	Q13409	0	3041.5	High	5.94	L
FALSE	High	TDEFQLHTNVNDGTEFGGSIYQK	1x2PCA [N-Term]	1	1	1	P21796	0	2689.22	High	5.94	T
FALSE	High	IYLTADNLVLNLQDESFTR	1x2PCA [N-Term]	1	1	4	Q99623	0	2314.17	High	5.94	I
FALSE	High	GLQAQIASSGLTVEVDAPK	1x2PCA [N-Term]	1	1	4	P05783	0	1973.03	High	5.93	G
FALSE	High	NLSDLIDLVPSLCEDLLSSVDQPLK	1xCarbamidomethyl [C13]; 1x2PCA [N-Term]	1	1	2	P47756	0	2872.46	High	5.93	N
FALSE	High	NDFQLIGIQDGYLSLLQDSGEVR	1x2PCA [N-Term]	1	1	6	P63241	0	2669.32	High	5.93	N
FALSE	High	LPIDVTEGEVISLGLPFGK		1	1	8	P26599	0	1984.1	High	5.93	L
FALSE	High	CPEALFQPSFLGMESCGIHETTFNSIMK	2xCarbamidomethyl [C1; C16]; 1xOxidation [M]	1	2	18	P60709	0	3247.46	High	5.92	C
FALSE	High	FSHEEIAMATVTALR	1x2PCA [N-Term]	1	1	2	P04075	0	1764.87	High	5.92	F
FALSE	High	QTTVSNSQQAYQEAFEISK	1x2PCA [N-Term]	1	1	3	P31946	0	2248.05	High	5.92	Q
FALSE	High	TFSHELSDFGLESTAGEIPVVAIR	1x2PCA [N-Term]	1	1	4	P30101	0	2664.33	High	5.92	T
FALSE	High	LGPGGLDPVEVYESLPEELQK	1x2PCA [N-Term]	1	1	2	Q16543	0	2358.19	High	5.92	L
FALSE	High	IPSAVGYQPTLATDMGTMQER		1	1	5	P06576	0	2266.08	High	5.92	I
FALSE	High	AEDNADTLALVFEAPNQEK	1x2PCA [N-Term]	1	1	6	P12004	0	2164.02	High	5.91	A
FALSE	High	EQLPPMSEDFLLDALSEDFSGPQNASSLK	1x2PCA [N-Term]	1	1	3	P20810	0	3254.52	High	5.91	E
FALSE	High	LEQQVPVNQVFGQDEMIDVIGVTK	1x2PCA [N-Term]	1	1	7	P39023	0	2775.4	High	5.91	L
FALSE	High	ILTATVDNANILLQIDNAR	1x2PCA [N-Term]	1	1	16	Q04695	0	2157.17	High	5.91	I
FALSE	High	YVASYLLAALGGNSSPSAK	1x2PCA [N-Term]	1	1	4	P05387	0	1958	High	5.91	Y
FALSE	High	VPAFEGDDGFCVFESNAIAYYVSNEELR	1xCarbamidomethyl [C11]	1	1	2	P26641	0	3198.44	High	5.91	V
FALSE	High	IEGCIIGFDEYMNLVLDDAEEIHSK	1xCarbamidomethyl [C4]; 1x2PCA [N-Term]	1	1	2	P62304	0	2999.38	High	5.9	I
FALSE	High	ISLGLPVGAVINCADNTGAK	1xCarbamidomethyl [C13]; 1x2PCA [N-Term]	1	1	18	P62829	0	2059.06	High	5.9	I
FALSE	High	TQDQDENVALEACEFWLTLAEQPICK	2xCarbamidomethyl [C13; C25]; 1x2PCA [N-Term]	1	1	3	Q92973	0	3197.46	High	5.9	T
FALSE	High	EGPYDVVVLPGGNLGAQNLSESAAVK	1x2PCA [N-Term]	1	1	6	Q99497	0	2673.35	High	5.9	E
FALSE	High	TTIPEEEEEEEEAAGVVVEEELFHQQGTPR	1x2PCA [N-Term]	1	1	1	P20700	0	3500.6	High	5.9	T
FALSE	High	QAHLCVLASNCDEPMYVK	2xCarbamidomethyl [C5; C11]; 1x2PCA [N-Term]	1	1	3	P25398	0	2224	High	5.89	Q
FALSE	High	LAYVAAGDLAPINAFIGGLAAQEVMK	1xOxidation [M25]; 1x2PCA [N-Term]	1	1	1	P22314	0	2708.41	High	5.89	L
FALSE	High	MLLDPMGGIVMTNDGNAILR	1x2PCA [N-Term]	1	1	4	P49368	0	2220.1	High	5.89	M
FALSE	High	TTHFVEGGDAGNREDQINR		1	1	4	P18124	1	2115.98	High	5.88	T
FALSE	High	ELPTEPPYTAYVGNLPFNTVQGDIDAIFK	1x2PCA [N-Term]	1	1	3	Q15056	0	3298.63	High	5.88	E
FALSE	High	VTDGALVVVDCVSGVCVQTETVLR	2xCarbamidomethyl [C11; C16]; 1x2PCA [N-Term]	1	1	3	P13639	0	2665.33	High	5.87	V
FALSE	High	ILATGANVILTTGGIDDMCLK	1xCarbamidomethyl [C19]; 1x2PCA [N-Term]	1	1	4	P17987	0	2265.16	High	5.87	I
FALSE	High	LDINLLDNVVNCLYHGEGAQQR	1xCarbamidomethyl [C12]; 1x2PCA [N-Term]	1	1	3	O14980	0	2630.28	High	5.86	L
FALSE	High	HEAFESDLAAHQDR	1x2PCA [N-Term]	2	4	1	P12814; O43707	0	1714.76	High	5.86	H
FALSE	High	FALGIFAINEAVESGDVGK	1x2PCA [N-Term]	1	1	2	P46940	0	2026.03	High	5.86	F
FALSE	High	QLTEMLPSILNQLGADSLTSLR	1x2PCA [N-Term]	1	1	1	P20290	0	2489.31	High	5.85	Q
FALSE	High	LLEDGEDFNLGDALDSSNSMQTIQK	1x2PCA [N-Term]	1	1	14	P05783	0	2829.29	High	5.85	L
FALSE	High	FDVNTSAVQVLIEHIGNLDR	1x2PCA [N-Term]	1	1	2	Q00610	0	2329.19	High	5.85	F
FALSE	High	YASICQQNGIVPIVEPEILPDGDHDLK	1xCarbamidomethyl [C5]; 1x2PCA [N-Term]	2	2	13	P04075; P09972	0	3109.53	High	5.85	Y
FALSE	High	ILTSVDQYLELIGNSLPGTTAK	1x2PCA [N-Term]	1	1	1	Q96TA1	0	2422.29	High	5.85	I
FALSE	High	FGQAATMEGIGAIGGTPPAFNR	1x2PCA [N-Term]	1	1	1	Q15233	0	2252.09	High	5.84	F
FALSE	High	QATVGDINTERPGMLDFTGK	1x2PCA [N-Term]	1	1	2	P07108	0	2239.08	High	5.84	Q
FALSE	High	VEQIAAIAQELNELDYYDSHNVNTR	1x2PCA [N-Term]	1	1	5	O43707	0	2994.42	High	5.84	V
FALSE	High	TAFDEAIAELDTLNEESYK	1x2PCA [N-Term]	1	1	11	P31946	0	2248.03	High	5.83	T
FALSE	High	ILATPPQEDAPSVDIANIR	1x2PCA [N-Term]	1	1	14	P29401	0	2109.1	High	5.82	I
FALSE	High	SALSGHLETVILGLLK	1x2PCA [N-Term]	1	2	7	P07355	0	1740.01	High	5.82	S
FALSE	High	AAAPAPEEEMDECEQALAAEPK	1xCarbamidomethyl [C13]; 1x2PCA [N-Term]	1	1	7	P26641	0	2446.05	High	5.82	A
FALSE	High	ICALDDNVCMAFAGLTADAR	2xCarbamidomethyl [C2; C9]; 1x2PCA [N-Term]	1	1	3	O14818	0	2273.01	High	5.82	I
FALSE	High	MHDLNTDQENLVGTHDAPIR	1x2PCA [N-Term]	1	1	1	O43684	0	2365.1	High	5.81	M
FALSE	High	IEGYEDQVLITEHGDLGNSR	1x2PCA [N-Term]	1	1	1	P52907	0	2334.1	High	5.81	I
FALSE	High	DLIADSNPMVVANAVAALSEISESHPNSNLLDLNPQNINK	1x2PCA [N-Term]	1	1	1	P63010	0	4317.15	High	5.81	D
FALSE	High	VLSRPNAQELPSMYQR	1x2PCA [N-Term]	1	1	1	Q99623	0	1978	High	5.81	V
FALSE	High	LPYDVTPEQALAHEEVK		1	1	2	P46940	0	1938.98	High	5.81	L
FALSE	High	SYDVPPPPMEPDHPFYSNISK	1x2PCA [N-Term]	1	2	5	P18669	0	2506.14	High	5.8	S
FALSE	High	VPADTEVVCAPPTAYIDFAR	1xCarbamidomethyl [C9]	1	1	10	P60174	0	2192.07	High	5.8	V
FALSE	High	EQDQRPLHPVANPHAEISTK	1x2PCA [N-Term]	1	1	1	Q9NX58	0	2356.18	High	5.8	E
FALSE	High	LCYVALDFEQEMATAASSSSLEK	1xCarbamidomethyl [C2]; 1xOxidation [M12]; 1x2PCA [N-Term]	1	3	9	P60709	0	2655.2	High	5.79	L
FALSE	High	ALMLQGVDLLADAVAVTMGPK	1xOxidation [M18]; 1x2PCA [N-Term]	1	1	2	P10809	0	2218.16	High	5.79	A
FALSE	High	RPELLTHSTTEVTQPR		1	1	3	P78347	0	1864.99	High	5.79	R
FALSE	High	VLILGSGGLSIGQAGEFDYSGSQAVK	1x2PCA [N-Term]	1	1	4	P31327	0	2642.35	High	5.78	V
FALSE	High	AQGPAASAEEPKPVEAPAANSDQTVTVKE	1x2PCA [N-Term]	1	1	2	P80723	1	2981.45	High	5.78	A
FALSE	High	LASEILMQNWDAAMEDLTR	1x2PCA [N-Term]	1	1	2	P60228	0	2296.07	High	5.78	L
FALSE	High	KGVNLPGAAVDLPAVSEK	1x2PCA [N-Term]	1	1	5	P14618	1	1854.01	High	5.78	K
FALSE	High	TTPYQIACGISQGLADNTVIAK	1xCarbamidomethyl [C8]; 1x2PCA [N-Term]	1	1	1	P26639	0	2410.21	High	5.78	T
FALSE	High	QVEPLDPPAGSAPGEHVFVK	1x2PCA [N-Term]	1	1	1	P54577	0	2163.09	High	5.77	Q
FALSE	High	ICPVETLVEEAIQCAEK	2xCarbamidomethyl [C2; C14]; 1x2PCA [N-Term]	1	1	5	P30084	0	2077.99	High	5.77	I
FALSE	High	DGEDQTQDTELVETRPAGDGTFQK	1x2PCA [N-Term]	1	3	2	P04439	0	2726.22	High	5.77	D
FALSE	High	VLNNMEIGTSLFDEEGAK	1x2PCA [N-Term]	1	1	14	P00558	0	2055.97	High	5.77	V
FALSE	High	EQYEQILAFVQGTVAEGAPIIPISAQLK	1x2PCA [N-Term]	1	2	1	P41091	0	3102.65	High	5.77	E
FALSE	High	MRPGVACSVSQAQK	1xCarbamidomethyl [C7]; 1x2PCA [N-Term]	1	1	4	P32969	0	1607.78	High	5.76	M
FALSE	High	LNEDMACSVAGITSDANVLTNELR	1xCarbamidomethyl [C7]; 1x2PCA [N-Term]	1	1	4	P25789	0	2682.25	High	5.76	L
FALSE	High	VHSPSGALEECYVTEIDQDK	1xCarbamidomethyl [C11]; 1x2PCA [N-Term]	1	1	1	P21333	0	2366.06	High	5.76	V
FALSE	High	LCDFGVSGQLIDSMANSFVGTR	1xCarbamidomethyl [C2]; 1x2PCA [N-Term]	1	2	2	P36507	0	2463.14	High	5.76	L
FALSE	High	TQLEELEDELQATEDAK	1x2PCA [N-Term]	1	3	1	P35579	0	2050.95	High	5.76	T
FALSE	High	FIECYIAEQNMVSIAVGCATR	2xCarbamidomethyl [C4; C18]; 1x2PCA [N-Term]	1	1	2	P29401	0	2521.17	High	5.75	F
FALSE	High	QNFTEPTAIQAQGWPVALSGLDMVGVAQTGSGK	1x2PCA [N-Term]	1	1	1	P17844	0	3447.7	High	5.75	Q
FALSE	High	FSFSGNTLVSSSADPEGHFETPIWIER	1x2PCA [N-Term]	1	1	2	Q14697	0	3099.45	High	5.74	F
FALSE	High	MAQLLDLSVDESEAFLSNLVVNK	1x2PCA [N-Term]	1	1	2	O00232	0	2624.33	High	5.74	M
FALSE	High	ITVVGVGQVGMACAISILGK	1xCarbamidomethyl [C13]; 1x2PCA [N-Term]	1	1	4	P07195	0	2062.12	High	5.73	I
FALSE	High	DNHLLGTFDLTGIPPAPR	1x2PCA [N-Term]	1	1	3	P11021	0	2023.04	High	5.73	D
FALSE	High	SENGLEFTSSGSANTETTK	1x2PCA [N-Term]	1	1	3	P21796	0	2048.9	High	5.73	S
FALSE	High	IATSLDGFDVASVQQQR	1x2PCA [N-Term]	1	1	3	O60664	0	1923.96	High	5.73	I
FALSE	High	YAICSALAASALPALVMSK	1xCarbamidomethyl [C4]; 1x2PCA [N-Term]	1	1	8	P36578	0	2026.05	High	5.73	Y
FALSE	High	ITAFVPNDGCLNFIEENDEVLVAGFGR	1xCarbamidomethyl [C10]; 1x2PCA [N-Term]	1	1	2	P62266	0	3085.47	High	5.72	I
FALSE	High	RAEDGSVIDYELIDQDAR	1x2PCA [N-Term]	1	1	6	P07355	1	2154.01	High	5.72	R
FALSE	High	FDTGNLCMVTGGANLGR	1xCarbamidomethyl [C7]; 1x2PCA [N-Term]	1	1	4	P62701	0	1871.85	High	5.72	F
FALSE	High	TAFDDAIAELDTLNEDSYK	1x2PCA [N-Term]	1	1	7	P61981	0	2220	High	5.72	T
FALSE	High	TDQVIQSLIALVNDPQPEHPLR	1x2PCA [N-Term]	1	2	3	P68036	0	2572.35	High	5.72	T
FALSE	High	ALQSGQCAGAALDVFTEEPPRDR	1xCarbamidomethyl [C7]; 1x2PCA [N-Term]	1	1	3	O43175	1	2577.22	High	5.71	A
FALSE	High	HALLEADVAAHQDR	1x2PCA [N-Term]	1	1	1	Q13813	0	1634.8	High	5.71	H
FALSE	High	EAMQQADDWLGVPQVITPEEIIHPDVDEHSVMTYLSQFPK	1x2PCA [N-Term]	1	1	2	O75369	0	4682.22	High	5.71	E
FALSE	High	FDENDVITCFANFESDEVELSYAK	1xCarbamidomethyl [C9]; 1x2PCA [N-Term]	1	1	8	Q00839	0	2931.27	High	5.71	F
FALSE	High	QPYAVSELAGHQTSAESWGTGR		1	1	4	P36578	0	2332.1	High	5.71	Q
FALSE	High	LEGVLAEVAQHYQDTLIR	1x2PCA [N-Term]	1	1	3	P46940	0	2144.11	High	5.71	L
FALSE	High	IYDDDFFQNLDGVANALDNVDAR	1x2PCA [N-Term]	1	1	5	P22314	0	2689.22	High	5.71	I
FALSE	High	LLSSAFDEVYPALPSDVQTAIK	1x2PCA [N-Term]	1	1	4	O00410	0	2453.26	High	5.71	L
FALSE	High	EGSGIGAIDSNLDWSHNFTNMLGYTDHQFTELTR	1x2PCA [N-Term]	1	1	1	O75390	0	3915.77	High	5.7	E
FALSE	High	LDLNGNTLGEEGCEQLQEVLEGFNMAK	1xCarbamidomethyl [C13]; 1x2PCA [N-Term]	1	1	1	P46060	0	3097.42	High	5.7	L
FALSE	High	IGFPETTEEELEEIASENSDCIFPSAPDVK	1xCarbamidomethyl [C21]; 1x2PCA [N-Term]	1	1	3	Q9Y3F4	0	3442.55	High	5.68	I
FALSE	High	AAELIANSLATAGDGLIELR	1x2PCA [N-Term]	1	1	10	P35232	0	2087.11	High	5.68	A
FALSE	High	LLGGVTIAQGGVLPNIQAVLLPK	1x2PCA [N-Term]	2	3	4	Q8IUE6; P16104	0	2360.41	High	5.68	L
FALSE	High	EGRPSGEAFVELESEDEVK	1x2PCA [N-Term]	1	1	1	P31943	0	2196.01	High	5.68	E
FALSE	High	FLSQPFQVAEVFTGHMGK	1x2PCA [N-Term]	1	1	5	P06576	0	2112.04	High	5.68	F
FALSE	High	ILGQEGDASYLASEISTWDGVIVTPSEK	1x2PCA [N-Term]	1	1	4	Q12905	0	3054.49	High	5.68	I
FALSE	High	DATNVGDEGGFAPNILENK	1x2PCA [N-Term]	1	1	12	P06733	0	2049.95	High	5.68	D
FALSE	High	QGQIIYNWQGAQSTQDEVAASAILTAQLDEELGGTPVQSR	1x2PCA [N-Term]	1	1	2	P06396	0	4362.13	High	5.68	Q
FALSE	High	LVTSPCCIVTSTYGWTANMER	2xCarbamidomethyl [C6; C7]; 1x2PCA [N-Term]	1	1	7	P07900	0	2535.15	High	5.67	L
FALSE	High	TVLGTPEVLLGALPGAGGTQR	1x2PCA [N-Term]	1	1	1	P40939	0	2096.15	High	5.67	T
FALSE	High	AIPDLTAPVAAVQAAVSNLVR	1x2PCA [N-Term]	1	1	1	P18206	0	2165.21	High	5.67	A
FALSE	High	MSVQPTVSLGGFEITPPVVLR	1x2PCA [N-Term]	1	1	21	P06748	0	2316.24	High	5.67	M
FALSE	High	LNFSHGTHEYHAETIK	1x2PCA [N-Term]	1	1	13	P14618	0	1972.93	High	5.66	L
FALSE	High	VEGTEPTTAFNLFVGNLNFNK	1x2PCA [N-Term]	1	1	13	P19338	0	2401.18	High	5.66	V
FALSE	High	TLLPLLLESSTESVAEISSNSLER	1x2PCA [N-Term]	1	1	1	Q5T4S7	0	2677.39	High	5.66	T
FALSE	High	YMNPAIVAPDAFDIIDLSAGGQLTTDQR	1x2PCA [N-Term]	1	1	1	P46940	0	3081.5	High	5.65	Y
FALSE	High	TVTNAVVTVPAYFNDSQR	1x2PCA [N-Term]	1	1	12	P11142	0	2071.02	High	5.65	T
FALSE	High	IQQLVQDIASLTLLEISDLNELLK	1x2PCA [N-Term]	1	1	1	P52815	0	2798.55	High	5.64	I
FALSE	High	KPLPDHVSIVEPK		1	1	8	P23396	0	1458.83	High	5.64	K
FALSE	High	TAFDEAIAELDTLSEESYK	1x2PCA [N-Term]	1	1	13	P63104	0	2221.02	High	5.64	T
FALSE	High	SYIEGYVPSQADVAVFEAVSSPPPADLCHALR	1xCarbamidomethyl [C28]; 1x2PCA [N-Term]	1	1	1	P24534	0	3534.7	High	5.64	S
FALSE	High	AGTQIENIDEDFRDGLK	1x2PCA [N-Term]	1	1	2	O43707	1	2009.96	High	5.64	A
FALSE	High	MIAGQVLDINLAAEPK	1x2PCA [N-Term]	1	1	8	P07910	0	1771.94	High	5.64	M
FALSE	High	HLYTLDGGDIINALCFSPNR	1xCarbamidomethyl [C15]; 1x2PCA [N-Term]	1	1	1	P63244	0	2365.14	High	5.64	H
FALSE	High	LLDFGSLSNLQVTQPTVGMNFK	1x2PCA [N-Term]	1	1	8	P08708	0	2498.27	High	5.63	L
FALSE	High	LLEDGEDFNLGDALDSSNSMQTIQK	1xOxidation [M20]; 1x2PCA [N-Term]	1	1	2	P05783	0	2845.28	High	5.63	L
FALSE	High	EAATLEVERPLPMEVEK	1x2PCA [N-Term]	1	1	4	P51858	0	2030.03	High	5.63	E
FALSE	High	HLEINPDHPIVETLR	1x2PCA [N-Term]	1	1	7	P08238	0	1871.98	High	5.63	H
FALSE	High	AEPPQCTSLAWSADGQTLFAGYTDNLVR	1xCarbamidomethyl [C6]; 1x2PCA [N-Term]	1	1	3	P63244	0	3157.47	High	5.62	A
FALSE	High	FQDTAEALAAFTALMEGK	1x2PCA [N-Term]	1	1	2	Q9Y2X3	0	2002.96	High	5.62	F
FALSE	High	DLLLTSSYLSDSGSTGEHTK	1x2PCA [N-Term]	1	1	4	P08195	0	2200.04	High	5.62	D
FALSE	High	LGQSDPAPLQHQMDIYQK	1x2PCA [N-Term]	1	1	6	P29401	0	2158.04	High	5.61	L
FALSE	High	EIYCPAPPQIDNGIIQGER	1xCarbamidomethyl [C4]; 1x2PCA [N-Term]	1	1	5	P08174	0	2259.09	High	5.6	E
FALSE	High	ALLELQLEPEELYQTFQR	1x2PCA [N-Term]	1	1	14	P13639	0	2309.18	High	5.6	A
FALSE	High	AEISELPSIVQDLANGNITWADVEAR	1x2PCA [N-Term]	1	1	1	P41250	0	2900.44	High	5.6	A
FALSE	High	ILLDQVEEAVADFDECIR	1xCarbamidomethyl [C16]; 1x2PCA [N-Term]	1	1	1	O94826	0	2224.06	High	5.6	I
FALSE	High	ALSVGNIDDALQCYSEAIK	1xCarbamidomethyl [C13]; 1x2PCA [N-Term]	1	1	3	P31948	0	2156.03	High	5.59	A
FALSE	High	SCSGVEFSTSGSSNTDTGK	1xCarbamidomethyl [C2]; 1x2PCA [N-Term]	1	1	2	P45880	0	1996.82	High	5.59	S
FALSE	High	VAPEEHPVLLTEAPLNPK		1	2	7	P60709	0	1954.06	High	5.59	V
FALSE	High	TMQALEIELQSQLSMK	1x2PCA [N-Term]	1	1	7	Q04695	0	1938.97	High	5.59	T
FALSE	High	YVEPIEDVPCGNIVGLVGVDQFLVK	1xCarbamidomethyl [C10]; 1x2PCA [N-Term]	1	1	9	P13639	0	2848.46	High	5.59	Y
FALSE	High	LQAYHTQTTPLIEYYR	1x2PCA [N-Term]	1	1	1	P54819	0	2086.04	High	5.59	L
FALSE	High	LLLQGEADQSLLTFIDK	1x2PCA [N-Term]	1	1	6	P78527	0	1993.06	High	5.58	L
FALSE	High	LATQSNEITIPVTFESR	1x2PCA [N-Term]	1	1	5	P04792	0	1995.02	High	5.58	L
FALSE	High	SELHIENLNMEADPGQYR	1x2PCA [N-Term]	1	1	1	P35613	0	2205	High	5.57	S
FALSE	High	FYPEDVSEELIQDITQR	1x2PCA [N-Term]	1	1	11	P26038	0	2171.03	High	5.57	F
FALSE	High	VEAAIALQVLISNQEK	1x2PCA [N-Term]	1	1	3	O95373	0	1815	High	5.56	V
FALSE	High	SGVISDTELQQALSNGTWTPFNPVTVR	1x2PCA [N-Term]	1	1	1	O75340	0	3006.5	High	5.56	S
FALSE	High	CDVTQSQPLGAVPLPPADCVLSTLCLDAACPDLPTYCR	5xCarbamidomethyl [C1; C19; C25; C30; C37]; 1x2PCA [N-Term]	1	1	1	P40261	0	4319.99	High	5.56	C
FALSE	High	VEAPSLDVHMDSPDINIEGPDVK	1x2PCA [N-Term]	1	1	1	Q09666	0	2566.21	High	5.55	V
FALSE	High	EAILNDEIYCPPETAVLLASYAVQAK	1xCarbamidomethyl [C10]; 1x2PCA [N-Term]	1	1	3	P35241	0	2967.48	High	5.55	E
FALSE	High	TELEDTLDSTAAQQELR	1x2PCA [N-Term]	1	1	1	P35579	0	2008.95	High	5.55	T
FALSE	High	ILTEAEIDAHLVALAERD	1x2PCA [N-Term]	1	1	2	P60900	1	2068.07	High	5.54	I
FALSE	High	AAEAAAAPAESAAPAAGEEPSK	1x2PCA [N-Term]	1	1	7	P80723	0	2055.96	High	5.54	A
FALSE	High	DQVTAQEIFQDNHEDGPTAK	1x2PCA [N-Term]	1	1	4	P13010	0	2332.05	High	5.54	D
FALSE	High	VETGVLKPGMVVTFAPVNVTTEVK	1x2PCA [N-Term]	1	2	16	P68104	0	2604.41	High	5.54	V
FALSE	High	AHLMEIQVNGGTVAEK	1x2PCA [N-Term]	1	1	3	P39023	0	1785.9	High	5.53	A
FALSE	High	ATQQQHDFTLTQTADGR	1x2PCA [N-Term]	1	1	2	P78527	0	2006.93	High	5.53	A
FALSE	High	TGVHHYSGNNIELGTACGK	1xCarbamidomethyl [C17]	1	1	2	P62888	0	2014.94	High	5.53	T
FALSE	High	AEDGSVIDYELIDQDAR	1x2PCA [N-Term]	1	1	10	P07355	0	1997.91	High	5.53	A
FALSE	High	QLSSSVTGLTNIEEENCQR	1xCarbamidomethyl [C17]; 1x2PCA [N-Term]	1	1	2	P46940	0	2254.04	High	5.53	Q
FALSE	High	AQGPAASAEEPKPVEAPAANSDQTVTVK	1x2PCA [N-Term]	1	1	4	P80723	0	2852.41	High	5.52	A
FALSE	High	HGLLVPNNTTDQELQHIR	1x2PCA [N-Term]	1	1	1	P56537	0	2174.11	High	5.52	H
FALSE	High	VETELQGVCDTVLGLLDSHLIK	1xCarbamidomethyl [C9]; 1x2PCA [N-Term]	1	1	4	P31947	0	2528.31	High	5.52	V
FALSE	High	LVAEVSLQNPLPVALEGCTFTVEGAGLTEEQK	1xCarbamidomethyl [C18]; 1x2PCA [N-Term]	1	1	2	P21980	0	3488.76	High	5.52	L
FALSE	High	MCLAADVPLIESGTAGYLGQVTTIK	1xCarbamidomethyl [C2]; 1x2PCA [N-Term]	1	1	1	Q9UBT2	0	2697.36	High	5.52	M
FALSE	High	DLYANTVLSGGTTMYPGIADR		1	2	3	P60709	0	2215.07	High	5.52	D
FALSE	High	VHSPSGAVEECHVSELEPDK	1xCarbamidomethyl [C11]; 1x2PCA [N-Term]	1	1	4	O75369	0	2295.03	High	5.51	V
FALSE	High	APVAGTCYQAEWDDYVPK	1xCarbamidomethyl [C7]	1	1	3	P30086	0	2069.93	High	5.51	A
FALSE	High	NSNLVGAAHEELQQSR	1x2PCA [N-Term]	1	1	9	P02545	0	1841.89	High	5.5	N
FALSE	High	LGFSEVELVQMVVDGVK	1x2PCA [N-Term]	1	1	1	P12277	0	1938	High	5.5	L
FALSE	High	RPPEPTTPWQEDPEPEDENLYEK		1	1	1	Q9NX14	0	2796.26	High	5.5	R
FALSE	High	SNIHCNTIAPNAGSR	1xCarbamidomethyl [C5]; 1x2PCA [N-Term]	1	1	1	P51659	0	1700.79	High	5.5	S
FALSE	High	DYPVVSIEDPFDQDDWGAWQK	1x2PCA [N-Term]	1	1	22	P06733	0	2599.14	High	5.5	D
FALSE	High	ELGAFGLQVPSELGGVGLCNTQYAR	1xCarbamidomethyl [C19]; 1x2PCA [N-Term]	1	1	1	P49748	0	2725.34	High	5.5	E
FALSE	High	ALESPERPFLAILGGAK	1x2PCA [N-Term]	1	1	21	P00558	0	1858.02	High	5.5	A
FALSE	High	LGGLTQAPGNPVLAVQINQDK	1x2PCA [N-Term]	1	1	1	P26368	0	2222.19	High	5.49	L
FALSE	High	LSLDGQNIYNACCTLR	2xCarbamidomethyl [C12; C13]; 1x2PCA [N-Term]	1	1	2	P26599	0	1986.92	High	5.48	L
FALSE	High	FDTLCDLYDTLTITQAVIFCNTK	2xCarbamidomethyl [C5; C20]; 1x2PCA [N-Term]	1	1	1	P38919	0	2841.35	High	5.48	F
FALSE	High	EFFPLDESGNVVPSDTNILDTWAAMEELVDEGLVK	1x2PCA [N-Term]	1	1	1	P15121	0	3968.88	High	5.48	E
FALSE	High	LSDFNDITNMLLLK	1x2PCA [N-Term]	1	1	4	P78527	0	1725.89	High	5.48	L
FALSE	High	IEDLSQQAQLAAAEK	1x2PCA [N-Term]	1	2	4	Q13765	0	1703.86	High	5.48	I
FALSE	High	FDGALNVDLTEFQTNLVPYPR	1x2PCA [N-Term]	2	7	15	Q71U36; P68366	0	2498.24	High	5.47	F
FALSE	High	VFIMDNCEELIPEYLNFIR	1xCarbamidomethyl [C7]; 1x2PCA [N-Term]	1	1	3	P07900	0	2504.2	High	5.47	V
FALSE	High	YLLQYQEPIPCEQLVTALCDIK	2xCarbamidomethyl [C11; C19]; 1x2PCA [N-Term]	1	1	6	P25789	0	2783.38	High	5.47	Y
FALSE	High	LALMLNDMELVEDIFTSCK	1xCarbamidomethyl [C18]; 1x2PCA [N-Term]	1	1	2	Q13200	0	2331.11	High	5.45	L
FALSE	High	VAEVLFDAADANAIEEVNLAYENVK	1x2PCA [N-Term]	1	1	2	Q14204	0	2796.37	High	5.45	V
FALSE	High	ILLQGTPVAQMTEDAVDAER	1x2PCA [N-Term]	1	1	18	P01024	0	2246.11	High	5.45	I
FALSE	High	FNEEHIPDSPFVVPVASPSGDAR	1x2PCA [N-Term]	1	1	1	P21333	0	2556.22	High	5.45	F
FALSE	High	AIVAIENPADVSVISSR	1x2PCA [N-Term]	1	1	10	P08865	0	1829.98	High	5.44	A
FALSE	High	EEFASTCPDDEEIELAYEQVAK	1xCarbamidomethyl [C7]; 1x2PCA [N-Term]	1	1	4	O00299	0	2662.15	High	5.44	E
FALSE	High	KPVVNIITPSHVEER		1	1	3	Q16719	0	1717.96	High	5.44	K
FALSE	High	APLATGEDDDDEVPDLVENFDEASK		1	1	3	P20290	0	2691.18	High	5.44	A
FALSE	High	AQFAQPEILIGTIPGAGGTQR	1x2PCA [N-Term]	1	1	2	P30084	0	2214.17	High	5.44	A
FALSE	High	EEIVQFFSGLEIVPNGITLPVDFQGR	1x2PCA [N-Term]	1	1	1	P31943	0	2993.54	High	5.44	E
FALSE	High	AEISCTDNQDGTCSVSYLPVLPGDYSILVK	2xCarbamidomethyl [C5; C13]; 1x2PCA [N-Term]	1	1	2	P21333	0	3390.59	High	5.44	A
FALSE	High	LALADAGDTVEDANFVEAMADAGILR	1x2PCA [N-Term]	1	1	1	Q9P2J5	0	2737.31	High	5.44	L
FALSE	High	NMAEQIIQEIYSQIQSK	1x2PCA [N-Term]	1	1	5	P29401	0	2112.04	High	5.43	N
FALSE	High	HEQNIDCGGGYVK	1xCarbamidomethyl [C7]; 1x2PCA [N-Term]	1	1	8	P27797	0	1565.68	High	5.43	H
FALSE	High	LLQDSVDFSLADAINTEFK	1x2PCA [N-Term]	1	1	13	P08670	0	2215.09	High	5.43	L
FALSE	High	VEQLFQVMNGILAQDSACSQR	1xCarbamidomethyl [C18]; 1x2PCA [N-Term]	1	1	1	P78527	0	2483.18	High	5.43	V
FALSE	High	LVAGEMGQNEPDQGGQR	1x2PCA [N-Term]	1	1	1	Q99714	0	1874.84	High	5.43	L
FALSE	High	IVGYFVSGCDPSIMGIGPVPAISGALK	1xCarbamidomethyl [C9]; 1x2PCA [N-Term]	1	1	2	P42765	0	2794.43	High	5.43	I
FALSE	High	TYALFIGDTVLVDEDGPATVLTSVK	1x2PCA [N-Term]	1	1	3	Q9Y5B9	0	2713.4	High	5.43	T
FALSE	High	IHVSDQELQSANASVDDSR	1x2PCA [N-Term]	1	1	1	P22314	0	2160	High	5.42	I
FALSE	High	IINEPTAAAIAYGLDK	1x2PCA [N-Term]	2	4	33	P11142; P11021	0	1748.92	High	5.42	I
FALSE	High	SLYQSAGVAPESFEYIEAHGTGTK	1x2PCA [N-Term]	1	1	1	P49327	0	2631.24	High	5.41	S
FALSE	High	ELDLSNNCLGDAGILQLVESVR	1xCarbamidomethyl [C8]; 1x2PCA [N-Term]	1	1	2	P13489	0	2504.24	High	5.41	E
FALSE	High	VNDGVCDCCDGTDEYNSGVICENTCK	5xCarbamidomethyl [C6; C8; C9; C21; C25]; 1x2PCA [N-Term]	1	1	1	P14314	0	3130.16	High	5.41	V
FALSE	High	HLAGLGLTEAIDK	1x2PCA [N-Term]	1	1	1	P50454	0	1426.77	High	5.41	H
FALSE	High	RGAPAAATAPAPTAHK	1x2PCA [N-Term]	1	1	2	Q92522	1	1576.83	High	5.41	R
FALSE	High	VFIMDSCDELIPEYLNFIR	1xCarbamidomethyl [C7]; 1x2PCA [N-Term]	1	1	3	P08238	0	2463.17	High	5.41	V
FALSE	High	VLSEDEEDVDFDIIHNANDTFTVK	1x2PCA [N-Term]	1	1	4	O75369	0	2854.31	High	5.41	V
FALSE	High	LLETIDQLYLEYAK	1x2PCA [N-Term]	1	1	1	P12814	0	1800.94	High	5.41	L
FALSE	High	LGGSLADSYLDEGFLLDK	1x2PCA [N-Term]	1	1	6	P78371	0	2001.98	High	5.41	L
FALSE	High	ILLSVVSMLAEPNDESGANVDASK	1x2PCA [N-Term]	1	1	1	P60604	0	2548.26	High	5.41	I
FALSE	High	NNNIDAAIENIENMLTSENK	1x2PCA [N-Term]	1	1	3	P42704	0	2336.08	High	5.4	N
FALSE	High	FGVEQDVDMVFASFIR	1x2PCA [N-Term]	1	1	4	P14618	0	1948.93	High	5.4	F
FALSE	High	SLVASLAEPDFVVTDFAK	1x2PCA [N-Term]	1	1	12	P22314	0	1998.02	High	5.4	S
FALSE	High	DQFPEVYVPTVFENYVADIEVDGK	1x2PCA [N-Term]	1	1	4	P61586	0	2862.35	High	5.4	D
FALSE	High	FNAHGDANTIVCNSK	1xCarbamidomethyl [C12]; 1x2PCA [N-Term]	1	1	5	P09382	0	1736.78	High	5.4	F
FALSE	High	LAGTQPLEVLEAVQR	1x2PCA [N-Term]	1	1	14	P22314	0	1712.93	High	5.39	L
FALSE	High	IHFPLATYAPVISAEK	1x2PCA [N-Term]	2	6	54	Q71U36; P68366	0	1845.99	High	5.39	I
FALSE	High	IMTTLSVLLGVDLGSMDEEEEIATPPPPPPPK	1x2PCA [N-Term]	1	1	2	P31948	0	3462.74	High	5.38	I
FALSE	High	IMDPNIVGSEHYDVAR	1x2PCA [N-Term]	1	1	8	P06576	0	1904.9	High	5.38	I
FALSE	High	SQDAEVGDGTTSVTLLAAEFLK	1x2PCA [N-Term]	1	1	2	Q99832	0	2341.16	High	5.38	S
FALSE	High	EEILENWNMFVGSQATNYGEDLTK	1x2PCA [N-Term]	1	1	1	Q15293	0	2877.3	High	5.38	E
FALSE	High	VLTCTDLEQGPNFFLDFENAQPTESEK	1xCarbamidomethyl [C4]; 1x2PCA [N-Term]	1	1	3	Q9NUQ9	0	3218.46	High	5.37	V
FALSE	High	QYSPLLAAFTTQGQSELTLLLK	1x2PCA [N-Term]	1	1	1	Q7L1Q6	0	2511.35	High	5.37	Q
FALSE	High	LLNQLQYCEEAGIPLVAIIGEQELK	1xCarbamidomethyl [C8]; 1x2PCA [N-Term]	1	1	2	P12081	0	2930.53	High	5.37	L
FALSE	High	AHQVVEDGYEFFAK	1x2PCA [N-Term]	2	3	1	P62136; P62140	0	1728.8	High	5.37	A
FALSE	High	LLGTIYTAAEEIEAVGGK	1x2PCA [N-Term]	1	1	1	Q6YN16	0	1924.01	High	5.37	L
FALSE	High	FGNPLLVQDVESYDPVLNPVLNR	1x2PCA [N-Term]	1	1	4	Q14204	0	2687.38	High	5.37	F
FALSE	High	LAALNPESNTAGLDIFAK	1x2PCA [N-Term]	1	1	9	O00299	0	1934	High	5.37	L
FALSE	High	FNWNHCGEMAPACK	2xCarbamidomethyl [C6; C13]; 1x2PCA [N-Term]	1	1	3	P15328	0	1810.72	High	5.37	F
FALSE	High	EALAQTVLAEVPTQLVSYFR	1x2PCA [N-Term]	1	1	1	Q99829	0	2324.23	High	5.36	E
FALSE	High	KHPDASVNFSEFSK	1x2PCA [N-Term]	1	1	2	P09429	1	1681.8	High	5.36	K
FALSE	High	EGPYSISVLYGDEEVPR	1x2PCA [N-Term]	1	1	3	P21333	0	1998.94	High	5.36	E
FALSE	High	EQGYDVIAYLANIGQK	1x2PCA [N-Term]	1	1	2	P00966	0	1870.93	High	5.35	E
FALSE	High	TTGIVMDSGDGVTHTVPIYEGYALPHAILR		1	2	2	P60709	0	3183.61	High	5.35	T
FALSE	High	LAATNALLNSLEFTK	1x2PCA [N-Term]	1	1	4	Q14974	0	1694.91	High	5.34	L
FALSE	High	LVQDVANNTNEEAGDGTTTATVLAR		1	1	2	P10809	0	2560.25	High	5.34	L
FALSE	High	VTHAVVTVPAYFNDAQR	1x2PCA [N-Term]	1	1	7	P11021	0	1977	High	5.34	V
FALSE	High	LSENNIQTIFAVTEEFQPVYK	1x2PCA [N-Term]	1	1	3	P05556	0	2559.28	High	5.34	L
FALSE	High	VLLVSPELQAAVEEILPSLK	1x2PCA [N-Term]	1	1	2	O14975	0	2237.28	High	5.34	V
FALSE	High	STNGDTFLGGEDFDQALLR	1x2PCA [N-Term]	1	1	3	P38646	0	2144.99	High	5.34	S
FALSE	High	AGAIAPCEVTVPAQNTGLGPEK	1xCarbamidomethyl [C7]; 1x2PCA [N-Term]	1	2	7	P05388	0	2269.13	High	5.34	A
FALSE	High	IFYPEIEEVQALDDTER	1x2PCA [N-Term]	1	1	11	P33316	0	2156.02	High	5.33	I
FALSE	High	SDSFENPVLQQHFR	1x2PCA [N-Term]	1	1	2	P12956	0	1792.84	High	5.33	S
FALSE	High	YTPVQQGPVGVNVTYGGDPIPK	1x2PCA [N-Term]	1	1	2	P21333	0	2375.2	High	5.33	Y
FALSE	High	LALQQDLTSMAPGLVIQAVR	1x2PCA [N-Term]	1	1	1	O94905	0	2213.21	High	5.33	L
FALSE	High	HPDASVNFSEFSK		1	1	2	P09429	0	1464.68	High	5.33	H
FALSE	High	ALNALCDGLIDELNQALK	1xCarbamidomethyl [C6]; 1x2PCA [N-Term]	1	1	8	P30084	0	2060.05	High	5.33	A
FALSE	High	MDPNCSCAAGDSCTCAGSCK	1xAcetyl [N-Term]; 5xCarbamidomethyl [C5; C7; C13; C15; C19]	1	1	3	P02795	0	2250.76	High	5.33	M
FALSE	High	LVQIEYALAAVAGGAPSVGIK	1x2PCA [N-Term]	1	1	3	P25787	0	2116.18	High	5.32	L
FALSE	High	DQEGQDVLLFIDNIFR	1x2PCA [N-Term]	1	1	1	P06576	0	2010.99	High	5.32	D
FALSE	High	YAGEPVPFIEPPESFEFYAQQLR	1x2PCA [N-Term]	1	1	3	P42704	0	2803.34	High	5.32	Y
FALSE	High	QLASGLLLVTGPLVLNR	1x2PCA [N-Term]	1	1	3	Q02878	0	1853.1	High	5.32	Q
FALSE	High	SNMDNMFESYINNLR	1x2PCA [N-Term]	1	1	15	P05787	0	1936.83	High	5.32	S
FALSE	High	SLADELALVDVLEDK	1x2PCA [N-Term]	1	1	11	P07195	0	1718.88	High	5.32	S
FALSE	High	VQVQDNEGCPVEALVK	1xCarbamidomethyl [C9]; 1x2PCA [N-Term]	1	1	2	P21333	0	1873.91	High	5.32	V
FALSE	High	KHEAFESDLAAHQDR	1x2PCA [N-Term]	2	3	2	P12814; O43707	1	1842.85	High	5.32	K
FALSE	High	APEQEQAAPGPAAGGEAPK		1	1	5	P80723	0	1775.86	High	5.31	A
FALSE	High	LEEMINELAVAMTAVK	1x2PCA [N-Term]	1	1	2	Q15363	0	1850.94	High	5.31	L
FALSE	High	SLQDIIAILGMDELSEEDK	1x2PCA [N-Term]	1	1	4	P06576	0	2208.07	High	5.31	S
FALSE	High	TDMDNQIVVSDYAQMDR	1x2PCA [N-Term]	1	1	1	P50991	0	2089.9	High	5.31	T
FALSE	High	LQQELDDLLVDLDHQR	1x2PCA [N-Term]	1	1	2	P35579	0	2039.02	High	5.3	L
FALSE	High	HWILPQDYDHAQAEAR	1x2PCA [N-Term]	1	1	2	Q15293	0	2038.95	High	5.3	H
FALSE	High	GAGIGGLGITVEGPSESK	1x2PCA [N-Term]	1	1	1	O75369	0	1717.88	High	5.3	G
FALSE	High	IGYNPDTVAFVPISGWNGDNMLEPSANMPWFK	1xOxidation [M]; 1x2PCA [N-Term]	1	2	12	P68104	0	3672.69	High	5.3	I
FALSE	High	FLVVLNFGDVGLSAGLQASDLPASASLPAK	1x2PCA [N-Term]	1	1	1	P08195	0	3046.62	High	5.3	F
FALSE	High	VTTMDAELEFAIQPNTTGK	1x2PCA [N-Term]	3	3	4	P35241; P26038; P15311	0	2155.04	High	5.3	V
FALSE	High	SLDLFNCEVTNLNDYR	1xCarbamidomethyl [C7]; 1x2PCA [N-Term]	2	2	14	P39687; Q92688	0	2061.93	High	5.3	S
FALSE	High	QTQTFTTYSDNQPGVLIQVYEGER	1x2PCA [N-Term]	1	1	6	P11142	0	2863.35	High	5.3	Q
FALSE	High	TGQATVASGIPAGWMGLDCGPESSKK	1xCarbamidomethyl [C19]; 1x2PCA [N-Term]	1	1	1	P00558	1	2694.27	High	5.3	T
FALSE	High	VTIAQGGVLPNIQAVLLPK	1x2PCA [N-Term]	1	10	36	Q16777	0	2020.2	High	5.29	V
FALSE	High	TAAFLLPILSQIYSDGPGEALR	1x2PCA [N-Term]	1	1	3	O00571	0	2421.28	High	5.29	T
FALSE	High	SLVEASSSGVSVLSLCEK	1xCarbamidomethyl [C16]; 1x2PCA [N-Term]	1	1	2	Q9UQ80	0	1940.96	High	5.29	S
FALSE	High	FAGYVTSIAATELEDDDDDYSSSTSLLGQK	1x2PCA [N-Term]	1	1	1	O75533	0	3287.48	High	5.29	F
FALSE	High	VYNVTQHAVGIVVNK	1x2PCA [N-Term]	1	1	5	P46778	0	1729.94	High	5.29	V
FALSE	High	SPDVGLYGVIPECGETYHSDLAEAK	1xCarbamidomethyl [C13]	1	1	1	P46940	0	2707.26	High	5.29	S
FALSE	High	AAVPSGASTGIYEALELR	1x2PCA [N-Term]	1	3	20	P06733	0	1893.97	High	5.28	A
FALSE	High	ASLEAAIADAEQR	1x2PCA [N-Term]	1	1	10	P05787	0	1433.7	High	5.28	A
FALSE	High	SLLVIPNTLAVNAAQDSTDLVAK	1x2PCA [N-Term]	1	1	2	P17987	0	2442.32	High	5.28	S
FALSE	High	FLVLDEADGLLSQGYSDFINR	1x2PCA [N-Term]	1	1	2	Q92499	0	2461.2	High	5.27	F
FALSE	High	TAMSTPHVAEPAENEQDEQDENGAEASADLR	1x2PCA [N-Term]	1	1	1	P26038	0	3401.45	High	5.27	T
FALSE	High	IVEFLQSFDEITAMTGDGVNDAPALK	1x2PCA [N-Term]	1	1	2	P16615	0	2870.39	High	5.27	I
FALSE	High	NADMSEEMQQDSVECATQALEK	1xCarbamidomethyl [C15]; 1x2PCA [N-Term]	1	1	1	P63167	0	2603.07	High	5.27	N
FALSE	High	IMRPTDVPDTGLLCDLLWSDPDK	1xCarbamidomethyl [C14]; 1x2PCA [N-Term]	1	1	2	P62140	0	2746.32	High	5.27	I
FALSE	High	VESVFETLVEDSAEEESTLTK	1x2PCA [N-Term]	1	1	3	Q9Y4L1	0	2431.14	High	5.27	V
FALSE	High	VWGNVVTVEWADPVEEPDPEVMAK	1x2PCA [N-Term]	1	1	4	O43390	0	2785.32	High	5.27	V
FALSE	High	VILGSEAAQQHPEEVR	1x2PCA [N-Term]	1	1	1	Q9NY33	0	1851.93	High	5.27	V
FALSE	High	VLECLASGIVMPDGSGIYDPCEK	2xCarbamidomethyl [C4; C21]; 1x2PCA [N-Term]	1	1	4	Q12906	0	2599.19	High	5.26	V
FALSE	High	HHAAYVNNLNVTEEK	1x2PCA [N-Term]	1	1	2	P04179	0	1827.88	High	5.26	H
FALSE	High	VGSAADIPINISETDLSLLTATVVPPSGR	1x2PCA [N-Term]	1	1	3	P21333	0	2982.58	High	5.26	V
FALSE	High	DAGIEPGPDTYLALLNAYAEK	1x2PCA [N-Term]	1	1	2	P42704	0	2310.13	High	5.25	D
FALSE	High	QTIDNSQGAYQEAFDISK	1x2PCA [N-Term]	1	1	3	P27348	0	2103.96	High	5.25	Q
FALSE	High	VQNTSLEAIVQNASSDNQGIQLSAVQAAR	1x2PCA [N-Term]	1	1	1	O00629	0	3101.56	High	5.25	V
FALSE	High	QLSQSLLPAIVELAEDAK	1x2PCA [N-Term]	2	2	7	P30154; P30153	0	2014.09	High	5.25	Q
FALSE	High	IQVTPPGFQLVFLPFADDK	1x2PCA [N-Term]	1	1	4	P12956	0	2221.17	High	5.25	I
FALSE	High	MATEVAADALGEEWK	1x2PCA [N-Term]	1	1	5	P62753	0	1709.78	High	5.24	M
FALSE	High	ARFEELNADLFR	1x2PCA [N-Term]	1	2	4	P11142	1	1569.78	High	5.24	A
FALSE	High	YHTSQSGDEMTSLSEYVSR	1xOxidation [M10]; 1x2PCA [N-Term]	1	1	1	P08238	0	2281.97	High	5.24	Y
FALSE	High	EAGAGGLAIAVEGPSK	1x2PCA [N-Term]	1	1	2	P21333	0	1515.78	High	5.24	E
FALSE	High	TIAECLADELINAAK	1xCarbamidomethyl [C5]; 1x2PCA [N-Term]	1	1	13	P46782	0	1720.86	High	5.23	T
FALSE	High	ATENDIYNFFSPLNPVR	1x2PCA [N-Term]	2	2	13	P31943; P52597	0	2086	High	5.23	A
FALSE	High	NQGGYGGSSSSSSYGSGR	1x2PCA [N-Term]	1	1	8	P09651	0	1783.73	High	5.23	N
FALSE	High	VIISAPSADAPMFVMGVNHEK	1x2PCA [N-Term]	1	1	28	P04406	0	2302.14	High	5.23	V
FALSE	High	DDQVTVIGAGVTLHEALAAAELLK	1x2PCA [N-Term]	1	1	1	P29401	0	2523.35	High	5.22	D
FALSE	High	LVLEQVVTSIASVADTAEEK	1x2PCA [N-Term]	1	1	1	O00410	0	2191.15	High	5.22	L
FALSE	High	VCTLAIIDPGDSDIIR	1xCarbamidomethyl [C2]; 1x2PCA [N-Term]	1	1	15	P62888	0	1846.94	High	5.22	V
FALSE	High	ANPDPNCCLGVFGLSLYTTER	2xCarbamidomethyl [C7; C8]; 1x2PCA [N-Term]	1	1	1	P62995	0	2473.13	High	5.22	A
FALSE	High	ARPAEVGGMQLR	1x2PCA [N-Term]	1	1	2	P33316	0	1373.71	High	5.22	A
FALSE	High	HLLSLMGIPYLDAPSEAEASCAALVK	1xCarbamidomethyl [C21]; 1x2PCA [N-Term]	1	1	6	P39748	0	2845.43	High	5.22	H
FALSE	High	VGQEIEVRPGIVSK	1x2PCA [N-Term]	1	1	2	P41091	0	1599.89	High	5.21	V
FALSE	High	EVMLDAALALAAEISSK	1x2PCA [N-Term]	1	1	1	Q13011	0	1820.95	High	5.21	E
FALSE	High	YSNEDTLSVALPYFWEHFDK	1x2PCA [N-Term]	1	1	3	P26641	0	2550.16	High	5.21	Y
FALSE	High	IVDILYATDEGFVIPDEGGPQEEQEEY	1x2PCA [N-Term]	1	1	2	Q15691	0	3144.42	High	5.21	I
FALSE	High	VSLDVNHFAPDELTVK	1x2PCA [N-Term]	1	1	1	P04792	0	1872.95	High	5.21	V
FALSE	High	AAFDDAIAELDTLSEESYK	1x2PCA [N-Term]	1	1	15	P62258	0	2176.99	High	5.21	A
FALSE	High	VWGNVGTVEWADPIEDPDPEVMAK	1x2PCA [N-Term]	1	1	2	O60506	0	2743.27	High	5.21	V
FALSE	High	VTAQGPGLEPSGNIANK	1x2PCA [N-Term]	1	1	4	P21333	0	1741.89	High	5.2	V
FALSE	High	LYGSAGPPPTGEEDTAEKDEL	1x2PCA [N-Term]	1	1	6	P11021	1	2265.02	High	5.2	L
FALSE	High	DHAATTAGAASLAGGHHR	1x2PCA [N-Term]	1	1	1	P29083	0	1789.85	High	5.2	D
FALSE	High	RFDEILEASDGIMVAR	1x2PCA [N-Term]	1	1	4	P14618	1	1910.94	High	5.2	R
FALSE	High	VELNALMTDETISNVPILILGNK	1x2PCA [N-Term]	1	1	1	Q9NR31	0	2586.38	High	5.19	V
FALSE	High	ADLLLSTQPGREEGSPLELER	1x2PCA [N-Term]	1	1	2	P08195	1	2399.22	High	5.19	A
FALSE	High	AVTEQGHELSNEER	1x2PCA [N-Term]	1	1	9	P31946	0	1687.77	High	5.19	A
FALSE	High	GHYTEGAELVDSVLDVVR	1x2PCA [N-Term]	3	5	3	Q13509; P07437; P68371	0	2048.01	High	5.19	G
FALSE	High	SYCAEIAHNVSSK	1xCarbamidomethyl [C3]; 1x2PCA [N-Term]	1	1	8	P62910	0	1554.7	High	5.18	S
FALSE	High	LIALSIDSVEDHLAWSK	1x2PCA [N-Term]	1	1	6	P30041	0	1986.03	High	5.18	L
FALSE	High	NAGNCLSPAVIVGLLK	1xCarbamidomethyl [C5]; 1x2PCA [N-Term]	1	1	4	O43175	0	1714.93	High	5.18	N
FALSE	High	FNDEHIPESPYLVPVIAPSDDAR	1x2PCA [N-Term]	1	1	1	O75369	0	2670.28	High	5.18	F
FALSE	High	GQVGGEINVEMDAAPGVDLSR	1x2PCA [N-Term]	1	1	1	Q04695	0	2203.04	High	5.18	G
FALSE	High	NREPVQLETLSIR	1x2PCA [N-Term]	1	1	4	P62314	1	1643.89	High	5.18	N
FALSE	High	VSQPIEGHAASFAQFK	1x2PCA [N-Term]	1	1	2	Q00610	0	1805.9	High	5.18	V
FALSE	High	VTNGAFTGEISPGMIK	1x2PCA [N-Term]	1	1	7	P60174	0	1710.85	High	5.18	V
FALSE	High	DLYANTVLSGGTTMYPGIADR	1xOxidation [M14]; 1x2PCA [N-Term]	1	2	11	P60709	0	2320.09	High	5.18	D
FALSE	High	TFITSDFMTGIPATPGNEIPVEVVLK	1x2PCA [N-Term]	1	1	4	P49915	0	2865.47	High	5.17	T
FALSE	High	VLNNMEIGTSLFDEEGAK	1xOxidation [M5]; 1x2PCA [N-Term]	1	1	2	P00558	0	2071.96	High	5.17	V
FALSE	High	HELQANCYEEVK	1xCarbamidomethyl [C7]; 1x2PCA [N-Term]	1	1	10	P23528	0	1608.71	High	5.17	H
FALSE	High	DAGYGGLSLSIEGPSK	1x2PCA [N-Term]	1	1	1	P21333	0	1639.8	High	5.17	D
FALSE	High	EHPYLFSQCQAIHCR	2xCarbamidomethyl [C9; C14]; 1x2PCA [N-Term]	1	1	1	P09960	0	2034.91	High	5.17	E
FALSE	High	ETDLLLDDSLVSIFGNR	1x2PCA [N-Term]	1	1	11	P30044	0	1996	High	5.16	E
FALSE	High	QATTIIADNIIFLSDQTK	1x2PCA [N-Term]	1	1	5	Q04837	0	2081.09	High	5.16	Q
FALSE	High	QPAIMPGQSYGLEDGSCSYK	1xCarbamidomethyl [C17]	1	1	4	P14866	0	2187.97	High	5.16	Q
FALSE	High	AAVEEGIVLGGGCALLR	1xCarbamidomethyl [C13]; 1x2PCA [N-Term]	1	1	15	P10809	0	1773.93	High	5.16	A
FALSE	High	TDAPQPDVKEEEEEKEEEK	1x2PCA [N-Term]	1	1	1	P27824	2	2348.04	High	5.16	T
FALSE	High	ERESLQQMAEVTR	1x2PCA [N-Term]	1	1	3	P14314	1	1665.8	High	5.16	E
FALSE	High	NLEALALDLMEPEQAVDLTLPK	1x2PCA [N-Term]	1	1	3	P12956	0	2512.3	High	5.16	N
FALSE	High	LGNNCVFAPADVTSEK	1xCarbamidomethyl [C5]; 1x2PCA [N-Term]	1	1	4	Q99714	0	1810.84	High	5.16	L
FALSE	High	IINEPTAAAIAYGLDR	1x2PCA [N-Term]	1	2	13	P0DMV9	0	1776.93	High	5.15	I
FALSE	High	IQEIIEQLDVTTSEYEK	1x2PCA [N-Term]	1	1	13	P10809	0	2127.05	High	5.15	I
FALSE	High	HHSLGGQYGVQGFPTIK	1x2PCA [N-Term]	1	1	1	Q15084	0	1914.96	High	5.15	H
FALSE	High	DGPLNMILDDGGDLTNLIHTK	1x2PCA [N-Term]	1	1	6	P23526	0	2341.15	High	5.15	D
FALSE	High	RPPGPTTSPASTSLSSPGQR		1	1	1	Q01970	0	1981.01	High	5.15	R
FALSE	High	VQASLAANTFTITGHAETK	1x2PCA [N-Term]	1	1	2	P20290	0	2049.04	High	5.15	V
FALSE	High	MALELLTQEFGIPIER	1x2PCA [N-Term]	1	1	2	P49588	0	1949.02	High	5.14	M
FALSE	High	APSVATVGSICDLNLK	1xCarbamidomethyl [C11]	1	1	2	O75369	0	1644.86	High	5.14	A
FALSE	High	LYVTYFGGDEAAGLEADLECK	1xCarbamidomethyl [C20]; 1x2PCA [N-Term]	1	1	2	P49588	0	2410.09	High	5.14	L
FALSE	High	HVVQSISTQQEK	1x2PCA [N-Term]	1	1	3	P24539	0	1472.75	High	5.13	H
FALSE	High	DMAIATGGAVFGEEGLTLNLEDVQPHDLGK	1x2PCA [N-Term]	1	1	6	P10809	0	3186.54	High	5.13	D
FALSE	High	TAAANAAAGAAENAFR	1x2PCA [N-Term]	1	1	1	O14828	0	1565.75	High	5.13	T
FALSE	High	QMEQISQFLQAAER	1x2PCA [N-Term]	1	1	4	P37802	0	1767.85	High	5.13	Q
FALSE	High	ILDDDTIITTLENLK	1x2PCA [N-Term]	1	1	2	Q14204	0	1805.95	High	5.13	I
FALSE	High	ASGNYATVISHNPETK	1x2PCA [N-Term]	1	1	5	P62917	0	1777.85	High	5.13	A
FALSE	High	ATPPQIVNGDQYCGDYELFVEAVEQNTLQEFLK	1xCarbamidomethyl [C13]; 1x2PCA [N-Term]	1	1	1	Q9H299	0	3904.84	High	5.12	A
FALSE	High	DKPHVNVGTIGHVDHGK	1x2PCA [N-Term]	1	1	1	P49411	0	1898.96	High	5.12	D
FALSE	High	SGDSEVYQLGDVSQK	1x2PCA [N-Term]	1	1	2	Q04837	0	1700.78	High	5.12	S
FALSE	High	LTHDVELNLDYER	1x2PCA [N-Term]	1	1	3	P02786	0	1705.82	High	5.11	L
FALSE	High	ISFPAIQAAPSFSNSFPQIFR	1x2PCA [N-Term]	1	1	1	P23381	0	2414.23	High	5.11	I
FALSE	High	IGCLLSGGLDSSLVAATLLK	1xCarbamidomethyl [C3]; 1x2PCA [N-Term]	1	1	2	P08243	0	2077.14	High	5.11	I
FALSE	High	FFPEDVSEELIQEITQR	1x2PCA [N-Term]	1	1	1	P35241	0	2169.05	High	5.11	F
FALSE	High	LAQANGWGVMVSHR	1x2PCA [N-Term]	1	1	8	P06733	0	1614.8	High	5.11	L
FALSE	High	VSYGIGDEEHDQEGR	1x2PCA [N-Term]	1	1	1	P27695	0	1779.76	High	5.11	V
FALSE	High	ELEAVCQDVLSLLDNYLIK	1xCarbamidomethyl [C6]; 1x2PCA [N-Term]	1	1	1	P61981	0	2324.18	High	5.11	E
FALSE	High	VHIPNDDAQFDASHCDSDK	1xCarbamidomethyl [C15]; 1x2PCA [N-Term]	1	1	2	Q16576	0	2259.94	High	5.11	V
FALSE	High	DAGEGGLSLAIEGPSK	1x2PCA [N-Term]	1	1	3	P21333	0	1589.78	High	5.1	D
FALSE	High	MMCGAPSATQPATAETQHIADQVR	1xAcetyl [N-Term]; 1xCarbamidomethyl [C3]	1	1	4	P04080	0	2613.19	High	5.1	M
FALSE	High	EALVDTLTGILSPVQEVR	1x2PCA [N-Term]	1	1	1	Q96P70	0	2029.1	High	5.1	E
FALSE	High	SIQEIQELDKDDESLRK	1x2PCA [N-Term]	1	1	1	P52565	2	2135.06	High	5.1	S
FALSE	High	KPAEQAEETAPIEATATK		1	1	2	Q8N4Q1	0	1884.95	High	5.1	K
FALSE	High	AMGIMNSFVNDIFER	1x2PCA [N-Term]	2	14	31	Q16778; Q99880	0	1832.85	High	5.1	A
FALSE	High	RFDEILEASDGIMVAR	1xOxidation [M13]; 1x2PCA [N-Term]	1	1	1	P14618	1	1926.94	High	5.09	R
FALSE	High	VIAINVDDPDAANYNDINDVK	1x2PCA [N-Term]	1	1	6	Q15181	0	2377.13	High	5.09	V
FALSE	High	SAALPIFSSFVSNWDEATK	1x2PCA [N-Term]	1	1	2	O76021	0	2159.04	High	5.09	S
FALSE	High	LAQQYYLVYQEPIPTAQLVQR	1x2PCA [N-Term]	1	1	2	P25787	0	2610.37	High	5.09	L
FALSE	High	MDALQLANSAFAVDLFK	1xAcetyl [N-Term]	1	1	5	P36952	0	1895.96	High	5.09	M
FALSE	High	MQQQLDEYQELLDIK	1x2PCA [N-Term]	1	1	9	P02545	0	1982.95	High	5.09	M
FALSE	High	GSYGDLGGPIITTQVTIPK	1x2PCA [N-Term]	1	1	1	P61978	0	2006.06	High	5.09	G
FALSE	High	TVLMNPNIASVQTNEVGLK	1x2PCA [N-Term]	1	1	2	P31327	0	2117.11	High	5.08	T
FALSE	High	AGSNMLLIGVHGPTTPCEEVSMK	1xCarbamidomethyl [C17]; 1x2PCA [N-Term]	1	1	1	O75369	0	2517.19	High	5.08	A
FALSE	High	LEAELGNMQGLVEDFK	1x2PCA [N-Term]	1	1	24	P05787	0	1881.91	High	5.08	L
FALSE	High	QGFGELLQAVPLADSFR	1x2PCA [N-Term]	1	1	10	P27695	0	1936.99	High	5.08	Q
FALSE	High	QPMNAASGAAMSLAGAEK		1	1	2	P08195	0	1704.8	High	5.08	Q
FALSE	High	VNNVVWDLDRPLEEDCTLELLK	1xCarbamidomethyl [C16]; 1x2PCA [N-Term]	1	1	6	P26639	0	2759.37	High	5.08	V
FALSE	High	IAQDLEMYGVNYFSIK	1x2PCA [N-Term]	1	1	6	P26038	0	1979.96	High	5.08	I
FALSE	High	FYPEDVAEELIQDITQK	1x2PCA [N-Term]	1	1	2	P15311	0	2127.03	High	5.07	F
FALSE	High	AQIHDLVLVGGSTR	1x2PCA [N-Term]	1	1	7	P0DMV9	0	1554.84	High	5.07	A
FALSE	High	DWILPSDYDHAEAEAR	1x2PCA [N-Term]	1	1	1	O43852	0	1976.88	High	5.07	D
FALSE	High	TLAQLNPESSLFIIASK	1x2PCA [N-Term]	1	1	6	P06744	0	1921.04	High	5.07	T
FALSE	High	VDVSAPDVEAHGPEWNLK	1x2PCA [N-Term]	1	1	1	Q09666	0	2051.98	High	5.07	V
FALSE	High	DASIVGFFDDSFSEAHSEFLK	1x2PCA [N-Term]	1	1	6	P30101	0	2437.1	High	5.07	D
FALSE	High	AQTEGINISEEALNHLGEIGTK	1x2PCA [N-Term]	1	1	1	Q9Y265	0	2413.2	High	5.06	A
FALSE	High	TQEQLALEMAELTAR	1x2PCA [N-Term]	1	1	6	P26038	0	1792.89	High	5.06	T
FALSE	High	CPNLTHLNLSGNK	1xCarbamidomethyl [C1]	1	1	5	P39687	0	1467.74	High	5.06	C
FALSE	High	TVAGGAWTYNTTSAVTVK	1x2PCA [N-Term]	1	1	1	P61513	0	1915.95	High	5.06	T
FALSE	High	FGLNTVLTTDNSDLFINSIGIVPSVR	1x2PCA [N-Term]	1	1	1	Q9UHG3	0	2881.51	High	5.06	F
FALSE	High	MIQTPDADLDVTNIIQADEPTTLTTNALDLNSVLGK	1x2PCA [N-Term]	1	1	1	Q13155	0	3929.97	High	5.06	M
FALSE	High	HSSLAGCQIINYR	1xCarbamidomethyl [C7]; 1x2PCA [N-Term]	1	1	3	Q00610	0	1607.77	High	5.06	H
FALSE	High	IFQNLDGALDEVVLK	1x2PCA [N-Term]	1	1	2	Q02809	0	1762.94	High	5.06	I
FALSE	High	HNEETGDNVGPLIIK	1x2PCA [N-Term]	1	1	1	Q9NZ45	0	1724.86	High	5.06	H
FALSE	High	SDLFQDDLYPDTAGPEAALEAEEWFEGK	1x2PCA [N-Term]	1	1	2	Q9ULV4	0	3232.43	High	5.06	S
FALSE	High	VINEPTAAALAYGLDK	1x2PCA [N-Term]	1	1	6	P38646	0	1734.91	High	5.05	V
FALSE	High	EHALLAYTLGVK	1x2PCA [N-Term]	1	3	7	P68104	0	1403.77	High	5.05	E
FALSE	High	IVHAFDMEDLGDK	1x2PCA [N-Term]	1	1	2	Q9NZ45	0	1578.73	High	5.05	I
FALSE	High	LLQTDDEEEAGLLELLK	1x2PCA [N-Term]	1	1	5	P55060	0	2018.03	High	5.05	L
FALSE	High	SSGPTSLFAVTVAPPGAR	1x2PCA [N-Term]	1	1	9	Q00839	0	1803.94	High	5.05	S
FALSE	High	VIISAPSADAPMFVMGVNHEK	1xOxidation [M]; 1x2PCA [N-Term]	1	1	36	P04406	0	2318.13	High	5.05	V
FALSE	High	TSIDAYDNFDNISLAQR	1x2PCA [N-Term]	1	1	1	Q00610	0	2031.94	High	5.05	T
FALSE	High	SAAQAAAQTNSNAAGK	1x2PCA [N-Term]	1	1	5	Q8NC51	0	1549.74	High	5.04	S
FALSE	High	VAIIEELVVGYETSLK	1x2PCA [N-Term]	1	1	1	Q9BXJ9	0	1852.01	High	5.04	V
FALSE	High	NAPAIIFIDELDAIAPK	1x2PCA [N-Term]	1	1	2	P55072	0	1900.02	High	5.04	N
FALSE	High	GSTAPVGGGAFPTIVER	1x2PCA [N-Term]	1	1	1	Q15084	0	1704.87	High	5.04	G
FALSE	High	TDASSASSFLDSDELER	1x2PCA [N-Term]	1	1	1	Q14498	0	1918.83	High	5.04	T
FALSE	High	ITSCIFQLLQEAGIK	1xCarbamidomethyl [C4]; 1x2PCA [N-Term]	1	1	2	P22234	0	1809.96	High	5.04	I
FALSE	High	GNDISSGTVLSDYVGSGPPK	1x2PCA [N-Term]	1	1	1	P30086	0	2038.97	High	5.04	G
FALSE	High	ILDSVGIEADDDRLNK	1x2PCA [N-Term]	1	1	10	P05387	1	1861.93	High	5.04	I
FALSE	High	LAMQEFMILPVGAANFR	1x2PCA [N-Term]	1	1	5	P06733	0	1997.01	High	5.04	L
FALSE	High	ANLQIDQINTDLNLER	1x2PCA [N-Term]	1	1	1	P35579	0	1958.99	High	5.04	A
FALSE	High	LGEIVTTIPTIGFNVETVEYK	1x2PCA [N-Term]	2	4	9	P61204; P18085	0	2412.27	High	5.04	L
FALSE	High	HVGDLGNVTADK	1x2PCA [N-Term]	1	1	4	P00441	0	1314.64	High	5.04	H
FALSE	High	LEEDINSSMTNSTAASRPPVTLR	1x2PCA [N-Term]	1	1	2	Q15365	0	2578.26	High	5.03	L
FALSE	High	SAGVQCFGPTAEAAQLESSK	1xCarbamidomethyl [C6]; 1x2PCA [N-Term]	1	1	1	P22102	0	2126.98	High	5.03	S
FALSE	High	LAAVALINAAIQK	1x2PCA [N-Term]	1	1	1	P46940	0	1384.83	High	5.03	L
FALSE	High	YINENLIVNTDELGR	1x2PCA [N-Term]	1	1	1	P17987	0	1851.92	High	5.03	Y
FALSE	High	HLTHAQSTLDAK	1x2PCA [N-Term]	1	1	5	Q15125	0	1410.71	High	5.03	H
FALSE	High	SELVANNVTLPAGEQR	1x2PCA [N-Term]	1	2	2	P42167	0	1786.91	High	5.03	S
FALSE	High	LDGLVETPTGYIESLPR	1x2PCA [N-Term]	1	1	5	P55209	0	1949	High	5.03	L
FALSE	High	TEFLSFMNTELAAFTK	1x2PCA [N-Term]	1	1	5	P31949	0	1938.93	High	5.03	T
FALSE	High	HQAQIDHYLGLANK	1x2PCA [N-Term]	1	1	1	Q9NQC3	0	1696.86	High	5.02	H
FALSE	High	ARPFPDGLAEDIDK	1x2PCA [N-Term]	1	1	10	P13639	0	1632.8	High	5.02	A
FALSE	High	TMLEDLGMDDEGDDDPVPLPNVNAAILK	1x2PCA [N-Term]	1	1	1	P63208	0	3086.43	High	5.02	T
FALSE	High	LGDVYVNDAFGTAHR	1x2PCA [N-Term]	1	2	12	P00558	0	1723.82	High	5.02	L
FALSE	High	AMFESQSEDELTPFDMSIQCIQSVYISK	1xCarbamidomethyl [C20]; 1x2PCA [N-Term]	1	1	1	P12956	0	3372.51	High	5.02	A
FALSE	High	IQDVGLVPMGGVMSGAVPAAAAQEAVEEDIPIAK	1x2PCA [N-Term]	1	1	4	P52815	0	3422.73	High	5.01	I
FALSE	High	SPFVVQVGEACNPNACR	2xCarbamidomethyl [C11; C16]	1	1	3	O75369	0	1904.87	High	5.01	S
FALSE	High	IHEGCEEPATHNALAK	1xCarbamidomethyl [C5]; 1x2PCA [N-Term]	1	1	6	Q00610	0	1865.86	High	5.01	I
FALSE	High	MTDQEAIQDLWQWR	1x2PCA [N-Term]	1	1	16	P06748	0	1908.87	High	5.01	M
FALSE	High	VHVGDEDFVHLR	1x2PCA [N-Term]	1	1	3	P04080	0	1511.74	High	5.01	V
FALSE	High	VNNSSLIGVGYTQTLRPGVK	1x2PCA [N-Term]	1	1	1	P45880	0	2192.18	High	5.01	V
FALSE	High	VPPAINQFTQALDR		1	1	6	P62424	0	1569.84	High	5.01	V
FALSE	High	IPEINSSDMSAHVTSPSGR		1	1	3	O75369	0	1984.94	High	5.01	I
FALSE	High	ITGEAFVQFASQELAEK	1x2PCA [N-Term]	1	1	5	P52597	0	1956.97	High	5.01	I
FALSE	High	SDGAPASDSKPGSSEAAPSSK	1x2PCA [N-Term]	1	1	7	P80723	0	2021.9	High	5	S
FALSE	High	VFQSSANYAENFIQSIISTVEPAQR	1x2PCA [N-Term]	1	1	1	P36871	0	2888.42	High	5	V
FALSE	High	LIPEMDQIFTEVEMTTLEK	1x2PCA [N-Term]	1	1	2	Q9Y4L1	0	2356.15	High	5	L
FALSE	High	VVSEDFLQDVSASTK	1x2PCA [N-Term]	1	1	2	P09874	0	1713.83	High	5	V
FALSE	High	YGIICMEDLIHEIYTVGK	1xCarbamidomethyl [C5]; 1x2PCA [N-Term]	1	1	2	P18124	0	2243.09	High	5	Y
FALSE	High	EIFLSQPILLELEAPLK	1x2PCA [N-Term]	2	3	3	P62136; P62140	0	2042.16	High	5	E
FALSE	High	SEDFGVNEDLADSDAR	1x2PCA [N-Term]	1	1	5	P04083	0	1828.76	High	5	S
FALSE	High	HYAHTDCPGHADYVK	1xCarbamidomethyl [C7]; 1x2PCA [N-Term]	1	1	2	P49411	0	1859.79	High	4.99	H
FALSE	High	HLEINPDHSIIETLR	1x2PCA [N-Term]	1	1	2	P07900	0	1875.97	High	4.99	H
FALSE	High	MLVDDIGDVTITNDGATILK	1x2PCA [N-Term]	1	1	1	P17987	0	2193.11	High	4.99	M
FALSE	High	FEEHVQSVDIAAFNK	1x2PCA [N-Term]	1	1	1	P29692	0	1822.88	High	4.99	F
FALSE	High	STAGDTHLGGEDFDNR	1x2PCA [N-Term]	1	2	5	P11142	0	1780.75	High	4.99	S
FALSE	High	YTIVVSATASDAAPLQYLAPYSGCSMGEYFR	1xCarbamidomethyl [C24]; 1x2PCA [N-Term]	1	1	2	P25705	0	3477.61	High	4.98	Y
FALSE	High	EGTIGDMAILGITESFQVK	1x2PCA [N-Term]	1	1	1	P78371	0	2098.05	High	4.98	E
FALSE	High	MELSDANLQTLTEYLK	1xAcetyl [N-Term]	1	1	3	P55060	0	1910.94	High	4.98	M
FALSE	High	LLYDLADQLHAAVGASR	1x2PCA [N-Term]	1	1	2	P13804	0	1901.99	High	4.98	L
FALSE	High	VAHSDKPGSTSTASFR	1x2PCA [N-Term]	1	1	3	Q9P0L0	0	1736.84	High	4.98	V
FALSE	High	LFIGGLSFETTEESLR	1x2PCA [N-Term]	1	1	12	P22626	0	1887.95	High	4.98	L
FALSE	High	LLETTDRPDGHQNNLR	1x2PCA [N-Term]	1	1	3	Q14974	0	1967.97	High	4.98	L
FALSE	High	VNDTIQIDLETGK	1x2PCA [N-Term]	1	1	5	P62701	0	1534.77	High	4.98	V
FALSE	High	YNEDLELEDAIHTAILTLK	1x2PCA [N-Term]	1	1	2	P25787	0	2290.16	High	4.98	Y
FALSE	High	VDLGGFAGLFDLK	1x2PCA [N-Term]	1	1	1	P22102	0	1440.75	High	4.98	V
FALSE	High	TILSNQTVDIPENVDITLK	1x2PCA [N-Term]	1	1	5	P32969	0	2202.17	High	4.98	T
FALSE	High	NQDLAPNSAEQASILSLVTK	1x2PCA [N-Term]	1	1	2	Q12905	0	2188.12	High	4.97	N
FALSE	High	AAVPSGASTGIYEALELR		1	3	2	P06733	0	1804.94	High	4.97	A
FALSE	High	QLLCGAAIGTHEDDK	1xCarbamidomethyl [C4]; 1x2PCA [N-Term]	1	1	2	P12268	0	1716.8	High	4.97	Q
FALSE	High	LSVLDLVVALAPCADEAAISK	1xCarbamidomethyl [C13]; 1x2PCA [N-Term]	1	1	1	Q5JTH9	0	2244.19	High	4.97	L
FALSE	High	TFVNITPAEVGVLVGK	1x2PCA [N-Term]	1	1	21	P07737	0	1732.96	High	4.97	T
FALSE	High	FNALFAQGNYSEAAK	1x2PCA [N-Term]	1	1	3	Q00610	0	1719.81	High	4.97	F
FALSE	High	ISSLLEEQFQQGK	1x2PCA [N-Term]	1	1	8	P62241	0	1595.81	High	4.97	I
FALSE	High	DAGYEFDICFTSVQK	1xCarbamidomethyl [C9]; 1x2PCA [N-Term]	1	1	1	P18669	0	1868.82	High	4.97	D
FALSE	High	NIDDGTSDRPYSHALVAGIDR	1x2PCA [N-Term]	1	1	3	P61353	0	2361.12	High	4.97	N
FALSE	High	AVTEQGAELSNEER	1x2PCA [N-Term]	1	1	5	P27348	0	1621.75	High	4.97	A
FALSE	High	LTESVDVLMPNVGEIVGGSMR	1x2PCA [N-Term]	1	1	3	O43776	0	2292.14	High	4.97	L
FALSE	High	NVDLLSDMVQEHDEPILK	1x2PCA [N-Term]	1	1	1	P55209	0	2184.06	High	4.97	N
FALSE	High	VRQEESEQIK	1x2PCA [N-Term]	1	1	7	P08729	1	1334.67	High	4.96	V
FALSE	High	MVSAVLNGMLDQSFR	1x2PCA [N-Term]	1	1	1	P78527	0	1756.85	High	4.95	M
FALSE	High	LGQAELVVIDEAAAIPLPLVK	1x2PCA [N-Term]	1	1	1	Q9H0A0	0	2248.3	High	4.95	L
FALSE	High	IISNASCTTNCLAPLAK	2xCarbamidomethyl [C7; C11]; 1x2PCA [N-Term]	1	1	13	P04406	0	1922.95	High	4.95	I
FALSE	High	CELLYEGPPDDEAAMGIK	1xCarbamidomethyl [C1]; 1x2PCA [N-Term]	1	1	4	P13639	0	2096.93	High	4.95	C
FALSE	High	LMELHGEGSSSGK	1x2PCA [N-Term]	1	1	8	P61247	0	1420.65	High	4.95	L
FALSE	High	LVLDAFALPLTNLFK	1x2PCA [N-Term]	1	1	1	P55060	0	1764.01	High	4.95	L
FALSE	High	QAAPCVLFFDELDSIAK	1xCarbamidomethyl [C5]; 1x2PCA [N-Term]	1	1	5	P55072	0	2012.98	High	4.95	Q
FALSE	High	MVNPTVFFDIAVDGEPLGR	1x2PCA [N-Term]	1	1	1	P62937	0	2166.07	High	4.95	M
FALSE	High	FGANAILGVSLAVCK	1xCarbamidomethyl [C14]; 1x2PCA [N-Term]	1	3	13	P06733	0	1608.86	High	4.95	F
FALSE	High	IEAELQDICNDVLELLDK	1xCarbamidomethyl [C9]; 1x2PCA [N-Term]	1	1	4	P31946	0	2219.09	High	4.94	I
FALSE	High	AQHEDQVEQYK	1x2PCA [N-Term]	1	1	6	P02545	0	1463.65	High	4.94	A
FALSE	High	VLNNMEIGTSLFDEEGAK		1	1	1	P00558	0	1966.94	High	4.94	V
FALSE	High	TGAIVDVPVGEELLGR	1x2PCA [N-Term]	1	1	5	P25705	0	1713.92	High	4.94	T
FALSE	High	FEHCNFNDVTTR	1xCarbamidomethyl [C4]; 1x2PCA [N-Term]	1	1	7	P13987	0	1628.69	High	4.94	F
FALSE	High	VSGAQEMVSSAK	1x2PCA [N-Term]	1	1	2	O60664	0	1282.61	High	4.94	V
FALSE	High	APSVANVGSHCDLSLK	1xCarbamidomethyl [C11]	1	1	3	P21333	0	1654.82	High	4.94	A
FALSE	High	DPAEGDGAQPEETPR		1	1	2	Q14697	0	1568.68	High	4.94	D
FALSE	High	APKPDGPGGGPGGSHMGGNYGDDR		1	1	3	P35637	0	2252.97	High	4.93	A
FALSE	High	MNPAAEAEFNILLATDSYK	1xAcetyl [N-Term]	1	1	1	P43490	0	2140.03	High	4.93	M
FALSE	High	TFTDCFNCLPIAAIVDEK	2xCarbamidomethyl [C5; C8]; 1x2PCA [N-Term]	2	3	5	P62136; P62140	0	2203.02	High	4.93	T
FALSE	High	TIGTGLVTNTLAMTEEEK	1x2PCA [N-Term]	1	1	2	P49411	0	1996.99	High	4.93	T
FALSE	High	TVEAEAAHGTVTR	1x2PCA [N-Term]	1	1	3	O75874	0	1430.7	High	4.93	T
FALSE	High	APPQTHLPSGASSGTGSASATHGGGSPPGTR		1	1	1	P46379	0	2785.32	High	4.92	A
FALSE	High	YHTVNGHNCEVR	1xCarbamidomethyl [C9]; 1x2PCA [N-Term]	1	1	6	P09651	0	1574.69	High	4.92	Y
FALSE	High	VAGSVTELIQAAEAMK	1x2PCA [N-Term]	1	1	2	Q9Y490	0	1706.88	High	4.92	V
FALSE	High	EFADSLGIPFLETSAK	1x2PCA [N-Term]	2	3	6	P62820; Q9H0U4	0	1813.9	High	4.92	E
FALSE	High	LDVGNFSWGSECCTR	2xCarbamidomethyl [C12; C13]; 1x2PCA [N-Term]	1	1	1	P62241	0	1876.77	High	4.92	L
FALSE	High	EEASDYLELDTIK	1x2PCA [N-Term]	1	1	4	P14625	0	1614.75	High	4.92	E
FALSE	High	VLGTSVESIMATEDR	1x2PCA [N-Term]	1	1	2	P31327	0	1696.82	High	4.92	V
FALSE	High	VMLGETNPADSKPGTIR	1xOxidation [M2]; 1x2PCA [N-Term]	2	3	1	P15531; P22392	0	1890.94	High	4.92	V
FALSE	High	IDNDGDGFVTTEELK	1x2PCA [N-Term]	1	1	3	Q15293	0	1741.79	High	4.91	I
FALSE	High	IPDPEAVKPDDWDEDAPAK		1	1	5	P27824	0	2107.98	High	4.91	I
FALSE	High	AAVATFLQSVQVPEFTPK	1x2PCA [N-Term]	1	1	9	P22314	0	2022.07	High	4.91	A
FALSE	High	LVINGNPITIFQER	1x2PCA [N-Term]	1	1	26	P04406	0	1702.93	High	4.91	L
FALSE	High	YYGGAEVVDEIELLCQR	1xCarbamidomethyl [C15]; 1x2PCA [N-Term]	1	1	2	P34897	0	2102.99	High	4.91	Y
FALSE	High	GALQNIIPASTGAAK	1x2PCA [N-Term]	1	1	12	P04406	0	1500.82	High	4.91	G
FALSE	High	VYQSLCPTSWVTDWDEQR	1xCarbamidomethyl [C6]; 1x2PCA [N-Term]	1	1	2	P14854	0	2359.04	High	4.9	V
FALSE	High	VIISAPSADAPMFVMGVNHEK		1	1	3	P04406	0	2213.11	High	4.9	V
FALSE	High	EAHQLFLEPEVLDPESVELK	1x2PCA [N-Term]	1	1	1	P39748	0	2411.21	High	4.9	E
FALSE	High	LYIGLAGLATDVQTVAQR	1x2PCA [N-Term]	1	1	5	P49720	0	1978.08	High	4.9	L
FALSE	High	LAAVDATVNQVLASR	1x2PCA [N-Term]	1	1	6	Q15084	0	1616.88	High	4.9	L
FALSE	High	DPEAPIFQVADYGIVADLFK		1	1	3	P13804	0	2208.12	High	4.89	D
FALSE	High	NSRPEANEALER	1x2PCA [N-Term]	1	1	3	Q9Y696	0	1474.7	High	4.89	N
FALSE	High	QLVLQTGALVLSDNGICCIDEFDK	2xCarbamidomethyl [C17; C18]; 1x2PCA [N-Term]	1	1	1	P33991	0	2797.35	High	4.89	Q
FALSE	High	QLQQAQAAGAEQEVEK	1x2PCA [N-Term]	1	1	2	P39748	0	1816.88	High	4.89	Q
FALSE	High	MSATFIGNSTAIQELFK	1x2PCA [N-Term]	1	3	13	P68371	0	1946.97	High	4.89	M
FALSE	High	ATPLSSTVTLSMSADVPLVVEYK	1x2PCA [N-Term]	1	1	2	P12004	0	2497.29	High	4.89	A
FALSE	High	STAISLFYELSENDLNFIK	1x2PCA [N-Term]	1	1	5	P13639	0	2293.14	High	4.89	S
FALSE	High	TITVALADGGRPDNTGR	1x2PCA [N-Term]	1	1	3	P49588	0	1802.91	High	4.89	T
FALSE	High	TQLASWSDPTEETGPVAGILDTETLEK	1x2PCA [N-Term]	1	1	2	Q15149	0	2977.43	High	4.88	T
FALSE	High	KPVVDCVVSVPCFYTDAER	2xCarbamidomethyl [C6; C12]	1	1	1	P34932	0	2241.07	High	4.88	K
FALSE	High	FEVNISELPDEIDISSYIEQTR	1x2PCA [N-Term]	1	1	2	Q13838	0	2686.29	High	4.88	F
FALSE	High	APVQPQQSPAAAPGGTDEKPSGK		1	1	1	Q13200	0	2218.11	High	4.88	A
FALSE	High	KHPDSSVNFAEFSK	1x2PCA [N-Term]	1	1	2	P26583	1	1681.8	High	4.88	K
FALSE	High	KPRPPPALGPEETSASAGLPK		1	1	2	Q01105	0	2100.14	High	4.88	K
FALSE	High	VGINYQPPTVVPGGDLAK	1x2PCA [N-Term]	2	7	18	Q71U36; P68366	0	1914.01	High	4.88	V
FALSE	High	KPEDVLDDDDAGSAPLK		1	1	1	P35613	0	1784.85	High	4.87	K
FALSE	High	FPSLLTHNENMVAK		1	1	9	P62906	0	1600.82	High	4.87	F
FALSE	High	HAASTVQILGAEK	1x2PCA [N-Term]	1	1	2	Q9Y2X3	0	1413.75	High	4.87	H
FALSE	High	VDTMIVQAISLLDDLDK	1x2PCA [N-Term]	1	1	2	Q9Y2X3	0	1978.02	High	4.87	V
FALSE	High	SQVFSTAADGQTQVEIK	1x2PCA [N-Term]	1	1	3	P38646	0	1897.93	High	4.87	S
FALSE	High	IDDPTDSKPEDWDKPEHIPDPDAK	1x2PCA [N-Term]	1	1	6	P27797	0	2849.29	High	4.86	I
FALSE	High	AMGIMNSFVNDIFER	1xOxidation [M]; 1x2PCA [N-Term]	2	14	41	Q16778; Q99880	0	1848.84	High	4.86	A
FALSE	High	TSSAETPTIPLGSAVEAIK	1x2PCA [N-Term]	1	1	1	Q16891	0	1961.02	High	4.86	T
FALSE	High	AGNLGGGVVTIER	1x2PCA [N-Term]	1	1	5	P35268	0	1331.71	High	4.86	A
FALSE	High	ALVDELEWEIAQVDPK	1x2PCA [N-Term]	1	1	3	Q9Y2B0	0	1943.97	High	4.86	A
FALSE	High	MMGHRPVLVLSQNTK	1xAcetyl [N-Term]	1	1	1	P49368	0	1752.92	High	4.86	M
FALSE	High	GVVPLAGTNGETTTQGLDGLSER	1x2PCA [N-Term]	1	1	1	P04075	0	2361.17	High	4.86	G
FALSE	High	DNNPVVVLENELMYGVPFEFPPEAQSK	1x2PCA [N-Term]	1	1	1	P11177	0	3151.51	High	4.86	D
FALSE	High	ILLANFLAQTEALMR	1x2PCA [N-Term]	1	1	2	P06744	0	1792.98	High	4.86	I
FALSE	High	LIVDEAINEDNSVVSLSQPK	1x2PCA [N-Term]	1	1	3	P55072	0	2259.15	High	4.86	L
FALSE	High	IFHTVTTTDDPVIR	1x2PCA [N-Term]	1	1	1	O15371	0	1703.88	High	4.86	I
FALSE	High	AAAAAAAAAPAAAATAPTTAATTAATAAQ	1x2PCA [N-Term]	1	1	2	P37108	0	2457.24	High	4.85	A
FALSE	High	SGSMDPSGAHPSVR	1xOxidation [M4]; 1x2PCA [N-Term]	1	1	2	Q07666	0	1489.65	High	4.85	S
FALSE	High	YLEVVLNTLQQASQAQVDK	1x2PCA [N-Term]	1	1	2	Q14974	0	2236.16	High	4.85	Y
FALSE	High	RPQYSNPPVQGEVMEGADNQGAGEQGRPVR	1xOxidation [M14]	1	1	1	P67809	0	3239.52	High	4.85	R
FALSE	High	YDLFVGSQATDFGEALVR	1x2PCA [N-Term]	1	1	5	O43852	0	2077	High	4.85	Y
FALSE	High	IEIESFYEGEDFSETLTR	1x2PCA [N-Term]	1	1	12	P11021	0	2254.02	High	4.85	I
FALSE	High	AVFVDLEPTVIDEVR	1x2PCA [N-Term]	1	3	29	Q71U36	0	1790.93	High	4.85	A
FALSE	High	HQALQAEIAGHEPR	1x2PCA [N-Term]	1	1	1	Q13813	0	1645.82	High	4.85	H
FALSE	High	IRYESLTDPSK	1x2PCA [N-Term]	2	5	8	P07900; P08238	1	1397.71	High	4.85	I
FALSE	High	EGTGSTATSSSSTAGAAGK	1x2PCA [N-Term]	1	1	1	O15372	0	1716.77	High	4.85	E
FALSE	High	NMQNVEHVPLSLDR	1x2PCA [N-Term]	1	1	2	P20618	0	1740.85	High	4.84	N
FALSE	High	AGPGTLSVTIEGPSK	1x2PCA [N-Term]	1	1	4	O75369	0	1502.78	High	4.84	A
FALSE	High	AAGVNVEPFWPGLFAK	1x2PCA [N-Term]	1	1	16	P05386	0	1791.92	High	4.84	A
FALSE	High	VDNDENEHQLSLR	1x2PCA [N-Term]	1	1	11	P06748	0	1657.76	High	4.84	V
FALSE	High	LLYPADTPVGNDQLLEILNK	1x2PCA [N-Term]	1	1	6	Q15063	0	2315.23	High	4.84	L
FALSE	High	THEAEIVEGENHTYCIR	1xCarbamidomethyl [C15]; 1x2PCA [N-Term]	1	1	2	P21333	0	2146.96	High	4.84	T
FALSE	High	VANPSGNLTETYVQDR	1x2PCA [N-Term]	1	1	4	P21333	0	1852.88	High	4.84	V
FALSE	High	EILVGDVGQTVDDPYATFVK	1x2PCA [N-Term]	1	1	21	P23528	0	2255.12	High	4.83	E
FALSE	High	ASLDRPFTNLESAFYSIVGLSSLGAQVPDAK	1x2PCA [N-Term]	1	1	1	P04844	0	3342.7	High	4.83	A
FALSE	High	KPPLLNNADSVQAK		1	1	4	P09874	0	1494.83	High	4.83	K
FALSE	High	VFEVSLADLQNDEVAFR	1x2PCA [N-Term]	1	1	13	P61247	0	2041	High	4.83	V
FALSE	High	TREEECHFYAGGQVYPGEASR	1xCarbamidomethyl [C6]; 1x2PCA [N-Term]	1	1	1	Q13162	1	2532.1	High	4.83	T
FALSE	High	FGQGGAGPVGGQGPR	1x2PCA [N-Term]	1	1	2	P23246	0	1430.69	High	4.83	F
FALSE	High	EFNEDGALAVLQQFK	1x2PCA [N-Term]	1	1	2	O60506	0	1797.88	High	4.82	E
FALSE	High	SNFLNCYVSGFHPSDIEVDLLK	1xCarbamidomethyl [C6]; 1x2PCA [N-Term]	1	1	3	P61769	0	2643.25	High	4.82	S
FALSE	High	LVPLLDTGDIIIDGGNSEYR	1x2PCA [N-Term]	1	1	5	P52209	0	2249.14	High	4.82	L
FALSE	High	QAWFIENEEQEYVQTVK	1x2PCA [N-Term]	1	1	5	P04083	0	2230.05	High	4.82	Q
FALSE	High	VIACDGGGGALGHPK	1xCarbamidomethyl [C4]; 1x2PCA [N-Term]	1	1	1	O75380	0	1497.73	High	4.82	V
FALSE	High	DAYSGGAVNLYHVR	1x2PCA [N-Term]	1	1	2	P28074	0	1610.77	High	4.81	D
FALSE	High	SPYTVTVGQACNPSACR	2xCarbamidomethyl [C11; C16]	1	1	3	P21333	0	1867.84	High	4.81	S
FALSE	High	IMLFTNEDNPHGNDSAK	1x2PCA [N-Term]	1	1	1	P12956	0	1991.89	High	4.81	I
FALSE	High	HTGPNSPDTANDGFVR	1x2PCA [N-Term]	2	2	6	P31943; P55795	0	1773.79	High	4.81	H
FALSE	High	DQIAQLEASLAAAK	1x2PCA [N-Term]	1	1	3	P20700	0	1517.8	High	4.81	D
FALSE	High	NAVTQFVSSMSASADVLALAK	1x2PCA [N-Term]	1	2	1	P47985	0	2199.11	High	4.81	N
FALSE	High	IMEGPAFNFLDAPAVR	1x2PCA [N-Term]	1	1	5	P11177	0	1836.91	High	4.81	I
FALSE	High	EKPSYDTETDPSEGLMNVLK	1x2PCA [N-Term]	1	1	1	Q9HB71	0	2342.09	High	4.81	E
FALSE	High	TVVVNCNPETVSTDFDECDK	2xCarbamidomethyl [C6; C18]; 1x2PCA [N-Term]	1	1	2	P31327	0	2418.02	High	4.81	T
FALSE	High	SVTEQGAELSNEER	1x2PCA [N-Term]	1	1	7	P63104	0	1637.74	High	4.81	S
FALSE	High	LDLMDAGTDAMDVLMGR	1x2PCA [N-Term]	1	1	1	O00429	0	1912.86	High	4.8	L
FALSE	High	VLTGVAGEDAECHAAK	1xCarbamidomethyl [C12]; 1x2PCA [N-Term]	1	1	3	O95373	0	1716.8	High	4.8	V
FALSE	High	ALNVEPDGTGLTCSLAPNIISQL	1xCarbamidomethyl [C13]; 1x2PCA [N-Term]	1	1	10	P30044	0	2472.24	High	4.8	A
FALSE	High	DLVSSLTSGLLTIGDR	1x2PCA [N-Term]	1	1	2	P53396	0	1735.92	High	4.8	D
FALSE	High	ATIAGGGVIPHIHK	1x2PCA [N-Term]	1	2	4	Q71UI9	0	1459.82	High	4.8	A
FALSE	High	VNQIGSVTESIQACK	1xCarbamidomethyl [C14]; 1x2PCA [N-Term]	1	2	24	P06733	0	1722.85	High	4.8	V
FALSE	High	ASGQAFELILSPR	1x2PCA [N-Term]	1	1	1	P16949	0	1477.78	High	4.8	A
FALSE	High	YGINTTDIFQTVDLWEGK	1x2PCA [N-Term]	1	1	12	P37802	0	2189.05	High	4.8	Y
FALSE	High	VADGMVFGALLPCEECSGQLVFK	2xCarbamidomethyl [C13; C16]; 1x2PCA [N-Term]	1	1	3	P09874	0	2616.23	High	4.79	V
FALSE	High	NPDDITNEEYGEFYK		1	1	3	P07900	0	1833.78	High	4.79	N
FALSE	High	EFSITDVVPYPISLR	1x2PCA [N-Term]	1	1	2	P34932	0	1824.95	High	4.79	E
FALSE	High	HEAFESDLAAHQDR		2	4	1	P12814; O43707	0	1625.73	High	4.79	H
FALSE	High	YYTSASGDEMVSLK	1x2PCA [N-Term]	1	1	4	P07900	0	1639.73	High	4.79	Y
FALSE	High	DCGATWVVLGHSER	1xCarbamidomethyl [C2]; 1x2PCA [N-Term]	1	1	8	P60174	0	1675.76	High	4.79	D
FALSE	High	NALVSHLDGTTPVCEDIGR	1xCarbamidomethyl [C14]; 1x2PCA [N-Term]	1	1	1	P31930	0	2143.02	High	4.79	N
FALSE	High	CTGGEVGATSALAPK	1xCarbamidomethyl [C1]; 1x2PCA [N-Term]	1	1	3	P30050	0	1507.72	High	4.79	C
FALSE	High	CIQMWFDPAQGNPNEEVAR	1xCarbamidomethyl [C1]; 1x2PCA [N-Term]	1	1	2	P15328	0	2351.03	High	4.79	C
FALSE	High	LDQILLNGNNITMLVPGGEGPEV	1x2PCA [N-Term]	1	1	1	Q9Y4Y9	0	2482.26	High	4.79	L
FALSE	High	LDYFLLSHSLLPALCDSK	1xCarbamidomethyl [C15]; 1x2PCA [N-Term]	1	1	2	P27695	0	2181.1	High	4.79	L
FALSE	High	SQIHDIVLVGGSTR	1x2PCA [N-Term]	1	1	8	P11142	0	1570.83	High	4.79	S
FALSE	High	LNIISNLDCVNEVIGIR	1xCarbamidomethyl [C9]; 1x2PCA [N-Term]	2	2	4	P30154; P30153	0	2031.07	High	4.78	L
FALSE	High	VCLEITEDGGDSIEVPGAR	1xCarbamidomethyl [C2]; 1x2PCA [N-Term]	1	1	5	P36952	0	2105.98	High	4.78	V
FALSE	High	NDVLDSLGISPDLLPEDFVR	1x2PCA [N-Term]	1	1	2	Q9UBE0	0	2303.16	High	4.78	N
FALSE	High	VYAAATEDMDCLTFGSPVLMR	1xCarbamidomethyl [C11]; 1x2PCA [N-Term]	1	1	1	P39748	0	2436.1	High	4.78	V
FALSE	High	MDLAAAAEPGAGSQHLEVR	1xAcetyl [N-Term]	1	1	1	Q14566	0	1964.95	High	4.78	M
FALSE	High	LQSIGTENTEENRR	1x2PCA [N-Term]	1	1	6	P04075	1	1735.84	High	4.78	L
FALSE	High	VVSLNGELGDSWIVPLDNLTK	1x2PCA [N-Term]	1	1	1	O00592	0	2358.23	High	4.78	V
FALSE	High	GNFTLPEVAECFDEITYVELQK	1xCarbamidomethyl [C11]; 1x2PCA [N-Term]	1	1	5	Q00839	0	2691.26	High	4.78	G
FALSE	High	TGVHHYSGNNIELGTACGK	1xCarbamidomethyl [C17]; 1x2PCA [N-Term]	1	1	3	P62888	0	2103.97	High	4.78	T
FALSE	High	SGCIVNNLAEFTVDPK	1xCarbamidomethyl [C3]; 1x2PCA [N-Term]	1	1	3	O75369	0	1852.89	High	4.77	S
FALSE	High	ATAGDTHLGGEDFDNR	1x2PCA [N-Term]	1	4	5	P0DMV9	0	1764.76	High	4.77	A
FALSE	High	GADFLVTEVENGGSLGSK	1x2PCA [N-Term]	1	1	8	P14618	0	1868.9	High	4.77	G
FALSE	High	WNTDNTLGTEIAIEDQICQGLK	1xCarbamidomethyl [C18]; 1x2PCA [N-Term]	1	1	4	P45880	0	2608.23	High	4.77	W
FALSE	High	DDPLTNLNTAFDVAEK	1x2PCA [N-Term]	1	1	1	P12814	0	1851.88	High	4.77	D
FALSE	High	QTQIFTTYSDNQPGVLIQVYEGER	1x2PCA [N-Term]	1	2	3	P0DMV9	0	2875.39	High	4.77	Q
FALSE	High	IVLFDTLLEEYSVLNK	1x2PCA [N-Term]	1	1	1	O75844	0	1985.06	High	4.77	I
FALSE	High	QSLGELIGTLNAAK	1x2PCA [N-Term]	1	1	7	P60174	0	1503.82	High	4.77	Q
FALSE	High	HVFGESDELIGQK	1x2PCA [N-Term]	1	1	5	P60174	0	1547.75	High	4.77	H
FALSE	High	AVNTLNEALEFAK	1x2PCA [N-Term]	1	1	3	P31327	0	1508.77	High	4.77	A
FALSE	High	AITIAGVPQSVTECVK	1xCarbamidomethyl [C14]; 1x2PCA [N-Term]	1	1	2	Q15365	0	1761.92	High	4.77	A
FALSE	High	AQHEDQVEQYKK	1x2PCA [N-Term]	1	1	1	P02545	1	1591.75	High	4.77	A
FALSE	High	NQLDQEVEFLSTSIAQLK	1x2PCA [N-Term]	1	1	1	Q99471	0	2152.09	High	4.77	N
FALSE	High	TPENYPNAGLTMNYCR	1xCarbamidomethyl [C15]	1	1	2	P00747	0	1900.83	High	4.77	T
FALSE	High	LDLSVTEAVVAGIAK	1x2PCA [N-Term]	1	1	2	P22102	0	1574.88	High	4.77	L
FALSE	High	VHGPGIQSGTTNKPNK	1x2PCA [N-Term]	1	1	6	P21333	0	1723.89	High	4.77	V
FALSE	High	ELDPTNMTYITNQAAVYFEK	1x2PCA [N-Term]	1	1	4	P31948	0	2437.14	High	4.76	E
FALSE	High	FADDTYTESYISTIGVDFK	1x2PCA [N-Term]	2	2	1	P62820; Q9H0U4	0	2261.03	High	4.75	F
FALSE	High	YSNSALGHVNCTIK	1xCarbamidomethyl [C11]; 1x2PCA [N-Term]	1	1	1	Q9NQC3	0	1652.78	High	4.75	Y
FALSE	High	KPLLESGTLGTK		1	1	4	P22314	0	1243.73	High	4.75	K
FALSE	High	LFVGNLPPDITEEEMR	1x2PCA [N-Term]	1	1	9	Q15233	0	1948.95	High	4.75	L
FALSE	High	VTHETSAHEGQTEAPSIDEK	1x2PCA [N-Term]	1	1	2	P15374	0	2255.02	High	4.75	V
FALSE	High	IDSLSAQLSQLQK	1x2PCA [N-Term]	1	1	6	P02545	0	1519.81	High	4.75	I
FALSE	High	EAGAGGLSIAVEGPSK	1x2PCA [N-Term]	1	2	3	O75369	0	1531.78	High	4.75	E
FALSE	High	YELPLVIQALTNIEDK	1x2PCA [N-Term]	1	1	2	Q96QD8	0	1948.04	High	4.75	Y
FALSE	High	GEMMDLQHGSLFLR	1x2PCA [N-Term]	1	1	2	P00338	0	1722.81	High	4.75	G
FALSE	High	EDVGTVVGIDLGTTYSCVGVFK	1xCarbamidomethyl [C17]; 1x2PCA [N-Term]	1	1	2	P11021	0	2405.17	High	4.74	E
FALSE	High	NIIHGSDSVESAEK	1x2PCA [N-Term]	1	1	4	P15531	0	1574.74	High	4.74	N
FALSE	High	VLGILAMIDEGETDWK	1x2PCA [N-Term]	1	1	1	Q15181	0	1878.93	High	4.74	V
FALSE	High	QRPQATAEQIR	1x2PCA [N-Term]	1	1	1	Q14157	0	1386.72	High	4.74	Q
FALSE	High	DQGPNVCALQQILGTK	1xCarbamidomethyl [C7]; 1x2PCA [N-Term]	1	1	1	Q15063	0	1830.92	High	4.74	D
FALSE	High	LVVDLTDIDPDVAYSSVPYEK	1x2PCA [N-Term]	1	1	4	P09960	0	2427.2	High	4.74	L
FALSE	High	GEHPGLSIGDVAK	1x2PCA [N-Term]	1	2	1	P09429	0	1368.69	High	4.74	G
FALSE	High	VDNIQAGELTEGIWR	1x2PCA [N-Term]	1	1	1	Q08945	0	1789.89	High	4.74	V
FALSE	High	IDNSQVESGSLEDDWDFLPPK	1x2PCA [N-Term]	1	1	5	P27797	0	2480.13	High	4.74	I
FALSE	High	VLAGETLSVNDPPDVLDR	1x2PCA [N-Term]	1	1	3	Q12906	0	1999.01	High	4.73	V
FALSE	High	MEDSASASLSSAAATGTSTSTPAAPTAR	1xAcetyl [N-Term]	1	1	1	O76021	0	2639.21	High	4.73	M
FALSE	High	LISQIVSSITASLR	1x2PCA [N-Term]	1	5	4	P68366	0	1576.91	High	4.73	L
FALSE	High	VPFCPMVGSEVYSTEIK	1xCarbamidomethyl [C4]	1	1	2	Q9Y265	0	1942.93	High	4.73	V
FALSE	High	VSVADHSLHLSK	1x2PCA [N-Term]	1	1	2	Q13162	0	1381.72	High	4.73	V
FALSE	High	SGSMDPSGAHPSVR	1x2PCA [N-Term]	1	1	3	Q07666	0	1473.65	High	4.73	S
FALSE	High	LLAVAATAPPDAPNREEVFDER	1x2PCA [N-Term]	1	1	1	P18206	1	2470.24	High	4.73	L
FALSE	High	LAVEALSSLDGDLAGR	1x2PCA [N-Term]	1	1	3	P12277	0	1675.86	High	4.73	L
FALSE	High	EIADLGEALATAVIPQWQK	1x2PCA [N-Term]	1	1	3	P49588	0	2142.12	High	4.73	E
FALSE	High	NAGVEGSLIVEK	1x2PCA [N-Term]	1	1	6	P10809	0	1304.68	High	4.73	N
FALSE	High	VLDFEHFLPMLQTVAK	1x2PCA [N-Term]	1	1	6	P60660	0	1977.03	High	4.73	V
FALSE	High	YEILQSVDDAAIVIK	1x2PCA [N-Term]	1	1	2	Q12906	0	1765.94	High	4.73	Y
FALSE	High	AQQEQELAADAFK	1x2PCA [N-Term]	1	1	4	P14314	0	1537.73	High	4.73	A
FALSE	High	LFIGGLSFETTDESLR	1x2PCA [N-Term]	1	2	12	P09651	0	1873.93	High	4.73	L
FALSE	High	VCNFLASQVPFPSR	1xCarbamidomethyl [C2]; 1x2PCA [N-Term]	1	1	3	Q99714	0	1710.84	High	4.72	V
FALSE	High	VFDFELSSQDMTTLLSYNR	1x2PCA [N-Term]	1	1	2	P15121	0	2355.1	High	4.72	V
FALSE	High	FSVCVLGDQQHCDEAK	2xCarbamidomethyl [C4; C12]; 1x2PCA [N-Term]	1	1	7	P62906	0	1981.85	High	4.72	F
FALSE	High	DCEECIQLEPTFIK	2xCarbamidomethyl [C2; C5]; 1x2PCA [N-Term]	1	1	2	P31948	0	1870.84	High	4.72	D
FALSE	High	SLAGSSGPGASSGTSGDHGELVVR		1	1	1	P29692	0	2185.05	High	4.72	S
FALSE	High	ELDALDANDELTPLGR	1x2PCA [N-Term]	1	1	1	Q08211	0	1830.89	High	4.72	E
FALSE	High	NRPTSISWDGLDSGK	1x2PCA [N-Term]	1	1	4	P30086	0	1721.82	High	4.72	N
FALSE	High	SSGEIVYCGQVFEK	1xCarbamidomethyl [C8]; 1x2PCA [N-Term]	1	1	4	Q02543	0	1691.77	High	4.71	S
FALSE	High	VAGMDVELTVEER	1x2PCA [N-Term]	1	1	5	P62258	0	1536.74	High	4.71	V
FALSE	High	YGALALQEIFDGIQPK	1x2PCA [N-Term]	1	1	1	P55060	0	1851.96	High	4.71	Y
FALSE	High	VTEGLTDVILYHQPDDK	1x2PCA [N-Term]	1	1	3	O60506	0	2032	High	4.71	V
FALSE	High	TATFAISILQQIELDLK	1x2PCA [N-Term]	1	1	2	P60842	0	1993.1	High	4.71	T
FALSE	High	MYGISLCQAILDETK	1xCarbamidomethyl [C7]; 1x2PCA [N-Term]	1	1	7	P04083	0	1830.88	High	4.71	M
FALSE	High	VEEQEPELTSTPNFVVEVIK	1x2PCA [N-Term]	1	1	10	Q07021	0	2376.2	High	4.71	V
FALSE	High	LQAEAPHIVVGTPGR	1x2PCA [N-Term]	1	1	1	Q14240	0	1633.88	High	4.71	L
FALSE	High	ILAIGLINEALDEGDAQK	1x2PCA [N-Term]	1	1	4	P46940	0	1972.04	High	4.71	I
FALSE	High	AVDIPHMDIEALK	1x2PCA [N-Term]	1	1	3	P62906	0	1540.78	High	4.7	A
FALSE	High	VAALTGLPFVTAPNK	1x2PCA [N-Term]	1	1	4	P07954	0	1587.89	High	4.7	V
FALSE	High	NVTELNEPLSNEER	1x2PCA [N-Term]	1	1	3	P61981	0	1732.81	High	4.7	N
FALSE	High	EGILSDEIYCPPETAVLLGSYAVQAK	1xCarbamidomethyl [C10]; 1x2PCA [N-Term]	1	1	1	P15311	0	2912.44	High	4.7	E
FALSE	High	AHAAQVTCVAASPHK	1xCarbamidomethyl [C8]; 1x2PCA [N-Term]	1	1	3	Q9BQA1	0	1636.8	High	4.7	A
FALSE	High	IIGATDSSGELMFLMK	1x2PCA [N-Term]	1	2	5	Q13185	0	1801.89	High	4.7	I
FALSE	High	LIIVSNPVDILTYVAWK	1x2PCA [N-Term]	1	2	4	P00338	0	2033.15	High	4.7	L
FALSE	High	KQPPVSPGTALVGSQK	1x2PCA [N-Term]	1	1	2	P17096	1	1682.92	High	4.7	K
FALSE	High	LIAPVAEEEATVPNNK	1x2PCA [N-Term]	1	1	8	P07195	0	1783.92	High	4.7	L
FALSE	High	GDGPICLVLAPTR	1xCarbamidomethyl [C6]; 1x2PCA [N-Term]	2	2	1	Q92841; P17844	0	1457.76	High	4.7	G
FALSE	High	ILSISADIETIGEILK	1x2PCA [N-Term]	1	1	4	P61978	0	1804.01	High	4.7	I
FALSE	High	GYTSWAIGLSVADLAESIMK	1x2PCA [N-Term]	1	1	1	P00338	0	2201.09	High	4.69	G
FALSE	High	NLLHVTDTGVGMTR	1x2PCA [N-Term]	1	1	4	P14625	0	1602.81	High	4.69	N
FALSE	High	QASIQHIQNAIDTEK	1x2PCA [N-Term]	1	1	2	P24539	0	1784.89	High	4.69	Q
FALSE	High	LDSVIEFSIPDSLLIR	1x2PCA [N-Term]	1	1	4	P54819	0	1906.03	High	4.69	L
FALSE	High	QVLVAPGNAGTACSEK	1xCarbamidomethyl [C13]; 1x2PCA [N-Term]	1	1	1	P22102	0	1690.82	High	4.69	Q
FALSE	High	SVGDGETVEFDVVEGEK	1x2PCA [N-Term]	1	3	2	P67809	0	1884.85	High	4.69	S
FALSE	High	YADLTEDQLPSCESLK	1xCarbamidomethyl [C12]; 1x2PCA [N-Term]	1	1	4	P18669	0	1957.88	High	4.69	Y
FALSE	High	LAAAVSNFGYDLYR	1x2PCA [N-Term]	1	1	4	P36955	0	1648.81	High	4.69	L
FALSE	High	EILVGDVGQTVDDPYATFVK		1	1	3	P23528	0	2166.1	High	4.69	E
FALSE	High	GVNLPGAAVDLPAVSEK	1x2PCA [N-Term]	1	1	8	P14618	0	1725.92	High	4.69	G
FALSE	High	AQTAHIVLEDGTK	1x2PCA [N-Term]	1	1	5	P31327	0	1471.75	High	4.68	A
FALSE	High	AGGIETIANEYSDR	1x2PCA [N-Term]	1	1	1	P34932	0	1584.73	High	4.68	A
FALSE	High	DAAIYLVTSLASK	1x2PCA [N-Term]	1	1	3	P55060	0	1440.77	High	4.68	D
FALSE	High	AIAELGIYPAVDPLDSTSR	1x2PCA [N-Term]	1	1	9	P06576	0	2077.06	High	4.68	A
FALSE	High	AQAEAQQPTFDALRDELR	1x2PCA [N-Term]	1	1	1	Q15149	1	2148.05	High	4.68	A
FALSE	High	MQNDAGEFVDLYVPR	1xAcetyl [N-Term]	1	1	3	P63220	0	1795.83	High	4.68	M
FALSE	High	TITLEVEPSDTIENVK	1x2PCA [N-Term]	1	4	14	P62979	0	1876.95	High	4.68	T
FALSE	High	IQVLGSLVSLEMGK	1x2PCA [N-Term]	1	1	2	P49419	0	1562.86	High	4.68	I
FALSE	High	QIVWNGPVGVFEWEAFAR	1x2PCA [N-Term]	1	1	2	P00558	0	2194.09	High	4.67	Q
FALSE	High	LIQSHPESAEDLQEK	1x2PCA [N-Term]	1	1	1	Q13813	0	1812.88	High	4.67	L
FALSE	High	AAVENLPTFLVELSR	1x2PCA [N-Term]	1	1	8	Q14974	0	1747.94	High	4.67	A
FALSE	High	EIRPALELLEPIEQK	1x2PCA [N-Term]	1	1	2	P50395	0	1867.03	High	4.67	E
FALSE	High	YEDICPSTHNMDVPNIK	1xCarbamidomethyl [C5]; 1x2PCA [N-Term]	1	3	3	P63241	0	2121.94	High	4.67	Y
FALSE	High	LIDLHSPSEIVK	1x2PCA [N-Term]	1	1	6	P60866	0	1439.79	High	4.67	L
FALSE	High	AFHNEAQVNPER	1x2PCA [N-Term]	1	1	2	P17987	0	1500.7	High	4.67	A
FALSE	High	VESLQEEIAFLK	1x2PCA [N-Term]	1	1	11	P08670	0	1494.78	High	4.67	V
FALSE	High	EYFGAFGEIENIELPMDTK	1x2PCA [N-Term]	1	1	4	O14979	0	2292.05	High	4.67	E
FALSE	High	AHSSMVGVNLPQK	1xOxidation [M5]; 1x2PCA [N-Term]	1	1	7	P00558	0	1472.73	High	4.67	A
FALSE	High	VAGQDGSVVQFK	1x2PCA [N-Term]	1	3	4	P61956	0	1323.67	High	4.67	V
FALSE	High	TISSSLAVVDLIDAIQPGCINYDLVK	1xCarbamidomethyl [C19]; 1x2PCA [N-Term]	1	1	1	P13797	0	2893.5	High	4.67	T
FALSE	High	VMLGETNPADSKPGTIR	1x2PCA [N-Term]	2	3	7	P15531; P22392	0	1874.94	High	4.67	V
FALSE	High	DDVFLSVPCILGQNGISDLVK	1xCarbamidomethyl [C9]; 1x2PCA [N-Term]	1	1	18	P00338	0	2378.21	High	4.67	D
FALSE	High	TDAPQPDVKEEEEEKEEEK		1	1	1	P27824	2	2259.01	High	4.67	T
FALSE	High	DASLMVTNDGATILK	1x2PCA [N-Term]	1	1	3	P78371	0	1637.82	High	4.66	D
FALSE	High	IDCFSEVPTSVFGEK	1xCarbamidomethyl [C3]; 1x2PCA [N-Term]	1	1	1	O00567	0	1803.83	High	4.66	I
FALSE	High	DNYVPEVSALDQEIIEVDPDTK	1x2PCA [N-Term]	1	1	7	P08708	0	2578.22	High	4.66	D
FALSE	High	ACQSIYPLHDVFVR	1xCarbamidomethyl [C2]; 1x2PCA [N-Term]	1	1	6	P61247	0	1793.88	High	4.66	A
FALSE	High	SQIFSTASDNQPTVTIK	1x2PCA [N-Term]	1	1	10	P11021	0	1925.96	High	4.66	S
FALSE	High	EYFGGFGEVESIELPMDNK	1x2PCA [N-Term]	1	1	3	Q14103	0	2250.01	High	4.66	E
FALSE	High	SQETECTYFSTPLLLGK	1xCarbamidomethyl [C6]; 1x2PCA [N-Term]	1	1	4	P40926	0	2062.98	High	4.65	S
FALSE	High	MDIRPNHTIYINNMNDK	1xAcetyl [N-Term]	1	1	1	P08579	0	2131.01	High	4.65	M
FALSE	High	AAAEVAGQFVIK	1x2PCA [N-Term]	1	1	2	P02786	0	1292.7	High	4.65	A
FALSE	High	YHTINGHNCEVK	1xCarbamidomethyl [C9]; 1x2PCA [N-Term]	1	1	3	P51991	0	1560.7	High	4.65	Y
FALSE	High	YGIVDYMIEQSGPPSK	1x2PCA [N-Term]	1	1	1	P13667	0	1872.88	High	4.65	Y
FALSE	High	ILADLEDYLNELWEDK	1x2PCA [N-Term]	1	2	1	B5ME19	0	2067.99	High	4.65	I
FALSE	High	LFVGNLPADITEDEFK	1x2PCA [N-Term]	1	1	14	P23246	0	1896.94	High	4.65	L
FALSE	High	LGFAGLVQEISFGTTK	1x2PCA [N-Term]	1	1	5	P48643	0	1756.93	High	4.65	L
FALSE	High	YNILGTNTIMDK	1x2PCA [N-Term]	1	1	4	Q00839	0	1471.72	High	4.64	Y
FALSE	High	FSAVLVEPPPMSLPGAGLSSQELSGGPGDGP	1x2PCA [N-Term]	1	1	1	Q13263	0	3039.48	High	4.64	F
FALSE	High	LDRETEELHHDR	1x2PCA [N-Term]	1	1	1	O60869	1	1638.76	High	4.64	L
FALSE	High	VLFASQEIPASPFR	1x2PCA [N-Term]	1	1	8	O75369	0	1650.86	High	4.64	V
FALSE	High	SAYALGGLGSGICPNR	1xCarbamidomethyl [C13]; 1x2PCA [N-Term]	1	1	2	P31327	0	1681.81	High	4.64	S
FALSE	High	LLDAVDTYIPVPAR	1x2PCA [N-Term]	1	1	8	P49411	0	1631.88	High	4.64	L
FALSE	High	TPGRPTSSQSYEQNIK		1	1	1	O60573	0	1792.88	High	4.64	T
FALSE	High	TDYNASVSVPDSSGPER	1x2PCA [N-Term]	1	1	5	P61978	0	1869.82	High	4.64	T
FALSE	High	AGGAAVVITEPEHTK	1x2PCA [N-Term]	1	1	4	Q9P258	0	1568.81	High	4.63	A
FALSE	High	LFADAVQELLPQYK	1x2PCA [N-Term]	1	1	3	P33993	0	1723.91	High	4.63	L
FALSE	High	IFEDIPTLEDLAETLK	1x2PCA [N-Term]	1	1	2	Q16666	0	1935.99	High	4.63	I
FALSE	High	VNPCIGGVILFHETLYQK	1xCarbamidomethyl [C4]; 1x2PCA [N-Term]	1	1	1	P04075	0	2177.12	High	4.63	V
FALSE	High	CEFQDAYVLLSEK	1xCarbamidomethyl [C1]; 1x2PCA [N-Term]	1	1	4	P10809	0	1690.78	High	4.63	C
FALSE	High	VTHAVVTVPAYFNDAQR		1	1	1	P11021	0	1887.97	High	4.63	V
FALSE	High	LAQANGWGVMVSHR	1xOxidation [M10]; 1x2PCA [N-Term]	1	1	2	P06733	0	1630.79	High	4.63	L
FALSE	High	FYVPPTQEDGVDPVEAFAQNVLSK	1x2PCA [N-Term]	1	1	4	Q08945	0	2739.33	High	4.63	F
FALSE	High	VGTGEPCCDWVGDEGAGHFVK	2xCarbamidomethyl [C7; C8]; 1x2PCA [N-Term]	1	1	1	P52209	0	2366	High	4.63	V
FALSE	High	FPVEMTHNHNFR		1	1	2	P05546	0	1528.71	High	4.63	F
FALSE	High	NQVALNPQNTVFDAK	1x2PCA [N-Term]	1	1	5	P0DMV9	0	1747.88	High	4.63	N
FALSE	High	LPGGELNPGEDEVEGLK		1	1	2	O43809	0	1752.87	High	4.62	L
FALSE	High	LNLEAINYMAADGDFK	1x2PCA [N-Term]	1	1	5	P09382	0	1873.88	High	4.62	L
FALSE	High	TCTTVAFTQVNSEDK	1xCarbamidomethyl [C2]; 1x2PCA [N-Term]	1	1	4	P62424	0	1789.81	High	4.62	T
FALSE	High	WVDPNSPVLLEDPVLCALAK	1xCarbamidomethyl [C16]; 1x2PCA [N-Term]	1	1	5	P42330	0	2325.19	High	4.62	W
FALSE	High	VGGTSDVEVNEK	1x2PCA [N-Term]	1	1	6	P10809	0	1322.62	High	4.62	V
FALSE	High	LGVCFDVPTASVTEIQEK	1xCarbamidomethyl [C4]; 1x2PCA [N-Term]	1	1	3	Q9NR30	0	2082.02	High	4.62	L
FALSE	High	IWCFGPDGTGPNILTDITK	1xCarbamidomethyl [C3]; 1x2PCA [N-Term]	1	1	15	P13639	0	2194.06	High	4.62	I
FALSE	High	ASLEGNLAETENR	1x2PCA [N-Term]	1	1	6	Q04695	0	1492.7	High	4.61	A
FALSE	High	SLDMDSIIAEVK	1x2PCA [N-Term]	1	1	10	P05787	0	1409.7	High	4.61	S
FALSE	High	HSGPNSADSANDGFVR	1x2PCA [N-Term]	1	1	2	P52597	0	1719.75	High	4.61	H
FALSE	High	LLPQLTYLDGYDRDDK	1x2PCA [N-Term]	1	1	7	P39687	1	2013.99	High	4.61	L
FALSE	High	DDVAQTDLLQIDPNFGSK	1x2PCA [N-Term]	1	1	2	P08195	0	2064.99	High	4.61	D
FALSE	High	LGLLGLANSLAIEGR	1x2PCA [N-Term]	1	1	2	P51659	0	1585.91	High	4.6	L
FALSE	High	VMTIAPGLFGTPLLTSLPEK	1x2PCA [N-Term]	1	1	4	Q99714	0	2174.19	High	4.6	V
FALSE	High	WGDAGAEYVVESTGVFTTMEK	1x2PCA [N-Term]	1	1	23	P04406	0	2366.06	High	4.6	W
FALSE	High	VPTANVSVVDLTCR	1xCarbamidomethyl [C13]	1	1	9	P04406	0	1530.79	High	4.6	V
FALSE	High	TCGFDFTGAVEDISK	1xCarbamidomethyl [C2]; 1x2PCA [N-Term]	1	1	3	P00505	0	1735.76	High	4.6	T
FALSE	High	QSGEAFVELGSEDDVK	1x2PCA [N-Term]	1	1	2	P52597	0	1798.81	High	4.6	Q
FALSE	High	VTADVINAAEK	1x2PCA [N-Term]	1	1	4	O43175	0	1219.63	High	4.6	V
FALSE	High	MVNPTVFFDIAVDGEPLGR	1xAcetyl [N-Term]	1	1	7	P62937	0	2119.05	High	4.6	M
FALSE	High	QLNSESLSQWTNPSTMANAK	1x2PCA [N-Term]	1	1	2	P36952	0	2296.07	High	4.6	Q
FALSE	High	VDVEVPDVSLEGPEGK	1x2PCA [N-Term]	1	1	2	Q09666	0	1757.86	High	4.6	V
FALSE	High	FLDGNELTLADCNLLPK	1xCarbamidomethyl [C12]; 1x2PCA [N-Term]	1	1	12	O00299	0	2022	High	4.6	F
FALSE	High	IEDGNDFGVAIQEK	1x2PCA [N-Term]	1	1	2	Q9UL46	0	1623.76	High	4.59	I
FALSE	High	VSGLLVLDYSK	1x2PCA [N-Term]	1	1	4	P31327	0	1282.7	High	4.59	V
FALSE	High	HTGPNSPDTANDGFVR		2	2	3	P31943; P55795	0	1684.77	High	4.59	H
FALSE	High	LEAAEDIAYQLSR	1x2PCA [N-Term]	1	1	3	P35232	0	1567.78	High	4.59	L
FALSE	High	AYLPVNESFGFTADLR	1x2PCA [N-Term]	1	1	12	P13639	0	1888.92	High	4.59	A
FALSE	High	FTNLLTSILDSAETK	1x2PCA [N-Term]	1	1	3	Q16719	0	1741.9	High	4.59	F
FALSE	High	ILLELLNQMDGFDQNVNVK	1x2PCA [N-Term]	1	1	3	P43686	0	2292.17	High	4.59	I
FALSE	High	DTNGSQFFITTVK	1x2PCA [N-Term]	1	1	4	P23284	0	1546.75	High	4.59	D
FALSE	High	AHTMTDDVTFWK	1x2PCA [N-Term]	1	1	1	Q00610	0	1540.69	High	4.59	A
FALSE	High	LPRPPPPEMPESLK		1	1	4	Q00325	0	1587.86	High	4.58	L
FALSE	High	YDERPGPSPLPHR	1x2PCA [N-Term]	1	1	1	P08621	0	1609.79	High	4.58	Y
FALSE	High	MAVTFIGNSTAIQELFK	1x2PCA [N-Term]	1	1	6	P07437	0	1959	High	4.58	M
FALSE	High	FSASGELGNGNIK	1x2PCA [N-Term]	1	1	2	P12004	0	1382.67	High	4.58	F
FALSE	High	VFASELNAGIIK	1x2PCA [N-Term]	1	1	1	Q9P2J5	0	1350.74	High	4.58	V
FALSE	High	IDVLLQQIEELGSEGK	1x2PCA [N-Term]	1	1	1	O95232	0	1859.97	High	4.58	I
FALSE	High	IIDVVYNASNNELVR	1x2PCA [N-Term]	1	1	10	P62241	0	1807.93	High	4.58	I
FALSE	High	LVLEVAQHLGESTVR	1x2PCA [N-Term]	1	1	4	P06576	0	1739.94	High	4.58	L
FALSE	High	AAVDAGFVPNDMQVGQTGK	1x2PCA [N-Term]	1	1	1	P13804	0	1993.94	High	4.58	A
FALSE	High	ADIEVACYGYEGIDAVK	1xCarbamidomethyl [C7]; 1x2PCA [N-Term]	1	1	1	P05198	0	1961.89	High	4.58	A
FALSE	High	FGYVDFESAEDLEK	1x2PCA [N-Term]	1	1	5	P19338	0	1737.76	High	4.58	F
FALSE	High	DAGEGLLAVQITDQEGKPK	1x2PCA [N-Term]	1	1	2	O75369	0	2058.05	High	4.58	D
FALSE	High	IPEISIQDMTAQVTSPSGK		1	1	2	P21333	0	2002.02	High	4.58	I
FALSE	High	STGEAFVQFASQEIAEK	1x2PCA [N-Term]	2	2	4	P31943; P55795	0	1930.92	High	4.58	S
FALSE	High	LQMEAPHIIVGTPGR	1x2PCA [N-Term]	1	1	5	P60842	0	1707.9	High	4.57	L
FALSE	High	SNNVEMDWVLK	1x2PCA [N-Term]	1	1	3	P31943	0	1423.67	High	4.57	S
FALSE	High	GVVPLAGTNGETTTQGLDGLSER		1	1	2	P04075	0	2272.14	High	4.57	G
FALSE	High	VSDATGQMNLTK	1x2PCA [N-Term]	1	1	2	P40121	0	1353.65	High	4.57	V
FALSE	High	FLSQPFQVAEVFTGHMGK	1xOxidation [M16]; 1x2PCA [N-Term]	1	1	2	P06576	0	2128.03	High	4.57	F
FALSE	High	MLVLDEADEMLNK	1x2PCA [N-Term]	1	1	3	P38919	0	1609.76	High	4.57	M
FALSE	High	VLALSVETDYTFPLAEK	1x2PCA [N-Term]	1	1	14	P05388	0	1985.03	High	4.57	V
FALSE	High	MLLCEAVAAVMAK	1xCarbamidomethyl [C4]; 1x2PCA [N-Term]	1	1	1	P54136	0	1495.75	High	4.57	M
FALSE	High	TIGGGDDSFNTFFSETGAGK	1x2PCA [N-Term]	1	5	11	Q71U36	0	2096.92	High	4.57	T
FALSE	High	TFTTQETITNAETAK	1x2PCA [N-Term]	1	1	3	P06744	0	1744.84	High	4.57	T
FALSE	High	VAVNDAHLLQYNHR	1x2PCA [N-Term]	1	1	2	P17931	0	1738.88	High	4.57	V
FALSE	High	GAEAANVTGPGGVPVQGSK	1x2PCA [N-Term]	1	1	3	P67809	0	1784.89	High	4.57	G
FALSE	High	IEWLESHQDADIEDFK		1	1	1	P11021	0	1974.91	High	4.57	I
FALSE	High	TTHFVEGGDAGNREDQINR	1x2PCA [N-Term]	1	1	7	P18124	1	2205.01	High	4.57	T
FALSE	High	AALSALESFLK	1x2PCA [N-Term]	1	1	4	P78527	0	1238.68	High	4.56	A
FALSE	High	VDEAVAVLQAHQAK	1x2PCA [N-Term]	1	2	5	P11940	0	1567.82	High	4.56	V
FALSE	High	VFVGGLSPDTSEEQIK	1x2PCA [N-Term]	1	1	5	O14979	0	1794.89	High	4.56	V
FALSE	High	HWPFQVINDGDKPK	1x2PCA [N-Term]	1	1	2	P0DMV9	0	1769.88	High	4.56	H
FALSE	High	ELEEIVQPIISK	1x2PCA [N-Term]	1	1	7	P11021	0	1486.82	High	4.56	E
FALSE	High	VGNLGLATSFFNER	1x2PCA [N-Term]	1	1	2	O00571	0	1613.81	High	4.56	V
FALSE	High	LYGSAGPPPTGEEDTAEK	1x2PCA [N-Term]	1	1	2	P11021	0	1907.87	High	4.56	L
FALSE	High	EVTINQSLLAPLR	1x2PCA [N-Term]	1	1	7	P08729	0	1542.86	High	4.56	E
FALSE	High	DDPVTNLNNAFEVAEK	1x2PCA [N-Term]	1	1	2	O43707	0	1864.87	High	4.56	D
FALSE	High	SLNLSTEFISSTK	1x2PCA [N-Term]	1	1	4	P36952	0	1515.77	High	4.56	S
FALSE	High	TTQVPQFILDDFIQNDR	1x2PCA [N-Term]	1	1	8	Q08211	0	2139.05	High	4.56	T
FALSE	High	EAYPGDVFYLHSR	1x2PCA [N-Term]	1	1	4	P25705	0	1642.76	High	4.56	E
FALSE	High	FNADEFEDMVAEK	1x2PCA [N-Term]	1	1	5	P27635	0	1633.68	High	4.56	F
FALSE	High	EFVEEFIWPAIQSSALYEDR	1x2PCA [N-Term]	1	1	6	P00966	0	2518.19	High	4.55	E
FALSE	High	NQVAMNPTNTVFDAK	1x2PCA [N-Term]	1	1	5	P11142	0	1738.82	High	4.55	N
FALSE	High	LGQSDPAPLQHQMDIYQK	1xOxidation [M13]; 1x2PCA [N-Term]	1	1	2	P29401	0	2174.03	High	4.55	L
FALSE	High	LGGEVSCLVAGTK	1xCarbamidomethyl [C7]; 1x2PCA [N-Term]	1	1	3	P13804	0	1379.7	High	4.55	L
[truncated: 5,441 more rows]

## Sheet: Supp Table S4 - 2PCA B
Checked	Confidence	Sequence	Modifications	# Protein Groups	# Proteins	# PSMs	Master Protein Accessions	# Missed Cleavages	Theo. MH+ [Da]	Confidence (by Search Engine): Sequest HT	XCorr (by Search Engine): Sequest HT	First Amino Acid
[truncated: 6,514 more rows]

[truncated: 3 more sheets: Supp Table S5 - 2PCA Mod Only A, Supp Table S6 - 2PCA Mod Only B, Supp Table S7 - Effiiciency]
